# Supplementary material for: Proteome Analysis of Walnut Bacterial Blight Disease
Source: Int J Mol Sci. 2020 Oct 9;21(20):7453. doi: 10.3390/ijms21207453 (PMC7593943; doi:10.3390/ijms21207453)
Supplement: Supplementary file 1 [file ijms-21-07453-s001.xlsx]

## Sheet: Index
Sagawa and Assis et al. 2020 - Supplemental material
Index
Table S1. Complete Juglans regia proteome of diseased and mock samples and annotations
Table S2. Proteome of 676 proteins of Xanthomonas arboricola pv. junglandis 417.
Table S3. Complete list of PLS-DA - VIP scores for Juglans regia.
Table S4. Hypothetical proteins from Xaj identified in infected walnuts.
Table S5. PANTHER Overrepresentation Test of 411 proteins with increased abundance. Gene ontology analysis of Biological Process, Molecular Function, Cellular Component, PANTHER Class, and PANTHER pathway.
Table S6. PANTHER Overrepresentation Test of 272 proteins with reduced abundance. Gene ontology analysis of Biological Process, Molecular Function, Cellular Component, PANTHER Class, and PANTHER pathway.
Table S7. PANTHER Overrepresentation Test of 676 proteins of Xaj with increased abundance. Gene ontology analysis of Biological Process, Molecular Function, Cellular Component, PANTHER Class, and PANTHER pathway.
Table S8. 411 proteins with log2FC >=1 and FDR < 0.05 (high and med) comparing walnuts inoculated with Xaj with mock. Values shown are normalized protein abundance.
Table S9. 272 proteins with log2FC <=-1 and FDR < 0.05 (high and med) comparing walnuts inoculated with Xaj with mock. Values shown are normalized protein abundance.
Table S10. Juglans regia proteins associated with defense response.
Table S11: Shikimate and phenylpropanoid biosynthesis proteins.

## Sheet: Table S1
Table S1. Complete Juglans regia proteome of diseased and mock samples and annotations
Walnut v.2 Accession	NCBI Gene ID (jre)	Uniprot ID ortholog (ath)	NCBI gene ID ortholog ID (vvi)	Protein Name	Molecular weight (Da)	Total abundance						ave_Inf	ave_Mock	FC (Inf/Mock)	log2 FC (Inf/Mock)	Direction	Statistical tests
						Inf1_2	Inf2_1	Inf3_2	Mock1_2	Mock2_1	Mock3_1						P-value	FDR	candidate
Jr08_05430_p1	109018768	Q9M0C2	VIT_07s0005g04330	Putative EG45-like domain containing protein 1	13836	7.74083e+07	8.66033e+07	8.37106e+07	1.2885e+06	4.31102e+06	2.40778e+06	8.25741e+07	2.6691e+06	30.937	4.95126	up	6.68795e-28	2.04106e-26	high
Jr06_19610_p1	109012912	O81862	VIT_11s0149g00350	Class V chitinase (AtChiC)	39464	3.59691e+07	4.37751e+07	3.73531e+07	823370	2.60709e+06	998313	3.90324e+07	1.47626e+06	26.4401	4.72466	up	8.99895e-23	1.9386e-21	high
Jr02_20290_p1	109011765	Q9LMU2	VIT_00s0270g00120	Kunitz trypsin inhibitor 2 (AtKTI2)	25454	1.79342e+08	2.3791e+08	1.66955e+08	3.33955e+06	1.49824e+07	6.25115e+06	1.94736e+08	8.19102e+06	23.7743	4.57133	up	5.45509e-16	6.88889e-15	high
Jr06_13250_p1_family	109013532	P28493	VIT_08s0007g04650	Pathogenesis-related protein 5 (PR-5)	25756	5.29212e+07	6.719e+07	5.5426e+07	1.17588e+06	4.1172e+06	2.32708e+06	5.85124e+07	2.54006e+06	23.0359	4.52581	up	1.40489e-22	2.98743e-21	high
Jr05_14480_p1	109011271	Q8VZJ2	VIT_05s0077g01150	Probable glucan endo-1,3-beta-glucosidase At4g16260	37942	1.45225e+08	1.69057e+08	1.52124e+08	3.54498e+06	1.24085e+07	6.88769e+06	1.55469e+08	7.61373e+06	20.4195	4.35188	up	1.21055e-21	2.40361e-20	high
Jr16_18600_p1	109008986	Q9SFF9	VIT_14s0060g02700	Germin-like protein subfamily 1 member 7	24840	1.50767e+07	1.56781e+07	1.05301e+07	409647	1.20741e+06	444967	1.37616e+07	687342	20.0215	4.32348	up	2.2908e-19	3.87204e-18	high
Jr02_20270_p1	109011731	Q9LMU2	VIT_00s0270g00120	Kunitz trypsin inhibitor 2 (AtKTI2)	23564	1.20409e+08	1.56152e+08	1.07262e+08	3.98946e+06	1.12706e+07	5.32284e+06	1.27941e+08	6.86096e+06	18.6477	4.22093	up	4.77863e-23	1.05707e-21	high
Jr04_22500_p1	109013108	P28493	VIT_08s0007g04650	Pathogenesis-related protein 5 (PR-5)	26170	8.56331e+07	1.1022e+08	7.56123e+07	4.22884e+06	7.00544e+06	4.03243e+06	9.04884e+07	5.08891e+06	17.7815	4.15231	up	3.59517e-47	4.73987e-45	high
Jr15_03790_p1 (+1)	109009955	Q9SY57	VIT_18s0001g06610	Protein PHLOEM PROTEIN 2-LIKE A10 (AtPP2-A10)	23440	1.25311e+07	1.52882e+07	1.09526e+07	387778	1.22396e+06	574941	1.2924e+07	728892	17.731	4.1482	up	1.68554e-20	3.00299e-19	high
Jr11_07700_p1	108992001	Q9M0C2	VIT_07s0005g04330	Putative EG45-like domain containing protein 1	15280	7.65204e+07	9.25787e+07	8.69928e+07	3.78374e+06	6.83684e+06	4.80521e+06	8.53639e+07	5.14193e+06	16.6015	4.05324	up	2.02916e-57	4.45873e-55	high
Jr09_11460_p1_family	108997168	P50700	VIT_02s0025g04270	Osmotin-like protein OSM34	26398	1.71495e+08	1.76385e+08	1.5957e+08	7.52795e+06	1.47357e+07	8.68713e+06	1.6915e+08	1.03169e+07	16.3954	4.03522	up	1.96624e-45	2.23473e-43	high
Jr12_13520_p1	108980790	Q9M2U5	VIT_05s0094g00220	Endochitinase EP3	28792	1.29958e+07	1.91409e+07	1.58134e+07	561193	1.48274e+06	902735	1.59834e+07	982222	16.2727	4.02438	up	4.17408e-26	1.13701e-24	high
Jr02_11050_p1	109000150	Q9C9W9	VIT_04s0008g03210	Adagio protein 3	20118	1.25995e+07	1.80721e+07	9.97557e+06	547503	1.3192e+06	652099	1.3549e+07	839600	16.1375	4.01234	up	1.39024e-22	2.97547e-21	high
Jr03_17420_p1	108995270	Q9SVG5	VIT_12s0028g01790	Berberine bridge enzyme-like 18 (AtBBE-like 18)	60848	398717	391526	345957	18507.2	31500.5	21307.1	378733	23771.6	15.9322	3.99386	up	6.29709e-47	7.98277e-45	high
Jr13_22970_p1	108994024	Q9SSK5	VIT_01s0011g05120	MLP-like protein 43	17956	2.9264e+06	3.52631e+06	4.02434e+06	160655	276250	323808	3.49235e+06	253571	13.7727	3.78374	up	2.08452e-36	1.041e-34	high
Jr07_21900_p1	108980281	Q9C7Z9	VIT_11s0052g00790	Serine carboxypeptidase-like 18	53302	2.57862e+06	3.74673e+06	3.7374e+06	169786	320410	241854	3.35425e+06	244016	13.746	3.78094	up	6.91025e-38	4.29739e-36	high
Jr07_21670_p1	108980762	Q9M2U5	VIT_05s0094g00220	Endochitinase EP3	32531	2.15404e+07	2.79198e+07	2.27805e+07	1.56821e+06	2.28339e+06	1.41394e+06	2.40802e+07	1.75518e+06	13.7195	3.77816	up	3.39353e-58	7.98934e-56	high
Jr12_13490_p1	108980812	Q9M2U5	VIT_05s0094g00340	Endochitinase EP3	25193	4.9063e+06	5.15822e+06	4.53571e+06	335381	469786	282298	4.86674e+06	362488	13.4259	3.74695	up	2.17478e-61	7.96454e-59	high
Jr05_14500_p1	109011272	Q8VZJ2	VIT_05s0077g01150	Probable glucan endo-1,3-beta-glucosidase At4g16260	37798	8.35901e+07	9.1163e+07	9.47035e+07	6.00802e+06	8.94831e+06	6.95584e+06	8.98189e+07	7.30406e+06	12.2971	3.62025	up	1.12642e-79	6.18778e-77	high
Jr03_06810_p1	108979139	Q8RX56	VIT_00s0480g00060	Polyphenol oxidase 2 (JrPPO2)	68339	2.09286e+08	2.5535e+08	2.70422e+08	1.47867e+07	2.4724e+07	2.10082e+07	2.45019e+08	2.01729e+07	12.1459	3.6024	up	2.06284e-52	3.57848e-50	high
Jr11_14470_p1	108984117	Q5XPJ9	VIT_07s0005g00080	Protein SCAR2 (AtSCAR2)	33334	1.40405e+07	1.6251e+07	1.6206e+07	740375	1.77492e+06	1.33383e+06	1.54992e+07	1.28304e+06	12.08	3.59455	up	1.1311e-28	3.69119e-27	high
Jr14_07620_p2	108996957	Q9LLR6	VIT_06s0004g08060	Non-specific lipid-transfer protein 4 (LTP 4)	11970	3.74588e+07	2.02672e+07	1.49559e+07	1.67372e+06	2.39544e+06	2.48606e+06	2.42273e+07	2.18507e+06	11.0876	3.47088	up	1.05407e-20	1.93013e-19	high
Jr10_16930_p1 (+1)	108999736	Q9SK32	VIT_01s0137g00430	Protein MAIN-LIKE 1	61868	495020	602901	539437	26734.2	77978.9	52777.5	545786	52496.9	10.3965	3.37803	up	2.07835e-17	3.00449e-16	high
Jr09_15520_p1	108993884	O65398	VIT_10s0116g01660	Lactoylglutathione lyase GLX1	34485	9.87707e+06	1.03209e+07	8.22763e+06	599450	1.13389e+06	1.00454e+06	9.47521e+06	912628	10.3823	3.37606	up	1.65919e-37	9.94306e-36	high
Jr02_20280_p1	109011739	Q9LMU2	VIT_00s0270g00120	Kunitz trypsin inhibitor 2 (AtKTI2)	26225	1.43401e+07	2.26197e+07	1.27998e+07	1.24713e+06	2.24238e+06	1.35805e+06	1.65865e+07	1.61586e+06	10.2649	3.35964	up	4.04471e-25	1.02549e-23	high
Jr14_03430_p1	109016313	Q84WU2	VIT_15s0021g02050	Ubiquitin carboxyl-terminal hydrolase 13	30087	2.46832e+07	2.83335e+07	2.33466e+07	2.19578e+06	2.99092e+06	2.39108e+06	2.54545e+07	2.52593e+06	10.0773	3.33303	up	9.7858e-81	6.4508e-78	high
Jr06_06800_p1 (+2)	108983646	Q8VZ56	VIT_03s0063g00400	Alpha-amylase 1 (AtAMY1)	45498	6.33038e+07	7.9579e+07	7.47195e+07	6.31648e+06	9.43117e+06	6.55299e+06	7.25341e+07	7.43355e+06	9.75767	3.28654	up	7.49853e-55	1.5447e-52	high
Jr12_10780_p1	108994807	Q93VR4	VIT_05s0077g01650	MLP-like protein 423	17590	3.64829e+07	5.49212e+07	4.19837e+07	2.12713e+06	6.31228e+06	5.33639e+06	4.44626e+07	4.59193e+06	9.68276	3.27542	up	1.82968e-15	2.19295e-14	high
Jr09_07120_p1	109008038	Q9ZVJ5	VIT_02s0012g00750	Haloacid dehalogenase-like hydrolase domain-containing protein Sgpp	27079	1.43018e+07	2.03115e+07	1.36385e+07	1.48291e+06	2.01763e+06	1.49056e+06	1.60839e+07	1.6637e+06	9.66758	3.27315	up	1.07925e-47	1.54661e-45	high
Jr08_05390_p1	108981499	Q9ZV52	VIT_07s0005g04330	EG45-like domain containing protein 2	13958	6.29893e+07	3.8101e+07	7.34972e+07	7.56311e+06	4.94637e+06	6.40106e+06	5.81958e+07	6.30351e+06	9.23229	3.20669	up	3.51363e-28	1.10295e-26	high
Jr08_21340_p1	109009742	Q06327	VIT_14s0128g00780	Linoleate 9S-lipoxygenase 1	97625	3.72497e+07	4.83073e+07	3.97226e+07	5.03138e+06	5.38548e+06	3.82253e+06	4.17599e+07	4.74646e+06	8.7981	3.13719	up	5.1228e-60	1.53498e-57	high
Jr12_13530_p1	108980860	Q9M2U5	VIT_05s0094g00260	Endochitinase EP3	29672	2.28159e+07	2.98719e+07	2.60485e+07	2.64664e+06	3.66931e+06	2.73485e+06	2.62454e+07	3.01694e+06	8.69937	3.12091	up	2.92603e-59	8.03683e-57	high
Jr09_11450_p1	108997094	P50700	VIT_02s0025g04270	Osmotin-like protein OSM34	26222	1.50322e+07	1.37772e+07	1.35229e+07	975027	2.06822e+06	1.82393e+06	1.41108e+07	1.62239e+06	8.69752	3.1206	up	1.10301e-27	3.27524e-26	high
Jr13_22960_p1	108993983	Q9SSK5	VIT_01s0011g05120	MLP-like protein 43	17729	3.18165e+07	3.29256e+07	3.11307e+07	3.54664e+06	3.94569e+06	3.56446e+06	3.19576e+07	3.68559e+06	8.67094	3.11619	up	1.38952e-133	4.57987e-130	high
Jr_Scaffold_186_00010_p1	108996763	Q8VZJ2	VIT_05s0077g01150	Probable glucan endo-1,3-beta-glucosidase At4g16260	14172	1.41619e+06	2.07034e+06	1.75265e+06	199305	244348	169188	1.74639e+06	204281	8.54899	3.09575	up	1.57874e-42	1.33424e-40	high
Jr04_07580_p1	109021913	Q9SFF9	VIT_10s0003g05250	Germin-like protein subfamily 1 member 7	22886	3.63453e+06	5.58207e+06	3.44518e+06	652854	514382	347050	4.22059e+06	504762	8.36155	3.06377	up	7.28236e-24	1.71448e-22	high
Jr09_02650_p1 (+4)	109000279	P92995	VIT_17s0000g05360	Germin-like protein subfamily T member 1	23701	4.02533e+06	4.15404e+06	3.81479e+06	418976	524185	524161	3.99805e+06	489107	8.17418	3.03107	up	9.71882e-84	8.00831e-81	high
Jr01_00800_p1	109001281	P13114	VIT_14s0068g00930	Chalcone synthase	43048	1.68552e+06	2.28499e+06	2.13557e+06	195957	299051	267142	2.03536e+06	254050	8.01165	3.0021	up	1.67815e-40	1.22915e-38	high
Jr06_16530_p1	#N/A	P59220	VIT_17s0000g00580	Calmodulin-7 (CaM-7)	16992	133081	180780	251889	27241.8	24250.4	19958.6	188583	23816.9	7.91804	2.98514	up	5.32274e-22	1.08967e-20	high
Jr10_01640_p1	109020652	Q8GYB8	VIT_18s0041g02060	12-oxophytodienoate reductase 2	39485	1.78562e+07	1.64304e+07	1.44263e+07	1.45317e+06	2.48838e+06	2.22541e+06	1.62376e+07	2.05565e+06	7.89903	2.98167	up	1.29021e-38	8.50506e-37	high
Jr12_14320_p1	108980733	O04529	VIT_14s0066g01970	Metalloendoproteinase 2-MMP (At2-MMP)	34357	1.39592e+06	1.47297e+06	1.78232e+06	142429	230888	219331	1.5504e+06	197549	7.84818	2.97236	up	1.68235e-35	7.70143e-34	high
Jr11_08740_p1	108995230	F4K5K6	VIT_14s0030g01890	Protein PLASTID MOVEMENT IMPAIRED 1-RELATED 1	25430	1.08378e+06	1.2051e+06	1.65999e+06	88324.5	216915	198851	1.31629e+06	168030	7.83367	2.96969	up	1.66478e-15	2.00994e-14	high
Jr05_10600_p1	109020236	Q9SCU0	VIT_08s0007g02700	Short-chain dehydrogenase reductase 2a (AtSDR2a)	29490	1.53841e+06	1.62253e+06	1.63242e+06	160657	212165	261961	1.59779e+06	211594	7.5512	2.9167	up	1.33822e-41	1.0758e-39	high
Jr11_30820_p1	108987667	Q93Z38	VIT_18s0157g00140	Tryptophan aminotransferase-related protein 4	50037	2.8997e+07	2.92727e+07	3.01131e+07	2.32828e+06	4.77463e+06	4.7515e+06	2.94609e+07	3.95147e+06	7.45568	2.89834	up	4.6184e-24	1.10306e-22	high
Jr06_17350_p1	108992098	Q8L8S2	VIT_16s0098g00600	Protein RESPONSE TO LOW SULFUR 4	13859	235737	351233	181190	64895.2	27497.1	13594	256053	35328.8	7.24773	2.85752	up	9.47128e-07	4.07537e-06	high
Jr12_13290_p1	109005831	Q944Z5	VIT_09s0002g05290	Probable 2-oxoglutarate-dependent dioxygenase AOP1	38639	3.42392e+07	3.69631e+07	4.03068e+07	4.98487e+06	5.42983e+06	5.02359e+06	3.71697e+07	5.1461e+06	7.22289	2.85258	up	6.79483e-102	1.11979e-98	high
Jr05_10610_p1_family	108991076	Q9SCU0	VIT_08s0007g02660	Short-chain dehydrogenase reductase 2a (AtSDR2a)	29117	4.21078e+06	4.84163e+06	4.41627e+06	781227	586332	539997	4.48956e+06	635852	7.0607	2.81981	up	4.99529e-52	8.23224e-50	high
Jr14_06080_p1	109012806	Q9SV68	VIT_07s0151g00090	Chloroplast envelope quinone oxidoreductase homolog (ceQORH)	34693	3.24062e+07	3.92848e+07	2.85414e+07	3.99285e+06	4.95037e+06	5.25498e+06	3.34108e+07	4.73273e+06	7.05951	2.81957	up	7.98099e-53	1.46141e-50	high
Jr12_09350_p1	108995889	P13114	VIT_05s0136g00260	Chalcone synthase	47319	463647	479609	972472	63240	117601	94357.4	638576	91732.8	6.96126	2.79935	up	3.05434e-13	2.81992e-12	high
Jr12_00810_p1	108985752	P43297	VIT_07s0031g00050	Cysteine proteinase RD21A	41263	3.48409e+06	3.62999e+06	3.45436e+06	475563	558370	489808	3.52281e+06	507914	6.93585	2.79407	up	2.91966e-87	3.20774e-84	high
Jr12_10770_p1	108994808	Q93VR4	VIT_05s0077g01650	MLP-like protein 423	17585	9.21068e+07	1.3077e+08	1.19559e+08	1.23796e+07	1.83271e+07	1.97725e+07	1.14145e+08	1.68264e+07	6.7837	2.76207	up	4.3948e-32	1.70415e-30	high
Jr07_24360_p1	108989435	O23320	VIT_05s0020g04420	Calmodulin-like protein 8 (AtCaM-8)	17527	203644	300448	208590	54201	31229	20144.7	237560	35191.6	6.7505	2.75499	up	9.31581e-12	7.38099e-11	high
Jr13_22930_p1	108994033	Q9SSK5	VIT_01s0011g05120	MLP-like protein 43	17207	6.63478e+06	6.53766e+06	5.10696e+06	681472	1.09712e+06	932901	6.09313e+06	903830	6.74146	2.75306	up	5.30062e-36	2.56924e-34	high
Jr12_09230_p1	109019460	P48641	VIT_05s0051g00870	Glutathione reductase, cytosolic (GR; GRase)	53722	4.18019e+07	4.19218e+07	3.88099e+07	4.94685e+06	6.97844e+06	6.34971e+06	4.08445e+07	6.09167e+06	6.70499	2.74523	up	1.97687e-60	6.51577e-58	high
Jr01_23380_p1	109019217	Q9LNJ3	VIT_12s0028g00610	Aspartyl protease family protein 2	62106	517897	620439	609765	63427.7	110077	89215.7	582700	87573.5	6.65384	2.73419	up	2.72177e-27	7.86925e-26	high
Jr01_09280_p1	108988093	Q9M8R4	VIT_04s0079g00800	Protein DJ-1 homolog D (AtDJ1D)	42155	6.51843e+06	8.82078e+06	6.52719e+06	1.01162e+06	1.17773e+06	1.22599e+06	7.2888e+06	1.13845e+06	6.4024	2.67861	up	1.4317e-51	2.24709e-49	high
Jr13_21590_p1	108989738	Q8H1H9	VIT_00s0225g00090	Primary amine oxidase	87252	55601.5	65150.1	73048	9184.66	11988	9389.04	64599.9	10187.2	6.34126	2.66475	up	5.52995e-26	1.49399e-24	high
Jr07_07890_p1	109004165	P19172	VIT_15s0046g01570	Acidic endochitinase	31277	2.05154e+06	2.61317e+06	2.75575e+06	346703	450137	391745	2.47349e+06	396195	6.24311	2.64226	up	4.931e-45	5.07893e-43	high
Jr14_13490_p1	108990104	Q9SCV4	VIT_06s0004g03020	Beta-galactosidase 8 (Lactase 8)	93356	7.44439e+06	9.65567e+06	8.82881e+06	1.4537e+06	1.48027e+06	1.27786e+06	8.64296e+06	1.40395e+06	6.15618	2.62204	up	9.69325e-66	4.56413e-63	high
Jr16_03670_p1	108984894	Q9FK25	VIT_18s0072g00920	Flavone 3'-O-methyltransferase 1 (AtOMT1)	40786	8.79253e+06	1.27632e+07	9.01394e+06	1.44519e+06	1.93738e+06	1.58631e+06	1.01899e+07	1.65629e+06	6.15222	2.62111	up	4.05362e-37	2.26453e-35	high
Jr14_07840_p1	108996989	Q9FLC0	VIT_06s0004g07770	Peroxidase 52 (Atperox P52)	37205	3.79615e+07	4.59626e+07	3.55558e+07	6.09726e+06	7.08311e+06	6.25487e+06	3.98266e+07	6.47841e+06	6.14759	2.62002	up	2.24032e-63	9.2301e-61	high
Jr02_05410_p1	108995425	Q8W471	VIT_17s0000g05870	Long-chain-fatty-acid--[acyl-carrier-protein] ligase AEE15, chloroplastic	39816	4.96379e+06	6.60408e+06	4.42814e+06	772193	1.01818e+06	820284	5.33201e+06	870219	6.1272	2.61523	up	7.90893e-37	4.19582e-35	high
Jr01_08170_p1	108988100	Q8RY22	VIT_14s0006g01570	Protease Do-like 7	122539	261126	322552	195062	41621.1	53415.7	33007.5	259580	42681.4	6.08181	2.6045	up	1.00896e-18	1.59116e-17	high
Jr15_11180_p1	108993229	Q9LVI9	VIT_17s0000g01950	Dihydropyrimidine dehydrogenase (NADP(+)), chloroplastic (DHPDH; DPD)	46358	1.14381e+07	1.24152e+07	9.43457e+06	1.38518e+06	2.31876e+06	1.81088e+06	1.1096e+07	1.83827e+06	6.03607	2.59361	up	3.54578e-31	1.34332e-29	high
Jr11_16840_p1	#N/A	P17562	VIT_07s0005g02230	S-adenosylmethionine synthase 2 (AdoMet synthase 2)	47462	2.07492e+07	2.85951e+07	2.61927e+07	4.11813e+06	4.72065e+06	3.71642e+06	2.5179e+07	4.18506e+06	6.0164	2.5889	up	6.55802e-49	9.82511e-47	high
Jr07_26710_p1	109019748	Q9SYF0	VIT_09s0002g00510	GDSL esterase/lipase 2	41228	1.01952e+07	1.3936e+07	1.21863e+07	1.91667e+06	2.60434e+06	1.55665e+06	1.21058e+07	2.02589e+06	5.97558	2.57908	up	2.70736e-29	9.0136e-28	high
Jr15_11320_p1	#N/A	P59220	VIT_17s0000g00580	Calmodulin-7 (CaM-7)	21307	778293	977795	1.40559e+06	166236	194512	176865	1.05389e+06	179204	5.88095	2.55605	up	1.31923e-24	3.22087e-23	high
Jr16_05020_p1	109007527	Q9FK25	VIT_16s0098g00850	Flavone 3'-O-methyltransferase 1 (AtOMT1)	39747	8.24748e+06	1.12473e+07	1.16333e+07	1.88172e+06	1.85603e+06	1.61695e+06	1.0376e+07	1.7849e+06	5.81322	2.53934	up	2.17912e-47	2.99266e-45	high
Jr05_15860_p1	109020930	Q9FG34	VIT_06s0004g01180	Peroxidase 54 (Atperox P54)	37684	3.0008e+07	3.18932e+07	2.94861e+07	3.27167e+06	5.73388e+06	6.8338e+06	3.04624e+07	5.27978e+06	5.76963	2.52848	up	6.84149e-21	1.25975e-19	high
Jr01_06710_p1	109005636	Q96509	VIT_14s0068g01920	Peroxidase 55 (Atperox P55)	34461	5.84021e+06	7.15385e+06	6.11599e+06	1.08295e+06	1.24953e+06	998051	6.37002e+06	1.11018e+06	5.73783	2.52051	up	1.23576e-58	3.13312e-56	high
Jr12_10760_p1	108994806	Q93VR4	VIT_05s0077g01650	MLP-like protein 423	17546	2.43809e+07	2.93201e+07	2.76212e+07	3.75906e+06	5.31196e+06	5.12784e+06	2.71074e+07	4.73295e+06	5.72738	2.51787	up	3.4807e-45	3.70077e-43	high
Jr06_07250_p1 (+1)	109010314	O48723	VIT_18s0001g10880	Patatin-like protein 2 (AtPLP2)	48024	916359	1.21353e+06	640418	257685	134589	99019.7	923435	163765	5.63879	2.49538	up	1.15485e-09	7.14146e-09	high
Jr11_12910_p1	109010910	Q9LNJ3	VIT_07s0104g00180	Aspartyl protease family protein 2	47666	7.44579e+06	1.09954e+07	6.82884e+06	1.56328e+06	1.62277e+06	1.31227e+06	8.42334e+06	1.49944e+06	5.61766	2.48997	up	1.49843e-30	5.48757e-29	high
Jr01_26820_p1	109009754	O65896	VIT_11s0016g02340	Cytidine deaminase 1 (At-CDA1)	38213	1.361e+06	1.40378e+06	1.02946e+06	210665	246192	222788	1.26475e+06	226548	5.58268	2.48096	up	1.66998e-40	1.22915e-38	high
Jr14_20670_p1	109001720	Q9LU02	VIT_13s0064g01580	Beta-glucosidase 13 (AtBGLU13)	58898	1.46866e+06	1.6232e+06	1.50796e+06	277863	332961	229220	1.53327e+06	280015	5.47569	2.45304	up	2.70229e-39	1.81771e-37	high
Jr08_10800_p1	#N/A	P17562	VIT_05s0020g00670	S-adenosylmethionine synthase 2 (AdoMet synthase 2)	43100	5.63476e+06	6.04046e+06	5.93909e+06	868133	1.29453e+06	1.08693e+06	5.87144e+06	1.0832e+06	5.42046	2.43842	up	3.34733e-43	2.90336e-41	high
Jr08_19280_p1	109022042	Q9T070	VIT_00s0386g00020	Cytochrome c oxidase subunit 6a, mitochondrial (AtCOX6a)	11288	4.01664e+06	3.2708e+06	2.57059e+06	672156	565355	587509	3.28601e+06	608340	5.4016	2.43339	up	1.27963e-33	5.40727e-32	high
Jr07_26720_p1	109019750	Q9FLN0	VIT_09s0002g00540	GDSL esterase/lipase 1	41164	2.38746e+06	2.82826e+06	2.90139e+06	411919	546950	546993	2.70571e+06	501954	5.39035	2.43038	up	1.53443e-41	1.20416e-39	high
Jr14_21400_p1	109001678	Q9C523	VIT_06s0004g00980	Dirigent protein 19 (AtDIR19)	21388	1.27292e+06	1.40214e+06	1.86156e+06	429747	230805	184388	1.51221e+06	281647	5.36916	2.4247	up	2.57631e-12	2.16621e-11	high
Jr08_07750_p1	109011808	Q9FUT0	VIT_17s0000g06140	Glutathione S-transferase U9 (AtGSTU9)	26370	6.09148e+06	5.16394e+06	6.50664e+06	853879	1.2227e+06	1.24178e+06	5.92069e+06	1.10612e+06	5.35266	2.42026	up	1.97044e-35	8.89668e-34	high
Jr16_19300_p1 (+1)	109002291	Q9ZWA9	VIT_12s0034g01870	12S seed storage protein CRD beta chain	39095	3.03272e+06	2.74407e+06	2.20151e+06	428821	612778	451106	2.65943e+06	497568	5.34486	2.41815	up	1.68531e-30	6.10416e-29	high
Jr07_07910_p1	109004164	P19172	VIT_15s0046g01570	Acidic endochitinase	31317	7.01041e+06	8.41172e+06	9.03869e+06	1.97713e+06	1.49273e+06	1.11647e+06	8.15361e+06	1.52878e+06	5.33341	2.41506	up	4.09459e-25	1.03021e-23	high
Jr07_01880_p1	109009088	Q93XX5	VIT_07s0031g00490	PI-PLC X domain-containing protein At5g67130	45163	2.51115e+06	3.27169e+06	3.37833e+06	390028	698454	635391	3.05372e+06	574624	5.3143	2.40988	up	5.44464e-21	1.01387e-19	high
Jr08_20480_p1	#N/A	O04834	VIT_07s0005g01330	GTP-binding protein SAR1A	21989	95669.3	128779	136484	16561.6	30809.1	20854.6	120311	22741.8	5.29031	2.40335	up	1.83944e-14	1.95574e-13	high
Jr13_21860_p1	108979094	Q9SGY2	VIT_01s0127g00260	ATP-citrate synthase alpha chain protein 1 (ATP-citrate synthase A-1)	46571	3.40295e+06	3.70196e+06	4.67299e+06	808782	789066	632704	3.92597e+06	743518	5.28026	2.40061	up	2.55607e-38	1.65193e-36	high
Jr07_18430_p1	108987297	Q9ZPI5	VIT_05s0077g02140	3-hydroxyacyl-CoA dehydrogenase (AtMPF2)	79212	2.59619e+07	3.08131e+07	2.3627e+07	5.96981e+06	5.09738e+06	4.16642e+06	2.68006e+07	5.07787e+06	5.27793	2.39997	up	3.02439e-38	1.917e-36	high
Jr12_10450_p1	#N/A	Q8L5V0	VIT_05s0077g01170	DNA-directed RNA polymerases II, IV and V subunit 9B	13130	77582.4	68872	93383.6	11022.7	18253.2	16432	79946	15236	5.24718	2.39153	up	8.59487e-17	1.17546e-15	high
Jr03_17510_p1	108986335	Q9SVG5	VIT_12s0028g01790	Berberine bridge enzyme-like 18 (AtBBE-like 18)	60088	2.08966e+06	2.29592e+06	2.18429e+06	201287	562288	491615	2.18996e+06	418397	5.23416	2.38796	up	6.08759e-11	4.32691e-10	high
Jr10_20780_p1	109019972	Q9ZU07	VIT_11s0016g03580	Cytochrome P450 71B12	38856	1.34651e+06	1.47753e+06	1.25563e+06	207711	340670	237845	1.35989e+06	262075	5.18892	2.37543	up	5.77946e-26	1.54871e-24	high
Jr13_00950_p1	#N/A	O49499	VIT_07s0031g00350	Caffeoyl-CoA O-methyltransferase 1	27966	1.58452e+07	1.97988e+07	2.022e+07	2.91143e+06	4.15499e+06	3.77864e+06	1.86213e+07	3.61502e+06	5.1511	2.36488	up	2.31884e-37	1.3648e-35	high
Jr11_19820_p1	#N/A	P12411	VIT_18s0001g14360	Tubulin beta-1 chain	56861	191835	294952	271927	63839.6	55747.1	28022.1	252905	49202.9	5.14003	2.36177	up	5.16864e-11	3.73593e-10	high
Jr14_10390_p1	109006466	Q9LHT0	VIT_13s0019g02180	Tropinone reductase homolog At5g06060	28023	3.17839e+07	3.66602e+07	3.28641e+07	5.41822e+06	7.51601e+06	6.87471e+06	3.37694e+07	6.60298e+06	5.11426	2.35453	up	7.23202e-46	8.82843e-44	high
Jr03_21770_p1 (+2)	108989076	Q93YN1	VIT_08s0040g01930	Cold-responsive protein kinase 1	41033	276318	380363	468334	101208	66358.2	52552.4	375005	73372.8	5.11096	2.35359	up	5.6817e-13	5.09916e-12	high
Jr04_21180_p1	109013554	Q9SCU0	VIT_08s0007g02720	Short-chain dehydrogenase reductase 2a (AtSDR2a)	29099	1.14795e+08	1.28448e+08	1.22534e+08	1.99608e+07	2.79388e+07	2.71335e+07	1.21926e+08	2.5011e+07	4.87488	2.28537	up	2.44668e-40	1.7531e-38	high
Jr13_05720_p1	109007006	P19171	VIT_04s0008g00120	Basic endochitinase B	35047	7.7806e+07	1.04305e+08	8.41414e+07	1.8613e+07	2.06526e+07	1.56233e+07	8.87507e+07	1.82963e+07	4.85075	2.27821	up	3.32182e-37	1.88771e-35	high
Jr15_05650_p1	108992311	Q9T076	VIT_18s0001g11180	Early nodulin-like protein 2	16347	593907	799550	723873	165908	142313	133290	705777	147170	4.79565	2.26172	up	7.53207e-31	2.8211e-29	high
Jr07_18110_p1	108984929	Q93VR4	VIT_05s0077g01690	MLP-like protein 423	17754	1.92051e+07	2.62771e+07	2.25067e+07	4.56095e+06	4.46012e+06	5.1698e+06	2.26629e+07	4.73029e+06	4.79103	2.26033	up	1.09649e-44	1.09516e-42	high
Jr16_17360_p1	109005735	P43296	VIT_03s0038g00280	Cysteine protease RD19A	41923	1.05375e+06	868185	826161	54299.5	265075	254419	916031	191264	4.78934	2.25983	up	2.92902e-05	9.85106e-05	high
Jr01_24700_p1 (+1)	109011451	Q96252	VIT_15s0021g00920	ATP synthase subunit delta', mitochondrial	21267	1.86547e+07	1.33593e+07	1.33068e+07	2.64401e+06	2.56685e+06	4.36119e+06	1.51069e+07	3.19068e+06	4.7347	2.24327	up	6.18823e-18	9.14637e-17	high
Jr07_18040_p1	109021896	Q93VR4	VIT_05s0077g01650	MLP-like protein 423	17346	1.02621e+08	1.38424e+08	1.29033e+08	1.88847e+07	2.85138e+07	3.07689e+07	1.23359e+08	2.60558e+07	4.73443	2.24319	up	5.21477e-23	1.14586e-21	high
Jr13_03840_p1 (+1)	109007351	Q9T0F3	VIT_03s0017g00690	Immune-associated nucleotide-binding protein 12 (AtIAN12)	25033	1.63155e+06	1.82364e+06	1.25948e+06	269763	405449	328249	1.57156e+06	334487	4.69842	2.23217	up	3.68561e-23	8.20796e-22	high
Jr09_03600_p1	109003875	Q02166	VIT_17s0000g08660	Anthranilate phosphoribosyltransferase, chloroplastic	42528	381979	532469	531704	119874	102300	87931.7	482051	103368	4.66343	2.22139	up	2.40029e-22	5.05485e-21	high
Jr07_21660_p1	108980780	Q9M2U5	VIT_05s0094g00220	Endochitinase EP3	32163	9.14647e+06	1.19207e+07	9.77857e+06	2.27037e+06	2.5041e+06	1.85024e+06	1.02819e+07	2.20824e+06	4.65616	2.21914	up	6.88884e-37	3.72223e-35	high
Jr06_02220_p1 (+1)	109005396	Q9LXC0	VIT_18s0001g15660	Guanosine nucleotide diphosphate dissociation inhibitor At5g09550 (AtGDI)	27174	6.53685e+07	6.99824e+07	7.31216e+07	1.31615e+07	1.63405e+07	1.54611e+07	6.94908e+07	1.49877e+07	4.63653	2.21304	up	1.59503e-54	3.09249e-52	high
Jr03_24460_p1 (+1)	109006089	O48723	VIT_18s0001g10910	Patatin-like protein 2 (AtPLP2)	43178	9.96667e+06	1.15631e+07	7.14699e+06	2.8676e+06	1.85662e+06	1.48678e+06	9.55893e+06	2.07033e+06	4.6171	2.20699	up	3.4286e-14	3.47713e-13	high
Jr07_12520_p1 (+2)	#N/A	Q9LUT2	VIT_05s0020g00670	S-adenosylmethionine synthase 4 (AdoMet synthase 4)	43016	1.08204e+07	1.44219e+07	1.33907e+07	2.97375e+06	2.91944e+06	2.57451e+06	1.28777e+07	2.82257e+06	4.5624	2.18979	up	1.2828e-44	1.24357e-42	high
Jr16_21330_p1	108989203	Q9C7Z9	VIT_03s0088g00260	Serine carboxypeptidase-like 18	53163	1.32584e+06	1.56041e+06	1.69176e+06	340846	361283	312029	1.52601e+06	338053	4.5141	2.17444	up	1.41949e-39	9.74714e-38	high
Jr11_17520_p1	109007750	Q8GYX8	VIT_18s0122g00050	Chaperone protein dnaJ 10 (AtDjC10; AtJ10)	46055	193813	224377	227961	33744.5	54576.5	54892.7	215384	47737.9	4.5118	2.1737	up	1.27524e-16	1.69483e-15	high
Jr07_26730_p1	108989069	Q9FLN0	VIT_09s0002g00510	GDSL esterase/lipase 1	41292	1.37827e+06	1.7529e+06	1.5356e+06	301184	393156	349403	1.55559e+06	347914	4.47118	2.16065	up	1.11912e-33	4.7904e-32	high
Jr11_30810_p1	108987666	Q93Z38	VIT_18s0157g00140	Tryptophan aminotransferase-related protein 4	51138	448160	469425	537646	148285	111780	71157.2	485077	110407	4.39352	2.13537	up	2.79799e-13	2.5978e-12	high
Jr02_24660_p1 (+1)	108984384	O65390	VIT_19s0090g00830	Aspartic proteinase A1	56120	2.05569e+07	2.3167e+07	2.26957e+07	4.34177e+06	5.74582e+06	5.06261e+06	2.21399e+07	5.05007e+06	4.38407	2.13227	up	1.9594e-45	2.23473e-43	high
Jr13_06430_p1	109010224	P92997	VIT_14s0128g00920	Germin-like protein subfamily 1 member 13	23986	3.7763e+06	3.82476e+06	3.15321e+06	715074	945012	806146	3.58476e+06	822077	4.36061	2.12453	up	8.01991e-37	4.19582e-35	high
Jr16_22100_p1	108999180	O49499	VIT_07s0031g00350	Caffeoyl-CoA O-methyltransferase 1	27820	1.91152e+07	2.14663e+07	2.58083e+07	3.80278e+06	5.54033e+06	5.91521e+06	2.21299e+07	5.08611e+06	4.35105	2.12136	up	1.48212e-23	3.36901e-22	high
Jr07_26700_p1	109019746	Q9SYF0	VIT_09s0002g00510	GDSL esterase/lipase 2	45465	1.95686e+06	2.41504e+06	1.82015e+06	426165	597294	411827	2.06402e+06	478429	4.31416	2.10908	up	1.79483e-23	4.02433e-22	high
Jr13_24940_p1 (+1)	108991299	Q9SSK5	VIT_01s0011g05120	MLP-like protein 43	17596	5.65426e+07	4.90264e+07	5.53097e+07	1.35364e+07	1.34865e+07	1.03581e+07	5.36263e+07	1.24604e+07	4.30375	2.10559	up	5.40728e-40	3.792e-38	high
Jr08_02830_p1 (+1)	108988731	O81126	VIT_04s0069g00800	Serine/arginine-rich splicing factor RSZ22	24051	2.96807e+06	3.15746e+06	2.44214e+06	851388	646513	494096	2.85589e+06	663999	4.30105	2.10469	up	1.13773e-19	1.97367e-18	high
Jr14_02780_p1	109008032	Q9FNX5	VIT_15s0021g00480	Dynamin-related protein 1E	68811	475991	523485	852241	65647.4	177509	189384	617239	144180	4.28102	2.09795	up	1.60647e-06	6.71092e-06	high
Jr13_24980_p1	108999402	Q84UU4	VIT_19s0014g04930	Alpha-humulene/(-)-(E)-beta-caryophyllene synthase	64840	6.2223e+06	4.06596e+06	4.28871e+06	562164	1.43878e+06	1.42121e+06	4.85899e+06	1.14072e+06	4.25958	2.09071	up	2.64253e-08	1.40707e-07	high
Jr12_08540_p1 (+1)	108983210	Q9ASZ9	VIT_05s0062g00980	Probable aldo-keto reductase 5	37992	2.99385e+06	3.7928e+06	2.46969e+06	528857	826211	829387	3.08545e+06	728152	4.23737	2.08317	up	2.93944e-17	4.1581e-16	high
Jr10_05460_p1	109012425	Q8VYG0	VIT_14s0006g02600	LEAF RUST 10 DISEASE-RESISTANCE LOCUS RECEPTOR-LIKE PROTEIN KINASE-like 1.3	76325	780419	1.201e+06	796145	270877	199492	185392	925856	218587	4.23563	2.08258	up	1.35822e-16	1.79068e-15	high
Jr11_09370_p1	108995213	P43082	VIT_14s0081g00050	CD-HEL	22136	153525	189492	164445	12744.3	55496.7	52006.3	169154	40082.4	4.22016	2.07729	up	5.9267e-05	0.000188087	high
Jr02_05690_p1	108995469	Q9FUT0	VIT_17s0000g06140	Glutathione S-transferase U9 (AtGSTU9)	26775	1.29951e+07	1.30796e+07	1.47531e+07	2.39157e+06	3.66804e+06	3.63779e+06	1.36093e+07	3.23247e+06	4.21018	2.07388	up	2.67691e-26	7.47719e-25	high
Jr13_13030_p1 (+1)	109019734	O82514	VIT_01s0010g02770	Adenylate kinase 4 (AK 4)	26832	9.31728e+06	9.29529e+06	8.96955e+06	1.46129e+06	2.48968e+06	2.64517e+06	9.19404e+06	2.19871e+06	4.18156	2.06404	up	5.87336e-19	9.4895e-18	high
Jr05_10540_p1_family	109021539	Q9SCU0	VIT_08s0007g02660	Short-chain dehydrogenase reductase 2a (AtSDR2a)	29374	678554	928956	764338	251197	177951	144566	790616	191238	4.1342	2.04761	up	9.01716e-16	1.12153e-14	high
Jr01_18300_p1	109006073	Q06588	VIT_12s0059g01380	1-aminocyclopropane-1-carboxylate oxidase 4 (ACC oxidase)	36603	2.50662e+06	2.95564e+06	2.69534e+06	691340	744194	558256	2.7192e+06	664597	4.0915	2.03263	up	4.87841e-34	2.11569e-32	high
Jr10_11790_p1	109004613	Q8VZA1	VIT_07s0031g01040	Laccase-11	65991	1.71314e+06	1.89783e+06	1.74555e+06	258076	526632	525394	1.7855e+06	436701	4.08862	2.03161	up	1.3832e-12	1.19659e-11	high
Jr12_15310_p1	109005096	Q9LIK9	VIT_05s0020g04210	ATP sulfurylase 1, chloroplastic (AtPS1)	52206	3.21793e+06	2.25727e+06	3.36437e+06	909808	705514	553904	2.94653e+06	723075	4.07499	2.0268	up	1.09178e-16	1.46878e-15	high
Jr16_21320_p1	109019834	Q9C7Z9	VIT_03s0088g00110	Serine carboxypeptidase-like 18	51547	298824	351163	382277	131756	69731	53248.9	344088	84911.9	4.05229	2.01874	up	1.59258e-08	8.6763e-08	high
Jr10_09870_p1	108985511	P51419	VIT_01s0011g01820	60S ribosomal protein L27-3	15678	74471.3	94828.5	259880	22084.7	49207	35825.6	143060	35705.7	4.00664	2.00239	up	0.000190714	0.000547077	high
Jr07_19410_p1 (+2)	108995064	Q9SQT8	VIT_05s0020g02030	Shikimate dehydrogenase	56494	112629	142542	115568	30414.5	34587.5	27898.5	123580	30966.8	3.99072	1.99664	up	1.5299e-18	2.38984e-17	high
Jr13_26330_p1	108988317	Q9LIN2	VIT_14s0128g00520	GDSL esterase/lipase At3g26430	42505	4.27231e+06	4.33456e+06	4.03277e+06	843804	1.26326e+06	1.0658e+06	4.21321e+06	1.05762e+06	3.98366	1.9941	up	3.45731e-29	1.13953e-27	high
Jr03_01590_p1	108981116	Q9SJM7	VIT_08s0007g03690	Uridine nucleosidase 1	36872	1.32541e+06	1.17182e+06	1.14238e+06	163586	401672	348855	1.2132e+06	304704	3.98157	1.99334	up	1.25923e-09	7.7433e-09	high
Jr14_06850_p1	108992927	O22822	VIT_07s0151g00540	UDP-glycosyltransferase 74F2	52740	21452.6	37110.7	34712.3	6876.85	9643.8	6961.62	31091.9	7827.42	3.97217	1.98991	up	1.40937e-10	9.67767e-10	high
Jr15_09460_p1	108994583	Q84M92	VIT_17s0000g04010	Actin-related protein 4	48997	170595	146192	305066	65853.2	50675.6	41463.7	207284	52664.2	3.93597	1.97672	up	1.31759e-08	7.23796e-08	high
Jr06_13950_p1 (+1)	109005619	Q9LS40	VIT_17s0000g03990	Protein ASPARTIC PROTEASE IN GUARD CELL 1 (AtASPG1)	58806	1.47561e+06	1.8023e+06	2.0532e+06	497127	499079	359455	1.77704e+06	451887	3.93249	1.97544	up	1.59394e-21	3.12716e-20	high
Jr12_01230_p1	109018973	Q9SCS3	VIT_00s0577g00020	Phosphoglycerate mutase-like protein 4	25190	36377.5	66484.1	48604.1	15845.4	13778.8	9116.65	50488.6	12913.6	3.90971	1.96705	up	5.06393e-09	2.89769e-08	high
Jr13_17180_p1	109019839	O81127	VIT_01s0026g00250	Serine/arginine-rich splicing factor RSZ21	20367	272620	279541	277275	58991.6	78300.5	75949.5	276479	71080.5	3.88966	1.95964	up	1.17986e-21	2.35686e-20	high
Jr14_07880_p1	108996920	Q9FLC0	VIT_18s0001g06850	Peroxidase 52 (Atperox P52)	34205	371529	465712	607249	133107	114851	123470	481497	123809	3.88902	1.9594	up	2.69914e-17	3.83464e-16	high
Jr13_05000_p1	109007059	P43255	VIT_12s0055g00390	COP9 signalosome complex subunit 8 (CSN complex subunit 8)	22487	739730	822745	731189	180584	222793	191730	764555	198369	3.85421	1.94643	up	1.46562e-30	5.42774e-29	high
Jr09_14690_p1	#N/A	Q9LSQ5	VIT_19s0014g04660	NAD(P)H dehydrogenase (quinone) FQR1	21677	3.18329e+06	3.13032e+06	2.98979e+06	700758	718091	995433	3.10113e+06	804760	3.85349	1.94616	up	1.64536e-27	4.84206e-26	high
Jr07_31260_p1 (+3)	108998334	Q9SK27	VIT_09s0002g06900	Early nodulin-like protein 1	21754	59669.2	62861.5	65510.9	22642.3	16903.7	9413.49	62680.5	16319.9	3.84075	1.94138	up	2.1972e-08	1.18224e-07	high
Jr12_19000_p1	109019206	Q0WVL7	VIT_16s0098g00540	Golgin candidate 5 (AtGC5)	114456	11020.8	29673.7	10590.9	6305.45	4611.66	2442.67	17095.1	4453.26	3.83879	1.94062	up	0.000248492	0.000697048	high
Jr15_10170_p1 (+1)	109003473	Q9SR36	VIT_17s0000g02950	Glutathione S-transferase U8 (AtGSTU8)	25895	2.90347e+07	2.53126e+07	2.41276e+07	5.72955e+06	6.50843e+06	8.28994e+06	2.61583e+07	6.84264e+06	3.82284	1.93464	up	5.84674e-28	1.80101e-26	high
Jr14_18110_p1	109000614	Q9LHN8	VIT_06s0004g00760	Feruloyl CoA ortho-hydroxylase 1	39993	3.33335e+06	4.48552e+06	3.64445e+06	1.20972e+06	971348	842949	3.82111e+06	1.008e+06	3.79076	1.92249	up	5.97805e-23	1.30488e-21	high
Jr16_20050_p1 (+1)	109003241	Q9C639	VIT_12s0055g01110	Photosystem I chlorophyll a/b-binding protein 5, chloroplastic (Lhca5)	27666	658954	437226	318838	101404	114348	159760	471673	125171	3.76824	1.91389	up	2.88269e-09	1.71505e-08	high
Jr09_13820_p1 (+1)	108992603	Q9XI23	VIT_10s0003g00530	Boron transporter 4	18481	123292	342184	189194	61049	68207.7	46376.1	218223	58544.3	3.72749	1.8982	up	1.56477e-06	6.56169e-06	high
Jr03_09850_p1	109020091	Q41932	VIT_00s0904g00010	Oxygen-evolving enhancer protein 3-2, chloroplastic (OEE3)	24869	2.6069e+08	1.37786e+08	1.60373e+08	3.4429e+07	3.5939e+07	7.96596e+07	1.86283e+08	5.00092e+07	3.72498	1.89723	up	1.66213e-06	6.91716e-06	high
Jr11_06780_p1 (+4)	108993530	Q8VZ56	VIT_03s0063g00400	Alpha-amylase 1 (AtAMY1)	46918	2.62916e+07	3.0727e+07	3.17127e+07	7.00686e+06	9.81471e+06	7.16771e+06	2.95771e+07	7.99643e+06	3.69879	1.88705	up	2.94554e-26	8.13442e-25	high
Jr13_06470_p1	109010241	P92997	VIT_16s0013g00010	Germin-like protein subfamily 1 member 13	24317	1.64517e+06	2.25466e+06	2.07906e+06	496440	587923	539635	1.99297e+06	541333	3.68159	1.88033	up	6.01276e-27	1.70845e-25	high
Jr07_07930_p1	109004163	P19172	VIT_15s0046g01570	Acidic endochitinase	31356	2.06176e+06	2.59622e+06	2.20248e+06	771052	574000	521342	2.28682e+06	622131	3.67578	1.87805	up	4.80445e-21	9.04883e-20	high
Jr09_06450_p1 (+1)	108991575	Q8LB10	VIT_00s0204g00220	ATP-dependent Clp protease proteolytic subunit-related protein 4, chloroplastic (ClpR4)	32791	626780	651216	795734	84314.8	242216	237865	691243	188132	3.67425	1.87745	up	2.0747e-06	8.45267e-06	high
Jr05_10660_p1	108998426	Q94K41	VIT_08s0007g02700	Short-chain dehydrogenase reductase 3b (AtSDR3b)	31857	2.00277e+07	2.56614e+07	2.25477e+07	5.70696e+06	6.67129e+06	6.3487e+06	2.27456e+07	6.24232e+06	3.64377	1.86543	up	5.46094e-37	2.99988e-35	high
Jr11_23590_p1_family	108980630	P29976	VIT_18s0001g06250	Phospho-2-dehydro-3-deoxyheptonate aldolase 1, chloroplastic	60037	4.75148e+06	5.6326e+06	6.4004e+06	1.33608e+06	1.83434e+06	1.44705e+06	5.59483e+06	1.53916e+06	3.635	1.86195	up	2.84071e-24	6.83429e-23	high
Jr15_01030_p1	109010267	Q96520	VIT_18s0072g00160	Peroxidase 12 (Atperox P12)	38580	4.6701e+08	5.05304e+08	4.48745e+08	1.19547e+08	1.4158e+08	1.32784e+08	4.73686e+08	1.31304e+08	3.60756	1.85102	up	3.67682e-41	2.81833e-39	high
Jr02_18740_p1	108990693	P54873	VIT_02s0025g04580	Hydroxymethylglutaryl-CoA synthase (HMG-CoA synthase)	51928	1.27099e+06	1.6285e+06	1.45056e+06	526869	387147	297029	1.45002e+06	403682	3.59199	1.84478	up	1.70668e-14	1.82637e-13	high
Jr03_02830_p1	109003076	Q9AST8	VIT_08s0032g01020	MD-2-related lipid-recognition protein ROSY1	16578	8.22989e+06	9.53133e+06	9.45051e+06	2.41418e+06	2.76347e+06	2.44e+06	9.07058e+06	2.53922e+06	3.57219	1.83681	up	8.20544e-44	7.3095e-42	high
Jr10_06890_p1	109019461	F4IBB2	VIT_07s0151g00010	Phosphoglycerate mutase-like protein 2	13487	1.48186e+06	1.84952e+06	1.75397e+06	468046	415988	545213	1.69512e+06	476416	3.55806	1.83109	up	9.14656e-26	2.39927e-24	high
Jr01_14540_p1	#N/A	F4HRS2	VIT_09s0002g01610	Protein SWEETIE	43554	5.36034e+06	6.47914e+06	4.83134e+06	1.41937e+06	1.67997e+06	1.59173e+06	5.55694e+06	1.56369e+06	3.55374	1.82934	up	1.90525e-30	6.82577e-29	high
Jr06_14000_p1	109010742	Q9LS42	VIT_17s0000g03970	Protein CASP	79219	66330.2	39574.1	60169.4	3523.13	21132.1	22498.3	55357.9	15717.9	3.52197	1.81638	up	0.00417224	0.00903528	high
Jr13_26340_p1	108988315	Q9LIN2	VIT_14s0128g00520	GDSL esterase/lipase At3g26430	42784	164772	209506	154657	44349	56598.5	49500.1	176312	50149.2	3.51575	1.81383	up	3.06841e-15	3.58634e-14	high
Jr06_18200_p1	108989525	Q949Q7	VIT_11s0037g00740	Serine carboxypeptidase-like 29	52933	5.01013e+06	5.4061e+06	5.18075e+06	1.16745e+06	1.62981e+06	1.66344e+06	5.19899e+06	1.4869e+06	3.49653	1.80593	up	6.5368e-26	1.73752e-24	high
Jr04_18250_p1	109004543	Q9LFD1	VIT_08s0007g05580	Laccase-9	30040	86564.2	130146	128217	28170.5	33799	37919.6	114976	33296.4	3.45311	1.78789	up	9.23076e-12	7.33123e-11	high
Jr08_16430_p1 (+2)	108984634	O23360	VIT_14s0030g01890	Putative F-box/LRR-repeat protein At4g15060	22775	665164	1.08809e+06	766335	395433	185315	152073	839863	244273	3.43821	1.78166	up	5.99277e-06	2.26453e-05	high
Jr06_01680_p1	109011407	Q6NPF9	VIT_18s0072g00400	Thioredoxin Y1, chloroplastic (AtTrxy1)	18365	1.22088e+06	1.83236e+06	1.02431e+06	662772	243858	279718	1.35918e+06	395449	3.43706	1.78117	up	2.76673e-05	9.33382e-05	high
Jr01_25280_p1	109008520	Q8RWQ9	VIT_11s0016g01070	Thiol protease aleurain-like	43134	2.38531e+07	2.83908e+07	2.46004e+07	7.60281e+06	7.7631e+06	7.00992e+06	2.56148e+07	7.45861e+06	3.43426	1.78	up	1.26214e-41	1.04e-39	high
Jr14_05080_p1	109002171	O04420	VIT_13s0073g00250	Uricase	35659	9.64137e+06	1.11813e+07	1.0457e+07	2.39682e+06	3.60763e+06	3.11449e+06	1.04265e+07	3.03964e+06	3.43019	1.77829	up	1.39165e-23	3.18532e-22	high
Jr07_17030_p1 (+1)	108980142	O22850	VIT_05s0102g00120	Probable glutathione peroxidase 3, mitochondrial	22606	2.18181e+07	2.56979e+07	2.58669e+07	5.30872e+06	8.12428e+06	7.96107e+06	2.4461e+07	7.13136e+06	3.43006	1.77823	up	1.25723e-19	2.16954e-18	high
Jr05_02000_p1	108989611	Q9SIU0	VIT_15s0021g00500	NAD-dependent malic enzyme 1, mitochondrial (AtNAD-ME1; NAD-malic enzyme 1)	70286	96225.2	103510	100326	19161.7	42191.3	26331.7	100020	29228.2	3.42204	1.77485	up	4.28614e-08	2.23177e-07	high
Jr09_04100_p1	108986725	Q94A08	VIT_17s0000g09670	Probable galactinol--sucrose galactosyltransferase 2	83813	37748.7	56142.7	49852.3	8123.85	18086.1	15870.9	47914.5	14026.9	3.41589	1.77225	up	6.80296e-07	2.95812e-06	high
Jr11_26590_p1	109009468	Q9XGZ0	VIT_04s0008g00180	NADP-dependent malic enzyme 3 (AtNADP-ME3; NADP-malic enzyme 3)	63571	5.48141e+06	6.55418e+06	6.42972e+06	1.49032e+06	2.05236e+06	1.8973e+06	6.15511e+06	1.81333e+06	3.39437	1.76314	up	2.96156e-26	8.13442e-25	high
Jr10_22630_p1	108982177	Q9LHS0	VIT_11s0016g05900	Putative clathrin assembly protein At5g35200	60882	203425	240962	216288	95406.1	59750.4	40099.8	220225	65085.4	3.38363	1.75857	up	1.44676e-07	7.09596e-07	high
Jr12_21910_p1_family	#N/A	P45724	VIT_13s0019g04460	Phenylalanine ammonia-lyase 2	78028	1.16956e+06	1.51297e+06	1.52338e+06	413342	434533	395566	1.40197e+06	414480	3.38248	1.75808	up	9.17196e-26	2.39927e-24	high
Jr04_05230_p1	108990545	Q8GXE6	VIT_08s0007g04760	Potassium channel AKT6	21686	220443	304221	292592	68265	89507.1	84153.7	272419	80641.9	3.37813	1.75622	up	1.15714e-14	1.26709e-13	high
Jr01_14030_p1	108996333	Q8RX26	VIT_04s0044g01620	E3 ubiquitin-protein ligase RGLG3	46114	2.39284e+06	2.73652e+06	2.2629e+06	940273	672231	582801	2.46409e+06	731769	3.3673	1.75159	up	1.51305e-16	1.97115e-15	high
Jr12_12910_p1	109005850	P0DO00	VIT_05s0020g03280	Primary amine oxidase 2	76690	6.76374e+06	8.10292e+06	7.92379e+06	2.3003e+06	2.4281e+06	2.04458e+06	7.59682e+06	2.25766e+06	3.36491	1.75057	up	3.24143e-36	1.59459e-34	high
Jr14_03780_p1	109016048	O81304	VIT_15s0021g02260	Probable plastid-lipid-associated protein 11, chloroplastic	24071	77427.7	117982	129188	36983.1	29380.5	30489.3	108199	32284.3	3.35146	1.74478	up	1.58328e-10	1.08043e-09	high
Jr07_08040_p1	#N/A	Q0WQD2	VIT_15s0046g01500	Probable galacturonosyltransferase 3	16344	291435	352593	373428	91468.1	116951	95658.8	339152	101359	3.34604	1.74245	up	5.61951e-17	7.81515e-16	high
Jr03_14510_p1 (+1)	109018714	O64748	VIT_10s0003g03380	Coatomer subunit epsilon-2	24981	23380.1	29087.3	62373.5	4055.96	16424.8	13951.1	38280.3	11477.3	3.33531	1.73781	up	0.00311868	0.0069034	high
Jr11_02770_p1	109008077	Q06327	VIT_14s0128g00780	Linoleate 9S-lipoxygenase 1	108172	1.62869e+06	1.41708e+06	1.43476e+06	260616	594912	490620	1.49351e+06	448716	3.32841	1.73483	up	6.95428e-09	3.91817e-08	high
Jr14_04490_p1	109014902	F4I893	VIT_13s0074g00340	Protein ILITYHIA	22379	83428.4	111417	73367.6	30161.2	22948	27544.3	89404.5	26884.5	3.3255	1.73357	up	2.27286e-11	1.74623e-10	high
Jr14_11960_p1	108990987	Q9FN89	VIT_06s0004g04080	GTP cyclohydrolase-2 (DHBP synthase)	56805	9916.4	7901.54	6469.78	1258.92	3017.58	3037.78	8095.9	2438.09	3.32059	1.73139	up	1.31273e-05	4.68265e-05	high
Jr07_06890_p1	109021531	Q9S757	VIT_15s0046g02300	Bifunctional L-3-cyanoalanine synthase/cysteine synthase C1, mitochondrial	40520	1.90384e+07	2.184e+07	2.29332e+07	5.95298e+06	6.68322e+06	6.67215e+06	2.12705e+07	6.43612e+06	3.30487	1.72459	up	7.13801e-38	4.35683e-36	high
Jr15_05310_p1_family	108992346	O48723	VIT_18s0001g10910	Patatin-like protein 2 (AtPLP2)	45181	8.8507e+06	1.14691e+07	8.60973e+06	2.54844e+06	3.05753e+06	3.20122e+06	9.64318e+06	2.93573e+06	3.28476	1.71579	up	2.79513e-24	6.77409e-23	high
Jr03_24640_p1	108979275	F4IBB2	VIT_08s0007g01360	Phosphoglycerate mutase-like protein 2	17025	19782.2	9556.17	14235.2	1617.37	6320.68	5336.72	14524.5	4424.92	3.28244	1.71474	up	0.00119302	0.00291057	high
Jr08_18520_p1	108979908	Q940V3	VIT_00s0218g00150	UDP-glycosyltransferase 91A1	53742	1.27291e+06	1.65481e+06	1.37781e+06	592378	387237	336308	1.43518e+06	438641	3.27188	1.71012	up	5.30523e-12	4.34976e-11	high
Jr05_04140_p1	109012599	P28493	VIT_08s0007g04650	Pathogenesis-related protein 5 (PR-5)	29243	4.33555e+06	5.48035e+06	5.41239e+06	1.43551e+06	1.64147e+06	1.59801e+06	5.0761e+06	1.55833e+06	3.25739	1.70372	up	4.30127e-30	1.50819e-28	high
Jr05_03570_p1	108990800	O22149	VIT_15s0048g00510	Pectinesterase 17	60652	731652	401920	706241	138432	200295	232106	613271	190278	3.22303	1.68842	up	2.96986e-08	1.57121e-07	high
Jr15_03550_p1_family	109008852	Q39119	VIT_04s0008g00720	Vacuolar-processing enzyme gamma-isozyme	54552	2.0817e+06	2.19706e+06	2.17662e+06	657888	706931	646124	2.15179e+06	670314	3.21012	1.68263	up	1.25719e-36	6.37494e-35	high
Jr04_12380_p1	109003627	Q09152	VIT_19s0015g01010	Farnesyl pyrophosphate synthase 1, mitochondrial (FPP synthase 1; FPS 1)	39528	5.78379e+06	7.21986e+06	7.22245e+06	1.96986e+06	2.30171e+06	2.03275e+06	6.74203e+06	2.10144e+06	3.2083	1.68181	up	4.09303e-30	1.45061e-28	high
Jr13_01010_p1	108988871	O23193	VIT_07s0031g00200	CBS domain-containing protein CBSX1, chloroplastic	25765	1.30089e+07	1.20565e+07	1.06292e+07	3.72186e+06	3.47936e+06	3.93344e+06	1.18982e+07	3.71156e+06	3.20572	1.68065	up	5.56396e-36	2.6578e-34	high
Jr11_09220_p1	108995815	B9DGI8	VIT_14s0030g02200	Basic leucine zipper 63 (AtbZIP63; bZIP protein 63)	50843	294168	352516	251293	73636	112420	95806.5	299326	93954.2	3.18587	1.67169	up	8.24075e-12	6.60864e-11	high
Jr09_09440_p1	108993785	Q9M0N1	VIT_02s0025g02340	Plant UBX domain-containing protein 10 (PUX10)	52074	388027	570640	417928	215525	110232	106547	458865	144101	3.18432	1.67098	up	4.76759e-07	2.11494e-06	high
Jr06_05400_p1	109001202	Q8LFD5	VIT_18s0001g06610	Uncharacterized protein At4g13230	23323	2.31423e+07	2.34292e+07	2.06326e+07	6.21201e+06	7.29914e+06	7.65624e+06	2.24013e+07	7.05579e+06	3.17489	1.66671	up	2.84329e-33	1.17144e-31	high
Jr13_04550_p1	109007089	Q9C639	VIT_12s0055g01110	Photosystem I chlorophyll a/b-binding protein 5, chloroplastic (Lhca5)	27265	263430	199739	204812	72435.7	60244.6	78287.9	222661	70322.7	3.16627	1.66278	up	1.15075e-13	1.10903e-12	high
Jr08_14170_p1	#N/A	O23320	VIT_00s0179g00280	Calmodulin-like protein 8 (AtCaM-8)	16997	83764.8	112866	81821.7	28568.4	30827.8	28585.2	92817.4	29327.2	3.16489	1.66215	up	1.07715e-12	9.39231e-12	high
Jr05_15960_p1	109021134	Q9C891	VIT_06s0004g00980	Dirigent protein 20 (AtDIR20)	21493	2.98819e+06	3.14733e+06	3.94864e+06	973939	1.1787e+06	1.04513e+06	3.36139e+06	1.06592e+06	3.15349	1.65695	up	1.77275e-23	4.00205e-22	high
Jr08_08410_p1_family	109010590	Q43870	VIT_18s0001g14010	ATP sulfurylase 2	54148	1.51263e+07	1.69425e+07	1.36228e+07	4.65465e+06	5.15776e+06	4.82235e+06	1.52305e+07	4.87825e+06	3.12212	1.64253	up	3.99187e-34	1.75429e-32	high
Jr06_05440_p1	109001199	O82081	VIT_18s0001g06580	Uclacyanin 1	19661	2.18002e+06	2.96563e+06	3.03775e+06	621741	983087	1.02439e+06	2.7278e+06	876405	3.11249	1.63807	up	8.86432e-12	7.07428e-11	high
Jr01_17670_p1	109006027	O48845	VIT_07s0005g06290	Cytochrome b5 isoform B (AtCb5-B)	14840	1.80019e+06	1.75992e+06	1.98486e+06	494979	598727	689816	1.84832e+06	594507	3.10899	1.63645	up	1.93947e-21	3.76029e-20	high
Jr10_06100_p1	#N/A	Q56WN1	VIT_14s0006g00350	Glutamine synthetase cytosolic isozyme 1-1	39228	5.80875e+07	6.3186e+07	6.13742e+07	1.78814e+07	1.99398e+07	2.09472e+07	6.08826e+07	1.95895e+07	3.10792	1.63595	up	3.15539e-37	1.82459e-35	high
Jr11_04100_p1	#N/A	O04834	VIT_07s0005g01330	GTP-binding protein SAR1A	28853	25840.1	21951	34647.5	6307.1	9346.03	10875.8	27479.5	8842.98	3.10749	1.63574	up	1.60792e-07	7.78224e-07	high
Jr13_03500_p1	108983905	Q8S944	VIT_03s0038g00970	Dynamin-related protein 3A	91309	13760	9456.36	10598.4	3916.89	2962.98	4105.44	11271.6	3661.77	3.07818	1.62205	up	3.35805e-09	1.96592e-08	high
Jr04_04040_p1 (+1)	109012824	O82628	VIT_08s0040g01910	V-type proton ATPase subunit G1 (V-ATPase subunit G1)	12317	2.22445e+06	1.86326e+06	1.74266e+06	478892	607548	814526	1.94346e+06	633656	3.06706	1.61686	up	1.15242e-12	1.00221e-11	high
Jr08_04390_p1 (+1)	109014492	C0LGH2	VIT_11s0103g00580	Probable LRR receptor-like serine/threonine-protein kinase At1g56130	33550	47149.8	52317.2	45802.5	13111.3	18324.2	16028.7	48423.2	15821.4	3.06061	1.61381	up	1.2017e-11	9.49829e-11	high
Jr10_02870_p1 (+1)	108997152	Q8LC79	VIT_14s0066g01920	GATA transcription factor 18	23651	1.13646e+06	1.06993e+06	1.1178e+06	278700	394241	415709	1.10806e+06	362883	3.0535	1.61046	up	8.77609e-17	1.19529e-15	high
Jr06_05650_p1	109001182	Q9STX2	VIT_18s0001g09420	3-oxo-Delta(4,5)-steroid 5-beta-reductase	44373	2.7274e+06	3.10805e+06	3.71748e+06	1.18051e+06	1.05591e+06	896371	3.18431e+06	1.04426e+06	3.04934	1.6085	up	2.82161e-19	4.69698e-18	high
Jr10_23790_p1	108984851	P42770	VIT_07s0141g00390	Glutathione reductase, chloroplastic (GR; GRase)	60930	1.13329e+06	1.69899e+06	1.17582e+06	359239	530307	427611	1.33604e+06	439052	3.043	1.60549	up	5.51706e-12	4.50105e-11	high
Jr13_18100_p1_family	109013684	O80763	VIT_01s0127g00600	Probable nucleoredoxin 1 (AtNrx1)	58211	2.12771e+06	2.27084e+06	2.4442e+06	763736	792266	692722	2.28092e+06	749575	3.04295	1.60547	up	7.86773e-30	2.72969e-28	high
Jr10_13570_p1 (+2)	108995846	Q06588	VIT_12s0059g01380	1-aminocyclopropane-1-carboxylate oxidase 4 (ACC oxidase)	36059	224175	514553	203953	160722	88266.2	61389.5	314227	103459	3.03721	1.60274	up	0.000889337	0.0022274	high
Jr04_18480_p1	109008388	Q9LIR6	VIT_00s0252g00050	Beta-amylase 1, chloroplastic	15544	104770	114857	116916	46395.4	34053.6	30508	112181	36985.6	3.03311	1.60079	up	5.4653e-11	3.93311e-10	high
Jr11_09380_p1	108995226	P43082	VIT_14s0081g00050	CD-HEL	20455	4.39679e+07	5.68477e+07	5.08969e+07	1.58115e+07	1.86547e+07	1.55532e+07	5.05708e+07	1.66731e+07	3.03308	1.60078	up	3.04523e-25	7.78068e-24	high
Jr13_06020_p1	109002345	Q9SMM9	VIT_03s0063g00830	Probable carboxylesterase 13	33659	7.44377e+06	7.99462e+06	6.35461e+06	2.14076e+06	2.53336e+06	2.54763e+06	7.26433e+06	2.40725e+06	3.01769	1.59344	up	2.67235e-27	7.79476e-26	high
Jr09_12730_p1	109013131	O82399	VIT_02s0154g00350	Malate dehydrogenase 1, peroxisomal	40869	1.06061e+07	1.23368e+07	1.21722e+07	3.67696e+06	4.08445e+06	3.91572e+06	1.1705e+07	3.89237e+06	3.00717	1.58841	up	6.76547e-36	3.17254e-34	high
Jr04_07600_p1	109021914	Q9SFF9	VIT_10s0003g05250	Germin-like protein subfamily 1 member 7	22962	192964	232893	183519	61855.6	79366.1	61451.6	203125	67557.7	3.00669	1.58818	up	7.9483e-13	7.02348e-12	high
Jr02_06460_p1	109021228	Q9S7P9	VIT_17s0000g06860	SNAP25 homologous protein SNAP33 (AtSNAP33)	33852	1.58735e+06	1.71567e+06	1.45841e+06	409143	591128	585879	1.58714e+06	528717	3.00188	1.58587	up	1.62511e-16	2.10053e-15	high
Jr_Scaffold_4_00010_p1	109019134	P19171	VIT_03s0038g03400	Basic endochitinase B	34326	1.30737e+06	2.17133e+06	1.59718e+06	648393	551542	496807	1.69196e+06	565580	2.99155	1.58089	up	2.47593e-12	2.08713e-11	high
Jr11_05530_p1	108985360	Q9T074	VIT_00s1995g00010	Phosphoenolpyruvate carboxykinase (ATP) (PEP carboxykinase; PEPCK)	73697	328035	358321	404225	151320	121826	92592.2	363527	121913	2.98187	1.57621	up	3.20508e-11	2.41186e-10	high
Jr07_24950_p1	108984610	O23714	VIT_07s0151g00690	Proteasome subunit beta type-2-A	22500	1.74456e+06	2.61877e+06	1.89593e+06	951522	605968	555610	2.08642e+06	704367	2.96212	1.56663	up	3.03792e-09	1.79834e-08	high
Jr07_26770_p1_family	109021733	Q9SYF0	VIT_09s0002g00510	GDSL esterase/lipase 2	41257	998728	1.13274e+06	1.02631e+06	477303	303748	292752	1.05259e+06	357934	2.94074	1.55618	up	7.93503e-12	6.39459e-11	high
Jr11_07580_p1	108992020	O65378	VIT_04s0023g02920	1-aminocyclopropane-1-carboxylate oxidase 3 (ACC oxidase 3; AtACO3)	26669	942661	871298	1.04896e+06	225571	300140	448730	954307	324814	2.93802	1.55484	up	5.1739e-09	2.95549e-08	high
Jr01_03110_p1_family	109006316	P42738	VIT_14s0108g01330	Chorismate mutase 1, chloroplastic (AtCM1)	41744	5.09159e+06	5.356e+06	5.09693e+06	1.53358e+06	1.90669e+06	1.85534e+06	5.18151e+06	1.7652e+06	2.93536	1.55354	up	2.12687e-29	7.15323e-28	high
Jr10_13880_p1	109011629	O65390	VIT_10s0116g01210	Aspartic proteinase A1	57680	9.27117e+06	1.08183e+07	9.92214e+06	3.2979e+06	3.50193e+06	3.43561e+06	1.00039e+07	3.41181e+06	2.93213	1.55195	up	9.51273e-37	4.89906e-35	high
Jr15_01800_p1	109012161	Q9FFW7	VIT_18s0001g15640	Jacalin-related lectin 43	28718	1.21465e+08	1.09956e+08	8.93058e+07	3.40367e+07	3.76414e+07	3.81524e+07	1.06909e+08	3.66102e+07	2.9202	1.54606	up	8.99157e-23	1.9386e-21	high
Jr05_09470_p1	109022081	Q39023	VIT_06s0004g03540	Mitogen-activated protein kinase 3 (AtMPK3; MAP kinase 3)	43162	192826	244596	211176	98152.9	69551	54670.7	216199	74124.8	2.91669	1.54433	up	1.25803e-08	6.94553e-08	high
Jr02_15220_p1	108993798	Q9SGU9	VIT_02s0025g02560	Methionine gamma-lyase (AtMGL)	48933	4.84155e+06	5.0098e+06	3.66891e+06	1.73493e+06	1.63683e+06	1.27002e+06	4.50676e+06	1.54726e+06	2.91274	1.54238	up	2.63139e-16	3.36166e-15	high
Jr06_09120_p1	109007127	Q9T030	VIT_03s0038g04670	Isoflavone reductase homolog PCBER1	34058	2.58516e+07	2.54266e+07	3.61611e+07	9.62847e+06	9.68331e+06	1.07482e+07	2.91464e+07	1.002e+07	2.90883	1.54044	up	9.27967e-19	1.47758e-17	high
Jr06_03960_p1	#N/A	P41376	VIT_04s0008g01000	Eukaryotic initiation factor 4A-1 (eIF-4A-1)	55279	2.23304e+06	2.46485e+06	3.49843e+06	857736	1.09259e+06	872449	2.73211e+06	940925	2.90364	1.53786	up	6.58749e-13	5.8682e-12	high
Jr01_07360_p1 (+1)	108988223	Q9C942	VIT_14s0006g02900	Caffeoylshikimate esterase	42884	37134.2	49214.2	45184	11607.4	17670.1	16102.3	43844.2	15126.6	2.89849	1.53529	up	6.89524e-09	3.89156e-08	high
Jr08_17820_p1	108982359	P29448	VIT_04s0023g02700	Thioredoxin H1 (AtTrxh1)	13088	1.24629e+06	1.1559e+06	1.33267e+06	385527	423502	480082	1.24495e+06	429704	2.89723	1.53468	up	4.88974e-22	1.00729e-20	high
Jr07_04850_p1	108991229	Q94AC1	VIT_18s0001g07090	Rhodanese-like domain-containing protein 6	24184	9.68133e+06	1.08447e+07	1.00584e+07	3.84982e+06	3.23517e+06	3.49677e+06	1.01948e+07	3.52726e+06	2.89029	1.53121	up	1.419e-32	5.63495e-31	high
Jr07_01300_p1	109013889	Q8VYF9	VIT_07s0129g00930	Peptidyl serine alpha-galactosyltransferase (AtSGT1)	20169	7.412e+06	8.31713e+06	9.36927e+06	2.38904e+06	3.05548e+06	3.31202e+06	8.36613e+06	2.91885e+06	2.86625	1.51916	up	4.17971e-19	6.92278e-18	high
Jr11_09150_p1	108995816	Q94IB8	VIT_14s0030g02170	Long chain base biosynthesis protein 1 (AtLCB1)	35809	3.17941e+07	3.84818e+07	3.46963e+07	1.20726e+07	1.22258e+07	1.23511e+07	3.49907e+07	1.22165e+07	2.86422	1.51814	up	1.48353e-32	5.8211e-31	high
Jr01_04200_p1	108999671	Q9M3C6	VIT_14s0066g01380	Photosystem I assembly factor PSA3, chloroplastic	32740	354227	539716	420979	234557	116175	110553	438307	153762	2.85056	1.51125	up	1.08677e-05	3.94057e-05	high
Jr12_08050_p1	108992581	Q93YP4	VIT_05s0124g00040	Clathrin interactor EPSIN 3	96007	97929.8	81224.2	70029.7	29365.5	28726.7	29737.7	83061.2	29276.6	2.83712	1.50442	up	4.24635e-11	3.13109e-10	high
Jr02_18340_p1	108984421	P50700	VIT_02s0025g04340	Osmotin-like protein OSM34	28310	2.65779e+07	3.70333e+07	3.76161e+07	1.17493e+07	1.23312e+07	1.16202e+07	3.37424e+07	1.19002e+07	2.83544	1.50357	up	1.70684e-19	2.9149e-18	high
Jr07_03870_p1	108995385	F4IHJ0	VIT_04s0023g01720	Phosphatidylinositol/phosphatidylcholine transfer protein SFH8	33220	281158	330779	312381	117548	115116	93732.8	308106	108799	2.83188	1.50176	up	1.85727e-14	1.96834e-13	high
Jr10_01810_p1	108985955	Q9ZQ70	VIT_14s0108g01280	Probable WRKY transcription factor 3	56392	104809	112861	90008.8	21798.7	44733.8	42797.9	102560	36443.5	2.81422	1.49273	up	3.2936e-06	1.30164e-05	high
Jr14_06790_p1 (+3)	109003663	O22822	VIT_07s0289g00080	UDP-glycosyltransferase 74F2	51325	33196	48005.4	60863.5	11448.7	22349.2	16846.3	47355	16881.4	2.80515	1.48807	up	2.02754e-05	7.00855e-05	high
Jr06_02750_p1	109010900	Q9LPL6	VIT_18s0001g01180	TOM1-like protein 3	55795	6.78023e+06	7.98649e+06	6.13915e+06	2.33649e+06	2.55436e+06	2.60204e+06	6.96862e+06	2.49763e+06	2.79009	1.48031	up	7.85699e-25	1.94712e-23	high
Jr07_14830_p1 (+1)	109008420	O23406	VIT_05s0062g00640	UDP-glycosyltransferase 75D1	56446	1.32082e+06	1.24762e+06	1.68142e+06	414849	551757	571901	1.41662e+06	512836	2.76232	1.46588	up	2.12795e-13	2.00967e-12	high
Jr05_10930_p1	109006947	O78310	VIT_06s0061g00750	Superoxide dismutase [Cu-Zn] 2, chloroplastic	21823	5.5577e+06	6.14263e+06	5.83434e+06	1.44651e+06	2.35147e+06	2.56335e+06	5.84489e+06	2.12045e+06	2.75645	1.46281	up	4.29271e-11	3.15821e-10	high
Jr01_17180_p1	109011145	Q9SJZ2	VIT_07s0191g00050	Peroxidase 17 (Atperox P17)	37311	224165	288512	173118	72091.5	84933.2	92032.6	228598	83019.1	2.75356	1.4613	up	7.43931e-09	4.1843e-08	high
Jr07_29710_p1 (+2)	109000578	Q8H151	VIT_09s0002g04170	Malonate--CoA ligase	61735	121130	117970	117103	42072.2	50992.7	36400.9	118735	43155.3	2.75133	1.46013	up	5.92707e-11	4.22849e-10	high
Jr10_00430_p1	109001863	P42730	VIT_14s0068g01370	Chaperone protein ClpB1	20986	1.1981e+06	1.23469e+06	1.21356e+06	356345	499896	472460	1.21545e+06	442900	2.7443	1.45644	up	1.28909e-16	1.70636e-15	high
Jr07_11240_p1	108983739	O23349	VIT_05s0077g01290	Primary amine oxidase 1 (AtAO1)	16161	20241.5	18569	15716	6696.11	6802.63	6382.14	18175.5	6626.96	2.74266	1.45556	up	2.91293e-10	1.92792e-09	high
Jr03_05120_p1	109005244	Q9M2M0	VIT_08s0007g06060	Probable glucan endo-1,3-beta-glucosidase BG1	37938	3.49021e+06	2.80266e+06	3.72511e+06	1.49445e+06	1.17134e+06	986890	3.33932e+06	1.21756e+06	2.74263	1.45556	up	4.98829e-13	4.51687e-12	high
Jr10_01560_p1	108985933	Q8GYB8	VIT_18s0041g02080	12-oxophytodienoate reductase 2	40018	2.88321e+07	3.61972e+07	3.30848e+07	1.56972e+07	1.08013e+07	9.32352e+06	3.27047e+07	1.19407e+07	2.73893	1.45361	up	2.28573e-11	1.75204e-10	high
Jr07_28140_p1	108991676	Q43866	VIT_09s0002g02320	Beta-fructofuranosidase, insoluble isoenzyme CWINV1	64794	2.20353e+07	2.1319e+07	2.1795e+07	6.28516e+06	9.99503e+06	7.5098e+06	2.17164e+07	7.93e+06	2.73851	1.45339	up	4.77212e-15	5.51891e-14	high
Jr12_10420_p1	108994833	Q8VZJ2	VIT_05s0077g01150	Probable glucan endo-1,3-beta-glucosidase At4g16260	40941	5.02139e+06	5.80561e+06	7.72489e+06	1.85656e+06	2.76079e+06	2.1689e+06	6.18396e+06	2.26209e+06	2.73374	1.45088	up	3.52611e-11	2.64137e-10	high
Jr15_03970_p1_family	109002733	Q9STX2	VIT_18s0001g09420	3-oxo-Delta(4,5)-steroid 5-beta-reductase	44150	3.02178e+06	3.32107e+06	4.82068e+06	1.13442e+06	1.68372e+06	1.29429e+06	3.72118e+06	1.37081e+06	2.71458	1.44073	up	9.17244e-10	5.75855e-09	high
Jr07_36330_p1 (+3)	108986350	Q9ZV36	VIT_13s0019g00840	UDP-glucuronic acid decarboxylase 6	38808	7.96037e+06	1.06135e+07	7.07757e+06	2.98712e+06	3.44343e+06	3.02682e+06	8.55048e+06	3.15245e+06	2.71232	1.43953	up	1.07558e-15	1.32776e-14	high
Jr01_24930_p1_family	109002826	F4JLS1	VIT_11s0016g00780	Lysine-specific histone demethylase 1 homolog 3	20906	6.72818e+06	8.04713e+06	7.37417e+06	2.37859e+06	2.56465e+06	3.24059e+06	7.38316e+06	2.72794e+06	2.70649	1.43643	up	4.82487e-19	7.95139e-18	high
Jr06_06340_p1	109014296	P43297	VIT_18s0001g09990	Cysteine proteinase RD21A	51734	3.78862e+07	4.20223e+07	3.69236e+07	1.33173e+07	1.55231e+07	1.43593e+07	3.8944e+07	1.43999e+07	2.70447	1.43535	up	2.25435e-28	7.14457e-27	high
Jr14_08810_p1 (+1)	109002332	P49078	VIT_06s0004g06830	Asparagine synthetase [glutamine-hydrolyzing] 1	73091	687531	1.2064e+06	637158	513897	232455	192804	843695	313052	2.69506	1.43032	up	0.000820187	0.00207311	high
Jr15_00080_p1	109002928	Q8GYJ4	VIT_10s0071g00990	Mitochondrial intermembrane space import and assembly protein 40 homolog (AtMIA40)	18438	345548	505762	342972	151822	147389	145143	398094	148118	2.68767	1.42636	up	5.74726e-11	4.11804e-10	high
Jr06_07420_p1	109010310	Q3E9B8	VIT_18s0001g11130	ABC transporter G family member 23 (ABC transporter ABCG.23; AtABCG23)	45542	19757.3	28847.5	20089	5505.37	10113.6	10053	22897.9	8557.33	2.67582	1.41997	up	1.60816e-05	5.65687e-05	high
Jr12_25220_p1 (+1)	109005282	Q9ZUC1	VIT_13s0067g00160	NADPH-dependent alkenal/one oxidoreductase, chloroplastic (AtAOR)	37302	122624	180430	144095	45885	64274.7	57333.2	149050	55831	2.66966	1.41666	up	1.45104e-08	7.93137e-08	high
Jr12_16760_p1	109004937	Q9FLN0	VIT_09s0002g00510	GDSL esterase/lipase 1	42871	1.86833e+06	2.01415e+06	2.12191e+06	575324	817204	863150	2.00146e+06	751892	2.6619	1.41246	up	1.22492e-13	1.17706e-12	high
Jr11_11170_p1	108987227	Q38929	VIT_04s0023g00600	Isopentenyl-diphosphate Delta-isomerase I, chloroplastic	35370	1.03953e+07	1.12931e+07	1.09545e+07	4.28509e+06	4.14523e+06	3.85638e+06	1.0881e+07	4.09557e+06	2.65677	1.40967	up	1.00331e-32	4.03282e-31	high
Jr09_09800_p1	108993800	Q9SN58	VIT_02s0025g01580	UDP-glucose 4-epimerase 5 (AtUGE5)	38004	9.01189e+06	1.09271e+07	9.30565e+06	3.2302e+06	4.07921e+06	3.70492e+06	9.74822e+06	3.67144e+06	2.65515	1.40879	up	1.92726e-21	3.75872e-20	high
Jr10_15470_p1	109007998	Q9FN30	VIT_12s0028g03200	Probable aminotransferase TAT2	46192	67203.5	70045.4	77019.7	23907.9	35086.5	21831.3	71422.9	26941.9	2.651	1.40653	up	8.43515e-08	4.2317e-07	high
Jr07_12990_p1	109005666	Q9SX65	VIT_05s0020g00970	1,4-dihydroxy-2-naphthoyl-CoA thioesterase 1 (AtDHNAT1; DHNA-CoA thioesterase 1)	17090	2.13042e+07	1.99445e+07	1.99905e+07	6.79898e+06	6.86807e+06	9.46508e+06	2.04131e+07	7.71071e+06	2.64737	1.40456	up	2.01349e-17	2.92355e-16	high
Jr11_21580_p1 (+1)	109004813	Q9SKB7	VIT_18s0001g07860	Type II inositol polyphosphate 5-phosphatase 14 (At5PTase14)	22807	73374.6	60752.4	94716.4	26163.5	27311.9	33074.6	76281.1	28850	2.64406	1.40275	up	5.49281e-08	2.83766e-07	high
Jr01_27450_p1	109010148	O49195	VIT_11s0016g02910	Vegetative storage protein 1	29602	4.38871e+06	4.54398e+06	4.34733e+06	1.29763e+06	1.93688e+06	1.79297e+06	4.42667e+06	1.67583e+06	2.64149	1.40135	up	1.46698e-15	1.7908e-14	high
Jr07_34220_p1	109003284	P32826	VIT_13s0019g05130	Serine carboxypeptidase-like 49	57541	3.17097e+06	4.39799e+06	3.67449e+06	1.63507e+06	1.4157e+06	1.23637e+06	3.74782e+06	1.42904e+06	2.6226	1.391	up	1.02002e-14	1.12441e-13	high
Jr13_11450_p1	108997360	Q8LG98	VIT_01s0150g00100	Ubiquitin thioesterase otubain-like	34005	465780	397165	668735	136754	251100	198088	510560	195314	2.61405	1.38629	up	3.39269e-06	1.3376e-05	high
Jr08_09140_p1	109018893	Q84LM4	VIT_18s0001g00510	Acylamino-acid-releasing enzyme (AARE)	82383	1.09983e+06	1.37469e+06	1.14339e+06	578492	467464	338361	1.20597e+06	461439	2.61349	1.38598	up	1.27405e-09	7.80533e-09	high
Jr09_15320_p1	108993754	Q94JQ4	VIT_19s0090g00390	Reactive Intermediate Deaminase A, chloroplastic	24707	1.52332e+07	8.15846e+06	9.13451e+06	3.21823e+06	3.6488e+06	5.64186e+06	1.08421e+07	4.16963e+06	2.60025	1.37865	up	6.39802e-06	2.40729e-05	high
Jr11_14860_p1	108986871	Q9LZI2	VIT_07s0005g00490	UDP-glucuronic acid decarboxylase 2	49727	987582	1.10417e+06	1.12683e+06	341398	485817	412112	1.07286e+06	413109	2.59704	1.37687	up	3.00144e-14	3.07228e-13	high
Jr01_27370_p1	109010220	Q94AA4	VIT_11s0016g02850	ATP-dependent 6-phosphofructokinase 3 (ATP-PFK 3; Phosphofructokinase 3)	54267	119525	113303	116191	62845.9	36161.7	35533	116340	44846.9	2.59415	1.37526	up	1.56067e-06	6.55283e-06	high
Jr01_22810_p1 (+1)	108993501	Q9SK02	VIT_12s0142g00190	DNA repair protein RAD51 homolog 2 (AtRAD51B)	30887	1.47607e+06	1.84306e+06	1.43123e+06	662683	600009	568629	1.58345e+06	610440	2.59396	1.37515	up	8.22378e-17	1.1294e-15	high
Jr14_19120_p1_family	108994625	Q8VZJ2	VIT_08s0007g06060	Probable glucan endo-1,3-beta-glucosidase At4g16260	37256	5.29018e+06	6.13577e+06	6.14391e+06	2.26007e+06	2.3313e+06	2.21407e+06	5.85662e+06	2.26848e+06	2.58174	1.36834	up	7.94104e-28	2.39492e-26	high
Jr01_01120_p1	109001306	Q9LYV6	VIT_14s0068g01360	GEM-like protein 5	32836	2.29517e+07	2.83954e+07	2.42531e+07	9.01492e+06	9.47976e+06	1.0807e+07	2.52001e+07	9.76724e+06	2.58006	1.36741	up	2.82217e-21	5.40806e-20	high
Jr09_15040_p1	108993539	Q9SK27	VIT_19s0177g00200	Early nodulin-like protein 1	22876	171881	378637	133202	94093.2	87276.9	83644.2	227907	88338.1	2.57993	1.36733	up	0.000521239	0.00138214	high
Jr08_18220_p1	108980334	Q8VZG2	VIT_03s0038g04510	Protein HYPER-SENSITIVITY-RELATED 4 (AtHSR4)	55658	13506.1	16997	14774.7	3553.22	7611.85	6400.07	15092.6	5855.05	2.5777	1.36607	up	3.75251e-05	0.000123683	high
Jr06_00110_p1 (+1)	109020252	Q84LM4	VIT_10s0071g00940	Acylamino-acid-releasing enzyme (AARE)	85346	6.01903e+06	7.67232e+06	7.52617e+06	3.44739e+06	2.70958e+06	2.12732e+06	7.0725e+06	2.76143e+06	2.56118	1.35681	up	3.90443e-11	2.89191e-10	high
Jr07_08900_p1 (+1)	108989284	Q9ZPY1	VIT_15s0046g00180	Pyridoxine/pyridoxamine 5'-phosphate oxidase 2 (AtPPOX1)	22669	632401	759804	779396	261613	305496	288145	723867	285085	2.53913	1.34433	up	1.51718e-15	1.84525e-14	high
Jr11_25290_p1	108998862	Q9SUM3	VIT_11s0052g00880	NADPH--cytochrome P450 reductase 2 (CPR 2; P450R 2)	78214	107349	123494	102732	66707.9	37848.8	27180.1	111192	43912.3	2.53213	1.34035	up	0.00013841	0.00041062	high
Jr01_16510_p1	109013246	Q5PP32	VIT_00s0357g00020	WAT1-related protein At3g45870	28487	2.94759e+06	3.31479e+06	3.02041e+06	1.18505e+06	1.19694e+06	1.29172e+06	3.09426e+06	1.22457e+06	2.52682	1.33732	up	9.75425e-25	2.39926e-23	high
Jr06_07200_p1	108987610	Q9SX78	VIT_18s0001g10810	Probable carboxylesterase 2	38177	4.88652e+06	4.67749e+06	5.53037e+06	1.75298e+06	2.09259e+06	2.16558e+06	5.03146e+06	2.00372e+06	2.51106	1.3283	up	5.3399e-20	9.36187e-19	high
Jr07_18100_p1	108984931	Q93VR4	VIT_05s0077g01680	MLP-like protein 423	18220	3.97642e+06	5.23806e+06	4.16849e+06	1.93224e+06	1.73565e+06	1.6656e+06	4.46099e+06	1.77783e+06	2.50923	1.32725	up	2.38497e-17	3.41777e-16	high
Jr01_24720_p1 (+1)	#N/A	O64948	VIT_02s0012g00310	Lon protease homolog 2, peroxisomal	98318	122320	91771.9	161351	77515.4	36122.6	36140.3	125147	49926.1	2.50666	1.32576	up	0.000588228	0.0015406	high
Jr03_24750_p1	109012032	Q8VYN9	VIT_08s0007g01430	Universal stress protein PHOS32	18113	1.6391e+07	1.85664e+07	1.73656e+07	6.63206e+06	7.05105e+06	7.27307e+06	1.7441e+07	6.98539e+06	2.49678	1.32007	up	7.99275e-28	2.39492e-26	high
Jr01_12550_p1	108998580	F4JVN6	VIT_16s0050g00490	Tripeptidyl-peptidase 2	151468	315668	489260	338108	149522	160084	148267	381012	152624	2.4964	1.31985	up	4.02484e-09	2.33966e-08	high
Jr13_29540_p1	109013211	Q9FG01	VIT_16s0098g00320	Splicing factor SF3a60 homolog	65110	186953	299404	182718	138765	68675.1	61164.6	223025	89534.8	2.49093	1.31668	up	0.000539703	0.00142537	high
Jr01_14820_p1	108991557	Q39202	VIT_04s0044g00820	G-type lectin S-receptor-like serine/threonine-protein kinase RLK1	49449	360002	387342	484663	174466	184024	136495	410669	164995	2.48898	1.31555	up	7.32919e-10	4.67254e-09	high
Jr14_05100_p1 (+2)	109002170	Q8GXR9	VIT_13s0073g00310	Alternative NAD(P)H-ubiquinone oxidoreductase C1, chloroplastic/mitochondrial	41355	8.87194e+06	1.10253e+07	8.59789e+06	3.74174e+06	4.02269e+06	3.73465e+06	9.49836e+06	3.83303e+06	2.47803	1.30919	up	3.85651e-20	6.79735e-19	high
Jr09_16430_p1	108994605	Q9LVQ4	VIT_19s0015g00740	WEB family protein At5g55860	71143	75132	87950	70167.8	21552.4	38607.9	34244.5	77749.9	31468.3	2.47074	1.30494	up	4.47958e-06	1.72687e-05	high
Jr10_09420_p1	109018852	Q9FY89	VIT_12s0055g00780	Vacuolar protein sorting-associated protein 20 homolog 2 (AtVPS20-2)	28181	102518	126364	126904	37994.9	55942.3	50092.3	118595	48009.9	2.47022	1.30464	up	6.78082e-08	3.45969e-07	high
Jr04_00830_p1	108989981	Q39072	VIT_08s0058g01020	Cyclin-B1-5	27725	552897	343954	390991	178213	153704	191810	429280	174575	2.459	1.29807	up	3.05332e-08	1.61278e-07	high
Jr02_00880_p1	108995096	Q5MAU8	VIT_17s0000g01400	Probable inactive purple acid phosphatase 27	69222	100517	84716.5	103331	44674.3	37136.8	35583.2	96188.1	39131.4	2.45808	1.29753	up	5.25343e-09	2.99573e-08	high
Jr07_34700_p1	108997113	Q9ZUA0	VIT_13s0019g04410	Dolichyl-diphosphooligosaccharide--protein glycosyltransferase subunit 1B	52578	1.16851e+06	1.62453e+06	1.65605e+06	485879	727710	601424	1.48303e+06	605004	2.45127	1.29353	up	3.33383e-09	1.9587e-08	high
Jr15_02970_p1	#N/A	Q9XI05	VIT_18s0001g02260	Proteasome subunit beta type-3-A	22876	4.7479e+06	5.17128e+06	4.89705e+06	1.84188e+06	2.23964e+06	1.96794e+06	4.93874e+06	2.01649e+06	2.44918	1.2923	up	2.4078e-22	5.05485e-21	high
Jr04_18760_p1	108987796	O81644	VIT_08s0007g08690	Villin-2	105647	170732	188096	238558	71848.8	107112	65364	199129	81441.5	2.44506	1.28987	up	1.75509e-06	7.2673e-06	high
Jr13_09210_p1	108999651	Q9M2H6	VIT_10s0003g03840	MATH domain and coiled-coil domain-containing protein At3g58400	47982	5.83699e+06	6.30568e+06	5.00724e+06	2.49728e+06	2.25272e+06	2.27864e+06	5.71664e+06	2.34288e+06	2.44	1.28688	up	1.53393e-20	2.74774e-19	high
Jr12_16570_p1	109004987	Q9LDV4	VIT_09s0002g00340	Alanine aminotransferase 2, mitochondrial (AtAlaAT2; AtAlaATm)	52967	7.03276e+06	8.09716e+06	8.72953e+06	2.88773e+06	3.56961e+06	3.34679e+06	7.95315e+06	3.26804e+06	2.43361	1.2831	up	1.95424e-18	3.02402e-17	high
Jr02_15740_p1	109002083	Q9SGW3	VIT_02s0025g02010	26S proteasome non-ATPase regulatory subunit 8 homolog A	30898	725404	605557	672384	296108	249945	277513	667781	274522	2.43252	1.28245	up	1.03797e-14	1.14038e-13	high
Jr13_25010_p1 (+1)	108984846	Q9SRQ1	VIT_16s0039g00910	Cytochrome P450 89A9	57693	592160	698055	966290	189847	372898	365911	752168	309552	2.42986	1.28087	up	4.48254e-05	0.000145993	high
Jr08_01580_p1	108985129	O22969	VIT_11s0016g05100	Uncharacterized protein At2g34160	14471	385977	359141	482042	95585.2	214504	195901	409053	168663	2.42526	1.27814	up	7.963e-05	0.00024598	high
Jr10_12520_p1	#N/A	P29976	VIT_00s0391g00070	Phospho-2-dehydro-3-deoxyheptonate aldolase 1, chloroplastic	58538	144495	180433	163819	71874.1	70621.7	59562.9	162916	67352.9	2.41884	1.27431	up	1.26396e-09	7.75794e-09	high
Jr11_15990_p1	109007316	Q9LT47	VIT_07s0005g01470	Polycomb group protein FERTILIZATION-INDEPENDENT ENDOSPERM	35683	1.60067e+06	1.74306e+06	1.97457e+06	634214	797252	779141	1.77276e+06	736869	2.40581	1.26652	up	1.37225e-14	1.4878e-13	high
Jr07_20020_p1	108994999	Q9C5J7	VIT_05s0020g02540	ATP-dependent 6-phosphofructokinase 7 (ATP-PFK 7; Phosphofructokinase 7)	29674	4.51984e+06	5.26997e+06	4.52044e+06	2.13524e+06	1.92973e+06	1.88988e+06	4.77008e+06	1.98495e+06	2.40312	1.26491	up	3.38242e-21	6.44419e-20	high
Jr08_03100_p1 (+1)	108979617	Q67XG0	VIT_04s0008g04210	Two-on-two hemoglobin-3 (AtGLB3)	19694	156670	189303	189280	51312	83387.5	88328.5	178417	74342.7	2.39993	1.26299	up	2.22305e-06	9.03475e-06	high
Jr01_21720_p1_family	108983480	P31168	No Vitis hit	Dehydrin COR47	29020	1.60208e+06	2.45994e+06	1.40738e+06	854846	744004	684571	1.82313e+06	761140	2.39527	1.26019	up	1.03928e-07	5.13562e-07	high
Jr07_34610_p1	108997151	Q9ZV06	VIT_13s0019g04540	Probable acetyltransferase NATA1-like	26102	447753	432364	485164	153082	188707	228671	455094	190153	2.3933	1.259	up	8.78231e-10	5.55357e-09	high
Jr10_19620_p1	108989752	Q8GZB4	VIT_11s0016g02570	Phospholipase A2-beta	15717	402778	500763	466047	166002	190895	216165	456530	191020	2.38995	1.25698	up	4.8126e-11	3.50162e-10	high
Jr12_08490_p1	108993851	O22707	VIT_05s0062g00980	Probable aldo-keto reductase 3	34272	2.53787e+06	2.84378e+06	2.82514e+06	1.10435e+06	1.18756e+06	1.14406e+06	2.73559e+06	1.14532e+06	2.38849	1.2561	up	5.4988e-22	1.11877e-20	high
Jr13_23740_p1	108989577	Q2V3E2	VIT_16s0098g01380	Protein yippee-like At4g27740	11821	619663	507294	460152	252214	166799	246197	529036	221737	2.38588	1.25452	up	4.711e-08	2.43759e-07	high
Jr12_12330_p1 (+1)	109005892	Q9FZI8	VIT_05s0020g02640	Lecithin-cholesterol acyltransferase-like 1	42251	216194	240950	223846	86483.6	103724	95835.6	226997	95347.8	2.38072	1.2514	up	4.66714e-11	3.41842e-10	high
Jr11_15320_p1	108994128	Q93VR4	VIT_05s0077g01690	MLP-like protein 423	21318	6.55052e+06	7.46388e+06	8.47335e+06	2.90709e+06	3.13766e+06	3.41339e+06	7.49592e+06	3.15271e+06	2.37761	1.24951	up	9.39517e-18	1.37629e-16	high
Jr13_18070_p1	109013684	O80763	VIT_01s0127g00560	Probable nucleoredoxin 1 (AtNrx1)	60315	1.27581e+06	1.17083e+06	1.63646e+06	500788	660947	557999	1.36103e+06	573245	2.37426	1.24748	up	1.14598e-10	7.90198e-10	high
Jr12_08770_p1	109011701	Q94BZ5	VIT_05s0029g00350	Heat stress transcription factor A-5 (AtHsfA5)	51950	15298.1	16654.4	14207	7034.71	6325.33	6114.61	15386.5	6491.55	2.37023	1.24501	up	3.52529e-08	1.84434e-07	high
Jr01_12800_p1	108998554	Q9LSY6	VIT_06s0004g06390	UDP-glycosyltransferase 71B6	53135	892954	957377	979382	387779	445125	368721	943238	400542	2.35491	1.23567	up	1.04064e-15	1.28945e-14	high
Jr15_05110_p1	108979542	F4I9Q5	VIT_18s0001g10520	DExH-box ATP-dependent RNA helicase DExH7, chloroplastic	13849	7.55723e+06	6.19415e+06	6.81451e+06	2.7036e+06	2.48761e+06	3.55317e+06	6.8553e+06	2.91479e+06	2.3519	1.23382	up	9.87528e-13	8.65663e-12	high
Jr06_19450_p1 (+2)	109012898	F4KDH9	VIT_11s0037g00130	FIP1[V]-like protein (AtFIP1(V))	156433	12569.8	36748.5	17297	4472.77	12970.3	10889.1	22205.1	9444.04	2.35123	1.2334	up	0.0187606	0.0349351	med
Jr04_18210_p1	108999336	O80543	VIT_08s0007g05580	Putative methyltransferase At1g22800, mitochondrial	30168	2.90629e+06	3.47799e+06	5.26992e+06	1.60383e+06	1.69662e+06	1.6579e+06	3.88473e+06	1.65278e+06	2.35043	1.23292	up	5.75919e-08	2.96598e-07	high
Jr07_25800_p1	109009794	Q9LIQ4	VIT_05s0051g00410	Hydroxyethylthiazole kinase	31798	235390	256025	237742	148766	84589.4	78454	243052	103937	2.33847	1.22556	up	1.92085e-05	6.65734e-05	high
Jr12_07520_p1	108992456	Q9M1B9	VIT_05s0102g00710	Probable fructokinase-4	35485	1.20908e+07	1.32679e+07	1.38128e+07	5.083e+06	5.72652e+06	6.01143e+06	1.30572e+07	5.60698e+06	2.32874	1.21955	up	4.0744e-21	7.71794e-20	high
Jr06_18420_p1	108996811	Q9M098	VIT_11s0037g00330	Nucleoid-associated protein At4g30620, chloroplastic	20974	2.51139e+06	1.12568e+06	1.75918e+06	500303	707274	1.11038e+06	1.79875e+06	772653	2.32802	1.2191	up	0.00110393	0.00270725	high
Jr08_05840_p1 (+1)	108981127	Q9LU64	VIT_16s0013g00260	Superoxide dismutase [Fe] 2, chloroplastic	35114	2.42125e+06	2.47269e+06	2.70249e+06	962770	1.44718e+06	860487	2.53214e+06	1.09014e+06	2.32276	1.21584	up	2.02512e-08	1.09244e-07	high
Jr03_06970_p1	108990639	Q9LV77	VIT_00s0561g00020	Asparagine synthetase [glutamine-hydrolyzing] 2	29122	1.344e+06	1.63596e+06	1.21631e+06	512226	701958	593746	1.39875e+06	602643	2.32103	1.21477	up	1.68788e-10	1.14448e-09	high
Jr11_11300_p1	108997258	O04153	VIT_04s0023g00830	Calreticulin-3	50614	3.96062e+07	4.2808e+07	3.71914e+07	1.73431e+07	1.72069e+07	1.71712e+07	3.98685e+07	1.72404e+07	2.31251	1.20946	up	1.18052e-23	2.72097e-22	high
Jr11_21770_p1	109021178	Q5IBC5	VIT_18s0001g07770	Separase	17100	124805	114126	110678	43687.9	54958.3	53694.5	116536	50780.2	2.29491	1.19844	up	1.7411e-08	9.45412e-08	high
Jr16_01260_p1	109004581	Q9ZW38	VIT_16s0098g00270	F-box/kelch-repeat protein At2g29600	13297	443422	539007	435446	211601	199936	206912	472625	206149	2.29263	1.197	up	5.886e-12	4.77839e-11	high
Jr01_11490_p1	108998669	Q6NPM5	VIT_16s0022g02100	Embryo-specific protein ATS3B	20485	466949	636768	551704	284139	245592	192679	551807	240803	2.29153	1.19631	up	3.58955e-08	1.87498e-07	high
Jr01_30110_p1	108995606	Q07488	VIT_11s0016g05520	Blue copper protein	17139	144809	183735	186542	17934.1	101106	106170	171695	75070.1	2.28713	1.19354	up	0.0413418	0.0700939	low
Jr08_13180_p1 (+1)	#N/A	Q1H595	VIT_07s0104g00560	Sm-like protein LSM2 (AtLSM2)	14731	426985	266615	422670	154772	156749	176549	372090	162690	2.28711	1.19352	up	4.03609e-07	1.80997e-06	high
Jr12_21400_p1 (+1)	109010696	O22133	VIT_15s0048g00980	Protein BRI1-5 ENHANCED 1	36758	744350	811236	646735	305661	344510	316233	734107	322135	2.27888	1.18833	up	5.32726e-13	4.79744e-12	high
Jr03_00230_p1	108983585	Q43314	VIT_08s0007g07400	Glutamate dehydrogenase 1 (GDH 1)	44602	89257.2	107303	96193.9	36219.2	50184.6	42129.4	97584.5	42844.4	2.27765	1.18754	up	2.11225e-07	9.9885e-07	high
Jr07_25240_p1	109013642	Q39173	VIT_05s0094g01120	NADP-dependent alkenal double bond reductase P2	39008	935621	1.208e+06	1.10483e+06	615763	513158	299172	1.08282e+06	476031	2.27468	1.18566	up	1.79927e-05	6.27553e-05	high
Jr07_12400_p1 (+4)	#N/A	Q9LQC8	VIT_05s0020g00490	ADP-ribosylation factor 2-A (AtARF2)	20694	7.53679e+06	9.49975e+06	9.54373e+06	3.86733e+06	4.73171e+06	3.10576e+06	8.86009e+06	3.9016e+06	2.27089	1.18326	up	5.12231e-10	3.31042e-09	high
Jr07_24500_p1	108989494	Q93ZN2	VIT_05s0020g04130	Probable aldo-keto reductase 4	38048	7.49923e+07	8.47218e+07	7.80234e+07	3.37289e+07	3.25027e+07	3.84691e+07	7.92458e+07	3.49002e+07	2.27064	1.1831	up	6.90888e-19	1.11081e-17	high
Jr08_01270_p1 (+1)	109002806	Q8VY97	VIT_04s0008g06490	ER membrane protein complex subunit 7 homolog	29605	67386.6	76367	61782.4	13894.4	37137.5	39628.3	68512	30220.1	2.2671	1.18085	up	0.00328836	0.00726437	high
Jr07_24540_p1	108989463	Q8W108	VIT_05s0020g04080	1,2-dihydroxy-3-keto-5-methylthiopentene dioxygenase 3	23695	1.0372e+07	9.20897e+06	1.09837e+07	3.77448e+06	4.78831e+06	4.94435e+06	1.01882e+07	4.50238e+06	2.26285	1.17814	up	1.54648e-14	1.66032e-13	high
Jr08_09510_p1 (+1)	109021598	Q8L7D5	VIT_18s0001g00030	Cytochrome P450 708A2	53969	154148	217462	242227	100430	91962.8	79509.7	204612	90634.1	2.25756	1.17476	up	1.2185e-06	5.16883e-06	high
Jr03_01700_p1 (+1)	108985712	Q700D5	VIT_08s0007g03440	Probable lysophospholipase BODYGUARD 4 (AtBDG4)	42334	137786	155081	207814	63850.2	86908.1	71890.1	166894	74216.1	2.24875	1.16912	up	2.45975e-06	9.88701e-06	high
Jr11_20880_p1	108991394	Q9SB50	VIT_18s0001g13000	AP-4 complex subunit mu	53697	103593	110143	124183	50645.1	52762.2	47098.9	112640	50168.7	2.24522	1.16685	up	1.42597e-08	7.80731e-08	high
Jr02_00250_p1 (+1)	109000295	Q8RWD5	VIT_17s0000g00390	Coiled-coil domain-containing protein SCD2	63289	911423	1.02372e+06	938791	398617	462344	419898	957977	426953	2.24375	1.16591	up	8.15002e-15	9.16808e-14	high
Jr16_11710_p1 (+3)	109009251	Q9CA57	VIT_01s0026g02390	Glutathione S-transferase U10 (AtGSTU10)	25880	3.91831e+06	3.94779e+06	3.95982e+06	1.89521e+06	1.74235e+06	1.63611e+06	3.94197e+06	1.75789e+06	2.24244	1.16507	up	1.36478e-20	2.4581e-19	high
Jr11_03070_p1	109012724	Q9MA55	VIT_14s0060g02410	Acyl-CoA-binding domain-containing protein 4 (Acyl-CoA binding protein 4)	73775	3.56415e+06	4.68467e+06	3.95761e+06	2.04908e+06	1.85357e+06	1.56226e+06	4.06881e+06	1.82164e+06	2.2336	1.15937	up	5.09442e-12	4.18733e-11	high
Jr09_01950_p1	109001218	Q7XJ60	VIT_01s0026g02120	Microtubule-associated protein RP/EB family member 1A	31322	17493.6	22458.4	13898.8	5098.88	10080.1	8957.88	17950.2	8045.62	2.23106	1.15771	up	0.000653381	0.00168773	high
Jr02_10020_p1 (+1)	#N/A	Q9SEH3	VIT_16s0013g00520	Ras-related protein RABD2c (AtRABD2c)	22609	822064	934715	1.11951e+06	359042	492620	438842	958762	430168	2.22881	1.15627	up	3.26167e-09	1.91972e-08	high
Jr03_09070_p1 (+1)	109008286	Q9LRJ9	VIT_12s0059g02620	Cysteine-rich repeat secretory protein 38	27057	5.37834e+06	7.29446e+06	5.57234e+06	2.40657e+06	2.98752e+06	2.80587e+06	6.08171e+06	2.73332e+06	2.22503	1.15382	up	5.75762e-12	4.68571e-11	high
Jr01_26080_p1	109008993	Q9S7U9	VIT_11s0016g01770	Mitogen-activated protein kinase kinase 2 (AtMAP2Kbeta; AtMKK2; MAP kinase kinase 2)	39320	54723.7	65255.8	60857.1	40687	18489.6	22402.8	60278.9	27193.1	2.21669	1.14841	up	0.000628188	0.00162648	high
Jr13_24380_p1	108996985	Q9FK25	VIT_16s0098g00850	Flavone 3'-O-methyltransferase 1 (AtOMT1)	39170	1.50011e+06	1.98902e+06	2.27036e+06	740818	959608	900708	1.91983e+06	867045	2.21422	1.1468	up	1.05855e-08	5.85398e-08	high
Jr15_03960_p1	109002732	Q9STX2	VIT_18s0001g09420	3-oxo-Delta(4,5)-steroid 5-beta-reductase	44531	114698	133477	159497	59148.6	73607.9	51980.6	135891	61579	2.20677	1.14193	up	2.53639e-06	1.01702e-05	high
Jr03_09310_p1	109003589	Q8GUN2	VIT_01s0011g01610	Adenylylsulfatase HINT1	19785	2.32886e+06	1.30981e+06	1.22957e+06	648629	668623	889483	1.62274e+06	735578	2.20608	1.14148	up	5.35778e-05	0.000171283	high
Jr13_02730_p1	109020655	P33154	VIT_03s0088g00810	Pathogenesis-related protein 1 (PR-1)	22095	151084	170696	153376	60825.6	80425.8	74759.2	158385	72003.5	2.19969	1.1373	up	7.21794e-08	3.67135e-07	high
Jr07_11580_p1	108979501	O80912	VIT_05s0077g00910	Peroxidase 23 (Atperox P23)	12371	1.18856e+06	1.44223e+06	1.37032e+06	737358	500836	581062	1.3337e+06	606419	2.19931	1.13705	up	2.47009e-09	1.48566e-08	high
Jr10_05560_p1	109002226	O49354	VIT_14s0006g02080	Ubiquinone biosynthesis O-methyltransferase, mitochondrial	37539	565413	700538	609044	282531	286933	287414	624999	285626	2.18817	1.12972	up	3.06335e-12	2.55615e-11	high
Jr03_10620_p1	109022014	Q9SYB5	VIT_10s0116g00550	Probable dolichyl-diphosphooligosaccharide--protein glycosyltransferase subunit 3B	39112	87341.2	123875	126959	39868.4	66515.4	48243.5	112725	51542.4	2.18703	1.12897	up	6.80246e-05	0.000213329	high
Jr02_15000_p1	109021046	A1L4Y2	VIT_02s0025g02730	Alcohol dehydrogenase-like 3	42812	1.91214e+06	2.31835e+06	2.13394e+06	899489	1.05585e+06	969153	2.12148e+06	974830	2.17625	1.12185	up	3.36365e-14	3.42178e-13	high
Jr03_26200_p1	108994887	Q39101	VIT_08s0058g00410	Ferritin-1, chloroplastic (AtFer1)	30431	2.47555e+06	3.27281e+06	3.13967e+06	1.83527e+06	1.19523e+06	1.07438e+06	2.96268e+06	1.36829e+06	2.16523	1.11452	up	2.23585e-06	9.07557e-06	high
Jr10_19630_p1	108989762	Q9SZ42	VIT_11s0016g02580	Fatty acid desaturase 4, chloroplastic	130587	234858	222729	240979	84659.1	117868	120266	232855	107598	2.16413	1.11379	up	2.24695e-07	1.05498e-06	high
Jr14_18090_p1	109000616	Q8H0X6	VIT_06s0009g02230	Cysteine proteinase inhibitor 6 (AtCYS-6)	11350	6.68074e+06	3.50475e+06	3.68851e+06	1.59995e+06	1.88199e+06	2.93424e+06	4.62467e+06	2.13873e+06	2.16235	1.1126	up	0.00060296	0.00157228	high
Jr11_19760_p1	108982120	A0A1P8B554	VIT_18s0001g14480	Thaumatin-like protein 1 (AtTLP1)	33101	282663	282264	318005	109444	149608	150167	294311	136406	2.1576	1.10943	up	9.10279e-08	4.55278e-07	high
Jr03_15320_p1	108998058	Q9XIE6	VIT_10s0003g02610	Phospholipid-transporting ATPase 3 (AtALA3)	55944	25448.1	37171.6	22489.4	13297.6	14585.1	11606.5	28369.7	13163.1	2.15525	1.10784	up	6.23155e-05	0.000196359	high
Jr02_12350_p1	109022331	Q9ZVJ5	VIT_02s0012g00750	Haloacid dehalogenase-like hydrolase domain-containing protein Sgpp	26907	1.10262e+07	1.14392e+07	1.05565e+07	4.97252e+06	5.07613e+06	5.27574e+06	1.10073e+07	5.10813e+06	2.15486	1.10759	up	2.47034e-22	5.15332e-21	high
Jr12_19570_p1_family	108983866	Q9M9E1	VIT_09s0002g05590	ABC transporter G family member 40 (ABC transporter ABCG.40; AtABCG40)	163288	676912	812838	585902	272962	360295	330716	691884	321325	2.15322	1.1065	up	2.21492e-08	1.18899e-07	high
Jr15_03330_p1	109008863	Q9FJK3	VIT_04s0008g01340	Agamous-like MADS-box protein AGL80	34291	264937	346602	277297	170675	118653	123802	296279	137710	2.15147	1.10532	up	1.51394e-06	6.36472e-06	high
Jr12_00250_p1	#N/A	Q8VY57	VIT_00s0601g00030	ADP-ribosylation factor-like protein 8a (AtARL8a)	20465	80428.2	93248.9	105831	29573.6	53057.2	47548.6	93169.4	43393.2	2.1471	1.10239	up	0.000111075	0.000334954	high
Jr07_32500_p1	108981403	Q9S9N1	VIT_11s0037g00510	Heat shock 70 kDa protein 5	70870	1.0841e+06	1.34791e+06	1.32268e+06	531112	816641	402042	1.25156e+06	583265	2.14579	1.10151	up	4.81481e-05	0.00015589	high
Jr13_02350_p1 (+1)	108983121	Q9C7Z9	VIT_03s0091g01290	Serine carboxypeptidase-like 18	54885	6.96195e+06	7.78998e+06	9.23571e+06	3.27427e+06	4.01245e+06	3.90041e+06	7.99588e+06	3.72904e+06	2.14422	1.10045	up	2.42379e-12	2.04841e-11	high
Jr12_04510_p1	109002714	O81831	VIT_15s0107g00310	Calcium-binding protein KRP1	18592	317061	238610	328523	171923	105457	135261	294731	137547	2.14277	1.09947	up	1.21856e-05	4.36562e-05	high
Jr11_25140_p1 (+1)	108998878	Q9S725	VIT_11s0052g01090	4-coumarate--CoA ligase 2 (4CL 2)	59784	294888	305690	385267	96324.9	207268	156759	328615	153450	2.1415	1.09862	up	0.000291486	0.000808703	high
Jr14_09920_p1	109007403	F4HQM3	VIT_06s0004g05890	Neutral ceramidase 1 (AtNCER1; N-CDase 1; NCDase 1)	85926	2.18039e+06	2.84954e+06	2.47388e+06	1.1636e+06	1.2524e+06	1.09935e+06	2.50127e+06	1.17178e+06	2.13459	1.09396	up	1.24393e-12	1.07894e-11	high
Jr01_34020_p1	#N/A	Q9SHR7	VIT_12s0057g00630	Chlorophyll a-b binding protein 2.1, chloroplastic	28483	1.61534e+07	1.00529e+07	1.11316e+07	5.2789e+06	4.6314e+06	7.59028e+06	1.2446e+07	5.83353e+06	2.13352	1.09324	up	1.36037e-05	4.83167e-05	high
Jr01_08320_p1	108987956	Q9LVH4	VIT_14s0006g01250	Protein C2-DOMAIN ABA-RELATED 4	18892	238159	263187	280687	100848	143662	122062	260678	122191	2.13337	1.09313	up	2.38947e-07	1.11712e-06	high
Jr07_05750_p1 (+3)	108982602	Q9LQ73	VIT_15s0048g01890	Peroxisomal membrane protein 11C	25803	411799	395718	486433	204069	210050	192648	431317	202255	2.13253	1.09257	up	3.70058e-10	2.4297e-09	high
Jr13_23980_p1 (+1)	108992290	F4JJP1	VIT_16s0098g01130	WEB family protein At4g27595, chloroplastic	96008	110972	142331	120718	67398.7	49964.2	58478.2	124673	58613.7	2.12703	1.08884	up	1.69577e-06	7.04825e-06	high
Jr16_15690_p1	109006648	Q9SII8	VIT_03s0038g03680	Ubiquitin domain-containing protein DSK2b	59874	48071	49909.9	60143.4	28677.2	24564.4	21170.5	52708.1	24804	2.12498	1.08745	up	4.66888e-06	1.79564e-05	high
Jr08_11910_p1	108989025	Q9SQR3	VIT_07s0005g00700	Strigolactone esterase D14	35465	2.67478e+07	3.26692e+07	3.67584e+07	1.46786e+07	1.68843e+07	1.37287e+07	3.20585e+07	1.50972e+07	2.12347	1.08642	up	3.00206e-11	2.27991e-10	high
Jr02_05420_p1	#N/A	Q9STT2	VIT_17s0000g05880	Vacuolar protein sorting-associated protein 29	21246	3.04507e+06	3.88963e+06	3.79711e+06	1.91974e+06	1.61957e+06	1.52374e+06	3.57727e+06	1.68768e+06	2.11963	1.08381	up	2.49563e-11	1.90849e-10	high
Jr13_07290_p1	109011192	Q9M069	VIT_03s0063g02490	Glucan endo-1,3-beta-glucosidase 7	52804	8.71237e+06	8.75514e+06	7.8943e+06	3.42364e+06	4.28113e+06	4.27774e+06	8.45394e+06	3.99417e+06	2.11657	1.08173	up	1.23652e-14	1.34508e-13	high
Jr08_14620_p1	108987227	Q42553	VIT_04s0023g00600	Isopentenyl-diphosphate Delta-isomerase II, chloroplastic	38440	1.39454e+06	1.39654e+06	1.36388e+06	516982	757735	691110	1.38499e+06	655276	2.11359	1.0797	up	1.7957e-09	1.08999e-08	high
Jr07_21480_p1	109014350	F4JZY1	VIT_05s0094g00880	COP1-interactive protein 1	13808	4.70173e+06	3.55726e+06	3.54388e+06	1.27656e+06	1.59214e+06	2.72919e+06	3.93429e+06	1.86596e+06	2.10845	1.07618	up	0.000234178	0.000658575	high
Jr07_34380_p1	108992763	Q8VZ40	VIT_13s0019g04710	U-box domain-containing protein 14	68968	130047	174571	143012	69230.8	74562.5	68703.6	149210	70832.3	2.10652	1.07486	up	3.91873e-07	1.77176e-06	high
Jr07_38550_p1	108991945	Q9FLC0	VIT_13s0067g02360	Peroxidase 52 (Atperox P52)	34344	1.28996e+07	1.65181e+07	1.46952e+07	7.30985e+06	6.34186e+06	7.29283e+06	1.47043e+07	6.98151e+06	2.10618	1.07463	up	6.62213e-14	6.53489e-13	high
Jr11_27810_p1	109009560	Q9SJA7	VIT_04s0069g00860	Probable sarcosine oxidase	44933	2.87657e+06	3.23382e+06	3.62233e+06	1.32125e+06	1.68883e+06	1.61301e+06	3.24424e+06	1.54103e+06	2.10524	1.07398	up	2.19936e-11	1.69371e-10	high
Jr01_11690_p1	108998652	Q9FLH8	VIT_16s0022g02340	Probable fructokinase-7	45206	8.12938e+06	9.93658e+06	8.88797e+06	4.49578e+06	4.1812e+06	4.12694e+06	8.98464e+06	4.26797e+06	2.10513	1.07391	up	1.08249e-16	1.46225e-15	high
Jr13_07250_p1	#N/A	Q9LS94	VIT_03s0063g02420	Ras-related protein RABG3f (AtRABG3f)	23095	105514	228736	204599	94215.5	95878.4	65938.5	179616	85344.2	2.10461	1.07355	up	0.00130861	0.00317145	high
Jr09_10420_p1 (+1)	108997293	Q6DST1	VIT_16s0050g01770	Late embryogenesis abundant protein At1g64065	22437	1.78626e+06	1.59509e+06	1.68963e+06	619388	908987	883013	1.69033e+06	803796	2.10293	1.0724	up	8.37216e-09	4.69297e-08	high
Jr03_04800_p1	108989327	O22229	VIT_08s0007g08760	NADPH-dependent thioredoxin reductase 3 (NTR3)	55802	485364	405258	376496	119391	286781	199645	422373	201939	2.09159	1.0646	up	0.000957562	0.00237839	high
Jr09_10780_p1	108997380	O81742	VIT_02s0025g00100	Beta-adaptin-like protein C (At-bC-Ad; At-betaC-Ad)	100295	216953	271400	222579	170096	93656.9	76934.4	236977	113562	2.08676	1.06126	up	0.00108442	0.00266735	high
Jr11_05790_p1_family	109013226	Q94AM1	VIT_06s0061g01070	Organellar oligopeptidase A, chloroplastic/mitochondrial	89744	841690	861288	1.0291e+06	421092	489519	402468	910691	437693	2.08066	1.05704	up	2.24764e-10	1.50268e-09	high
Jr10_01570_p1	108983625	Q8GYB8	VIT_18s0041g02080	12-oxophytodienoate reductase 2	40321	640493	716894	589597	381061	309696	245074	648995	311944	2.08049	1.05692	up	4.39652e-07	1.96354e-06	high
Jr14_04610_p1	109013963	O80910	VIT_13s0106g00640	TOM1-like protein 6	52293	63776.3	96904.4	128485	46072	53594.9	39350.6	96388.6	46339.2	2.08007	1.05663	up	0.000574892	0.00150983	high
Jr11_21260_p1 (+1)	108991349	Q9T074	VIT_00s1995g00010	Phosphoenolpyruvate carboxykinase (ATP) (PEP carboxykinase; PEPCK)	80320	1.10206e+06	1.25009e+06	1.04026e+06	562521	598997	471395	1.1308e+06	544304	2.07752	1.05486	up	1.7533e-10	1.18177e-09	high
Jr12_18650_p1	109007859	F4HQA1	VIT_09s0002g03510	Protein PAF1 homolog	81782	151834	267481	149003	135566	70539.8	67798.8	189439	91301.6	2.07487	1.05302	up	0.00475764	0.0101694	med
Jr11_00830_p1	109009712	Q38853	VIT_00s0684g00030	Rhodanese-like domain-containing protein 15, chloroplastic	19743	2.49336e+06	3.14393e+06	2.341e+06	1.1072e+06	1.26131e+06	1.48634e+06	2.65943e+06	1.28495e+06	2.06968	1.04941	up	6.66909e-09	3.77038e-08	high
Jr15_04000_p1	109002730	Q9S7L9	VIT_13s0067g03800	Cytochrome c oxidase subunit 6b-1 (AtCOX6b-1)	22180	4.79659e+06	5.0219e+06	6.71755e+06	2.45726e+06	2.74201e+06	2.81411e+06	5.51201e+06	2.67113e+06	2.06355	1.04513	up	3.39682e-10	2.23918e-09	high
Jr04_17290_p1	108982970	Q9ZRW8	VIT_19s0093g00310	Glutathione S-transferase U19 (AtGSTU19)	26037	4.23395e+06	4.55604e+06	4.25282e+06	1.55393e+06	2.53461e+06	2.23331e+06	4.3476e+06	2.10729e+06	2.06313	1.04483	up	8.04896e-08	4.05648e-07	high
Jr07_11250_p1	109022057	Q9FGY1	VIT_05s0077g01280	Beta-D-xylosidase 1 (AtBXL1)	85476	2.08916e+06	2.61932e+06	2.0925e+06	998912	1.2254e+06	1.0732e+06	2.26699e+06	1.09917e+06	2.06246	1.04437	up	1.18378e-10	8.14557e-10	high
Jr12_10750_p1	108994843	Q93VR4	VIT_05s0077g01660	MLP-like protein 423	20192	1.7468e+08	2.47368e+08	2.08604e+08	9.931e+07	1.01396e+08	1.0578e+08	2.10217e+08	1.02162e+08	2.05769	1.04103	up	9.30322e-11	6.46908e-10	high
Jr09_04790_p1	108994392	Q9SZX3	VIT_17s0000g01690	Argininosuccinate synthase, chloroplastic	54934	315805	391021	272162	172622	171868	131885	326329	158792	2.05508	1.03919	up	3.01574e-06	1.19902e-05	high
Jr07_14990_p1	108996670	Q9SFU0	VIT_05s0062g00130	Protein transport protein Sec24-like At3g07100	85032	12195	12222.1	14134.7	4198.87	8162.65	6407.39	12850.6	6256.3	2.05402	1.03844	up	0.00059286	0.0015502	high
Jr13_07910_p1 (+2)	108986970	Q9SJT1	VIT_03s0038g04320	SUMO-activating enzyme subunit 2	71796	127746	110108	136274	42455.5	69391.2	70419.8	124709	60755.5	2.05264	1.03748	up	0.000101849	0.000309111	high
Jr11_10200_p1 (+3)	109004212	Q8RXU4	VIT_14s0036g00520	Probable low-specificity L-threonine aldolase 1	38395	7.50793e+06	8.49224e+06	7.30171e+06	3.99861e+06	3.97041e+06	3.38322e+06	7.7673e+06	3.78408e+06	2.05262	1.03747	up	9.73776e-15	1.07704e-13	high
Jr15_04230_p1	108990396	P43297	VIT_18s0001g09990	Cysteine proteinase RD21A	51568	3.82485e+06	3.95483e+06	4.03715e+06	1.70236e+06	2.02559e+06	2.04496e+06	3.93894e+06	1.9243e+06	2.04694	1.03347	up	8.77601e-15	9.80533e-14	high
Jr05_08580_p1	109017540	P13853	VIT_13s0019g03000	17.6 kDa class I heat shock protein 3	17873	351797	805610	166919	153348	384652	109450	441442	215817	2.04545	1.03242	up	0.109539	0.162119	no
Jr13_17860_p1	109014804	O49453	VIT_01s0127g00840	Uncharacterized protein At4g28440	15248	6.7276e+06	6.74651e+06	7.59213e+06	3.1587e+06	3.59379e+06	3.54779e+06	7.02208e+06	3.43343e+06	2.04521	1.03225	up	2.064e-16	2.65741e-15	high
Jr09_13740_p1	108992561	Q9ZRA2	VIT_19s0014g01800	Homogentisate 1,2-dioxygenase	51573	500265	622738	678425	200192	358775	325141	600476	294703	2.03757	1.02685	up	6.68201e-05	0.000209752	high
Jr06_10240_p1	108984738	P29830	VIT_04s0008g01500	17.6 kDa class II heat shock protein	17586	47705.2	71994.3	45508	42095.5	25024.7	14521.4	55069.2	27213.9	2.02357	1.0169	up	0.0145022	0.0277902	med
Jr05_06670_p1	108987784	O22921	VIT_06s0004g07500	Probable WRKY transcription factor 25	68452	142409	109725	106100	64583.7	55247.1	57403.2	119412	59078	2.02125	1.01525	up	5.36684e-06	2.03791e-05	high
Jr10_00980_p1	109001908	Q9XF89	VIT_18s0089g01170	Chlorophyll a-b binding protein CP26, chloroplastic	31015	2.3183e+07	1.36944e+07	1.45653e+07	9.51808e+06	5.28093e+06	1.06645e+07	1.71475e+07	8.48783e+06	2.02025	1.01453	up	0.00110074	0.00270145	high
Jr06_09230_p1	109007127	Q9T030	VIT_03s0038g04670	Isoflavone reductase homolog PCBER1	34157	2.56441e+07	2.60048e+07	2.97688e+07	1.30085e+07	1.272e+07	1.46076e+07	2.71393e+07	1.34454e+07	2.01848	1.01327	up	9.25131e-15	1.02668e-13	high
Jr02_19800_p1	109011384	Q9SU40	VIT_02s0154g00080	Monocopper oxidase-like protein SKU5	66183	193370	270407	219961	192351	83831.8	62683	227913	112955	2.01773	1.01273	up	0.0165001	0.0311226	med
Jr12_20310_p1 (+1)	#N/A	F4I171	VIT_13s0067g02320	Mediator of RNA polymerase II transcription subunit 15a	68540	117047	82633.6	133983	13504.5	72510.5	79404.9	111221	55140	2.01707	1.01226	up	0.0873998	0.133861	no
Jr16_02330_p1	109012488	Q9ZSY2	VIT_01s0011g03790	Chaperone protein dnaJ 15 (AtDjB15; AtJ15)	45380	369844	391625	351661	166522	191804	194456	371044	184261	2.01369	1.00984	up	5.68421e-09	3.23578e-08	high
Jr11_06390_p1 (+1)	108980317	Q8VZ10	VIT_03s0017g00460	Protein SUPPRESSOR OF QUENCHING 1, chloroplastic	21557	245722	351353	244889	219804	97200.2	101768	280655	139591	2.01055	1.00759	up	0.00553581	0.0117037	med
Jr04_13470_p1	108996410	Q9S9W2	VIT_00s0516g00030	Short-chain dehydrogenase/reductase SDRA	27007	1.29011e+07	1.46328e+07	1.47503e+07	6.91131e+06	7.15486e+06	6.96972e+06	1.40947e+07	7.01196e+06	2.0101	1.00727	up	3.12557e-17	4.38377e-16	high
Jr02_00270_p1	109000282	Q9FMU6	VIT_14s0068g01260	Mitochondrial phosphate carrier protein 3, mitochondrial	43816	155256	154142	185231	90897.5	81939.7	73922.4	164876	82253.2	2.0045	1.00324	up	1.10834e-06	4.72585e-06	high
Jr10_15540_p1	109008001	Q9SIV2	VIT_12s0028g03130	26S proteasome non-ATPase regulatory subunit 2 homolog A	97343	86789.3	119672	137284	81316	57691.4	32610.3	114582	57205.9	2.00297	1.00214	up	0.00637082	0.0132397	med
Jr15_07570_p1 (+4)	109020222	P20115	VIT_13s0156g00180	Citrate synthase 4, mitochondrial	52637	1.78676e+07	1.77206e+07	1.92395e+07	8.92835e+06	9.06183e+06	9.40438e+06	1.82759e+07	9.13152e+06	2.00141	1.00102	up	2.66412e-18	4.06525e-17	high
Jr10_21660_p1	109011221	Q38884	VIT_11s0016g04710	Eukaryotic translation initiation factor 3 subunit I (eIF3i)	38261	4.79224e+06	5.14429e+06	4.90849e+06	2.56111e+06	2.45357e+06	2.42104e+06	4.94834e+06	2.47857e+06	1.99645	0.997437	up	8.42923e-18	1.2403e-16	high
Jr12_17340_p1	109005306	Q94AM9	VIT_09s0002g01560	Polyadenylate-binding protein-interacting protein 4 (PABP-interacting protein 4; Poly(A)-binding protein-interacting protein 4)	70412	79455	113631	72325.5	60865.5	33601.4	38521	88470.6	44329.3	1.99576	0.996934	up	0.00162871	0.00386202	high
Jr04_07980_p1	108986027	Q9SVG3	VIT_10s0003g05450	Berberine bridge enzyme-like 21 (AtBBE-like 21)	62078	8.68517e+06	7.52102e+06	9.56122e+06	3.09806e+06	5.09238e+06	4.72071e+06	8.58914e+06	4.30372e+06	1.99575	0.99693	up	2.05939e-06	8.40069e-06	high
Jr01_03540_p1	108992874	Q8L970	VIT_14s0066g02170	Probable prolyl 4-hydroxylase 7 (AtP4H7)	35263	1.02718e+06	1.07732e+06	889324	516619	500437	486034	997940	501030	1.99178	0.994056	up	3.79464e-11	2.82328e-10	high
Jr08_20470_p1	108987726	Q38858	VIT_07s0005g01390	Calreticulin-2	48553	3.34165e+06	3.09412e+06	3.52124e+06	1.82867e+06	1.81932e+06	1.35655e+06	3.319e+06	1.66818e+06	1.9896	0.992476	up	1.08367e-09	6.74582e-09	high
Jr01_01830_p1	109001370	Q9XF89	VIT_18s0089g01170	Chlorophyll a-b binding protein CP26, chloroplastic	37342	2.97853e+07	1.61324e+07	1.71851e+07	8.23e+06	8.04e+06	1.54493e+07	2.10342e+07	1.05731e+07	1.98941	0.99234	up	0.00331132	0.0073004	high
Jr12_23650_p1	108983353	Q9LZM4	VIT_13s0019g02300	Wall-associated receptor kinase-like 20	69230	75745.9	79174.6	84973.3	31661.5	43482.1	45640.2	79964.6	40261.3	1.98614	0.989966	up	2.50236e-05	8.51163e-05	high
Jr11_08240_p1_family	108997690	Q8VYV7	VIT_04s0023g03820	3-dehydroquinate synthase, chloroplastic	49119	1.40114e+07	1.45334e+07	1.52547e+07	6.75295e+06	7.36521e+06	7.97013e+06	1.45998e+07	7.36276e+06	1.98293	0.987632	up	1.46101e-15	1.79015e-14	high
Jr08_07200_p1	109001155	P48349	VIT_18s0001g07240	14-3-3-like protein GF14 lambda	30069	1.25085e+07	1.43503e+07	1.34022e+07	6.45128e+06	7.2796e+06	6.6004e+06	1.34204e+07	6.77709e+06	1.98025	0.985684	up	1.7893e-15	2.15238e-14	high
Jr14_06250_p2	109008517	Q0PGJ6	VIT_18s0001g08960	NADPH-dependent aldo-keto reductase, chloroplastic (AtChlAKR)	35834	5.36484e+06	5.47366e+06	4.72426e+06	2.62512e+06	2.57985e+06	2.66288e+06	5.18759e+06	2.62261e+06	1.97802	0.98406	up	8.92622e-16	1.11442e-14	high
Jr14_10400_p1	109013153	Q9LHT0	VIT_13s0019g02180	Tropinone reductase homolog At5g06060	27772	1.148e+07	1.25566e+07	1.24222e+07	5.69762e+06	5.96628e+06	6.7807e+06	1.21529e+07	6.1482e+06	1.97666	0.983068	up	7.97321e-15	8.99989e-14	high
Jr07_38470_p1	108991901	Q9SPE6	VIT_13s0067g02210	Alpha-soluble NSF attachment protein 2 (Alpha-SNAP2)	32718	2.87326e+06	3.15023e+06	2.83191e+06	1.60109e+06	1.51409e+06	1.36929e+06	2.9518e+06	1.49482e+06	1.97468	0.981619	up	2.5349e-13	2.36018e-12	high
Jr10_16760_p1	108984493	Q9LXT3	VIT_12s0028g02020	Multiprotein-bridging factor 1b	15604	1.29178e+06	1.22197e+06	1.82972e+06	575964	761334	865130	1.44782e+06	734142	1.97213	0.979754	up	1.88571e-05	6.54933e-05	high
Jr02_18330_p1	108984422	Q9C8S6	VIT_02s0025g04350	C2 domain-containing protein At1g63220	16344	1.73758e+06	2.03797e+06	2.05938e+06	1.11434e+06	907229	943236	1.94498e+06	988267	1.96807	0.976781	up	2.88473e-10	1.91309e-09	high
Jr12_22480_p1	109003000	Q9FQ24	VIT_13s0067g03320	Protein TONNEAU 1b	29765	246959	278033	296364	175786	127118	115520	273785	139475	1.96297	0.97304	up	1.8487e-05	6.42755e-05	high
Jr12_20950_p1 (+1)	109010978	Q8L831	VIT_09s0018g01600	Nudix hydrolase 3 (AtNUDT3)	88732	1.02063e+07	1.14204e+07	1.192e+07	5.50641e+06	6.172e+06	5.41388e+06	1.11823e+07	5.69743e+06	1.96268	0.972828	up	2.86414e-14	2.94087e-13	high
Jr16_10200_p1 (+1)	109016131	Q8S528	VIT_01s0026g00220	Aldehyde dehydrogenase family 2 member B7, mitochondrial (ALDH2b)	58582	6.4954e+07	7.58602e+07	6.02012e+07	3.57018e+07	3.33976e+07	3.34441e+07	6.70052e+07	3.41812e+07	1.96029	0.97107	up	1.82085e-12	1.56156e-11	high
Jr02_15620_p1	109002075	O81629	VIT_02s0025g02090	Protein KINESIN LIGHT CHAIN-RELATED 1	66436	39822.1	42361.6	41515.6	12597.7	25936.9	24914.2	41233.1	21149.6	1.94959	0.963166	up	0.00239511	0.00545185	high
Jr14_07030_p1	108989165	Q8L7B2	VIT_07s0141g00520	Serine carboxypeptidase-like 20	55500	1.87862e+07	2.24434e+07	1.98955e+07	9.89797e+06	1.04153e+07	1.11121e+07	2.03751e+07	1.04751e+07	1.94509	0.959837	up	9.78724e-14	9.57233e-13	high
Jr02_13720_p1	109008326	Q9C6T1	VIT_02s0012g02530	Phosphomevalonate kinase, peroxisomal	54754	9.61546e+06	1.08442e+07	1.08064e+07	5.55945e+06	5.30743e+06	5.22296e+06	1.0422e+07	5.36328e+06	1.94322	0.958447	up	7.21083e-16	9.07134e-15	high
Jr10_06200_p1 (+1)	108984074	Q9SRZ6	VIT_04s0079g00530	Cytosolic isocitrate dehydrogenase [NADP]	46001	1.80006e+07	2.09852e+07	2.00938e+07	1.01415e+07	1.0353e+07	9.91122e+06	1.96932e+07	1.01353e+07	1.94304	0.958316	up	2.49159e-15	2.96472e-14	high
Jr16_05340_p1	109007551	Q42342	VIT_16s0098g01230	Cytochrome b5 isoform E (AtCb5-E)	15076	4.87225e+06	3.13139e+06	3.64751e+06	1.46953e+06	1.91434e+06	2.62117e+06	3.88372e+06	2.00168e+06	1.94023	0.956227	up	0.000188693	0.000542225	high
Jr02_07070_p1	108994221	Q9SD81	VIT_17s0000g07450	Glycerophosphodiester phosphodiesterase GDPD6	46634	1.16867e+07	1.37116e+07	1.22617e+07	7.20123e+06	6.61847e+06	5.60345e+06	1.25533e+07	6.47439e+06	1.93892	0.955253	up	3.69668e-11	2.75662e-10	high
Jr03_20990_p1 (+1)	109019125	Q9SJL8	VIT_06s0061g00500	S-adenosylmethionine synthase 3 (AdoMet synthase 3)	42762	4.00752e+06	4.31597e+06	4.64607e+06	2.11209e+06	2.19868e+06	2.37954e+06	4.32319e+06	2.2301e+06	1.93856	0.954986	up	1.12086e-13	1.08338e-12	high
Jr08_16680_p1	109019776	Q94K80	VIT_00s0349g00060	La-related protein 1C (AtLARP1c)	55306	411385	536322	512635	201814	276878	274900	486781	251197	1.93784	0.954452	up	4.42242e-06	1.70978e-05	high
Jr16_20460_p1 (+1)	108995744	P47924	VIT_03s0017g00650	GTP cyclohydrolase-2 (AtRIBA1; DHBP synthase)	60768	205578	278112	214797	144112	113572	103148	232829	120278	1.93576	0.952903	up	3.34568e-05	0.000111051	high
Jr13_04330_p1	109007675	Q9LFE4	No Vitis hit	WEB family protein At5g16730, chloroplastic	17457	2.55397e+06	2.58751e+06	2.68044e+06	1.28692e+06	1.34663e+06	1.40921e+06	2.60731e+06	1.34759e+06	1.9348	0.952183	up	2.74671e-14	2.83798e-13	high
Jr06_07210_p1	108987609	O48723	VIT_18s0001g10910	Patatin-like protein 2 (AtPLP2)	44843	1.30516e+06	1.20552e+06	689783	569959	513273	572199	1.06682e+06	551811	1.93331	0.951072	up	0.000146684	0.000431669	high
Jr08_18400_p1 (+1)	109006463	Q8S8F9	VIT_00s1364g00010	Nicotinamidase 1 (AtNIC1)	26772	870593	584845	630547	282091	329518	467823	695328	359811	1.93248	0.950456	up	0.000184875	0.000533113	high
Jr14_04190_p1	109015670	O22149	VIT_15s0048g00510	Pectinesterase 17	57076	467566	681613	451245	456521	218917	153480	533475	276306	1.93074	0.949153	up	0.0197237	0.036522	med
Jr12_22090_p1_family	109008978	P57720	VIT_13s0019g04190	Chorismate synthase, chloroplastic	48193	1.21582e+07	1.38337e+07	1.21306e+07	6.81908e+06	6.29147e+06	6.6781e+06	1.27075e+07	6.59622e+06	1.92649	0.945972	up	7.22763e-15	8.243e-14	high
Jr04_05270_p1	108990546	Q9FK60	VIT_08s0007g07280	Superoxide dismutase [Cu-Zn] 3	15999	694276	539721	1.11282e+06	191996	507844	519786	782271	406542	1.92421	0.944264	up	0.0263314	0.0470908	med
Jr09_05820_p1 (+1)	108994352	Q0WQE7	VIT_02s0488g00020	AUGMIN subunit 3	39279	1.79653e+06	2.47039e+06	1.70938e+06	1.2468e+06	924620	934550	1.9921e+06	1.03532e+06	1.92413	0.944208	up	5.58278e-06	2.11504e-05	high
Jr01_12900_p1	108998593	Q9LSY6	VIT_06s0004g06390	UDP-glycosyltransferase 71B6	53495	4.49119e+06	5.35024e+06	6.04031e+06	2.96706e+06	3.03732e+06	2.26066e+06	5.29391e+06	2.75501e+06	1.92156	0.942275	up	8.32862e-08	4.18462e-07	high
Jr04_05690_p1	108992582	Q8RXE7	VIT_08s0056g00910	Probable ADP-ribosylation factor GTPase-activating protein AGD14 (ARF GAP AGD14)	77227	216264	242864	243945	75085.8	149969	140832	234358	121963	1.92156	0.942274	up	0.00116944	0.00285518	high
Jr11_03220_p1 (+2)	109012711	O82631	VIT_14s0060g02220	F-actin-capping protein subunit alpha	34276	216049	224629	240296	132506	110089	112069	226991	118221	1.92006	0.941147	up	6.82159e-07	2.96232e-06	high
Jr01_08670_p1 (+1)	108988098	O81629	VIT_14s0006g00410	Protein KINESIN LIGHT CHAIN-RELATED 1	62764	124375	115361	159636	70733.5	65859.4	71408.9	133124	69333.9	1.92004	0.941133	up	1.7229e-05	6.03474e-05	high
Jr04_21190_p1 (+1)	#N/A	P54968	VIT_08s0007g02740	IAA-amino acid hydrolase ILR1	48840	90949.7	72915.1	96123.2	50303.2	40836.6	44702.5	86662.7	45280.8	1.91389	0.93651	up	3.31302e-05	0.000110189	high
Jr13_08670_p1	108993420	P45434	VIT_03s0038g01820	Translocon-associated protein subunit alpha (TRAP-alpha)	27935	115910	150600	99997.3	84937.2	56516.5	50290.5	122169	63914.7	1.91144	0.934658	up	0.00123301	0.00299263	high
Jr06_00140_p1	109020435	O23052	VIT_10s0071g00840	Uncharacterized TPR repeat-containing protein At1g05150	48385	357634	354547	523604	117117	279806	249640	411928	215521	1.91131	0.934563	up	0.00745752	0.0151916	med
Jr03_09040_p1	109004867	Q9C5E5	VIT_12s0057g00010	Diacylglycerol kinase 5 (AtDGK5; DAG kinase 5)	54351	1.18986e+07	1.30065e+07	1.2025e+07	6.13003e+06	6.97563e+06	6.22442e+06	1.23101e+07	6.44336e+06	1.9105	0.933952	up	1.51381e-14	1.63056e-13	high
Jr07_37790_p1	108991907	Q9S7W1	VIT_08s0007g02190	Chlorophyll a-b binding protein CP29.3, chloroplastic	31856	6.12489e+06	4.5147e+06	4.2446e+06	2.28744e+06	2.52918e+06	2.97716e+06	4.9614e+06	2.59793e+06	1.90975	0.933386	up	5.68044e-07	2.48642e-06	high
Jr01_23370_p1	109019209	P93836	VIT_12s0028g00710	4-hydroxyphenylpyruvate dioxygenase	57115	4.71188e+06	5.1832e+06	4.3041e+06	2.17887e+06	2.72566e+06	2.55133e+06	4.73306e+06	2.48529e+06	1.90443	0.92936	up	1.67679e-10	1.13952e-09	high
Jr13_01370_p1	108996303	Q5XF20	VIT_03s0180g00200	UDP-glycosyltransferase 84A1	56929	373263	410610	453011	223966	239890	185831	412295	216562	1.90381	0.928892	up	7.1487e-07	3.10028e-06	high
Jr08_18060_p1	108981712	P30185	VIT_04s0023g02480	Dehydrin Rab18	80052	38913.7	57865.1	53525.2	22071.5	29665.2	27263.7	50101.3	26333.5	1.90257	0.927947	up	0.000324482	0.000892733	high
Jr08_09150_p1	109018894	Q8VYI3	VIT_18s0001g00490	Enoyl-CoA hydratase 2, peroxisomal	34109	397789	401119	412917	150023	257832	229659	403942	212505	1.90086	0.926653	up	7.81619e-05	0.000241671	high
Jr06_02430_p1	109005403	P06525	VIT_04s0044g01120	Alcohol dehydrogenase class-P (AtADH)	41144	2.6712e+07	3.46984e+07	3.7679e+07	1.77369e+07	1.85155e+07	1.59406e+07	3.30298e+07	1.73977e+07	1.89852	0.924872	up	1.60442e-08	8.72636e-08	high
Jr04_06310_p1	108992597	Q8GUN2	VIT_08s0056g00710	Adenylylsulfatase HINT1	16220	2.47441e+07	2.40324e+07	3.06034e+07	1.17644e+07	1.35293e+07	1.65368e+07	2.64599e+07	1.39435e+07	1.89765	0.924214	up	1.2073e-07	5.93922e-07	high
Jr13_05420_p1	#N/A	Q93Y22	VIT_01s0011g01570	Coatomer subunit delta	58157	4.86457e+06	5.38244e+06	5.71371e+06	2.94323e+06	3.0953e+06	2.38291e+06	5.32024e+06	2.80715e+06	1.89525	0.922386	up	6.04907e-10	3.87894e-09	high
Jr07_28400_p1	108991291	Q0WPU1	VIT_09s0002g02090	Myosin-15	19844	97648	78853	64178.2	33700.3	40733.9	52609.3	80226.4	42347.8	1.89446	0.921788	up	0.000790183	0.00201115	high
Jr07_33810_p1 (+1)	109011342	Q9MA55	VIT_13s0019g05290	Acyl-CoA-binding domain-containing protein 4 (Acyl-CoA binding protein 4)	56554	1.27693e+06	1.37333e+06	1.23054e+06	679685	691186	678914	1.2936e+06	683261	1.89327	0.920881	up	1.2826e-11	1.00894e-10	high
Jr14_20070_p1	108998728	Q9C690	VIT_06s0004g01740	Transcription factor bHLH122	46104	20695.1	9472.63	11662.7	1068.74	10429.5	10640.9	13943.5	7379.72	1.88943	0.917943	up	0.219356	0.293901	no
Jr02_19280_p2	109010968	Q8GW78	VIT_02s0025g05110	ATP-dependent Clp protease ATP-binding subunit CLPT2, chloroplastic	26752	980686	1.15881e+06	1.00428e+06	665130	479258	521319	1.04793e+06	555236	1.88735	0.916365	up	3.92955e-07	1.77367e-06	high
Jr10_22300_p1	108986208	Q07488	VIT_11s0016g05520	Blue copper protein	17948	7.98694e+06	8.97322e+06	9.76225e+06	4.96908e+06	4.44604e+06	4.75087e+06	8.90747e+06	4.722e+06	1.88638	0.915618	up	2.25418e-12	1.91489e-11	high
Jr01_08110_p1	108988106	Q8W1X2	VIT_14s0006g01660	Pyridoxal kinase, N-terminally processed	38068	1.0688e+06	1.23943e+06	1.12901e+06	522896	649766	650455	1.14575e+06	607706	1.88536	0.914842	up	1.27612e-08	7.0336e-08	high
Jr02_24290_p1	108984106	Q94JQ4	VIT_19s0090g00390	Reactive Intermediate Deaminase A, chloroplastic	19944	2.14088e+07	1.12125e+07	1.28579e+07	6.30538e+06	6.56169e+06	1.1305e+07	1.51597e+07	8.05735e+06	1.88148	0.911869	up	0.00426309	0.00921992	high
Jr12_03420_p1	109012105	O80840	VIT_15s0046g03520	Phosphomannomutase (AtPMM)	28153	212115	242604	202118	138228	109358	101630	218946	116405	1.88089	0.911415	up	1.63384e-05	5.74107e-05	high
Jr04_17310_p1	108982978	Q8L7C9	VIT_19s0093g00310	Glutathione S-transferase U20 (AtGSTU20)	25600	3.90538e+06	4.16116e+06	5.01706e+06	2.38646e+06	2.67902e+06	1.89325e+06	4.3612e+06	2.31958e+06	1.88017	0.910862	up	2.73127e-07	1.26699e-06	high
Jr10_19990_p1	109018861	Q38905	VIT_11s0016g02940	Profilin-4	17814	1.41496e+06	1.68097e+06	1.46056e+06	739600	799941	889710	1.51883e+06	809750	1.87568	0.907413	up	2.7926e-09	1.66928e-08	high
Jr01_09120_p1	108988131	Q9SRZ6	VIT_04s0079g00530	Cytosolic isocitrate dehydrogenase [NADP]	46136	5.20188e+07	6.10327e+07	6.63171e+07	3.11586e+07	3.46342e+07	2.99868e+07	5.97895e+07	3.19265e+07	1.87272	0.905137	up	3.77935e-10	2.47649e-09	high
Jr16_04050_p1	108989566	Q9LFL3	VIT_19s0014g00550	TOM1-like protein 1	43729	1.8939e+06	2.53024e+06	1.78e+06	1.30881e+06	1.0591e+06	952467	2.06804e+06	1.10679e+06	1.8685	0.901881	up	6.25627e-06	2.35935e-05	high
Jr09_11770_p1	108990864	P54873	VIT_02s0025g04580	Hydroxymethylglutaryl-CoA synthase (HMG-CoA synthase)	51869	864899	963773	933401	505577	546175	428918	920691	493557	1.86542	0.899501	up	1.83179e-08	9.93023e-08	high
Jr09_07910_p1	108982250	Q9LFD5	VIT_02s0012g01860	Binding partner of ACD11 1	30278	7.17045e+06	7.93044e+06	7.70355e+06	4.22647e+06	3.96165e+06	4.04052e+06	7.60148e+06	4.07621e+06	1.86484	0.89905	up	7.72295e-15	8.74736e-14	high
Jr03_23220_p1	108981025	Q9ZSK3	VIT_06s0004g04280	Actin-depolymerizing factor 4 (ADF-4; AtADF4)	15985	299557	337378	312046	164222	168061	178745	316327	170342	1.857	0.892977	up	1.95212e-07	9.29796e-07	high
Jr08_00920_p1	109001023	Q93ZE8	VIT_04s0008g05820	Stromal cell-derived factor 2-like protein (AtSDF2; SDF2-like protein)	23887	7.56971e+06	8.3758e+06	7.8339e+06	4.37505e+06	3.9891e+06	4.46528e+06	7.92647e+06	4.27648e+06	1.8535	0.890256	up	9.95294e-14	9.70559e-13	high
Jr08_00570_p1 (+1)	109000990	Q8RXV3	VIT_04s0008g07320	Probable protein phosphatase 2C 59 (AtPP2C59)	31448	1.03553e+06	1.07298e+06	1.04752e+06	577421	573441	552723	1.05201e+06	567862	1.85258	0.889537	up	5.10987e-11	3.70157e-10	high
Jr13_06030_p1	109002346	Q9SX78	VIT_03s0063g00830	Probable carboxylesterase 2	38214	1.08448e+06	1.19617e+06	1.27731e+06	564884	664181	693239	1.18599e+06	640768	1.85088	0.888214	up	1.4783e-08	8.06701e-08	high
Jr14_05190_p1 (+3)	109014600	P42825	VIT_06s0080g01230	Chaperone protein dnaJ 2 (AtDjA2)	51202	1.75217e+06	1.80602e+06	1.90586e+06	1.03516e+06	1.02377e+06	894601	1.82135e+06	984510	1.85001	0.887529	up	1.43861e-10	9.85789e-10	high
Jr01_11610_p1	108998662	Q9LVB8	VIT_16s0022g02300	Probable carboxylesterase 120	42248	134290	162141	125921	70957.9	78894.7	78524.5	140784	76125.7	1.84936	0.887026	up	1.98476e-05	6.8716e-05	high
Jr01_12710_p1 (+2)	108998588	O81148	VIT_10s0042g00070	Proteasome subunit alpha type-4-A	27207	1.45925e+07	1.62751e+07	1.47015e+07	8.55011e+06	7.82438e+06	8.27344e+06	1.51897e+07	8.21598e+06	1.8488	0.886589	up	9.52703e-14	9.34557e-13	high
Jr11_01010_p1 (+1)	108979476	Q94BU8	VIT_14s0030g01610	Guanosine deaminase	20279	150325	141833	136158	58139	90366.5	83900.9	142772	77468.8	1.84296	0.882027	up	0.000199906	0.000570963	high
Jr10_04970_p1	108987060	Q96300	VIT_14s0006g03230	14-3-3-like protein GF14 nu	30002	2.23546e+07	3.1536e+07	2.38515e+07	1.71167e+07	1.28738e+07	1.22071e+07	2.5914e+07	1.40659e+07	1.84233	0.881534	up	7.46373e-06	2.77971e-05	high
Jr05_15120_p1 (+1)	108980890	Q9LY50	VIT_06s0004g01770	Putative serine/threonine-protein kinase-like protein CCR3	97014	3.1905e+06	3.94479e+06	3.26965e+06	2.09854e+06	1.7725e+06	1.77858e+06	3.46831e+06	1.8832e+06	1.84171	0.881046	up	4.89091e-09	2.81334e-08	high
Jr07_38720_p1 (+1)	108991875	Q8VXZ7	VIT_13s0067g02640	Alpha-galactosidase 3 (AtAGAL3)	47851	7.50274e+06	7.77745e+06	7.43312e+06	4.0417e+06	4.28811e+06	4.00797e+06	7.5711e+06	4.1126e+06	1.84095	0.880454	up	5.22711e-15	6.02397e-14	high
Jr11_02400_p1	108983826	P46086	VIT_14s0128g00330	Mevalonate kinase (MK)	47483	734388	858907	773191	473201	454420	359411	788829	429011	1.83872	0.878699	up	3.96644e-07	1.78355e-06	high
Jr12_08930_p1	108992750	Q8GYN5	VIT_05s0029g00690	RPM1-interacting protein 4	32459	137982	159710	154468	76364.1	89208.6	80850.8	150720	82141.2	1.83489	0.875694	up	9.23322e-06	3.38141e-05	high
Jr02_16290_p1	108987140	Q9T0A0	VIT_02s0025g01410	Long chain acyl-CoA synthetase 4	74106	155468	272315	210585	127694	121934	99938.7	212789	116522	1.82617	0.86882	up	0.000803179	0.00203637	high
Jr11_08790_p1	108995246	Q84M96	VIT_14s0030g01980	Probable aldo-keto reductase 2	38098	54161	66075.3	42719	28038.6	30855.6	30422.4	54318.4	29772.2	1.82447	0.867472	up	0.000410509	0.00110814	high
Jr11_27160_p1	109009508	Q8L860	VIT_04s0008g03720	TOM1-like protein 9	72807	1.42803e+06	1.48186e+06	1.4876e+06	772458	840148	802158	1.46583e+06	804921	1.82108	0.864797	up	6.64646e-11	4.70102e-10	high
Jr02_17800_p1	109014469	Q9LVW7	VIT_02s0025g03430	Carbamoyl-phosphate synthase small chain, chloroplastic	59647	52852.1	60428.1	50943.1	35189.6	32406.5	23179.5	54741.1	30258.5	1.80911	0.855278	up	0.000606779	0.00158098	high
Jr16_13630_p1	109015126	Q8RXT4	VIT_01s0010g02450	Serine/threonine-protein kinase Nek4	15229	1.22466e+06	936342	690351	485862	484802	606355	950451	525673	1.80806	0.854446	up	0.000310704	0.000856256	high
Jr01_34480_p1	109000754	Q8VZS6	VIT_12s0057g01290	GBF-interacting protein 1	86923	285000	244789	321980	104265	174399	192561	283923	157075	1.80756	0.854045	up	0.00176888	0.00415555	high
Jr02_07120_p1 (+2)	108994200	Q9C7F5	VIT_17s0000g05240	Nuclear transport factor 2B (AtNTF2b; NTF-2)	51252	1.0813e+07	1.12889e+07	1.0818e+07	6.25379e+06	6.00704e+06	5.95806e+06	1.09733e+07	6.07296e+06	1.80691	0.853524	up	1.73533e-14	1.85101e-13	high
Jr03_07870_p1	109004402	Q9S9Q9	VIT_10s0003g00490	BTB/POZ domain-containing protein At1g30440	19240	31773.3	95215.8	18699.9	18377.9	33715	28538.3	48563	26877.1	1.80686	0.853478	up	0.144623	0.205997	no
Jr08_13380_p1	108979494	Q1PDI2	VIT_07s0104g00220	Diacylglycerol kinase 4 (AtDGK4; DAG kinase 4)	32281	1.00197e+07	1.18432e+07	1.05276e+07	6.39256e+06	5.81751e+06	5.73468e+06	1.07968e+07	5.98158e+06	1.80501	0.852006	up	1.85909e-11	1.43503e-10	high
Jr07_26380_p1	108983060	O04130	VIT_09s0018g01870	D-3-phosphoglycerate dehydrogenase 2, chloroplastic (PGDH)	66900	2.33708e+06	2.73096e+06	2.18243e+06	1.48605e+06	1.30431e+06	1.2268e+06	2.41682e+06	1.33905e+06	1.80488	0.851899	up	3.25479e-08	1.71097e-07	high
Jr01_19230_p1	108985258	Q9SRV7	VIT_12s0059g02340	Putative syntaxin-131 (AtSYP131)	34490	984072	1.00108e+06	1.02838e+06	425150	591638	653944	1.00451e+06	556911	1.80372	0.850975	up	1.0298e-05	3.75467e-05	high
Jr06_10130_p1	108994687	Q70DU8	VIT_07s0031g02630	Aldehyde dehydrogenase family 3 member H1 (AtALDH4; Ath-ALDH4)	53113	867525	974196	1.13955e+06	453417	672284	528191	993757	551297	1.80258	0.850063	up	2.65517e-05	8.99427e-05	high
Jr13_08770_p1	108993368	Q9SLF3	VIT_03s0038g02070	Translocase of chloroplast 132, chloroplastic (AtToc132)	129305	93499.4	128773	97986.2	86628.4	45217.7	46057.4	106753	59301.2	1.80018	0.848138	up	0.00866083	0.0173427	med
Jr09_12890_p1	108985353	Q84VV6	VIT_02s0154g00530	Bifunctional adenosine 5'-phosphosulfate phosphorylase/adenylylsulfatase HINT4 (APS phosphorylase)	23543	4.44112e+06	5.08902e+06	4.35652e+06	2.72849e+06	2.46331e+06	2.52244e+06	4.62889e+06	2.57142e+06	1.80013	0.848103	up	4.44236e-11	3.26103e-10	high
Jr01_09130_p1	108988130	Q42521	VIT_01s0011g06600	Glutamate decarboxylase 1 (GAD 1)	56625	9.84823e+06	1.03899e+07	1.08898e+07	5.70504e+06	6.37801e+06	5.20899e+06	1.0376e+07	5.76401e+06	1.80013	0.848103	up	6.19808e-11	4.3933e-10	high
Jr05_09340_p1	109022242	Q9LQQ9	VIT_06s0004g03620	Mitogen-activated protein kinase 13 (AtMPK13; MAP kinase 13)	42742	26925.6	31298.6	31291.5	14627.8	18695.6	16443.5	29838.6	16589	1.7987	0.846946	up	0.000198004	0.000566019	high
Jr06_18270_p1	108985380	Q9FHQ6	VIT_17s0000g02240	Ubiquitin-related 4	11767	1.21635e+06	1.46619e+06	1.1923e+06	777577	723346	660125	1.29161e+06	720350	1.79304	0.842405	up	9.18647e-08	4.58767e-07	high
Jr05_06220_p1	108999408	P92994	VIT_06s0004g08150	Trans-cinnamate 4-monooxygenase	63408	275180	522756	397513	268689	218709	181089	398483	222829	1.78829	0.83858	up	0.00285286	0.006362	high
Jr12_02570_p1 (+1)	108998262	Q8LDD3	VIT_00s0199g00110	Protein CURVATURE THYLAKOID 1D, chloroplastic	24340	892369	786883	778274	378308	499788	497483	819176	458526	1.78654	0.837168	up	1.74058e-06	7.2163e-06	high
Jr07_35010_p1	108997109	Q01667	VIT_13s0019g04140	Chlorophyll a-b binding protein 6, chloroplastic	30746	2.82021e+06	1.1295e+06	1.24448e+06	1.14011e+06	732914	1.03675e+06	1.7314e+06	969925	1.78508	0.835989	up	0.0248537	0.0448129	med
Jr05_07750_p1 (+1)	#N/A	Q9ZW35	VIT_06s0004g05920	Proliferating cell nuclear antigen 2 (PCNA 2)	29597	532931	695971	526109	409741	293640	280288	585004	327890	1.78415	0.835235	up	0.000145634	0.000428963	high
Jr07_16860_p1	108987588	Q9ZW74	VIT_05s0124g00410	Plant UBX domain-containing protein 11 (PUX11)	58490	64236.5	86821.1	69029.5	49765	38760	34911.4	73362.3	41145.5	1.783	0.834303	up	0.000799335	0.00202974	high
Jr07_13440_p1	108988454	Q56WD9	VIT_05s0051g00720	3-ketoacyl-CoA thiolase 2, peroxisomal	48620	1.02358e+07	1.06226e+07	7.95768e+06	4.78789e+06	5.60552e+06	5.8015e+06	9.60535e+06	5.3983e+06	1.77933	0.831332	up	1.58336e-07	7.68593e-07	high
Jr08_11900_p1	108989023	Q9SQR3	VIT_07s0005g00700	Strigolactone esterase D14	35831	1.49253e+06	1.4973e+06	1.81243e+06	852423	1.0283e+06	821560	1.60075e+06	900760	1.77711	0.829536	up	4.1799e-07	1.86933e-06	high
Jr05_13650_p1_family	109004037	P94014	VIT_14s0060g00120	Germin-like protein subfamily 2 member 1	22698	1.21724e+07	1.32657e+07	1.44927e+07	8.56427e+06	7.62331e+06	6.29178e+06	1.33103e+07	7.49312e+06	1.77633	0.828903	up	9.36803e-08	4.65964e-07	high
Jr11_18300_p1	109011491	Q9FFH5	VIT_18s0122g00950	Prohibitin-7, mitochondrial (Atphb7)	24035	217131	137914	284584	69063.6	135386	155737	213210	120062	1.77582	0.828489	up	0.0301567	0.0531249	low
Jr13_01100_p1	109003390	Q9FMH8	VIT_18s0001g09990	Probable cysteine protease RD21B	51271	469654	554328	502108	269166	315319	276374	508697	286953	1.77275	0.82599	up	7.93391e-07	3.42728e-06	high
Jr04_09930_p1 (+1)	109016986	Q76E23	VIT_15s0021g00980	Eukaryotic translation initiation factor 4G (eIF-4G; eIF4G)	207351	88919.8	119814	81382.2	74955.8	45947.6	42946.5	96705.2	54616.6	1.77062	0.824252	up	0.0063036	0.0131166	med
Jr07_11640_p1	109021206	Q6NL24	VIT_05s0077g00860	Probable enoyl-CoA hydratase 1, peroxisomal	32409	7.36146e+06	7.83515e+06	7.191e+06	4.23724e+06	4.19466e+06	4.21224e+06	7.46254e+06	4.21472e+06	1.77059	0.824231	up	2.45081e-13	2.29485e-12	high
Jr04_07660_p1	108981971	F4KD38	VIT_12s0028g01190	DNA-directed RNA polymerase III subunit 2	38186	233097	219336	257227	128270	136524	136228	236553	133674	1.76963	0.823447	up	5.45428e-06	2.06873e-05	high
Jr08_16640_p1	109006165	F4JZ24	VIT_00s0264g00040	Probable prolyl 4-hydroxylase 10 (AtP4H10)	32327	163611	166955	197877	72514	117772	108586	176147	99623.9	1.76812	0.822219	up	0.000910393	0.00226979	high
Jr15_11310_p1	108993156	P98205	VIT_17s0119g00350	Phospholipid-transporting ATPase 2 (AtALA2)	61576	1.44257e+06	1.46234e+06	1.65725e+06	764846	968321	847492	1.52072e+06	860220	1.76783	0.821977	up	1.28982e-07	6.33567e-07	high
Jr13_21260_p1	108991781	Q9LIN5	VIT_01s0137g00690	Eukaryotic translation initiation factor 4B1 (AtTif4B1; eIF4B1)	60615	2.0828e+06	2.38337e+06	1.97724e+06	1.1771e+06	1.2631e+06	1.20841e+06	2.1478e+06	1.2162e+06	1.76599	0.820476	up	3.70491e-09	2.16131e-08	high
Jr09_15670_p1	108993979	Q9ZNW0	VIT_19s0090g01020	Molybdopterin-synthase sulfurtransferase	50872	271325	301717	280025	180431	166619	136020	284356	161023	1.76593	0.820427	up	2.18576e-05	7.52012e-05	high
Jr01_25890_p1	109008800	Q9SKI2	VIT_11s0016g01440	Vacuolar protein sorting-associated protein 2 homolog 1 (AtVPS2-1)	25185	126266	119257	83850.9	55783.2	69549.8	61183	109791	62172	1.76593	0.820424	up	0.00076894	0.00196011	high
Jr11_14410_p1	109002259	Q96266	VIT_07s0005g00030	Glutathione S-transferase F8, chloroplastic (AtGSTF8)	24044	8.99965e+07	1.07758e+08	1.02389e+08	4.54295e+07	5.3828e+07	7.07688e+07	1.00048e+08	5.66755e+07	1.76527	0.819892	up	1.56872e-05	5.52405e-05	high
Jr01_00860_p1	109001287	Q94JS0	VIT_14s0068g01030	Cytochrome b-c1 complex subunit Rieske-1, mitochondrial	31062	2.54607e+06	1.91129e+06	2.82792e+06	611256	1.70784e+06	1.8146e+06	2.42843e+06	1.3779e+06	1.76241	0.817551	up	0.0369451	0.0632577	low
Jr01_18510_p1	109001804	Q7Y175	VIT_12s0059g01200	Plant UBX domain-containing protein 5 (PUX5)	47140	135783	140993	119515	57057.8	86468.2	81416	132097	74980.7	1.76175	0.817005	up	0.000598148	0.0015622	high
Jr11_13320_p1	109010940	Q9LYU4	VIT_07s0104g00800	4-substituted benzoates-glutamate ligase GH3.12	64660	145777	167360	158970	93130.9	99806.6	75267.5	157369	89401.7	1.76025	0.815776	up	9.68709e-05	0.000295636	high
Jr16_07350_p1 (+1)	108993476	Q9SKC9	VIT_01s0137g00010	NADH dehydrogenase [ubiquinone] 1 beta subcomplex subunit 7	17588	393562	266185	291420	134353	173730	233393	317056	180492	1.75662	0.812799	up	0.00262843	0.00591351	high
Jr11_22360_p1	108985058	Q8H103	VIT_18s0001g07280	Glucose-6-phosphate isomerase 1, chloroplastic (GPI 1)	68533	1.40992e+07	1.67375e+07	1.64277e+07	9.89514e+06	1.00757e+07	6.97487e+06	1.57548e+07	8.98191e+06	1.75406	0.810701	up	4.32777e-06	1.67619e-05	high
Jr06_10200_p1	108994675	Q8VWQ5	VIT_04s0008g01470	Probable WRKY transcription factor 50	18792	152593	162122	194753	68072.2	110575	111968	169823	96871.8	1.75307	0.80988	up	0.00193224	0.00448497	high
Jr07_31730_p1	108980358	Q9M8L4	VIT_09s0002g07860	Glycerol kinase (Glycerokinase)	56551	3.71896e+06	4.2498e+06	3.70054e+06	2.35758e+06	2.29491e+06	2.01856e+06	3.88977e+06	2.22368e+06	1.74924	0.806732	up	2.27589e-09	1.37387e-08	high
Jr04_10780_p1	108990272	Q940S5	VIT_10s0003g02760	Coatomer subunit zeta-1	19453	174876	155029	129460	84786.8	85930	92282.6	153122	87666.5	1.74664	0.804582	up	0.000115069	0.000346678	high
Jr06_02420_p1	109005404	P06525	VIT_04s0044g01120	Alcohol dehydrogenase class-P (AtADH)	41251	1.33065e+06	1.86244e+06	1.99046e+06	589648	1.282e+06	1.09922e+06	1.72785e+06	990288	1.74479	0.803057	up	0.00853462	0.0171212	med
Jr13_04260_p1	108990883	O22049	VIT_12s0142g00430	Ubiquinol oxidase 2, mitochondrial	39041	793200	879454	878424	446831	537338	488307	850360	490825	1.73251	0.792863	up	2.12341e-07	1.00126e-06	high
Jr10_04650_p1	108987056	P82873	VIT_14s0068g02030	Mitochondrial import receptor subunit TOM20-2	22756	72131.2	61288.6	60858	32627.7	31876.2	47659.9	64759.3	37388	1.73209	0.792512	up	0.00169897	0.00401131	high
Jr09_05000_p1	108994409	O23034	VIT_17s0000g01380	Ubiquitin-like modifier-activating enzyme 5 (Ubiquitin-activating enzyme 5)	52610	978146	1.23883e+06	1.01261e+06	748865	620422	501629	1.07653e+06	623639	1.7262	0.787603	up	7.6017e-05	0.000235481	high
Jr07_12960_p1 (+1)	109005664	Q94BU8	VIT_14s0030g01610	Guanosine deaminase	20348	2.3192e+06	2.27334e+06	2.29573e+06	1.09716e+06	1.47223e+06	1.42218e+06	2.29609e+06	1.33052e+06	1.72571	0.787187	up	5.25918e-07	2.32051e-06	high
Jr08_15000_p1	108991140	Q9ZSY2	VIT_14s0036g00470	Chaperone protein dnaJ 15 (AtDjB15; AtJ15)	32203	41245.5	52522.7	67990.2	11401.6	45143.7	37221.5	53919.5	31255.6	1.72512	0.78669	up	0.108439	0.160637	no
Jr10_08940_p1 (+1)	108996742	O03982	VIT_16s0050g00140	Heavy metal-associated isoprenylated plant protein 39 (AtHIP39)	12345	1.407e+06	1.85925e+06	2.24567e+06	1.10767e+06	1.05724e+06	1.032e+06	1.83731e+06	1.06564e+06	1.72414	0.785878	up	4.6049e-05	0.00014983	high
Jr09_09520_p1	108993762	Q9SU50	VIT_02s0025g02170	Trehalase	71059	1.13085e+06	1.14564e+06	1.20296e+06	692178	856123	470353	1.15981e+06	672885	1.72364	0.785462	up	0.000582306	0.00152687	high
Jr07_29870_p1	109003711	Q9CA90	VIT_09s0002g04300	Glyoxylate/hydroxypyruvate reductase A HPR2	34207	1.23195e+06	1.0552e+06	1.25798e+06	496595	810182	755906	1.18171e+06	687561	1.7187	0.781317	up	0.000294289	0.000815106	high
Jr10_16550_p1	108996646	P46643	VIT_12s0028g01820	Aspartate aminotransferase, mitochondrial	51710	4.39825e+06	4.67876e+06	4.38586e+06	2.66209e+06	2.49447e+06	2.68159e+06	4.48763e+06	2.61272e+06	1.71761	0.780402	up	3.04234e-11	2.2999e-10	high
Jr02_24140_p1	108984045	Q93W34	VIT_19s0090g00280	Polyadenylate-binding protein RBP45C (Poly(A)-binding protein RBP45C)	44852	923920	891874	979616	447325	573093	607989	931803	542802	1.71665	0.779597	up	4.77042e-06	1.82617e-05	high
Jr05_12870_p1	109011781	Q8W4D0	VIT_06s0061g01590	Peptidyl-prolyl cis-trans isomerase CYP71 (PPIase CYP71)	69905	68746.9	113668	68190.2	53559.6	49027.9	43485.4	83535.1	48690.9	1.71562	0.778727	up	0.00504433	0.0107127	med
Jr14_01010_p1	109019505	Q9FNA3	VIT_13s0064g00370	Alpha-N-acetylglucosaminidase	95003	449318	510953	495759	261584	292822	294800	485343	283069	1.71458	0.777853	up	1.58367e-06	6.6325e-06	high
Jr02_19440_p1 (+2)	109011078	Q9C5X3	VIT_13s0019g05000	SNARE-interacting protein KEULE	75359	24106.3	23006.6	25784.2	5600.23	19694.7	17302.8	24299	14199.2	1.71129	0.775081	up	0.0821219	0.127137	no
Jr15_08460_p1	109012207	Q949Y5	VIT_16s0039g00370	Probable zinc metalloprotease EGY1, chloroplastic	16705	1.05676e+06	967070	1.06625e+06	532088	639283	635204	1.03003e+06	602192	1.71046	0.774388	up	3.6004e-07	1.64362e-06	high
Jr07_25190_p1 (+1)	109013645	Q93YZ7	VIT_05s0094g01110	Acetolactate synthase small subunit 2, chloroplastic	53400	548298	488472	603141	221210	394747	343847	546637	319935	1.70859	0.772804	up	0.0014913	0.00356699	high
Jr14_17560_p1	109000676	Q9C6K5	VIT_13s0073g00580	Sm-like protein LSM3B (AtLSM3B)	29169	683295	434884	557954	160360	311866	509600	558711	327275	1.70716	0.7716	up	0.0556656	0.0910088	low
Jr07_20290_p1 (+4)	109010478	Q8L4B2	VIT_14s0128g00250	Nuclear transcription factor Y subunit C-9 (AtNF-YC-9)	29059	521682	357988	507880	244194	274248	295600	462517	271347	1.70452	0.769365	up	0.000213868	0.000606917	high
Jr02_21570_p1	109012841	O49453	VIT_12s0028g03180	Uncharacterized protein At4g28440	16717	273286	362505	368205	193520	190153	205356	334665	196343	1.70449	0.76934	up	7.17447e-05	0.000223718	high
Jr13_18580_p1	108996990	Q84TF0	VIT_01s0011g06500	Aldo-keto reductase family 4 member C10	35729	5.92678e+06	6.2057e+06	5.62086e+06	3.28527e+06	3.4561e+06	3.68292e+06	5.91778e+06	3.47476e+06	1.70308	0.768142	up	9.62582e-11	6.66527e-10	high
Jr01_17830_p1	109006041	Q8LDV3	VIT_07s0005g05850	Uncharacterized protein At4g13200, chloroplastic	23550	4.29285e+06	3.06469e+06	4.14591e+06	1.47448e+06	2.6462e+06	2.63394e+06	3.83448e+06	2.25154e+06	1.70305	0.768117	up	0.00281451	0.0062935	high
Jr01_29550_p1 (+1)	109006261	Q94A82	VIT_11s0016g04950	Nudix hydrolase 19, chloroplastic (AtNUDT19)	51092	534150	512512	528265	263730	338433	322893	524976	308352	1.70252	0.767673	up	5.99798e-06	2.26453e-05	high
Jr11_08320_p1	108997712	Q94K80	VIT_00s0349g00060	La-related protein 1C (AtLARP1c)	57567	42417	44420.2	47102.2	21893	29656.3	27140.2	44646.5	26229.8	1.70213	0.767335	up	0.00075333	0.00192927	high
Jr05_16420_p1	109009682	O65595	VIT_06s0004g00130	Probable pyruvate kinase, cytosolic isozyme (PK)	54010	3.33509e+06	4.03365e+06	3.43875e+06	2.33389e+06	2.06026e+06	1.95721e+06	3.60249e+06	2.11712e+06	1.7016	0.766893	up	9.86669e-08	4.89032e-07	high
Jr05_04770_p1	109019927	P04778	VIT_19s0014g00160	Chlorophyll a-b binding protein 1, chloroplastic	28417	2.59019e+06	1.61627e+06	1.6943e+06	1.049e+06	945132	1.4764e+06	1.96692e+06	1.15684e+06	1.70025	0.765746	up	0.00244973	0.005557	high
Jr03_05110_p1	109005246	Q9M2M0	VIT_08s0007g06060	Probable glucan endo-1,3-beta-glucosidase BG1	37542	7.18638e+07	7.22558e+07	9.73211e+07	5.38677e+07	5.04623e+07	3.79308e+07	8.04802e+07	4.74203e+07	1.69717	0.76313	up	9.05077e-05	0.000277759	high
Jr08_08580_p1 (+1)	#N/A	Q84WL9	VIT_18s0001g14240	AP-2 complex subunit sigma	16920	366137	420763	448951	252139	263958	212288	411950	242795	1.6967	0.762732	up	2.99971e-05	0.00010058	high
Jr07_21560_p1	109014341	Q84JN1	VIT_05s0094g00490	5'-adenylylsulfate reductase-like 7	18028	543313	728320	579649	440066	313373	337693	617094	363711	1.69666	0.762699	up	0.000224939	0.000635304	high
Jr10_22320_p1	108986194	Q9LVZ8	VIT_09s0002g06920	Protein LURP-one-related 12	25778	66131.2	94841.1	57104.2	45864.6	41425.3	41284.3	72692.2	42858	1.69612	0.762232	up	0.00329949	0.00728101	high
Jr15_07480_p1	109020152	Q9XI01	VIT_18s0001g02510	Protein disulfide isomerase-like 1-1 (AtPDIL1-1)	58898	3.48334e+08	3.88379e+08	3.83323e+08	2.13697e+08	2.23148e+08	2.23895e+08	3.73345e+08	2.20246e+08	1.69512	0.761391	up	8.00369e-10	5.08288e-09	high
Jr03_07840_p1	109004398	Q9T003	VIT_10s0003g00460	Acetylserotonin O-methyltransferase	40749	564580	712450	564885	435509	351769	299519	613972	362266	1.69481	0.761124	up	0.00019139	0.000548541	high
Jr05_08000_p1	109017833	Q9C977	VIT_06s0004g05490	Pentatricopeptide repeat-containing protein At1g80270, mitochondrial	48866	266106	310000	266644	182317	156404	159203	280917	165975	1.69252	0.759176	up	3.57446e-05	0.00011805	high
Jr14_15400_p1	109014003	Q8VWF6	VIT_06s0009g00850	Protein STRICTOSIDINE SYNTHASE-LIKE 3 (AtSSL3)	44010	456893	463285	526266	235839	339903	279671	482148	285138	1.69093	0.757818	up	0.000104608	0.000317192	high
Jr01_23160_p1 (+1)	109009609	Q9SCL7	VIT_04s0008g03050	Acetylglutamate kinase, chloroplastic	41038	5.78471e+06	7.0488e+06	5.91774e+06	3.59568e+06	3.69196e+06	3.80709e+06	6.25042e+06	3.69824e+06	1.6901	0.757112	up	5.00907e-09	2.87128e-08	high
Jr04_02150_p1 (+1)	#N/A	Q9FGX1	VIT_05s0077g00950	ATP-citrate synthase beta chain protein 2 (ATP-citrate synthase B-2)	65880	3.49593e+06	4.14827e+06	4.59288e+06	2.57759e+06	2.60558e+06	2.05847e+06	4.07903e+06	2.41388e+06	1.68982	0.75687	up	3.82894e-06	1.49351e-05	high
Jr01_18590_p1	108983016	F4IAG2	VIT_12s0059g01100	Starch synthase 3, chloroplastic/amyloplastic (AtSS3)	63853	20587.5	15854.5	25075.9	10595.4	13912.5	12015.4	20506	12174.4	1.68435	0.752184	up	0.00482621	0.0102893	med
Jr03_00260_p1	108983588	Q9LU39	VIT_08s0007g07350	Glutamyl-tRNA reductase-binding protein, chloroplastic (AtGluTRBP; GluTR-binding protein)	36760	1.27794e+07	1.50665e+07	1.34037e+07	6.86314e+06	9.50385e+06	8.14406e+06	1.37499e+07	8.17035e+06	1.6829	0.750948	up	1.92528e-06	7.9025e-06	high
Jr07_23690_p1	109007159	Q84MB3	VIT_05s0049g00280	1-aminocyclopropane-1-carboxylate oxidase homolog 1	44790	368600	362159	411071	97508.9	289944	292098	380610	226517	1.68027	0.748694	up	0.0591041	0.0958697	low
Jr16_19100_p1	109016786	P19171	VIT_04s0008g00120	Basic endochitinase B	35205	1.21136e+06	1.20896e+06	1.15931e+06	642731	839543	648274	1.19321e+06	710183	1.68015	0.74859	up	4.47832e-06	1.72687e-05	high
Jr13_01410_p1	108996194	C6KIE6	VIT_03s0091g00130	Extra-large guanine nucleotide-binding protein 2	27716	1.47279e+06	2.16547e+06	2.06604e+06	1.28218e+06	1.09466e+06	1.02223e+06	1.90144e+06	1.13303e+06	1.67819	0.746908	up	0.000107317	0.000324214	high
Jr01_16450_p1	109013250	Q9SIE1	VIT_07s0031g00980	Bifunctional aspartate aminotransferase and glutamate/aspartate-prephenate aminotransferase (AtAAT; AtPPA-AT)	51835	1.30588e+06	1.40503e+06	1.344e+06	829144	807504	780615	1.35164e+06	805754	1.67748	0.746295	up	1.98769e-08	1.074e-07	high
Jr12_22790_p1	#N/A	A7WM73	VIT_13s0019g00040	Beta-hexosaminidase 1	61422	4.08249e+06	4.93126e+06	4.77965e+06	2.75457e+06	2.74989e+06	2.72313e+06	4.5978e+06	2.74253e+06	1.67648	0.745436	up	6.04206e-09	3.42765e-08	high
Jr13_30740_p1	109010832	Q9LTE1	VIT_02s0025g00350	Heavy metal-associated isoprenylated plant protein 14 (AtHIP14)	19177	6.88074e+06	7.45011e+06	7.33436e+06	3.4927e+06	4.23589e+06	5.19628e+06	7.22174e+06	4.30829e+06	1.67624	0.74523	up	7.57892e-06	2.81943e-05	high
Jr13_11960_p1 (+2)	108980291	Q38799	VIT_01s0146g00310	Pyruvate dehydrogenase E1 component subunit beta-1, mitochondrial (PDHE1-B)	40146	1.36802e+07	1.51236e+07	1.32882e+07	8.80345e+06	7.79891e+06	8.52357e+06	1.40307e+07	8.37531e+06	1.67524	0.744368	up	1.47663e-09	8.99624e-09	high
Jr16_18080_p1	109003291	Q9M069	VIT_03s0063g02490	Glucan endo-1,3-beta-glucosidase 7	48129	3.65185e+06	3.44756e+06	3.66495e+06	2.24343e+06	2.07206e+06	2.11204e+06	3.58812e+06	2.14251e+06	1.67473	0.743928	up	5.97858e-10	3.84121e-09	high
Jr16_18720_p1	109008991	Q9SFF9	VIT_14s0060g02760	Germin-like protein subfamily 1 member 7	24806	381889	433084	297478	159876	256281	249354	370817	221837	1.67157	0.741207	up	0.00347294	0.00762612	high
Jr09_05270_p1	108994411	Q9SR77	VIT_19s0140g00210	Heme-binding-like protein At3g10130, chloroplastic	25661	2.58744e+06	2.0442e+06	1.90968e+06	1.31873e+06	1.36797e+06	1.22838e+06	2.18044e+06	1.30502e+06	1.67081	0.740544	up	4.71828e-06	1.81041e-05	high
Jr03_23730_p1 (+2)	#N/A	P59259	VIT_08s0007g00040	Histone H4	11409	3.05781e+06	4.03297e+06	6.65084e+06	2.23969e+06	3.40905e+06	2.57786e+06	4.58054e+06	2.7422e+06	1.67039	0.740184	up	0.0143606	0.027535	med
Jr16_05200_p1 (+4)	109007542	F4J8G2	VIT_16s0098g01130	Receptor-like protein 33 (AtRLP33)	95383	155803	153009	199035	67941.2	122167	114139	169283	101416	1.66919	0.739148	up	0.00824013	0.0166215	med
Jr05_08210_p1	109017714	Q9ZW07	VIT_06s0004g05100	Pumilio homolog 1 (APUM-1; AtPUM1)	114622	255655	237553	318505	156965	165988	163646	270571	162200	1.66814	0.738236	up	0.000148299	0.000435646	high
Jr16_06480_p1	108997612	Q9M9Q6	VIT_01s0011g04900	Serine carboxypeptidase-like 50	52806	29580.2	29396.7	39005.4	12273.9	23650.3	22843.9	32660.8	19589.4	1.66727	0.737484	up	0.0202089	0.0373785	med
Jr15_11960_p1	108993147	Q8S8P6	VIT_11s0065g00480	Pentatricopeptide repeat-containing protein At2g32630	14940	1.19826e+06	847527	858135	529369	550521	661914	967975	580601	1.66719	0.737422	up	0.000192642	0.000551648	high
Jr12_09500_p1	108982699	Q56WD9	VIT_05s0051g00720	3-ketoacyl-CoA thiolase 2, peroxisomal	48730	1.53875e+07	1.60248e+07	1.25791e+07	9.55995e+06	8.26658e+06	8.59442e+06	1.46638e+07	8.80699e+06	1.66502	0.73554	up	2.78508e-07	1.28927e-06	high
Jr13_13240_p1	108982574	P25858	VIT_01s0010g02460	Glyceraldehyde-3-phosphate dehydrogenase GAPC1, cytosolic	37090	1.24216e+08	1.38307e+08	1.34222e+08	8.97972e+07	7.77868e+07	7.10277e+07	1.32248e+08	7.95372e+07	1.66272	0.733546	up	2.17653e-07	1.02337e-06	high
Jr01_12240_p1	108998597	Q9XFM6	VIT_16s0100g01280	Membrane steroid-binding protein 1 (AtMP1)	23506	5.54513e+06	5.78922e+06	5.67636e+06	3.20036e+06	3.42773e+06	3.60905e+06	5.67024e+06	3.41238e+06	1.66167	0.73263	up	2.68469e-10	1.78402e-09	high
Jr13_01170_p1	108996170	Q94JT5	VIT_03s0180g00080	Cyclase-like protein 2	30329	2.37544e+07	2.77754e+07	2.72473e+07	1.74739e+07	1.44344e+07	1.55292e+07	2.62591e+07	1.58125e+07	1.66065	0.731751	up	7.83674e-08	3.96164e-07	high
Jr13_10950_p1	108997402	P29402	VIT_00s0283g00030	Calnexin homolog 1	62135	1.45816e+06	1.64119e+06	1.67726e+06	907239	1.00479e+06	966755	1.5922e+06	959596	1.65924	0.730525	up	1.56011e-07	7.59545e-07	high
Jr13_31020_p1	108982673	Q94AI4	VIT_16s0050g00820	N6-adenosine-methyltransferase non-catalytic subunit MTB	133643	13079.3	10548.8	12257.3	3617.05	8788.88	9233.98	11961.8	7213.3	1.6583	0.729694	up	0.0543059	0.0890951	low
Jr07_18300_p1	108988989	Q38931	VIT_05s0077g01870	Peptidyl-prolyl cis-trans isomerase FKBP62 (PPIase FKBP62)	52477	3.32686e+06	3.22126e+06	3.35273e+06	1.78725e+06	2.1313e+06	2.05216e+06	3.30029e+06	1.99024e+06	1.65824	0.72965	up	2.19876e-08	1.18224e-07	high
Jr08_06790_p1	109001110	Q9FJL3	VIT_18s0001g08830	Peptidyl-prolyl cis-trans isomerase FKBP65 (PPIase FKBP65)	68212	210686	226932	262002	73645.9	165442	182830	233207	140639	1.65819	0.729611	up	0.0344258	0.0596569	low
Jr02_19490_p1	109011139	Q8L733	VIT_02s0241g00110	Putative transferase At4g12130, mitochondrial	44547	1.00334e+06	1.1269e+06	990209	657283	604952	622526	1.04015e+06	628254	1.65562	0.727373	up	3.7731e-07	1.71533e-06	high
Jr07_21320_p1	109000350	Q944L7	VIT_05s0077g02210	Shewanella-like protein phosphatase 2 (AtSLP2)	46782	43374.4	52972.9	36533.4	30394.2	28067.1	21852.3	44293.6	26771.2	1.65453	0.726415	up	0.00461302	0.00990521	high
Jr12_12490_p1	109005879	Q9M7T0	VIT_05s0020g02850	Peroxiredoxin-2F, mitochondrial	22156	4.79374e+06	5.18518e+06	4.72274e+06	2.84286e+06	2.8161e+06	3.23135e+06	4.90055e+06	2.96343e+06	1.65367	0.725674	up	6.1868e-09	3.50373e-08	high
Jr03_21880_p1	109011167	Q9LYW9	VIT_08s0040g02090	DnaJ protein P58IPK homolog (AtP58IPK)	54079	7.59895e+06	8.16388e+06	7.73275e+06	4.32934e+06	4.85479e+06	5.04261e+06	7.83186e+06	4.74225e+06	1.65151	0.723784	up	2.58649e-09	1.55284e-08	high
Jr13_01120_p1	108996379	Q9C8S6	VIT_03s0180g00030	C2 domain-containing protein At1g63220	27268	374748	300637	283133	184376	189912	206663	319506	193650	1.64991	0.72239	up	0.000160417	0.000467079	high
Jr13_28010_p1	108980115	Q8LGG8	VIT_01s0011g03690	Universal stress protein A-like protein	21811	1.98518e+06	1.53143e+06	1.50618e+06	851704	829621	1.36356e+06	1.67426e+06	1.01496e+06	1.64958	0.722101	up	0.00244511	0.00555415	high
Jr11_08200_p1	#N/A	O24616	VIT_04s0023g03690	Proteasome subunit alpha type-7-B	29930	5.8572e+06	6.74387e+06	6.20386e+06	3.72932e+06	3.86948e+06	3.80927e+06	6.26831e+06	3.80269e+06	1.64839	0.721055	up	9.96958e-10	6.22344e-09	high
Jr13_10970_p1 (+1)	108997362	P29402	VIT_00s0283g00030	Calnexin homolog 1	62766	7.67604e+06	8.86951e+06	8.04864e+06	5.11184e+06	4.68215e+06	5.12839e+06	8.19807e+06	4.97413e+06	1.64814	0.720839	up	3.71183e-09	2.16152e-08	high
Jr13_10190_p1 (+1)	108997387	Q9SII8	VIT_03s0038g03680	Ubiquitin domain-containing protein DSK2b	59453	503694	471974	571929	181373	383826	374001	515865	313067	1.64778	0.720524	up	0.0156536	0.0297373	med
Jr03_24820_p1 (+1)	109016468	Q93YV9	VIT_08s0007g01500	F-box protein SKIP8	22440	153756	188360	166059	93697.5	100002	114728	169392	102809	1.64764	0.7204	up	0.00037294	0.00101588	high
Jr16_17310_p1	109005730	Q94A40	VIT_18s0001g13430	Coatomer subunit alpha-1	136842	22603.3	22547.6	36771.9	9041.03	22672.5	18113.7	27307.6	16609.1	1.64414	0.717324	up	0.0683037	0.108517	no
Jr07_09880_p1	109019627	Q9FK25	VIT_15s0048g02480	Flavone 3'-O-methyltransferase 1 (AtOMT1)	40896	3.88018e+06	4.29329e+06	4.9495e+06	2.95147e+06	2.69411e+06	2.34514e+06	4.37432e+06	2.66357e+06	1.64228	0.715696	up	3.25277e-06	1.28705e-05	high
Jr01_27990_p1	108986652	Q9SV55	VIT_11s0016g03410	AFP homolog 2	52725	629650	653427	673122	353155	417327	421646	652066	397376	1.64093	0.714514	up	4.86434e-06	1.85996e-05	high
Jr11_01710_p1	109011052	Q9SQT8	VIT_14s0030g00650	Shikimate dehydrogenase	57809	281718	365791	343723	240078	191116	173383	330411	201526	1.63955	0.713297	up	0.000707618	0.00181927	high
Jr04_19550_p1	108981757	Q9LKA4	VIT_08s0007g06300	UBP1-associated protein 2C	36152	129677	98566.9	116705	17314.6	96015.2	97071	114983	70133.6	1.63949	0.713244	up	0.213318	0.287437	no
Jr05_02290_p1 (+1)	108989854	Q76E23	VIT_15s0021g00980	Eukaryotic translation initiation factor 4G (eIF-4G; eIF4G)	208316	127121	136129	106634	73750.4	78596.4	73611.3	123295	75319.4	1.63696	0.711018	up	0.000539638	0.00142537	high
Jr12_02620_p1	108998278	Q8VYN6	VIT_00s0199g00220	ATP-dependent 6-phosphofructokinase 5, chloroplastic (ATP-PFK 5; Phosphofructokinase 5)	58146	867484	1.09212e+06	896695	704665	564907	476709	952099	582094	1.63565	0.70986	up	0.000332437	0.000912333	high
Jr07_10640_p1 (+2)	109004260	A0A1P8AS03	VIT_09s0054g01600	YTH domain-containing protein ECT4	70580	1.17011e+06	1.31195e+06	1.11125e+06	740574	756769	701202	1.19777e+06	732848	1.6344	0.708762	up	8.14783e-07	3.51509e-06	high
Jr06_00070_p1	109019945	Q9FT97	VIT_10s0071g01100	Alpha-galactosidase 1 (AtAGAL1)	46468	121278	108599	113131	74787.6	79804.9	55399.4	114336	69997.3	1.63343	0.707906	up	0.00180652	0.00423191	high
Jr10_23470_p1	108981941	Q9FN03	VIT_07s0031g02850	Ultraviolet-B receptor UVR8	46689	57343.1	53304	58461.9	30351.5	36786.2	36439.9	56369.6	34525.9	1.63268	0.70724	up	0.000977774	0.00242129	high
Jr04_18110_p1	108982063	Q84MD8	VIT_08s0007g05350	Riboflavin kinase	32562	51056.4	71194.7	56559.2	30035.4	36643.7	42863.7	59603.5	36514.2	1.63233	0.706934	up	0.00501353	0.010661	med
Jr03_08390_p1	109004440	Q05758	VIT_12s0028g02340	Ketol-acid reductoisomerase, chloroplastic	63817	1.05794e+06	1.20784e+06	1.25855e+06	625983	839408	695228	1.17478e+06	720206	1.63117	0.705903	up	3.33575e-05	0.000110833	high
Jr03_02750_p1	108982862	Q9ZSD4	VIT_08s0032g01150	Syntaxin-121 (AtSYP121)	36836	584427	611679	592994	288457	403473	405512	596367	365814	1.63025	0.70509	up	0.000166807	0.000484829	high
Jr11_15690_p1	108991423	Q9LZK5	VIT_07s0005g01220	DnaJ protein ERDJ3B	39136	1.91306e+06	2.25285e+06	1.91964e+06	1.31762e+06	1.1747e+06	1.24399e+06	2.02852e+06	1.24544e+06	1.62876	0.703776	up	6.38691e-07	2.78456e-06	high
Jr09_08230_p1 (+1)	109014266	Q8RWF0	VIT_02s0012g02660	26S proteasome non-ATPase regulatory subunit 13 homolog A	44361	259960	293606	349682	158518	230245	165840	301083	184868	1.62864	0.703666	up	0.00208353	0.00480568	high
Jr01_26370_p1 (+1)	109009420	O22898	VIT_11s0016g01980	Long chain acyl-CoA synthetase 1	34350	1.15998e+06	1.26766e+06	1.41453e+06	593044	801990	966313	1.28072e+06	787116	1.62711	0.702312	up	0.000776371	0.00197753	high
Jr03_17880_p1 (+1)	109022069	Q9SA78	VIT_10s0003g05630	Coatomer subunit epsilon-1	32278	1.73603e+06	1.76219e+06	1.71112e+06	1.16214e+06	1.03682e+06	1.00581e+06	1.73645e+06	1.06825e+06	1.6255	0.700884	up	1.99733e-07	9.49955e-07	high
Jr07_11280_p1	108982505	Q8VZF1	VIT_05s0077g01270	Acetate/butyrate--CoA ligase AAE7, peroxisomal	60220	597363	708475	709280	414259	475212	350446	671706	413306	1.6252	0.70062	up	0.000101655	0.000308806	high
Jr02_01210_p1	#N/A	Q9C9C0	VIT_17s0000g01740	Serine protease SPPA, chloroplastic	53787	17073.6	12431.8	20269.3	9842.66	9653.36	11135.7	16591.6	10210.6	1.62494	0.700381	up	0.00806101	0.0162901	med
Jr09_14180_p1	108980940	Q9T076	VIT_12s0028g03450	Early nodulin-like protein 2	40454	2.09558e+06	2.78214e+06	2.59431e+06	1.53995e+06	1.50895e+06	1.5569e+06	2.49068e+06	1.53527e+06	1.62231	0.698048	up	3.81505e-06	1.48986e-05	high
Jr05_13940_p1	109007339	Q93WI0	VIT_06s0009g03170	Rhodanese-like/PpiC domain-containing protein 12, chloroplastic	35884	46412.1	42581.1	41394	11714.2	35960.3	32704.9	43462.4	26793.1	1.62215	0.697901	up	0.0904608	0.137654	no
Jr13_08700_p1	108993392	Q9SZP8	VIT_03s0038g01950	Eukaryotic translation initiation factor 4B3 (AtTif4B3; eIF4B3)	41166	266133	318984	338788	191099	204406	174177	307969	189894	1.62179	0.697586	up	0.000207679	0.000590096	high
Jr01_16780_p1	109013228	Q9XEE2	VIT_18s0001g05530	Annexin D2	36457	2.71935e+07	3.63796e+07	4.35881e+07	2.42218e+07	2.4797e+07	1.70904e+07	3.57204e+07	2.20364e+07	1.62097	0.69686	up	0.00177919	0.00417381	high
Jr09_10200_p1 (+1)	108997435	Q9FFR3	VIT_02s0025g00900	6-phosphogluconate dehydrogenase, decarboxylating 2, chloroplastic	54434	630846	798780	579462	494018	395946	350965	669696	413643	1.61902	0.69512	up	0.00076798	0.00195918	high
Jr02_20950_p1_family	#N/A	Q94A97	VIT_12s0028g02220	Ubiquitin-conjugating enzyme E2 35	17220	8.44396e+06	8.04052e+06	8.80728e+06	4.8161e+06	4.5216e+06	6.2973e+06	8.43059e+06	5.21167e+06	1.61764	0.693888	up	1.09099e-05	3.9472e-05	high
Jr01_30480_p1	108995652	Q949Y3	VIT_11s0118g00240	Peroxidase	55696	371184	361300	488321	193485	339330	223012	406935	251942	1.61519	0.691706	up	0.00842498	0.0169528	med
Jr01_32610_p1 (+1)	108995990	Q9SFC6	VIT_07s0005g03900	Rho GDP-dissociation inhibitor 1 (AtRhoGDI1; Rho GDI-1)	33751	451361	528609	518852	261734	338010	328762	499607	309502	1.61423	0.690845	up	0.000123076	0.000368821	high
Jr07_32630_p1 (+1)	#N/A	Q6DYE4	VIT_15s0048g01100	Uncharacterized protein At1g26090, chloroplastic	40203	1.26162e+06	1.43801e+06	1.42938e+06	874261	910129	781085	1.37634e+06	855158	1.60945	0.68657	up	2.37709e-06	9.58983e-06	high
Jr10_01250_p1	108998866	Q9LQ55	VIT_18s0089g00350	Dynamin-2B	100880	1.25706e+06	1.47819e+06	1.20412e+06	970270	747616	729798	1.31312e+06	815895	1.60943	0.686546	up	0.000100888	0.000306759	high
Jr07_27650_p1 (+1)	109001990	O80934	VIT_09s0002g01450	Uncharacterized protein At2g37660, chloroplastic	33604	166236	145631	144596	72095.7	96640.8	115049	152154	94595.1	1.60848	0.685698	up	0.00399476	0.00866233	high
Jr04_01060_p1	109018928	Q9LZX1	VIT_08s0058g00870	Protein LURP-one-related 15	23390	356761	351550	402748	219158	243845	228191	370353	230398	1.60745	0.684774	up	4.80404e-05	0.000155694	high
Jr01_07220_p1 (+1)	108988028	Q96300	VIT_14s0006g03230	14-3-3-like protein GF14 nu	29732	2.60862e+07	3.4604e+07	3.34926e+07	2.2388e+07	1.88019e+07	1.74444e+07	3.13942e+07	1.95448e+07	1.60627	0.683717	up	3.83605e-05	0.000126048	high
Jr11_30340_p1	109005219	Q9SZ53	VIT_04s0008g06720	Probable protein phosphatase 2C 60 (AtPP2C60)	39645	869674	995728	804804	565590	564563	533551	890069	554568	1.60498	0.682552	up	7.76651e-06	2.88271e-05	high
Jr04_17890_p1	108984806	P33207	VIT_08s0040g01190	3-oxoacyl-[acyl-carrier-protein] reductase, chloroplastic	30887	1.43029e+06	1.60848e+06	1.47477e+06	949180	944763	919089	1.50451e+06	937677	1.60451	0.682133	up	3.36229e-07	1.54132e-06	high
Jr12_13360_p1	109005824	Q84JN1	VIT_05s0094g00490	5'-adenylylsulfate reductase-like 7	22286	3.30631e+06	3.8085e+06	4.27078e+06	2.23891e+06	2.287e+06	2.58201e+06	3.79519e+06	2.36931e+06	1.60182	0.679708	up	4.05571e-06	1.57823e-05	high
Jr10_21160_p1_family	109004656	Q56YU0	VIT_17s0000g08070	Aldehyde dehydrogenase family 2 member C4	54805	1.16869e+06	1.30902e+06	1.15141e+06	765137	774146	726612	1.2097e+06	755298	1.60163	0.679536	up	1.1493e-06	4.88785e-06	high
Jr08_22950_p1	109001978	F4JMJ1	VIT_04s0008g04410	Heat shock 70 kDa protein 17	99721	1.82396e+07	1.92429e+07	1.86198e+07	1.29597e+07	1.19045e+07	1.01804e+07	1.87007e+07	1.16815e+07	1.60088	0.678865	up	4.17533e-07	1.86933e-06	high
Jr06_00280_p1 (+2)	108993276	F4HRT5	VIT_01s0011g02810	Protein CROWDED NUCLEI 1	138877	290317	232104	335481	134021	200240	202351	285967	178870	1.59874	0.676934	up	0.00595686	0.0124501	med
Jr06_11880_p1 (+1)	108979353	Q8VZJ2	VIT_05s0077g01150	Probable glucan endo-1,3-beta-glucosidase At4g16260	40503	300914	201566	278890	185352	177896	125574	260457	162941	1.59848	0.676697	up	0.00650685	0.0135054	med
Jr09_13470_p1	109005809	Q9ZVA2	VIT_19s0014g01360	EP1-like glycoprotein 2	51961	2.65331e+06	3.08729e+06	2.79821e+06	1.61316e+06	1.87452e+06	1.85513e+06	2.84627e+06	1.78094e+06	1.59818	0.676433	up	9.12946e-07	3.93342e-06	high
Jr04_10040_p1	109019994	Q9C7N4	VIT_10s0003g02120	GDSL esterase/lipase At1g29670	39084	1.5312e+06	1.23074e+06	1.04065e+06	721396	761482	896479	1.26753e+06	793119	1.59816	0.676411	up	0.000395913	0.00107137	high
Jr02_13330_p1	108982620	Q9LFD5	VIT_02s0012g01860	Binding partner of ACD11 1	34550	5.88643e+06	6.33982e+06	5.80065e+06	3.65065e+06	3.90798e+06	3.73677e+06	6.00897e+06	3.76513e+06	1.59595	0.674416	up	4.32147e-09	2.49449e-08	high
Jr02_20040_p1 (+1)	109011581	Q8VYK7	VIT_02s0154g00390	Autophagy-related protein 8f	15233	231821	265831	270529	161809	172755	147280	256060	160615	1.59425	0.672879	up	0.000249833	0.000700213	high
Jr01_04780_p1	109007253	Q8LPJ5	VIT_14s0066g00950	Isocitrate dehydrogenase [NADP], chloroplastic/mitochondrial	52671	4.19778e+06	4.80459e+06	4.30523e+06	2.96783e+06	2.8214e+06	2.57294e+06	4.43587e+06	2.78739e+06	1.59141	0.670302	up	1.9138e-07	9.12865e-07	high
Jr13_09910_p1	108982735	Q8LFC0	VIT_04s0210g00180	Isocitrate dehydrogenase [NAD] regulatory subunit 1, mitochondrial	39723	4.49504e+06	4.19214e+06	5.616e+06	2.43922e+06	3.29672e+06	3.25975e+06	4.76773e+06	2.99856e+06	1.59	0.66903	up	0.00019538	0.000559004	high
Jr12_18720_p1 (+2)	109011207	O64740	VIT_14s0066g02380	Protein transport protein SEC13 homolog B	32698	1.00585e+06	802356	1.09529e+06	367951	831514	629452	967833	609639	1.58755	0.666803	up	0.0262748	0.0470321	med
Jr03_19000_p1	108990600	Q94BV7	VIT_12s0057g00250	External alternative NAD(P)H-ubiquinone oxidoreductase B2, mitochondrial	65629	572913	652760	559154	285128	454697	384445	594942	374757	1.58754	0.666794	up	0.00156963	0.00372999	high
Jr04_04470_p1	109013742	Q945K7	VIT_08s0040g01700	Isocitrate dehydrogenase [NAD] catalytic subunit 5, mitochondrial	41157	1.00809e+07	1.18905e+07	1.07795e+07	7.18196e+06	6.89017e+06	6.57958e+06	1.09169e+07	6.8839e+06	1.58586	0.665268	up	6.69536e-08	3.42138e-07	high
Jr14_07080_p1	108989168	Q9C585	VIT_00s0227g00160	Ubiquitin carboxyl-terminal hydrolase 8	18580	253034	224466	267852	148275	154358	167510	248451	156714	1.58537	0.664821	up	0.000277139	0.000770195	high
Jr09_09530_p1	108993755	Q9FJD4	VIT_16s0098g01630	Importin subunit beta-1	96546	67953.3	79362.7	61373	37267.7	50912.6	43486.3	69563	43888.9	1.58498	0.664463	up	0.00457371	0.00982722	high
Jr01_34340_p1 (+1)	109011858	Q8S4Y1	VIT_12s0057g01200	Acetyl-CoA acetyltransferase, cytosolic 1	41346	9.22283e+07	9.94235e+07	1.00851e+08	6.24584e+07	5.91073e+07	6.29848e+07	9.75009e+07	6.15168e+07	1.58495	0.664434	up	3.25213e-08	1.71097e-07	high
Jr12_09880_p1	108994825	Q9M5K3	VIT_05s0020g00380	Dihydrolipoyl dehydrogenase 1, mitochondrial (AtmLPD1; mtLPD1)	58408	3.56173e+07	3.67046e+07	3.44062e+07	2.20282e+07	2.26527e+07	2.26868e+07	3.55761e+07	2.24559e+07	1.58426	0.663812	up	5.00202e-09	2.87128e-08	high
Jr02_20010_p1	109011563	O82399	VIT_02s0154g00350	Malate dehydrogenase 1, peroxisomal	37785	249600	223098	273731	149220	158346	163792	248809	157119	1.58357	0.663181	up	0.000303213	0.000838414	high
Jr05_02010_p1	108989622	Q9FNX5	VIT_15s0021g00480	Dynamin-related protein 1E	68630	1.51263e+06	1.73871e+06	1.49344e+06	942541	1.04366e+06	1.01322e+06	1.58159e+06	999806	1.5819	0.661656	up	2.86119e-06	1.14171e-05	high
Jr16_09320_p1	108991509	Q9LIN5	VIT_01s0137g00690	Eukaryotic translation initiation factor 4B1 (AtTif4B1; eIF4B1)	58893	2.33769e+06	2.56848e+06	2.34289e+06	1.61572e+06	1.53075e+06	1.43737e+06	2.41636e+06	1.52795e+06	1.58144	0.661238	up	3.77007e-07	1.71533e-06	high
Jr14_04840_p1_family	108985489	F4JCU3	VIT_13s0106g00790	Diphosphomevalonate decarboxylase MVD2, peroxisomal	46654	4.27165e+07	4.45697e+07	3.95994e+07	2.75485e+07	2.64808e+07	2.62402e+07	4.22952e+07	2.67565e+07	1.58074	0.660603	up	2.71329e-08	1.4401e-07	high
Jr08_15940_p1	108998207	Q9ZQX4	VIT_05s0062g00210	V-type proton ATPase subunit F (V-ATPase subunit F)	14407	677679	529506	626670	399391	348208	412839	611285	386812	1.58031	0.660211	up	0.00012391	0.000370941	high
Jr16_14000_p1	109014566	P82874	VIT_14s0068g02030	Mitochondrial import receptor subunit TOM20-3	22556	719371	585460	613386	299042	380361	534647	639406	404683	1.58001	0.659938	up	0.00599986	0.0125241	med
Jr08_15360_p1 (+1)	108992651	O04983	VIT_14s0081g00240	Biotin carboxylase, chloroplastic	55405	200822	168077	202813	88673.9	140610	132604	190571	120629	1.5798	0.659744	up	0.00632359	0.0131499	med
Jr12_03310_p1	108983212	Q9SZY8	VIT_15s0048g02100	Probable indole-3-pyruvate monooxygenase YUCCA1	21984	120669	113296	140554	45988.9	101362	89951.8	124840	79101	1.57823	0.658309	up	0.0405382	0.0688377	low
Jr07_03410_p1	108995303	F4JQH3	VIT_04s0023g01300	Aminopeptidase P1 (AtAPP1)	73450	2.30369e+06	2.81578e+06	2.36165e+06	1.73675e+06	1.55199e+06	1.45513e+06	2.4937e+06	1.58129e+06	1.577	0.657186	up	1.06001e-05	3.8563e-05	high
Jr07_23190_p1	109007182	Q9ZW24	VIT_05s0049g01100	Glutathione S-transferase U7 (AtGSTU7)	26033	1.81346e+07	2.09785e+07	2.09001e+07	1.31701e+07	1.29874e+07	1.19107e+07	2.00044e+07	1.26894e+07	1.57646	0.656692	up	1.64606e-07	7.94351e-07	high
Jr08_02080_p1	109001782	Q9LYE5	VIT_11s0016g04410	Polyadenylate-binding protein-interacting protein 5 (PABP-interacting protein 5; Poly(A)-binding protein-interacting protein 5)	21406	405423	327624	445733	197272	281934	268629	392927	249278	1.57626	0.656502	up	0.00266547	0.00599276	high
Jr01_09680_p1 (+1)	108988200	Q9SJ85	VIT_14s0083g01010	BTB/POZ domain-containing protein At2g04740	24689	1.20157e+06	1.32477e+06	1.6077e+06	917092	829033	876878	1.37802e+06	874334	1.57608	0.656336	up	4.92361e-05	0.000158944	high
Jr13_28610_p1	109007785	Q9ZU52	VIT_01s0011g04350	Fructose-bisphosphate aldolase 3, chloroplastic (AtFBA3)	42449	4.18526e+07	4.68695e+07	4.39422e+07	2.83187e+07	2.74175e+07	2.86876e+07	4.42214e+07	2.81413e+07	1.57141	0.652057	up	3.48124e-08	1.8271e-07	high
Jr08_14280_p1	108997767	Q39173	VIT_00s0220g00130	NADP-dependent alkenal double bond reductase P2	38198	1.65983e+07	1.87837e+07	2.15422e+07	1.31296e+07	1.3046e+07	1.0073e+07	1.89748e+07	1.20829e+07	1.57039	0.651119	up	7.53439e-05	0.000233616	high
Jr13_11420_p1	108997399	Q9LYU3	VIT_17s0000g00200	Ethylene-responsive transcription factor ERF113	24953	58051.8	80725.1	63554.4	14622.1	54208.4	60068.2	67443.8	42966.2	1.56969	0.65048	up	0.186065	0.255956	no
Jr07_04760_p1	108991257	P48348	VIT_18s0001g07240	14-3-3-like protein GF14 kappa	28121	3.01055e+07	3.49917e+07	3.29843e+07	2.24269e+07	2.24852e+07	1.76377e+07	3.26938e+07	2.085e+07	1.56805	0.648975	up	1.12728e-05	4.0651e-05	high
Jr12_15350_p1_family	109005091	Q9LV77	VIT_05s0020g04160	Asparagine synthetase [glutamine-hydrolyzing] 2	26986	1.60737e+07	1.88806e+07	1.71266e+07	1.03089e+07	1.15174e+07	1.1404e+07	1.73603e+07	1.10767e+07	1.56727	0.648257	up	2.73309e-07	1.26699e-06	high
Jr01_24420_p1 (+1)	109004352	Q9LE59	VIT_11s0016g00490	Polygalacturonate 4-alpha-galacturonosyltransferase	178560	33211.8	32836	47055.1	23239.7	23573.2	25359.3	37701	24057.4	1.56713	0.648117	up	0.00774888	0.0157075	med
Jr07_08990_p1 (+1)	108986608	P92964	VIT_15s0046g00060	Serine/arginine-rich splicing factor RS31 (At-RSp31; AtRS31)	32714	78330.8	80862.2	103864	30283.8	66419.5	71179.7	87685.8	55961	1.56691	0.647921	up	0.0653719	0.104748	no
Jr01_28670_p1	108992693	Q9LV58	VIT_11s0016g04080	Multiprotein-bridging factor 1c	18563	123060	133078	129836	91782.7	71969.5	82645.6	128658	82132.6	1.56646	0.647511	up	0.0014526	0.00348709	high
Jr04_21240_p1	108990515	Q1PF50	VIT_08s0007g02800	Probable serine protease EDA2	56972	420519	367709	662730	105729	452560	370241	483653	309510	1.56264	0.643985	up	0.200365	0.272444	no
Jr10_08540_p1	108991058	P92965	VIT_16s0100g00450	Serine/arginine-rich splicing factor RS40 (At-RSp40; AtRS40)	43194	573004	701120	491370	547861	330706	252515	588498	377027	1.56089	0.642369	up	0.0357845	0.0615583	low
Jr04_01570_p1	108995162	Q96329	VIT_08s0105g00460	Acyl-coenzyme A oxidase 4, peroxisomal (AOX 4)	47550	762942	855058	857148	560011	548994	483216	825049	530740	1.55453	0.636474	up	2.40892e-05	8.24485e-05	high
Jr12_06660_p1 (+1)	109021080	Q8LCW9	VIT_02s0025g02780	60S acidic ribosomal protein P1-1	11278	288980	337575	361581	190273	233259	212171	329379	211901	1.5544	0.636357	up	0.000675775	0.00174284	high
Jr07_33490_p1	108981100	P05466	VIT_15s0048g00350	3-phosphoshikimate 1-carboxyvinyltransferase, chloroplastic	55761	2.13425e+07	2.26848e+07	2.3003e+07	1.3148e+07	1.51753e+07	1.48553e+07	2.23434e+07	1.43929e+07	1.55239	0.634493	up	2.0547e-07	9.75836e-07	high
Jr02_05700_p1	108995470	O48520	VIT_17s0000g06180	DNA polymerase delta small subunit	41707	5.72018e+06	6.02105e+06	6.21385e+06	4.28719e+06	3.67603e+06	3.60576e+06	5.98503e+06	3.85633e+06	1.552	0.634131	up	5.33111e-07	2.34911e-06	high
Jr14_05440_p1	#N/A	P04778	VIT_19s0014g00160	Chlorophyll a-b binding protein 1, chloroplastic	28358	2.26961e+06	1.22071e+06	1.77218e+06	1.29097e+06	796081	1.30897e+06	1.75417e+06	1.13201e+06	1.5496	0.6319	up	0.0263837	0.0471587	med
Jr07_38680_p1	108991905	O81235	VIT_13s0067g02990	Superoxide dismutase [Mn] 1, mitochondrial	24934	7.48771e+07	6.43142e+07	7.81562e+07	4.08176e+07	3.88405e+07	6.06137e+07	7.24492e+07	4.67573e+07	1.54947	0.631779	up	0.00174339	0.00411031	high
Jr10_21280_p1	109004654	Q56YU0	VIT_17s0000g08070	Aldehyde dehydrogenase family 2 member C4	54439	4.67003e+06	4.86558e+06	4.30867e+06	3.13425e+06	2.80576e+06	3.00054e+06	4.61476e+06	2.98019e+06	1.54848	0.630854	up	2.68522e-07	1.2483e-06	high
Jr14_08440_p1	108996997	Q9SV73	VIT_06s0004g07110	Gamma-interferon-responsive lysosomal thiol protein (AtGILT)	29782	772442	849088	821349	573446	536351	468171	814293	525989	1.54812	0.630515	up	4.02492e-05	0.00013187	high
Jr01_24390_p1_family	#N/A	Q9LXL5	VIT_11s0016g00470	Sucrose synthase 4 (AtSUS4)	92349	5.07064e+06	6.1834e+06	7.43178e+06	4.48488e+06	4.82953e+06	2.77655e+06	6.22861e+06	4.03032e+06	1.54544	0.628015	up	0.00924899	0.0183532	med
Jr01_06150_p1 (+2)	108984043	Q9FKS5	VIT_14s0171g00330	Cytochrome c1 2, heme protein, mitochondrial	33902	6.08388e+06	7.01631e+06	6.25675e+06	4.28397e+06	4.51335e+06	3.72975e+06	6.45231e+06	4.17569e+06	1.54521	0.627802	up	2.4383e-06	9.81275e-06	high
Jr16_08120_p1	108997239	P57742	VIT_10s0042g00150	Probable prefoldin subunit 5	19640	2.17189e+06	1.63569e+06	1.85865e+06	881116	1.26169e+06	1.52505e+06	1.88874e+06	1.22262e+06	1.54484	0.627454	up	0.00591453	0.0123771	med
Jr05_07950_p1	109020643	Q9LNW1	VIT_06s0004g05550	Ras-related protein RABA2b (AtRABA2b)	23936	148741	163475	165013	102915	109317	96817.8	159076	103017	1.54418	0.626839	up	0.000891117	0.00222959	high
Jr11_05200_p1	109011326	Q1PF50	VIT_00s0558g00030	Probable serine protease EDA2	58357	914553	1.07639e+06	1.03083e+06	580454	765705	612151	1.00726e+06	652770	1.54305	0.625784	up	0.000231476	0.000652647	high
Jr08_06200_p1	109007402	Q9S9Z8	VIT_18s0001g05720	14-3-3-like protein GF14 omicron	28854	9.83814e+06	1.13588e+07	1.04906e+07	7.89818e+06	6.54791e+06	6.09001e+06	1.05625e+07	6.84537e+06	1.54302	0.625755	up	1.49522e-05	5.27648e-05	high
Jr10_24400_p1 (+1)	108987808	Q681Q7	VIT_07s0005g03660	Uncharacterized protein At1g03900	30675	1.95869e+06	1.90056e+06	1.87104e+06	1.14732e+06	1.27734e+06	1.29054e+06	1.9101e+06	1.2384e+06	1.54239	0.62517	up	1.81109e-06	7.47103e-06	high
Jr07_08050_p1	108996445	O04616	VIT_16s0050g02240	Protein CURVATURE THYLAKOID 1A, chloroplastic	17932	1.18785e+06	611953	683964	412499	547414	652664	827924	537525	1.54025	0.623165	up	0.0370794	0.0634217	low
Jr03_23130_p1 (+6)	#N/A	P28186	VIT_06s0004g04200	Ras-related protein RABE1c (AtRABE1c)	23872	504365	464967	409581	256783	281554	357322	459637	298553	1.53955	0.62251	up	0.00150893	0.00360132	high
Jr03_08970_p1	109002522	O64764	VIT_01s0011g01370	Thioredoxin O1, mitochondrial (AtTrxo1)	22122	1.12229e+06	714926	825709	421339	497789	813025	887642	577384	1.53735	0.620446	up	0.0338386	0.0587629	low
Jr03_23940_p1	108979943	Q9LUF2	VIT_08s0007g00710	11-beta-hydroxysteroid dehydrogenase-like 4B	14665	656517	434333	390955	244333	306494	414342	493935	321723	1.53528	0.618502	up	0.0278828	0.0495426	med
Jr16_17000_p1	109006539	Q945M1	VIT_03s0038g00720	NADH dehydrogenase [ubiquinone] 1 beta subcomplex subunit 9	16455	2.33337e+06	1.77355e+06	2.35454e+06	858267	1.67312e+06	1.67843e+06	2.15382e+06	1.40327e+06	1.53486	0.618105	up	0.0258751	0.0464763	med
Jr16_14400_p1	108985469	Q9ASS6	VIT_01s0146g00110	Photosynthetic NDH subunit of lumenal location 5, chloroplastic	34673	2.64873e+06	2.84592e+06	2.56745e+06	1.99173e+06	1.50655e+06	1.75824e+06	2.68736e+06	1.75217e+06	1.53373	0.617048	up	4.22244e-05	0.000137794	high
Jr10_03520_p1	109021651	P0DKG4	VIT_14s0066g00800	MATH domain and coiled-coil domain-containing protein At2g42465	62518	2.89123e+06	2.66449e+06	2.76466e+06	1.57293e+06	1.90356e+06	1.95328e+06	2.77346e+06	1.80992e+06	1.53236	0.61576	up	1.30816e-05	4.67139e-05	high
Jr13_26280_p1	108988315	Q9LIN2	VIT_14s0128g00520	GDSL esterase/lipase At3g26430	42671	1.61922e+06	2.07447e+06	1.44822e+06	1.62112e+06	916588	818480	1.71397e+06	1.11873e+06	1.53206	0.615477	up	0.0326586	0.0569841	low
Jr13_14160_p1	109014390	Q9FDW8	VIT_01s0011g00210	Cytochrome b5 isoform A (AtCb5-A)	14819	365313	354263	383092	239761	244695	237662	367556	240706	1.52699	0.610692	up	0.000137539	0.000408772	high
Jr14_10340_p1	108998462	Q9LHT0	VIT_06s0004g05430	Tropinone reductase homolog At5g06060	31427	503965	542199	493464	330620	338005	340613	513209	336413	1.52553	0.609314	up	5.52243e-05	0.000176204	high
Jr03_04750_p1	109019451	O81644	VIT_08s0007g08690	Villin-2	107123	2.42048e+06	1.82404e+06	2.60929e+06	1.19069e+06	1.83102e+06	1.4736e+06	2.2846e+06	1.49844e+06	1.52466	0.608486	up	0.00442418	0.00954951	high
Jr01_03740_p1	108992887	O22287	VIT_14s0066g02400	Mannose-1-phosphate guanylyltransferase 1	45827	20814.8	22313.1	22120.1	15038.5	15654.4	12109.8	21749.3	14267.6	1.52439	0.608225	up	0.00726056	0.0148638	med
Jr07_01320_p1 (+1)	109013888	Q9FLW0	VIT_07s0129g00960	Probable receptor-like protein kinase At5g24010	97314	439228	609882	500994	328824	342460	346604	516701	339296	1.52286	0.606786	up	0.000755083	0.00193226	high
Jr01_24850_p1	108986551	Q9LQI9	VIT_11s0016g00700	Oligouridylate-binding protein 1B (AtUBP1b)	44993	852899	812292	742129	596051	474950	509955	802440	526985	1.5227	0.606631	up	0.000157547	0.000459534	high
Jr13_16760_p1 (+1)	#N/A	Q07098	VIT_01s0026g01080	Serine/threonine-protein phosphatase PP2A-2 catalytic subunit	35035	354386	382087	366886	205434	286066	234550	367786	242017	1.51967	0.603762	up	0.00151682	0.00361492	high
Jr10_12880_p1	108991738	Q93VG8	VIT_07s0005g06420	DeSI-like protein At4g17486	29970	1.25578e+06	1.73139e+06	1.38831e+06	1.03849e+06	896864	944669	1.4585e+06	960009	1.51925	0.603362	up	0.00038974	0.00105727	high
Jr04_18460_p1	109008390	Q93V66	VIT_00s0252g00030	Protein FATTY ACID EXPORT 1, chloroplastic (At-FAX1)	24256	86741.1	87190.8	74073.3	56874.4	56290.9	50100.4	82668.4	54421.9	1.51903	0.603147	up	0.00369569	0.00806688	high
Jr11_19430_p1 (+1)	108981433	F4KHI3	VIT_18s0001g01080	Protein VARIATION IN COMPOUND TRIGGERED ROOT groInfh response	29447	4.69305e+06	5.33884e+06	5.34863e+06	3.85406e+06	3.5784e+06	2.70153e+06	5.12684e+06	3.378e+06	1.51771	0.6019	up	0.000263603	0.000734905	high
Jr08_05800_p1	108981408	Q38946	VIT_16s0039g02750	Glutamate dehydrogenase 2 (GDH 2)	44819	4.0969e+06	4.65324e+06	4.63881e+06	2.74414e+06	3.2168e+06	2.86664e+06	4.46298e+06	2.94253e+06	1.51672	0.600953	up	4.2755e-06	1.65789e-05	high
Jr02_21640_p1 (+1)	109012887	Q9SKK0	VIT_19s0014g02210	EIN3-binding F-box protein 1	57130	50494.7	77667	45481	64968.9	28994.9	20528.8	57880.9	38164.2	1.51663	0.600865	up	0.188206	0.258362	no
Jr01_04760_p1	109007255	Q9FNE2	VIT_14s0066g00960	Glutaredoxin-C2 (AtGrxC2)	11283	4.97728e+07	2.76766e+07	2.73446e+07	1.99998e+07	1.83958e+07	3.07184e+07	3.49314e+07	2.3038e+07	1.51625	0.600508	up	0.0451797	0.0757053	low
Jr07_22850_p1	108991206	Q9LW57	VIT_05s0049g01360	Plastid-lipid-associated protein 6, chloroplastic	30559	1.90129e+07	2.09941e+07	1.738e+07	1.25934e+07	1.32796e+07	1.19808e+07	1.9129e+07	1.26179e+07	1.51602	0.600286	up	2.80602e-06	1.12105e-05	high
Jr13_23180_p1	108994097	Q9ZVF6	VIT_01s0011g05010	Phytanoyl-CoA dioxygenase	32014	888818	1.04188e+06	1.06235e+06	636499	702325	637164	997682	658663	1.51471	0.59904	up	6.88749e-05	0.000215224	high
Jr10_05120_p1	108987083	Q84L31	VIT_14s0006g03040	Ubiquitin receptor RAD23c (AtRAD23c)	45781	2.73509e+06	3.00509e+06	3.00033e+06	2.07619e+06	1.82595e+06	1.86974e+06	2.9135e+06	1.92396e+06	1.51433	0.598676	up	3.65679e-06	1.43145e-05	high
Jr07_03400_p1	108995304	Q9ZU72	VIT_16s0115g00360	UDP-glycosyltransferase 72D1	52741	763733	797517	863912	487961	554806	560300	808387	534355	1.51283	0.597247	up	6.57094e-05	0.000206659	high
Jr10_02490_p1 (+1)	109002587	Q9FM19	VIT_17s0000g05680	Hypersensitive-induced response protein 1 (AtHIR1)	31790	1.2753e+06	1.47805e+06	1.45157e+06	781994	1.10531e+06	896449	1.40164e+06	927919	1.51052	0.595045	up	0.000668993	0.0017267	high
Jr08_08750_p1	109003886	Q9STX5	VIT_18s0001g14500	Endoplasmin homolog	94210	1.81272e+08	1.96316e+08	2.11389e+08	1.38578e+08	1.4274e+08	1.08852e+08	1.96326e+08	1.30057e+08	1.50954	0.594107	up	0.000127063	0.000379692	high
Jr06_20740_p1	108982340	Q949R4	VIT_08s0007g08410	Extradiol ring-cleavage dioxygenase (AtLigB)	29750	1.1947e+06	1.37389e+06	1.42479e+06	824255	900386	922673	1.33112e+06	882438	1.50846	0.593078	up	4.85079e-05	0.000156901	high
Jr10_24520_p1	109010726	Q8W034	VIT_07s0005g03980	Heterogeneous nuclear ribonucleoprotein 1 (hnRNP1)	48815	745129	661466	751948	444907	489872	497134	719514	477304	1.50745	0.592114	up	8.34823e-05	0.000256917	high
Jr08_16350_p1 (+1)	108980232	O82462	VIT_14s0060g00110	Glutamate--tRNA ligase, cytoplasmic	81434	78344.3	99863.3	94802.3	63928.9	63918.8	53501.7	91003.3	60449.8	1.50544	0.59018	up	0.00675868	0.0139176	med
Jr01_27690_p1 (+2)	108987245	Q9SP35	VIT_11s0016g03110	Mitochondrial import inner membrane translocase subunit TIM17-2	26359	196083	240318	239589	136908	161757	150386	225330	149684	1.50538	0.590123	up	0.00227381	0.0052045	high
Jr01_17920_p1	109006047	Q56WD9	VIT_05s0051g00720	3-ketoacyl-CoA thiolase 2, peroxisomal	35193	6.44953e+06	5.98363e+06	5.31705e+06	4.25268e+06	3.81592e+06	3.72427e+06	5.91674e+06	3.93095e+06	1.50517	0.589922	up	7.60918e-06	2.82749e-05	high
Jr07_24000_p2 (+1)	#N/A	Q9FY64	VIT_07s0141g00710	40S ribosomal protein S15-4	17249	1.4859e+06	2.65526e+06	4.39896e+06	1.99779e+06	2.03418e+06	1.64792e+06	2.84671e+06	1.89329e+06	1.50357	0.588395	up	0.0986206	0.148223	no
Jr08_11470_p1	109007319	P25070	VIT_07s0005g01470	Calcium-binding protein CML24	36353	48331.9	47447	41994.9	33650.8	30717.3	27267.3	45924.6	30545.1	1.5035	0.588325	up	0.00706697	0.0144946	med
Jr04_15870_p1	108998405	Q96299	VIT_19s0014g01420	14-3-3-like protein GF14 mu	35005	1.09432e+07	1.1515e+07	1.0945e+07	7.69971e+06	7.41244e+06	7.11854e+06	1.11344e+07	7.41023e+06	1.50257	0.587436	up	1.88626e-07	9.01033e-07	high
Jr13_06450_p1	109010238	Q9FFF6	VIT_03s0063g01210	Probable 2-oxoglutarate-dependent dioxygenase At5g05600	42779	288797	254627	278318	179297	206446	161398	273914	182380	1.50188	0.586773	up	0.00175546	0.00413516	high
Jr11_02630_p1	109008073	Q75W54	VIT_14s0128g00710	Mannosylglycoprotein endo-beta-mannosidase 42 kDa subunit (AtEBM; Endo-beta-mannosidase)	110643	663183	709162	821884	448144	515006	499381	731410	487510	1.5003	0.585246	up	0.000273202	0.000759893	high
Jr11_03340_p1	#N/A	Q9SEI2	VIT_05s0020g01180	26S proteasome regulatory subunit 6A homolog A	47536	683907	603075	677591	513367	398744	397787	654857	436633	1.49979	0.584761	up	0.000758095	0.00193753	high
Jr03_08520_p1 (+1)	108981347	Q9LT78	VIT_10s0003g01360	Probable cysteine protease RD21C	57029	1.49053e+06	1.58136e+06	1.46512e+06	992860	989628	1.04493e+06	1.51234e+06	1.00914e+06	1.49864	0.583656	up	8.1527e-06	3.00238e-05	high
Jr14_21570_p1	109001661	Q9SVQ6	VIT_06s0004g00890	Putative pectate lyase 14	19173	5.07958e+06	6.37849e+06	6.00107e+06	4.32526e+06	3.67427e+06	3.65601e+06	5.81971e+06	3.88518e+06	1.49793	0.582966	up	5.1013e-05	0.000164198	high
Jr07_23420_p1	#N/A	Q9M174	No Vitis hit	Putative protein NRT1/ PTR FAMILY 2.2 (AtNPF2.2)	13687	708209	839030	939256	613399	538592	508177	828832	553389	1.49774	0.582785	up	0.000713583	0.00183175	high
Jr04_21940_p1_family	109005337	Q9LFA3	VIT_08s0007g03610	Monodehydroascorbate reductase 1, peroxisomal (AtMDAR1)	47406	4.23602e+07	4.87363e+07	4.77686e+07	3.19559e+07	3.32057e+07	2.75687e+07	4.62884e+07	3.09101e+07	1.49751	0.58257	up	1.76561e-05	6.16466e-05	high
Jr12_10790_p1	108994793	Q93VR4	VIT_05s0077g01680	MLP-like protein 423	18159	4.14943e+06	4.98523e+06	4.59721e+06	3.01591e+06	2.89961e+06	3.26072e+06	4.57729e+06	3.05875e+06	1.49646	0.581553	up	8.08136e-06	2.98277e-05	high
Jr04_17190_p1	109020892	Q9SKU1	VIT_00s0370g00020	Clathrin light chain 1	35730	1.28175e+07	1.30946e+07	1.22415e+07	8.20728e+06	8.5115e+06	8.79047e+06	1.27179e+07	8.50309e+06	1.49568	0.580799	up	2.60517e-07	1.21452e-06	high
Jr11_17490_p1	109007754	Q93VC9	VIT_07s0005g02820	Cathepsin B-like protease 2	45840	1.94523e+06	2.4166e+06	2.39759e+06	1.79701e+06	1.47947e+06	1.24658e+06	2.25314e+06	1.50769e+06	1.49443	0.579599	up	0.00145107	0.00348595	high
Jr16_04780_p1	109007505	Q9FLT9	VIT_16s0098g00610	Chloroplastic import inner membrane translocase subunit HP30-2	27808	895256	654280	741211	453837	388156	692948	763582	511647	1.4924	0.577634	up	0.0222198	0.0406418	med
Jr01_00880_p1	109001289	P94078	VIT_14s0068g01110	Alpha-mannosidase At3g26720	114972	7.99659e+06	9.31002e+06	9.60871e+06	5.09138e+06	6.67283e+06	6.27243e+06	8.97177e+06	6.01221e+06	1.49226	0.577497	up	0.00014123	0.00041786	high
Jr03_13370_p1 (+1)	#N/A	P92963	VIT_12s0057g01470	Ras-related protein RABB1c (AtRABB1c)	23180	95198.2	93572	105254	61132	67730.9	68177.7	98008	65680.2	1.4922	0.577439	up	0.00384346	0.00836174	high
Jr10_13460_p1 (+1)	108995852	Q9MAU6	VIT_12s0059g01560	Protein disulfide-isomerase like 2-2 (AtPDIL2-2)	50012	8.8817e+06	9.81786e+06	9.03204e+06	6.1906e+06	6.39148e+06	6.01863e+06	9.24387e+06	6.20024e+06	1.49089	0.576173	up	5.58452e-07	2.45094e-06	high
Jr09_11370_p1 (+2)	108999832	Q9M2E2	VIT_15s0046g03590	(+)-neomenthol dehydrogenase	32784	144872	148436	146204	83841.1	117428	93663.4	146504	98310.8	1.49021	0.575516	up	0.00676035	0.0139176	med
Jr03_06050_p1 (+2)	108983416	O81027	VIT_08s0040g01170	Hydroxymethylglutaryl-CoA lyase, mitochondrial (HL; HMG-CoA lyase)	47890	622648	675916	732253	413968	464044	485738	676939	454583	1.48914	0.574481	up	0.000262318	0.000732092	high
Jr04_15770_p1	109011295	P43297	VIT_10s0003g01360	Cysteine proteinase RD21A	58084	571970	596112	511618	407352	358005	362804	559900	376054	1.48888	0.574231	up	0.000305469	0.000843943	high
Jr11_21240_p1	108991373	Q94F09	VIT_18s0075g00210	Protein disulfide-isomerase 5-2 (AtPDIL5-2)	49140	1.70126e+06	1.77658e+06	1.96925e+06	1.13447e+06	1.34824e+06	1.17583e+06	1.8157e+06	1.21951e+06	1.48887	0.57422	up	7.26278e-05	0.000225753	high
Jr13_00800_p1	108988920	Q9SEU7	VIT_03s0063g00280	Thioredoxin M3, chloroplastic (AtTrxm3)	19480	1.75141e+06	1.25557e+06	1.48293e+06	956806	911833	1.14898e+06	1.49664e+06	1.00587e+06	1.4879	0.573281	up	0.00147596	0.00353543	high
Jr12_18550_p1	109007870	Q9ZU25	VIT_09s0002g03200	Probable mitochondrial-processing peptidase subunit alpha-1, mitochondrial	54511	3.51464e+07	3.73331e+07	3.67918e+07	2.59297e+07	2.39106e+07	2.36005e+07	3.64237e+07	2.44803e+07	1.48788	0.573259	up	1.02501e-06	4.39329e-06	high
Jr12_17500_p1	109011725	Q8RWN9	VIT_09s0002g01800	Dihydrolipoyllysine-residue acetyltransferase component 2 of pyruvate dehydrogenase complex, mitochondrial	60577	3.40028e+07	3.6929e+07	3.27082e+07	2.42724e+07	2.2804e+07	2.25939e+07	3.45467e+07	2.32234e+07	1.48758	0.572964	up	1.79684e-06	7.42152e-06	high
Jr03_20210_p1	109007432	Q9ZNT1	VIT_08s0056g01150	NADH--cytochrome b5 reductase 1	31012	1.6311e+06	1.65116e+06	1.98311e+06	1.19564e+06	1.20319e+06	1.14264e+06	1.75512e+06	1.18049e+06	1.48677	0.572184	up	6.82684e-05	0.000213857	high
Jr02_25040_p1	108984651	Q9SZ15	VIT_19s0090g01240	Protein HOMOLOG OF MAMMALIAN LYST-INTERACTING PROTEIN 5	48034	106684	96667.8	128364	49537.5	89787.9	84015.1	110572	74446.8	1.48525	0.570702	up	0.0463578	0.0773493	low
Jr05_00580_p1	108988401	Q94CJ5	VIT_13s0064g00160	Protein RETICULATA-RELATED 4, chloroplastic	45171	235675	253689	273865	148761	215331	149814	254409	171302	1.48515	0.57061	up	0.0094698	0.0187575	med
Jr04_22160_p1 (+1)	109005159	Q9FMY5	VIT_08s0007g03950	Splicing factor U2af small subunit B	38520	59213.8	47048.5	72066.1	17584.8	50779.4	51758.1	59442.8	40040.8	1.48456	0.570031	up	0.180874	0.249648	no
Jr16_21570_p1	109004060	Q9XJ35	VIT_03s0091g00700	ATP-dependent Clp protease proteolytic subunit-related protein 1, chloroplastic (ClpR1)	43463	759264	720124	682557	392326	546706	517622	720648	485551	1.48419	0.569672	up	0.00143994	0.00346174	high
Jr13_26050_p1	108988333	Q9LFL3	VIT_19s0014g00550	TOM1-like protein 1	44040	900259	1.00652e+06	879856	623326	624655	632416	928877	626799	1.48194	0.567485	up	6.18472e-05	0.000195257	high
Jr15_13570_p1	109001225	Q38961	VIT_07s0130g00140	DNA cross-link repair protein SNM1 (AtSNM1)	18167	705680	1.12646e+06	780583	437626	680591	644902	870908	587706	1.48188	0.567424	up	0.0239625	0.0434436	med
Jr12_04310_p1 (+1)	109003519	Q39024	VIT_15s0046g02010	Mitogen-activated protein kinase 4 (AtMPK4; MAP kinase 4)	42895	1.37054e+06	1.32725e+06	1.26968e+06	786633	976731	916147	1.32249e+06	893171	1.48067	0.56625	up	0.000131303	0.000391298	high
Jr04_03150_p1	109006774	Q9LFF9	VIT_08s0040g02470	Soluble inorganic pyrophosphatase 4	24539	1.18473e+06	1.29505e+06	1.08826e+06	774293	813925	822917	1.18935e+06	803712	1.47982	0.565418	up	7.47765e-05	0.000232075	high
Jr09_09600_p1	108993796	Q9SGW3	VIT_02s0025g02010	26S proteasome non-ATPase regulatory subunit 8 homolog A	30986	1.54819e+06	1.31775e+06	1.61105e+06	1.10689e+06	978741	949553	1.49233e+06	1.01173e+06	1.47503	0.560746	up	0.000221608	0.00062697	high
Jr11_04890_p1 (+1)	108987896	O65390	VIT_14s0060g00330	Aspartic proteinase A1	55486	3.84972e+06	3.74914e+06	3.43266e+06	2.79951e+06	2.53457e+06	2.15558e+06	3.67717e+06	2.49656e+06	1.4729	0.558658	up	0.000119412	0.000358782	high
Jr03_21850_p1	109011163	Q8H0T9	VIT_08s0040g01960	Katanin p80 WD40 repeat-containing subunit B1 homolog	58492	75341.6	84697.8	71764.8	46281.2	56790.9	54427.4	77268.1	52499.8	1.47178	0.557558	up	0.00897852	0.0178487	med
Jr13_12460_p1	109003189	Q9C7F7	VIT_11s0016g04440	Non-specific lipid transfer protein GPI-anchored 1 (AtLTPG-1; Protein LTP-GPI-ANCHORED 1)	26761	405173	372259	387782	258913	278642	255076	388405	264211	1.47006	0.555873	up	0.00054066	0.00142675	high
Jr07_06880_p1	109021532	F4JXC5	VIT_15s0046g02330	Subtilisin-like protease SBT5.4	30402	9.53627e+06	1.00336e+07	1.06109e+07	6.19944e+06	7.17726e+06	7.15521e+06	1.00603e+07	6.84397e+06	1.46994	0.555761	up	7.98165e-06	2.95353e-05	high
Jr08_01330_p1 (+1)	109002794	Q9LFP1	VIT_04s0008g05650	Vesicle-associated membrane protein 713 (AtVAMP713)	25161	25047.8	22247.2	25319	15572.5	20778.9	13069.9	24204.7	16473.8	1.46928	0.555111	up	0.030953	0.0543823	low
Jr14_16680_p1	108985851	Q9ZQG8	VIT_06s0080g00410	Ferredoxin-3, chloroplastic (AtFd3)	16742	869819	923192	1.10269e+06	695173	579621	696211	965235	657002	1.46915	0.554983	up	0.000888931	0.0022274	high
Jr01_11250_p1	108987405	Q9FHM7	VIT_16s0022g01690	Hypersensitive-induced response protein 4 (AtHIR4)	32390	325726	373094	365180	297581	230938	196251	354666	241590	1.46805	0.553901	up	0.00849185	0.0170666	med
Jr04_15310_p1 (+1)	109020968	Q93Y22	VIT_01s0011g01570	Coatomer subunit delta	55958	2.28013e+06	2.40875e+06	2.46557e+06	1.694e+06	1.7313e+06	1.4482e+06	2.38482e+06	1.6245e+06	1.46803	0.553883	up	4.99337e-05	0.000160881	high
Jr04_06730_p1	108987280	Q8VYN2	VIT_00s0203g00040	Vesicle-associated protein 4-2	30913	1.34673e+06	1.54618e+06	1.45987e+06	1.02065e+06	1.04713e+06	900106	1.45093e+06	989293	1.46663	0.552505	up	0.000120397	0.000361409	high
Jr01_09820_p1_family	108988255	O22666	VIT_14s0083g01100	UDP-arabinopyranose mutase 3	41008	99701.8	123608	107204	77683.3	66890.9	80786.9	110171	75120.4	1.46659	0.552467	up	0.00882651	0.0176103	med
Jr08_09200_p1 (+2)	109004278	Q9SII9	VIT_09s0054g01880	Ubiquitin domain-containing protein DSK2a	91856	69768.5	76382.2	82372.7	41470.4	57693.2	56824.4	76174.5	51996	1.46501	0.550907	up	0.0174342	0.0327426	med
Jr13_04040_p1	109012607	Q24JJ8	VIT_03s0017g01240	Peroxisomal (S)-2-hydroxy-acid oxidase GLO3	35547	1.36959e+07	1.46931e+07	1.68028e+07	1.08306e+07	1.02023e+07	9.8459e+06	1.50639e+07	1.02929e+07	1.46352	0.549447	up	2.42063e-05	8.271e-05	high
Jr06_13090_p1	108979066	Q8GWW7	VIT_17s0000g04660	Agmatine deiminase	42587	4.57101e+06	4.57661e+06	4.26303e+06	2.81043e+06	3.05306e+06	3.30438e+06	4.47022e+06	3.05596e+06	1.46279	0.548721	up	1.06673e-05	3.87628e-05	high
Jr11_19520_p1	109018989	Q94K80	VIT_18s0001g14900	La-related protein 1C (AtLARP1c)	59093	165485	183919	182364	110906	134935	118207	177256	121350	1.46071	0.546665	up	0.0044142	0.00953421	high
Jr09_12170_p1	108981857	Q9XJ36	VIT_02s0025g05140	ATP-dependent Clp protease proteolytic subunit-related protein 2, chloroplastic (ClpR2; nClpP2)	31588	1.5053e+06	1.14396e+06	1.41858e+06	727776	1.13743e+06	920907	1.35595e+06	928705	1.46004	0.546008	up	0.00875836	0.0175061	med
Jr08_10370_p1	109000505	Q9FZ27	VIT_14s0060g00120	Germin-like protein subfamily 2 member 2	25987	931176	722780	725756	403978	456828	770046	793237	543617	1.45918	0.545161	up	0.0446926	0.074968	low
Jr07_31070_p1	109013127	Q56XG6	VIT_09s0002g06660	DEAD-box ATP-dependent RNA helicase 15	48166	356332	474232	301551	216941	288781	270301	377372	258675	1.45887	0.544848	up	0.018173	0.0339366	med
Jr07_04510_p1	108991260	P52577	VIT_03s0038g04680	Isoflavone reductase homolog P3	33765	1.66903e+07	1.43388e+07	1.70897e+07	1.22011e+07	1.02216e+07	1.05744e+07	1.60396e+07	1.0999e+07	1.45827	0.544259	up	7.21251e-05	0.00022448	high
Jr01_05150_p1	109021652	Q9SI37	VIT_14s0066g00450	WRKY transcription factor 1	42982	5.20254e+06	4.81837e+06	5.79337e+06	3.4508e+06	3.83373e+06	3.56193e+06	5.27143e+06	3.61549e+06	1.45801	0.544004	up	2.03107e-05	7.00987e-05	high
Jr07_05990_p1	109004875	Q9M2E2	VIT_15s0046g03650	(+)-neomenthol dehydrogenase	31936	335397	378300	262397	270033	196561	203022	325364	223205	1.45769	0.543685	up	0.0160455	0.0303246	med
Jr03_24100_p1	109010018	Q7XZF5	VIT_08s0007g05580	Protein RST1	29873	1.84706e+06	2.18024e+06	2.39662e+06	1.2984e+06	1.67284e+06	1.43764e+06	2.14131e+06	1.46963e+06	1.45704	0.543043	up	0.00108931	0.00267538	high
Jr03_07530_p1	108984185	Q8VZD4	VIT_10s0003g00070	Glyoxysomal processing protease, glyoxysomal (AtDEG15)	80700	228577	303563	220579	246313	131505	138912	250906	172243	1.4567	0.542701	up	0.069125	0.109454	no
Jr13_22040_p1	109004006	Q8GYN9	VIT_01s0127g00420	1,4-dihydroxy-2-naphthoyl-CoA synthase, peroxisomal (DHNS)	37158	4.25936e+06	4.44534e+06	4.82114e+06	3.09733e+06	3.03945e+06	3.15748e+06	4.50861e+06	3.09809e+06	1.45529	0.541306	up	4.90035e-06	1.87156e-05	high
Jr09_16790_p1_family	108994885	Q42202	VIT_19s0015g01400	60S ribosomal protein L40-2	44899	2.25268e+07	2.52705e+07	2.34043e+07	1.70908e+07	1.57916e+07	1.60448e+07	2.37339e+07	1.63091e+07	1.45525	0.54127	up	5.02173e-06	1.91348e-05	high
Jr03_14450_p1	108982753	Q9SUR9	VIT_10s0003g03510	Protein SGT1 homolog A (AtSGT1a)	24657	450011	769153	432892	513671	332266	289649	550685	378529	1.4548	0.540824	up	0.0836522	0.12927	no
Jr07_30330_p1	108984885	Q9LW85	VIT_09s0002g04750	MAR-binding filament-like protein 1	81781	154319	248151	322591	64260.7	228305	206318	241687	166295	1.45337	0.539399	up	0.266537	0.346961	no
Jr11_09430_p1	108995225	Q9M4B5	VIT_14s0081g00080	Probable prefoldin subunit 4	14425	6.30177e+06	6.71632e+06	7.25314e+06	4.53172e+06	4.61947e+06	4.81093e+06	6.75707e+06	4.65404e+06	1.45187	0.537915	up	5.6782e-06	2.14872e-05	high
Jr12_00160_p1	109019531	Q9FYL2	VIT_18s0001g08780	Anther-specific protein BCP1	50650	187028	256338	198923	155526	140725	146369	214096	147540	1.45111	0.537153	up	0.00870365	0.0174179	med
Jr01_11030_p1	108987422	Q39041	VIT_16s0022g00670	Acid beta-fructofuranosidase 4, vacuolar (At beta fruct4; AtBETAFRUCT4)	73715	1.46419e+07	1.46066e+07	1.34953e+07	9.91313e+06	9.68544e+06	9.86663e+06	1.42479e+07	9.82173e+06	1.45065	0.536703	up	1.97397e-06	8.08225e-06	high
Jr07_28890_p1	108983784	Q9ZU25	VIT_09s0002g03200	Probable mitochondrial-processing peptidase subunit alpha-1, mitochondrial	54267	5.49973e+06	6.19058e+06	6.40892e+06	4.6289e+06	3.92132e+06	3.93533e+06	6.03308e+06	4.16185e+06	1.44961	0.535668	up	5.8374e-05	0.000185894	high
Jr10_02460_p1 (+1)	109002588	Q9FM19	VIT_17s0000g05680	Hypersensitive-induced response protein 1 (AtHIR1)	31347	208100	189595	230076	125610	158602	148940	209257	144384	1.4493	0.53536	up	0.00688046	0.0141208	med
Jr04_02290_p1	109012035	Q8VYN9	VIT_08s0007g01430	Universal stress protein PHOS32	18081	5.52042e+06	4.9191e+06	5.93082e+06	3.81527e+06	3.85324e+06	3.6292e+06	5.45678e+06	3.7659e+06	1.449	0.535054	up	1.80127e-05	6.2759e-05	high
Jr13_06940_p1 (+1)	109012423	Q944K2	VIT_03s0063g02100	Dolichyl-diphosphooligosaccharide--protein glycosyltransferase 48 kDa subunit (Oligosaccharyl transferase 48 kDa subunit)	53238	624923	715071	757803	485523	528806	434117	699266	482815	1.44831	0.534369	up	0.00108888	0.00267538	high
Jr01_10460_p1	108988222	Q9LLC1	VIT_14s0108g01660	Biotin carboxyl carrier protein of acetyl-CoA carboxylase 2, chloroplastic (AtBCCP2; BCCP-2)	29032	151061	146138	301054	136232	141291	135663	199418	137729	1.4479	0.53396	up	0.0882274	0.134941	no
Jr04_10900_p1	108990265	P52410	VIT_10s0003g03070	3-oxoacyl-[acyl-carrier-protein] synthase I, chloroplastic	49476	1.83425e+06	2.62702e+06	2.21696e+06	1.43702e+06	1.60313e+06	1.57226e+06	2.22608e+06	1.53747e+06	1.44788	0.533946	up	0.00147908	0.00354033	high
Jr02_23640_p1 (+3)	#N/A	P41568	VIT_12s0059g02370	Protein translation factor SUI1 homolog 1	12694	2.48354e+06	1.84144e+06	2.70103e+06	1.39951e+06	1.49619e+06	1.96639e+06	2.34201e+06	1.6207e+06	1.44506	0.53113	up	0.00985265	0.01944	med
Jr10_03640_p1	109021652	Q9SI37	VIT_14s0066g00450	WRKY transcription factor 1	39601	568029	691252	673636	430754	494331	412601	644306	445895	1.44497	0.53104	up	0.00138921	0.00334711	high
Jr14_09040_p1	#N/A	Q8L940	VIT_06s0004g06640	Pyridoxal 5'-phosphate synthase subunit PDX1.3 (AtPDX1.3; AtPDX1;1; PLP synthase subunit PDX1.3)	33223	1.19928e+06	1.19208e+06	1.15229e+06	802312	795977	856479	1.18121e+06	818256	1.44358	0.529646	up	7.18537e-05	0.000223847	high
Jr11_18830_p1	109002926	F4HUK6	VIT_18s0122g01440	Probable acyl-activating enzyme 1, peroxisomal	61944	67389.9	98389.1	90369.9	54262.7	66516.4	56674.2	85383	59151.1	1.44347	0.529541	up	0.0258857	0.0464763	med
Jr08_05100_p1 (+2)	108991148	Q9FKK7	VIT_11s0052g01710	Xylose isomerase	56603	5.00006e+07	5.58963e+07	5.35705e+07	3.9963e+07	3.9879e+07	3.06392e+07	5.31558e+07	3.68271e+07	1.44339	0.529462	up	0.000429766	0.00115582	high
Jr13_07500_p1	109013801	Q8LGG8	VIT_03s0038g04750	Universal stress protein A-like protein	19788	521114	752002	539310	418981	474430	362292	604142	418568	1.44335	0.529424	up	0.011254	0.0220006	med
Jr03_13240_p1	108996552	Q09152	VIT_19s0015g01010	Farnesyl pyrophosphate synthase 1, mitochondrial (FPP synthase 1; FPS 1)	39415	1.09884e+06	1.1097e+06	1.45278e+06	883489	971831	682014	1.22044e+06	845778	1.44298	0.529052	up	0.00766241	0.0155513	med
Jr13_08120_p1	108987003	Q8L794	VIT_03s0038g00380	D-ribulose kinase (D-ribulokinase)	53484	5765.33	6642.74	5257.51	1508.81	6042.06	4704.29	5888.53	4085.05	1.44148	0.527538	up	0.266842	0.347221	no
Jr16_22040_p1	108999143	Q8W491	VIT_03s0063g00040	UDP-glycosyltransferase 73B3	54607	1.3022e+06	1.34661e+06	1.2267e+06	1.01191e+06	875553	803801	1.29184e+06	897088	1.44003	0.526103	up	0.000493804	0.00131681	high
Jr06_20840_p1 (+3)	108982470	F4IIU4	VIT_07s0130g00420	187-kDa microtubule-associated protein AIR9	86246	105247	85063.7	114672	46189.2	81344.4	84267.2	101661	70600.3	1.43995	0.526019	up	0.0724681	0.114091	no
Jr12_20380_p1	109009895	Q9M8M7	VIT_09s0002g08670	Acetylornithine aminotransferase, chloroplastic/mitochondrial (ACOAT)	48609	1.545e+07	1.55682e+07	1.53878e+07	1.06836e+07	1.08391e+07	1.0711e+07	1.54687e+07	1.07446e+07	1.43967	0.525741	up	1.49861e-06	6.3164e-06	high
Jr13_09750_p1	108993409	O22265	VIT_03s0038g03560	Signal recognition particle 43 kDa protein, chloroplastic	40739	604612	574464	682383	367184	444437	482068	620486	431230	1.43888	0.524943	up	0.00261612	0.00588985	high
Jr01_04260_p1	108992835	Q9ZUC1	VIT_01s0127g00740	NADPH-dependent alkenal/one oxidoreductase, chloroplastic (AtAOR)	39672	1.21798e+06	1.10851e+06	1.23477e+06	834365	765292	875532	1.18709e+06	825063	1.43879	0.524853	up	0.000213968	0.000606917	high
Jr12_14190_p1	108981229	Q8W034	VIT_05s0049g01660	Heterogeneous nuclear ribonucleoprotein 1 (hnRNP1)	47420	4.23467e+06	3.46235e+06	4.59259e+06	2.19553e+06	3.19758e+06	3.15625e+06	4.09654e+06	2.84979e+06	1.43749	0.523551	up	0.00674297	0.0138992	med
Jr02_18540_p1	108984430	F4JPR7	VIT_02s0025g04050	Plant UBX domain-containing protein 8 (PUX8)	66219	3.80951e+06	3.88241e+06	3.55012e+06	2.25146e+06	2.75628e+06	2.81314e+06	3.74735e+06	2.60696e+06	1.43744	0.523501	up	0.000178771	0.000517321	high
Jr02_22950_p1	109014105	Q8L4N1	VIT_12s0134g00430	Universal stress protein PHOS34	26582	8.30619e+06	1.06366e+07	9.3861e+06	8.00576e+06	5.85915e+06	5.85043e+06	9.44295e+06	6.57178e+06	1.43689	0.522953	up	0.00273567	0.00612552	high
Jr12_25120_p1	109007666	Q8VZW3	VIT_13s0067g02870	Probable chalcone--flavonone isomerase 3 (Chalcone isomerase 3)	23322	1.97275e+07	2.23679e+07	3.19329e+07	1.99828e+07	1.70478e+07	1.46664e+07	2.46761e+07	1.72323e+07	1.43197	0.517999	up	0.0156797	0.0297698	med
Jr10_12110_p1	109001578	Q9XEE2	VIT_18s0001g05530	Annexin D2	36069	5.06268e+06	6.15026e+06	6.58249e+06	3.83082e+06	4.34023e+06	4.26297e+06	5.93181e+06	4.14467e+06	1.43119	0.517214	up	0.000310659	0.000856256	high
Jr03_19220_p1	108980784	F4JJL0	VIT_00s0301g00110	Endonuclease 4 (AtENDO4)	33648	1.51697e+06	1.51366e+06	1.5986e+06	1.06136e+06	1.03545e+06	1.138e+06	1.54308e+06	1.07827e+06	1.43107	0.517089	up	8.33403e-05	0.000256917	high
Jr16_12970_p1	108989395	Q9SZV3	VIT_01s0011g00230	Dihydropteroate synthase	55885	217602	173120	218970	103896	161889	160747	203231	142177	1.42941	0.515424	up	0.0355876	0.0612836	low
Jr12_16040_p1	109005021	O80585	VIT_15s0024g00070	Methylenetetrahydrofolate reductase 2 (AtMTHFR2)	66740	1.03001e+07	1.16264e+07	1.10696e+07	8.8934e+06	8.01401e+06	6.18742e+06	1.09987e+07	7.69828e+06	1.42872	0.514727	up	0.00147457	0.00353469	high
Jr14_02800_p1	109008033	O04905	VIT_15s0045g01310	UMP-CMP kinase 3	23200	2.27252e+07	2.44867e+07	2.5845e+07	1.73337e+07	1.60935e+07	1.77155e+07	2.43523e+07	1.70476e+07	1.42849	0.514491	up	2.09982e-05	7.23197e-05	high
Jr09_09390_p1	108993775	Q3E9F7	VIT_02s0025g02440	Putative U-box domain-containing protein 46	42021	4.50634e+06	5.04059e+06	5.08049e+06	3.61786e+06	3.60518e+06	3.02139e+06	4.87581e+06	3.41481e+06	1.42784	0.513837	up	0.000117831	0.000354676	high
Jr11_08870_p1	109003368	O22707	VIT_14s0030g02020	Probable aldo-keto reductase 3	38507	3.95492e+06	4.75411e+06	4.51581e+06	3.45232e+06	2.85928e+06	2.95134e+06	4.40828e+06	3.08765e+06	1.42772	0.513708	up	0.000267447	0.000744514	high
Jr07_27760_p1	109000239	Q9SKI2	VIT_11s0016g01440	Vacuolar protein sorting-associated protein 2 homolog 1 (AtVPS2-1)	24941	380734	470744	285511	495092	152106	149396	378996	265532	1.42731	0.5133	up	0.293187	0.375863	no
Jr04_20210_p1	109013487	Q9FPT1	VIT_08s0032g00600	Ubiquitin carboxyl-terminal hydrolase 12	130704	19060.3	19755.4	27169	11034.9	22224.4	12993	21994.9	15417.5	1.42662	0.512598	up	0.124415	0.180632	no
Jr03_14680_p1	109021375	Q94A38	VIT_10s0003g03190	La-related protein 6A (AtLARP6a)	47383	736253	664265	753313	450452	539873	519545	717943	503290	1.4265	0.51248	up	0.00100518	0.00248169	high
Jr01_06610_p1	109021872	P82874	VIT_14s0068g02030	Mitochondrial import receptor subunit TOM20-3	22363	128892	127460	145037	87220	92171.5	102103	133796	93831.4	1.42592	0.511895	up	0.00924096	0.0183483	med
Jr01_12810_p1	108998665	Q9LML7	VIT_06s0004g06390	UDP-glycosyltransferase 71C3	52286	11749	13220.3	14158.5	8174.21	11148.2	8135.66	13042.6	9152.71	1.425	0.51095	up	0.0388685	0.0661729	low
Jr07_29760_p1 (+1)	109003716	Q0WVL7	VIT_16s0098g00540	Golgin candidate 5 (AtGC5)	111234	444933	552109	466028	349818	344166	335014	487690	343000	1.42184	0.507757	up	0.00203993	0.00470842	high
Jr07_10860_p1	109004264	B3H5Q1	VIT_07s0005g00410	Beta-glucosidase 11 (AtBGLU11)	57789	84662.8	93878.2	83126.9	78210	54959.4	51023	87222.7	61397.5	1.42062	0.506523	up	0.0377577	0.0643814	low
Jr04_06590_p1	108987266	C0SV51	VIT_00s0181g00220	Calmodulin-binding protein 60 C	70704	58330.9	52790.5	64624.3	38522.9	45569.7	39682.2	58581.9	41258.3	1.41988	0.50577	up	0.019571	0.0362801	med
Jr16_17690_p1	109013338	Q6NPM8	VIT_03s0038g04370	Bifunctional phosphatase IMPL2, chloroplastic	37409	142415	158389	181302	91181.6	122657	125722	160702	113187	1.41979	0.505676	up	0.0235444	0.0427326	med
Jr11_31010_p1	108987672	Q9FGD6	VIT_18s0041g00360	Dof zinc finger protein DOF5.8 (AtDOF5.8)	11979	3.19529e+06	2.94659e+06	2.68979e+06	1.98135e+06	1.89464e+06	2.34584e+06	2.94389e+06	2.07394e+06	1.41946	0.505347	up	0.0005737	0.00150791	high
Jr03_07350_p1	109021786	Q9M0Y8	VIT_19s0014g02750	Vesicle-fusing ATPase	85387	561433	679498	523546	419227	433887	390080	588159	414398	1.41931	0.505189	up	0.00282204	0.00630606	high
Jr08_16740_p1	108990536	Q39255	VIT_03s0038g02500	SKP1-like protein 1A (SKP1-like 1)	17676	1.35952e+06	1.5671e+06	1.56065e+06	1.04391e+06	1.1171e+06	1.00181e+06	1.49576e+06	1.05427e+06	1.41876	0.504628	up	0.000332117	0.000912216	high
Jr02_12700_p1	108994085	Q9LQK7	VIT_02s0012g01050	Protein ABCI7, chloroplastic	53229	191183	166529	197366	97692.2	158869	135156	185026	130572	1.41704	0.502878	up	0.0348643	0.0602584	low
Jr14_17010_p1	108985847	Q9ZNT0	VIT_06s0080g00160	Protein SUPPRESSOR OF K(+) TRANSPORT GROInfH DEFECT 1 (AtSKD1)	48371	2.69564e+06	3.53683e+06	2.6804e+06	2.27454e+06	2.0329e+06	1.98487e+06	2.97096e+06	2.09744e+06	1.41647	0.502298	up	0.00169683	0.00400915	high
Jr12_11980_p1	109005928	Q8LAN3	VIT_05s0020g02220	Probable prolyl 4-hydroxylase 4 (AtP4H4)	33065	1.97099e+06	2.24543e+06	2.06323e+06	1.41357e+06	1.47893e+06	1.5421e+06	2.09322e+06	1.4782e+06	1.41606	0.501881	up	0.000132217	0.000393664	high
Jr07_28700_p1	108981999	O04373	VIT_09s0002g02630	IAA-amino acid hydrolase ILR1-like 4	48745	192300	230107	267487	162787	172774	152467	229965	162676	1.41364	0.499409	up	0.0137302	0.0264493	med
Jr11_14020_p1	109008238	Q8LBZ4	VIT_07s0104g01410	OTU domain-containing protein At3g57810	36341	873734	777069	917451	588706	621403	606692	856085	605600	1.41361	0.499388	up	0.000622929	0.00161667	high
Jr10_24180_p1	108994472	Q9LTC5	VIT_07s0005g03220	Ethylene-responsive transcription factor ERF098	17335	24662.4	34896	21690.8	15500.9	20683.2	21364.5	27083.1	19182.8	1.41184	0.49757	up	0.0748847	0.117533	no
Jr16_21690_p1	109014199	Q9SIV5	VIT_03s0091g00430	Zinc finger CCCH domain-containing protein 19 (AtC3H19)	19753	991064	1.31392e+06	810668	914038	528709	764292	1.03855e+06	735680	1.41169	0.497423	up	0.0577317	0.0941067	low
Jr13_10460_p1 (+3)	108997367	Q38872	VIT_03s0038g03960	Calcium-dependent protein kinase 6	63338	47402.8	48636.8	57295.6	29393.7	41390.6	37836.7	51111.7	36207	1.41165	0.497385	up	0.0361732	0.062065	low
Jr02_25790_p1	108985219	Q8VYE2	VIT_19s0015g00260	Mitochondrial import inner membrane translocase subunit TIM50	42001	231483	274925	239848	194227	171987	162596	248752	176270	1.4112	0.49692	up	0.00764457	0.0155246	med
Jr07_30520_p1	108996364	Q9C969	VIT_09s0002g05250	Aromatic aminotransferase ISS1	43638	158347	179734	196193	148431	124602	106018	178091	126350	1.4095	0.495188	up	0.0220393	0.0403565	med
Jr12_09140_p1 (+2)	109021969	O48844	VIT_10s0042g00800	26S proteasome non-ATPase regulatory subunit 1 homolog A	109109	74767.2	109148	97423.8	82479.6	71346.1	45902	93779.7	66575.9	1.40861	0.494275	up	0.0895324	0.136746	no
Jr13_24360_p1	108996968	Q9FLV0	VIT_13s0047g00210	Protein DOWNY MILDEW RESISTANCE 6 (AtDMR6)	38369	702526	804818	795502	386387	652780	596041	767616	545070	1.40829	0.493944	up	0.026044	0.0467036	med
Jr02_23600_p1	#N/A	Q9LZP7	VIT_19s0177g00360	F-box protein At3g62430	20850	520896	567014	586042	423305	422634	344533	557984	396824	1.40612	0.491724	up	0.00296817	0.00659683	high
Jr07_29240_p1	109004902	O64740	VIT_14s0066g02380	Protein transport protein SEC13 homolog B	32708	928396	1.12319e+06	1.0323e+06	798940	707043	687517	1.02796e+06	731167	1.40592	0.491518	up	0.00133469	0.00322517	high
Jr11_07630_p1	108992024	Q1PF50	VIT_04s0023g03020	Probable serine protease EDA2	55026	913921	987936	976807	700755	767044	585181	959555	684326	1.40219	0.487681	up	0.00229308	0.00524495	high
Jr11_29770_p1 (+1)	108992221	Q9SIU2	VIT_04s0008g06320	Nuclear cap-binding protein subunit 1	32748	293998	181854	336695	88450.3	252769	238532	270849	193250	1.40155	0.487018	up	0.250246	0.328218	no
Jr11_23330_p1	109013980	P31166	VIT_18s0001g09220	Adenine phosphoribosyltransferase 1, chloroplastic (APRT 1; AtAPT1)	19906	4.04315e+06	3.81173e+06	4.92742e+06	2.42443e+06	3.36045e+06	3.33601e+06	4.26077e+06	3.0403e+06	1.40143	0.486902	up	0.00672814	0.0138773	med
Jr04_19400_p1	108981751	Q9M5J9	VIT_08s0007g07690	Polygalacturonase inhibitor 1	36842	890234	847101	915106	579493	710523	604059	884147	631358	1.40039	0.485827	up	0.00142712	0.00343341	high
Jr07_28590_p1	108982905	Q9LX30	VIT_09s0002g02540	eIF-2-alpha kinase GCN2	28705	1.86548e+06	2.02546e+06	1.86337e+06	1.25786e+06	1.42001e+06	1.4339e+06	1.9181e+06	1.37059e+06	1.39947	0.484879	up	0.000307697	0.000849389	high
Jr11_27170_p1	109009509	Q8L493	VIT_04s0008g03730	D-amino-acid transaminase, chloroplastic	44271	502628	509025	427804	341542	336455	351083	479819	343027	1.39878	0.484169	up	0.0025298	0.0057111	high
Jr11_31030_p1	108984856	Q56Z59	VIT_18s0041g00430	Patellin-3	67188	1.06597e+07	1.16638e+07	1.13228e+07	6.55868e+06	9.22128e+06	8.3055e+06	1.12154e+07	8.02849e+06	1.39696	0.482286	up	0.00185314	0.00431963	high
Jr06_17790_p1 (+1)	108989529	O48726	VIT_11s0065g00450	26S proteasome regulatory subunit RPN13 (AtRPN13)	36049	976707	897262	883454	662608	645378	667033	919141	658340	1.39615	0.481455	up	0.000508485	0.00135377	high
Jr01_26680_p1	109009617	Q9SCW1	VIT_11s0016g02200	Beta-galactosidase 1 (Lactase 1)	93178	254639	190764	258785	188829	166835	148870	234729	168178	1.39572	0.481011	up	0.0237135	0.0430159	med
Jr12_02010_p1	108997541	P42731	VIT_04s0023g01470	Polyadenylate-binding protein 2 (PABP-2; Poly(A)-binding protein 2)	40654	890905	859032	863930	615632	611400	646246	871289	624426	1.39534	0.48062	up	0.000429926	0.00115582	high
Jr16_16690_p1	109006572	P45434	VIT_03s0038g01820	Translocon-associated protein subunit alpha (TRAP-alpha)	28317	850542	812674	709357	542390	546544	612894	790858	567276	1.39413	0.479368	up	0.0018512	0.00431816	high
Jr04_14050_p1	108982102	Q9ZVQ4	VIT_12s0035g02100	Glutathione S-transferase Z2 (AtGSTZ2)	25935	240673	257125	268153	180932	174317	194333	255317	183194	1.3937	0.478919	up	0.00591118	0.0123771	med
Jr14_03260_p1	109016494	Q0WVN5	VIT_15s0021g01760	Cellulose synthase-like protein G3 (AtCslG3)	37298	2.92269e+06	2.85678e+06	2.49332e+06	1.96003e+06	1.92198e+06	2.05524e+06	2.7576e+06	1.97908e+06	1.39337	0.478579	up	0.000250497	0.000701477	high
Jr07_32480_p1	109008231	Q9FI78	VIT_09s0018g01190	Shikimate O-hydroxycinnamoyltransferase	48322	367622	386381	366933	334487	250931	219259	373645	268226	1.39302	0.478221	up	0.0210607	0.03878	med
Jr10_17010_p1	109013618	Q9SE83	VIT_12s0028g00830	Dynamin-2A	54796	7.45919e+06	7.64188e+06	6.37054e+06	5.28603e+06	4.99509e+06	5.14345e+06	7.1572e+06	5.14152e+06	1.39204	0.4772	up	0.000142006	0.000419026	high
Jr10_22650_p1_family	108986051	Q94BT0	VIT_11s0118g00200	Sucrose-phosphate synthase 1	118856	167581	148974	157001	97583.5	145808	96799.3	157852	113397	1.39203	0.477192	up	0.0428949	0.0724663	low
Jr07_12180_p1	108986181	Q9M5K3	VIT_05s0020g00380	Dihydrolipoyl dehydrogenase 1, mitochondrial (AtmLPD1; mtLPD1)	54026	7.9583e+07	8.53531e+07	7.55844e+07	6.11676e+07	5.54469e+07	5.6182e+07	8.01735e+07	5.75988e+07	1.39193	0.477087	up	0.000125274	0.000374685	high
Jr07_21010_p1	109007287	Q9LJ98	VIT_05s0020g03500	Probable prefoldin subunit 2	16535	1.86453e+06	2.09832e+06	2.29747e+06	1.36046e+06	1.52439e+06	1.61585e+06	2.08677e+06	1.50023e+06	1.39097	0.47609	up	0.00131528	0.00318529	high
Jr13_05210_p1	109007043	Q9LU85	VIT_12s0034g01210	Probable plastid-lipid-associated protein 4, chloroplastic	27366	1.91918e+07	1.14738e+07	1.60482e+07	6.98825e+06	1.0797e+07	1.58193e+07	1.55712e+07	1.12015e+07	1.3901	0.47519	up	0.131733	0.189686	no
Jr11_04210_p1	108981232	P93655	VIT_14s0060g01230	Lon protease homolog 1, mitochondrial	109237	1.77517e+06	2.01895e+06	1.39106e+06	1.32891e+06	1.24364e+06	1.15788e+06	1.72839e+06	1.24348e+06	1.38997	0.475052	up	0.00667435	0.0137836	med
Jr08_03340_p1	108984311	P46644	VIT_04s0008g03770	Aspartate aminotransferase 3, chloroplastic	52945	1.0632e+07	1.18733e+07	1.25653e+07	8.43534e+06	9.67428e+06	7.15253e+06	1.16902e+07	8.42071e+06	1.38827	0.473283	up	0.0019118	0.00445007	high
Jr05_12270_p1 (+1)	109005170	Q8LBZ4	VIT_06s0080g00850	OTU domain-containing protein At3g57810	58896	14194	12889.6	15180.4	9731.88	10469.6	10274.3	14088	10158.6	1.3868	0.471758	up	0.0313504	0.0549633	low
Jr09_01170_p1	108990325	Q9LZF6	VIT_08s0040g01480	Cell division control protein 48 homolog E (AtCDC48e)	89521	290636	258125	255581	203694	202368	174513	268114	193525	1.38542	0.470328	up	0.00889103	0.0177175	med
Jr04_05890_p1_family	108997931	Q9FLG1	VIT_08s0032g00470	Beta-D-xylosidase 4 (AtBXL4)	68791	7.33593e+06	7.35003e+06	7.29575e+06	5.80935e+06	5.60624e+06	4.47129e+06	7.32724e+06	5.29563e+06	1.38364	0.468468	up	0.000758318	0.00193753	high
Jr02_16140_p1	109019652	P42697	VIT_02s0025g01570	Dynamin-related protein 1A	68492	440607	449452	394788	311475	331609	285546	428282	309543	1.38359	0.46842	up	0.00436729	0.00943906	high
Jr09_14580_p1	108993199	Q9S7M0	VIT_19s0014g03660	Chlorophyll a-b binding protein 3, chloroplastic	29166	1.46511e+07	1.04953e+07	1.07556e+07	8.45691e+06	7.11559e+06	1.03812e+07	1.19673e+07	8.65124e+06	1.3833	0.468118	up	0.0181075	0.0338334	med
Jr06_04320_p1 (+3)	#N/A	Q944K3	VIT_04s0008g00910	Histone deacetylase 2	41483	1.60408e+06	1.68595e+06	1.61462e+06	1.3165e+06	1.21174e+06	1.02145e+06	1.63489e+06	1.18323e+06	1.38172	0.466461	up	0.00181308	0.00423824	high
Jr03_02350_p1	#N/A	Q9SVD7	VIT_08s0007g02580	Ubiquitin-conjugating enzyme E2 variant 1D (Ubc enzyme variant 1D)	16552	1.88864e+06	2.22495e+06	1.63247e+06	1.44122e+06	1.36977e+06	1.3505e+06	1.91535e+06	1.38716e+06	1.38077	0.465474	up	0.00311688	0.0069034	high
Jr15_00600_p1 (+1)	108982539	F4JAU2	VIT_18s0164g00040	SAC3 family protein B	59119	190436	213678	161409	113975	146089	149720	188508	136595	1.38005	0.464724	up	0.031837	0.0556684	low
Jr03_23520_p1_family	#N/A	P22953	VIT_06s0004g04510	Probable mediator of RNA polymerase II transcription subunit 37e	64622	2.7797e+07	3.09699e+07	2.98289e+07	2.46268e+07	2.0227e+07	1.93691e+07	2.95319e+07	2.14076e+07	1.37951	0.464152	up	0.000980851	0.00242709	high
Jr06_08790_p1	108995553	Q9FT92	VIT_18s0001g12350	Uncharacterized protein At5g08430	202584	93934.2	120427	82656.8	98759.2	58662.2	57980.6	99006.2	71800.7	1.3789	0.463521	up	0.117722	0.172603	no
Jr07_15930_p1	108987343	Q9C5Z2	VIT_05s0062g01080	Eukaryotic translation initiation factor 3 subunit H (eIF3h)	38500	1.54605e+06	1.40771e+06	1.4593e+06	1.11613e+06	1.11706e+06	968673	1.47102e+06	1.06729e+06	1.37828	0.462869	up	0.000927665	0.00230935	high
Jr06_02560_p1 (+2)	108984751	Q9SDQ3	VIT_18s0001g15270	Scarecrow-like protein 1 (AtSCL1)	63767	33949.5	42895.3	27758.4	29334.4	22847.5	23715.6	34867.7	25299.1	1.37822	0.4628	up	0.0735747	0.115642	no
Jr13_30530_p1	109010845	Q6DST1	VIT_16s0050g01650	Late embryogenesis abundant protein At1g64065	20791	1.69568e+06	1.38449e+06	1.60521e+06	1.05118e+06	1.14842e+06	1.20411e+06	1.5618e+06	1.13457e+06	1.37655	0.461061	up	0.00183033	0.00427553	high
Jr10_09040_p1	108996808	F4JVN6	VIT_16s0050g00490	Tripeptidyl-peptidase 2	149832	1.26471e+06	1.13186e+06	1.15184e+06	1.02822e+06	868083	681908	1.1828e+06	859405	1.3763	0.460798	up	0.0128127	0.0248123	med
Jr07_21430_p1 (+1)	108983080	Q9FN48	VIT_05s0094g00820	Calcium sensing receptor, chloroplastic	73720	443442	416855	727047	338784	432490	382747	529114	384674	1.37549	0.459944	up	0.0684715	0.10871	no
Jr13_10750_p1	108997431	O23390	VIT_01s0150g00640	Baruol synthase (AtBARS1)	23238	12734.5	7860.82	14390.2	8855.23	8380.96	8212.94	11661.8	8483.04	1.37472	0.459136	up	0.110555	0.163476	no
Jr04_09760_p1	109015232	F4IS56	VIT_10s0003g02060	Integrin-linked protein kinase 1	58185	481395	610856	433112	425991	353643	330489	508455	370041	1.37405	0.458434	up	0.0223124	0.0407886	med
Jr07_02750_p1	108995322	O23171	VIT_00s0253g00150	Methylesterase 9 (AtMES9)	24291	1.19558e+06	1.26587e+06	1.19505e+06	948624	863747	850829	1.21883e+06	887734	1.37297	0.457304	up	0.000791638	0.00201175	high
Jr12_04810_p1	109012274	O04616	VIT_15s0046g01470	Protein CURVATURE THYLAKOID 1A, chloroplastic	22237	4.12962e+06	2.66254e+06	2.64554e+06	2.12889e+06	2.34667e+06	2.40087e+06	3.1459e+06	2.29214e+06	1.37247	0.456776	up	0.0242091	0.0437223	med
Jr12_01070_p1	108985772	O82659	VIT_07s0031g00700	Probable calcium-binding protein CML20	19213	1.68645e+06	1.85031e+06	1.71026e+06	1.32762e+06	1.27526e+06	1.22162e+06	1.74901e+06	1.27484e+06	1.37195	0.456225	up	0.000476648	0.00127415	high
Jr07_20810_p1	109018719	F4J2K4	VIT_05s0020g03370	Kinesin-like protein KIN-7O	36679	1.52689e+06	1.6131e+06	2.19396e+06	1.20248e+06	1.33884e+06	1.34793e+06	1.77798e+06	1.29642e+06	1.37146	0.455712	up	0.0107397	0.0210577	med
Jr10_15160_p1	109004243	F4JIF4	VIT_12s0028g03730	Protein NETWORKED 1B	57747	233403	237270	238891	128940	188898	199601	236521	172480	1.3713	0.455545	up	0.0404354	0.0686985	low
Jr03_09380_p1	109003585	O82179	VIT_01s0011g01990	Glycine cleavage system H protein 2, mitochondrial	16886	1.38423e+06	1.4123e+06	1.60198e+06	1.02192e+06	962626	1.22394e+06	1.46617e+06	1.0695e+06	1.3709	0.455123	up	0.00373944	0.0081462	high
Jr06_01940_p1	109011431	F4HWF9	VIT_18s0166g00240	Nuclear speckle RNA-binding protein B (AtNSRB)	28024	153012	130579	164700	84751	135532	106817	149430	109033	1.3705	0.454704	up	0.0613223	0.0988354	low
Jr13_24070_p1	108992297	P31170	VIT_16s0098g01060	Heat shock protein 21, chloroplastic	27782	1.71337e+07	4.39888e+07	9.00563e+06	2.24869e+07	2.24178e+07	6.27228e+06	2.3376e+07	1.7059e+07	1.37031	0.454501	up	0.479592	0.566948	no
Jr04_04310_p1	109020874	P43287	VIT_13s0019g04280	Aquaporin PIP2-2	30488	136031	84059.6	165241	99229.3	91800	90214.1	128444	93747.8	1.3701	0.454282	up	0.106386	0.15795	no
Jr11_19090_p1_family	108984515	Q9SII8	VIT_09s0054g01880	Ubiquitin domain-containing protein DSK2b	96765	2.82329e+06	2.80944e+06	2.8301e+06	2.22577e+06	2.02068e+06	1.93824e+06	2.82094e+06	2.06156e+06	1.36835	0.45244	up	0.000301236	0.000833647	high
Jr12_05690_p1	109010403	Q8H100	VIT_15s0048g02950	Probable ADP-ribosylation factor GTPase-activating protein AGD8 (ARF GAP AGD8)	44223	638498	688681	818952	600736	552470	415429	715377	522878	1.36815	0.452229	up	0.0224242	0.0409474	med
Jr15_03030_p1	109008886	Q8VZH2	VIT_04s0008g01430	Aminopeptidase M1	102543	58329.5	66862.4	112749	43427.8	70866.6	59656.1	79313.6	57983.5	1.36787	0.451926	up	0.169932	0.236528	no
Jr14_08360_p1	108996984	O64733	VIT_06s0004g07240	UDP-glycosyltransferase 87A2	51497	481849	563563	629889	396799	451380	376587	558434	408255	1.36786	0.451916	up	0.0100575	0.0197907	med
Jr14_13650_p1	108990116	Q9FF55	VIT_06s0004g02890	Protein disulfide isomerase-like 1-4 (AtPDIL1-4)	65949	4.81167e+07	5.03399e+07	5.50024e+07	3.68325e+07	3.79482e+07	3.74214e+07	5.1153e+07	3.74007e+07	1.3677	0.451756	up	0.000174231	0.000504628	high
Jr13_14540_p1	109014362	Q9C5W6	VIT_01s0011g00620	14-3-3-like protein GF14 iota	29582	43406.8	41694.9	54042.9	38103.2	27787.2	35873.3	46381.5	33921.2	1.36733	0.45136	up	0.06265	0.100842	no
Jr03_02900_p1	109010214	Q39079	VIT_08s0032g00960	Chaperone protein dnaJ 13 (AtDjB13; AtJ13)	32749	353370	355401	380087	223376	266529	307062	362953	265656	1.36625	0.450224	up	0.015822	0.0299709	med
Jr05_11950_p1	108997820	Q8GXR9	VIT_06s0009g00680	Alternative NAD(P)H-ubiquinone oxidoreductase C1, chloroplastic/mitochondrial	40376	95627	114220	84423.3	73033.8	77167.5	65341.2	98090.1	71847.5	1.36525	0.44917	up	0.0406808	0.0690443	low
Jr07_06280_p1	109005716	Q9FL59	VIT_15s0046g03030	FT-interacting protein 1	115064	488825	517472	562026	345760	396846	406333	522775	382980	1.36502	0.448921	up	0.00525542	0.0111323	med
Jr16_05120_p1 (+1)	109007536	O23095	VIT_16s0098g01010	60S acidic ribosomal protein P1-2	11395	387361	420540	487780	293850	302798	352613	431894	316420	1.36494	0.448835	up	0.0118288	0.0230424	med
Jr07_02940_p1	108995388	O23166	VIT_00s0207g00270	Thioredoxin-like protein HCF164, chloroplastic	28073	931692	1.10254e+06	785828	612352	719822	733974	940022	688716	1.36489	0.448784	up	0.0125681	0.024396	med
Jr16_12530_p1	109003115	Q9T0K2	VIT_01s0011g00850	Cytochrome P450 71A20	23665	2.40461e+06	2.20604e+06	2.07384e+06	1.19014e+06	1.35476e+06	2.35295e+06	2.22816e+06	1.63262e+06	1.36478	0.448667	up	0.0874646	0.133898	no
Jr01_12170_p1	108998526	Q9SGQ0	VIT_16s0100g01210	Transcription factor VOZ1	23491	256144	408842	252372	417083	135881	119274	305786	224079	1.36463	0.448513	up	0.365993	0.45231	no
Jr11_22000_p1	109003912	Q9LEU8	VIT_18s0001g07590	Argininosuccinate lyase, chloroplastic	57357	1.47852e+06	1.50683e+06	1.81329e+06	1.01099e+06	1.3755e+06	1.13103e+06	1.59955e+06	1.17251e+06	1.36421	0.448067	up	0.00974883	0.0192523	med
Jr16_06760_p1	108986474	Q9XFS9	VIT_01s0011g05860	1-deoxy-D-xylulose 5-phosphate reductoisomerase, chloroplastic (1-deoxyxylulose-5-phosphate reductoisomerase; DXP reductoisomerase)	45346	7.7725e+06	8.37085e+06	7.23796e+06	5.95239e+06	5.52961e+06	5.66635e+06	7.79377e+06	5.71612e+06	1.36347	0.447286	up	0.000185317	0.000533919	high
Jr13_00710_p1 (+1)	108988900	Q93W20	VIT_12s0035g00770	NifU-like protein 2, chloroplastic (AtCNfu2; AtCnfU-V)	25143	224719	223958	213201	152276	172993	160772	220626	162014	1.36177	0.445484	up	0.0115698	0.0225778	med
Jr08_10510_p1	109000493	Q9SBB2	VIT_07s0005g02430	Protein ABC transporter 1, mitochondrial (ABC1At; AtABC1)	67810	83550.1	89080	79665.3	78904.5	57710.5	48730.6	84098.4	61781.9	1.36122	0.444894	up	0.0732324	0.115214	no
Jr13_14000_p1	109014399	Q9ZPQ3	VIT_17s0000g04890	D-aminoacyl-tRNA deacylase	34799	3.94082e+06	4.06017e+06	4.9958e+06	2.98752e+06	3.20088e+06	3.36026e+06	4.33227e+06	3.18288e+06	1.36111	0.444787	up	0.00181005	0.00423417	high
Jr04_05820_p1	108997930	O50008	VIT_08s0056g01570	5-methyltetrahydropteroyltriglutamate--homocysteine methyltransferase 1	84742	8.4167e+06	1.00067e+07	1.04397e+07	8.1343e+06	7.78573e+06	5.28646e+06	9.62104e+06	7.06883e+06	1.36105	0.444722	up	0.0210943	0.0388202	med
Jr02_06920_p1 (+1)	108994195	Q96250	VIT_17s0000g07300	ATP synthase subunit gamma, mitochondrial	35001	1.11339e+06	591054	1.13149e+06	631039	703410	749644	945311	694698	1.36075	0.444404	up	0.0898749	0.137206	no
Jr10_18340_p1	108995843	Q9SKI2	VIT_11s0016g01440	Vacuolar protein sorting-associated protein 2 homolog 1 (AtVPS2-1)	25277	307826	313842	294940	278639	195057	200173	305536	224623	1.36022	0.443835	up	0.0309728	0.054388	low
Jr14_09340_p1 (+1)	#N/A	Q9LUX9	VIT_06s0004g06340	Probable NAD(P)H dehydrogenase (quinone) FQR1-like 3	22590	41428.1	48912.6	47535.4	45741.9	26600.5	29100.6	45958.7	33814.3	1.35915	0.442701	up	0.111794	0.164894	no
Jr02_19030_p1	109010785	Q9LD47	VIT_02s0025g04830	Copper chaperone for superoxide dismutase, chloroplastic/cytosolic (AtCCS)	34260	5.76838e+06	6.20457e+06	6.38824e+06	4.34556e+06	4.45203e+06	4.71495e+06	6.1204e+06	4.50418e+06	1.35883	0.44236	up	0.000140908	0.00041728	high
Jr10_05080_p1	108987071	Q84L31	VIT_14s0006g03040	Ubiquitin receptor RAD23c (AtRAD23c)	48250	4.15981e+06	4.53404e+06	4.45324e+06	3.52818e+06	2.94239e+06	3.20939e+06	4.38236e+06	3.22665e+06	1.35818	0.44167	up	0.000536266	0.00141857	high
Jr11_10930_p1	108993625	Q9AT00	VIT_04s0023g00290	Protein TRIGALACTOSYLDIACYLGLYCEROL 3, chloroplastic	38065	1.42317e+06	1.1032e+06	1.41065e+06	786702	1.05471e+06	1.05848e+06	1.31234e+06	966631	1.35764	0.441104	up	0.0182606	0.0340616	med
Jr13_17590_p1	108985453	Q9LF50	VIT_01s0026g00750	Maltose excess protein 1, chloroplastic	19745	1.08629e+06	1.02989e+06	957749	692522	747275	825141	1.02464e+06	754979	1.35718	0.440613	up	0.00294535	0.00655053	high
Jr06_05680_p1	109001179	Q9S7L9	VIT_13s0067g03800	Cytochrome c oxidase subunit 6b-1 (AtCOX6b-1)	21262	6.10332e+06	6.33696e+06	7.22042e+06	4.99397e+06	5.02662e+06	4.4775e+06	6.55357e+06	4.8327e+06	1.35609	0.439451	up	0.000593082	0.0015502	high
Jr11_16590_p1	109004142	Q9ZST4	VIT_07s0005g02010	Nitrogen regulatory protein P-II homolog	21425	2.04574e+07	2.25788e+07	2.14702e+07	1.55162e+07	1.57428e+07	1.63278e+07	2.15021e+07	1.58623e+07	1.35555	0.438879	up	0.000135323	0.000402549	high
Jr02_20440_p1	109011912	Q9SYM5	VIT_19s0014g00290	UDP-4-keto-6-deoxy-D-glucose 3,5-epimerase/UDP-4-keto-L-rhamnose 4-keto-reductase	75523	315445	338300	289678	202725	254217	239173	314474	232038	1.35527	0.438579	up	0.0162331	0.0306439	med
Jr01_12180_p1 (+1)	108998655	Q9LTK0	VIT_16s0100g01230	Protein phosphatase inhibitor 2 (AtI-2; IPP-2)	21519	1.23564e+06	1.35001e+06	1.30458e+06	939906	952687	978009	1.29674e+06	956867	1.35519	0.438498	up	0.000896393	0.00223827	high
Jr05_07430_p1	#N/A	Q8L940	VIT_06s0004g06640	Pyridoxal 5'-phosphate synthase subunit PDX1.3 (AtPDX1.3; AtPDX1;1; PLP synthase subunit PDX1.3)	33328	263835	182593	291614	127324	185097	232337	246014	181586	1.35481	0.43809	up	0.132095	0.190042	no
Jr14_12240_p1 (+1)	108993960	Q9LX73	VIT_06s0004g03970	E3 UFM1-protein ligase 1 homolog	93311	113800	123534	109597	88987.9	94691.1	72613	115644	85430.7	1.35366	0.436862	up	0.037276	0.0636919	low
Jr03_14350_p1	108983267	Q9LRR9	VIT_19s0093g00510	(S)-2-hydroxy-acid oxidase GLO1	40336	2.40216e+07	2.42132e+07	2.263e+07	1.87082e+07	1.7662e+07	1.5989e+07	2.36216e+07	1.74531e+07	1.35343	0.436623	up	0.00035783	0.00097633	high
Jr10_20050_p1	108979117	Q7Y228	VIT_11s0016g03010	Probable glutamate carboxypeptidase LAMP1	77967	98152.3	79291.2	115712	23126.3	100031	93584.5	97718.5	72247.2	1.35256	0.43569	up	0.389909	0.476205	no
Jr09_14340_p1	108993066	Q9LV77	VIT_19s0014g03130	Asparagine synthetase [glutamine-hydrolyzing] 2	28255	381257	379768	461561	144421	363211	396300	407528	301311	1.35252	0.435649	up	0.230385	0.305819	no
Jr07_04840_p1	108991264	Q8S8F8	VIT_18s0001g07130	GLABRA2 expression modulator	32222	1.11658e+06	1.19239e+06	1.05232e+06	816678	821619	847279	1.12043e+06	828525	1.35232	0.435432	up	0.0014662	0.00351718	high
Jr03_00060_p1 (+3)	109000409	Q9FPW4	VIT_08s0007g07570	Probable NOT transcription complex subunit VIP2	97223	90227.9	95958.4	90582.2	63804.5	78279.5	62799.4	92256.2	68294.5	1.35086	0.433876	up	0.037072	0.0634217	low
Jr10_03590_p1	109021647	Q8W034	VIT_14s0066g00480	Heterogeneous nuclear ribonucleoprotein 1 (hnRNP1)	42477	956906	1.08772e+06	1.14775e+06	722560	815015	825650	1.06412e+06	787742	1.35085	0.433871	up	0.0039399	0.00855462	high
Jr02_24610_p1	108984324	Q8H107	VIT_10s0116g01480	Dihydrolipoyllysine-residue succinyltransferase component of 2-oxoglutarate dehydrogenase complex 2, mitochondrial	51597	1.58152e+06	1.46091e+06	1.43174e+06	1.06364e+06	1.09306e+06	1.15917e+06	1.49139e+06	1.10529e+06	1.34932	0.432233	up	0.00120321	0.0029311	high
Jr13_00750_p1	108988890	Q9LU40	VIT_03s0063g00500	Protein MANNAN SYNTHESIS-RELATED 1 (AtMSR1)	18717	966428	971026	852689	787363	570775	712252	930048	690130	1.34764	0.430436	up	0.0127997	0.0248018	med
Jr11_00650_p1 (+1)	108985178	O81796	VIT_04s0210g00180	Isocitrate dehydrogenase [NAD] regulatory subunit 3, mitochondrial	40778	4.35655e+06	4.2019e+06	4.26508e+06	3.00154e+06	3.15443e+06	3.3656e+06	4.27451e+06	3.17386e+06	1.34679	0.429522	up	0.000256094	0.000715328	high
Jr12_10030_p1	108994829	Q9SEE5	VIT_05s0077g00690	Galactokinase	54686	6.34075e+06	7.03343e+06	6.54124e+06	4.94251e+06	5.0707e+06	4.77742e+06	6.63847e+06	4.93021e+06	1.34649	0.429203	up	0.000187808	0.000540154	high
Jr12_06280_p1 (+2)	109001473	Q9FMK9	VIT_15s0048g02230	Probable inactive purple acid phosphatase 29	43047	1.35839e+06	2.46561e+06	1.48055e+06	1.93139e+06	1.08884e+06	920519	1.76818e+06	1.31358e+06	1.34608	0.428762	up	0.208663	0.281982	no
Jr13_05970_p1	109002336	Q9SMN0	VIT_03s0063g00750	Probable carboxylesterase 12	35439	2.71909e+07	2.73525e+07	2.91461e+07	2.05885e+07	2.13511e+07	2.0236e+07	2.78965e+07	2.07252e+07	1.34602	0.428697	up	0.000174058	0.00050457	high
Jr04_11830_p1	109016022	Q9SUI5	VIT_10s0003g04350	Photosystem I reaction center subunit psaK, chloroplastic	13055	5.90741e+06	3.01546e+06	1.83542e+06	2.26957e+06	1.96526e+06	3.76371e+06	3.5861e+06	2.66618e+06	1.34503	0.427642	up	0.325097	0.409289	no
Jr01_22800_p1	108993502	Q9SHJ6	VIT_12s0142g00180	Peroxisomal and mitochondrial division factor 2	37983	8.49279e+06	8.8101e+06	9.1237e+06	5.77605e+06	6.84211e+06	7.04006e+06	8.80886e+06	6.55274e+06	1.3443	0.426857	up	0.000896296	0.00223827	high
Jr06_00860_p1	108991522	O49323	VIT_18s0164g00040	Cellulose synthase-like protein D1 (AtCslD1)	59660	129667	141813	114448	102438	90031.6	94634.6	128643	95701.3	1.34421	0.42676	up	0.033638	0.058507	low
Jr12_19930_p1	109013902	Q38882	VIT_09s0002g06760	Phospholipase D alpha 1 (AtPLDalpha1; PLD alpha 1)	92034	2.31388e+06	2.49908e+06	2.96879e+06	2.01364e+06	2.27582e+06	1.50947e+06	2.59392e+06	1.93298e+06	1.34193	0.424306	up	0.0270559	0.0482295	med
Jr16_16770_p1	109006565	Q9T0I8	VIT_03s0038g01440	5'-methylthioadenosine/S-adenosylhomocysteine nucleosidase 1 (AtMTN1)	27902	8.21041e+06	9.18725e+06	8.36861e+06	6.66682e+06	6.25064e+06	6.28952e+06	8.58876e+06	6.40232e+06	1.34151	0.423854	up	0.00028356	0.000787375	high
Jr12_09480_p1_family	108989313	O23016	VIT_05s0051g00650	Probable voltage-gated potassium channel subunit beta	36581	2.18026e+06	2.24452e+06	2.26221e+06	1.67037e+06	1.72944e+06	1.58539e+06	2.229e+06	1.66174e+06	1.34137	0.423705	up	0.000624869	0.00162043	high
Jr12_20340_p1 (+2)	109009900	F4I171	VIT_13s0067g02320	Mediator of RNA polymerase II transcription subunit 15a	18986	63435	94060.9	72171.6	59397.5	57738.8	54099.6	76555.8	57078.7	1.34123	0.423559	up	0.0694928	0.109908	no
Jr13_14750_p1	109002884	Q67Y99	VIT_01s0011g00880	Clp protease adapter protein ClpF, chloroplastic	38435	130535	137060	146665	86733	120941	101203	138086	102959	1.34117	0.423496	up	0.0472524	0.0786233	low
Jr08_18970_p1	108985549	Q94AM1	VIT_06s0061g01070	Organellar oligopeptidase A, chloroplastic/mitochondrial	87491	2.42089e+06	2.5681e+06	2.77821e+06	1.97627e+06	2.18677e+06	1.6306e+06	2.58907e+06	1.93121e+06	1.34065	0.422928	up	0.00658119	0.0136168	med
Jr08_06040_p1	109007504	Q9SIE0	VIT_18s0001g05480	DNA oxidative demethylase ALKBH2	31961	116231	142997	141890	100105	104510	94741.5	133706	99785.6	1.33993	0.422159	up	0.0348444	0.0602559	low
Jr03_11830_p1	#N/A	Q8RWU7	VIT_10s0116g00210	Plant UBX domain-containing protein 4 (PUX4)	32603	6.34036e+06	6.9915e+06	6.48043e+06	4.90636e+06	4.85972e+06	5.02635e+06	6.6041e+06	4.93081e+06	1.33935	0.421537	up	0.000207157	0.000589119	high
Jr03_19120_p1 (+1)	108987490	Q9S9T7	VIT_00s0404g00080	Vacuolar protein sorting-associated protein 28 homolog 2	23295	853614	685224	792863	461596	558979	720445	777233	580340	1.33927	0.421449	up	0.0408687	0.0693274	low
Jr13_05840_p1	109002327	Q8GSJ1	VIT_12s0035g00760	ATP phosphoribosyltransferase 2, chloroplastic (ATP-PRTase 2; AtATP-PRT2)	46842	957587	1.06164e+06	872145	879841	689957	589303	963790	719700	1.33915	0.421322	up	0.0287591	0.0509624	low
Jr01_07280_p1 (+1)	108988114	P58223	VIT_14s0006g02960	KH domain-containing protein At4g18375	73550	79823.9	92012.8	86235.5	72978.9	60271.6	59476	86024.1	64242.2	1.33906	0.421218	up	0.0455694	0.0762807	low
Jr14_21480_p1	109001668	O82254	VIT_06s0004g00940	Putative glutaredoxin-C12 (AtGrxC12)	27620	245985	286369	255998	221648	188143	179105	262784	196299	1.33869	0.420824	up	0.0240265	0.0434879	med
Jr08_01400_p1	108985146	Q8LF20	VIT_04s0008g05540	Putative clathrin assembly protein At2g25430	72227	86611.1	81295.7	88095.1	62677.2	71118.9	57501.7	85334	63765.9	1.33824	0.420334	up	0.041385	0.070131	low
Jr12_06970_p1	108986174	Q9LXS6	VIT_12s0142g00610	Citrate synthase 2, peroxisomal	56596	2.59434e+06	2.50139e+06	3.03777e+06	1.77841e+06	2.38664e+06	1.91535e+06	2.71117e+06	2.0268e+06	1.33766	0.419712	up	0.0107865	0.0211369	med
Jr07_27440_p1	109001974	Q9LNR3	VIT_09s0002g01080	Lipoxygenase 3, chloroplastic (AtLOX3)	104030	112715	103761	121239	86262.4	88325.4	77923.6	112572	84170.5	1.33743	0.41946	up	0.0348446	0.0602559	low
Jr14_11550_p1 (+1)	#N/A	Q9SN95	VIT_13s0019g00840	UDP-glucuronic acid decarboxylase 5	39093	2.34847e+06	2.26372e+06	2.75648e+06	1.26956e+06	2.1527e+06	2.08846e+06	2.45622e+06	1.83691e+06	1.33715	0.419163	up	0.0607241	0.098063	low
Jr05_13030_p1_family	109000669	Q9SGE0	VIT_03s0017g00680	UDP-D-apiose/UDP-D-xylose synthase 2	43367	1.83654e+06	1.85681e+06	2.01688e+06	1.3205e+06	1.49119e+06	1.46011e+06	1.90341e+06	1.42393e+06	1.33673	0.418704	up	0.00164569	0.0038995	high
Jr15_07390_p1 (+1)	109020114	Q8LGG8	VIT_01s0011g03680	Universal stress protein A-like protein	18522	852161	841344	652270	648688	484154	622979	781925	585274	1.336	0.417919	up	0.0280606	0.0498173	med
Jr04_02790_p1	109006804	Q9LZM1	VIT_06s0004g04930	Oxysterol-binding protein-related protein 3A	51959	2.194e+06	2.48094e+06	2.34328e+06	1.28691e+06	1.96143e+06	2.00562e+06	2.33941e+06	1.75132e+06	1.3358	0.417699	up	0.0332479	0.0579203	low
Jr02_15590_p1	#N/A	Q39043	VIT_02s0025g02140	Mediator of RNA polymerase II transcription subunit 37f	73399	2.34938e+08	2.51484e+08	2.14662e+08	1.74502e+08	1.76616e+08	1.73883e+08	2.33695e+08	1.75e+08	1.3354	0.417269	up	0.000943275	0.00234467	high
Jr03_14170_p1	109011069	Q66GR8	VIT_10s0003g04030	Protein NETWORKED 3A	101216	15689.3	10633.4	20005.6	7986.34	13408.2	13313.2	15442.7	11569.2	1.33481	0.416631	up	0.214893	0.288776	no
Jr07_20310_p1	109010475	O65041	VIT_05s0020g02820	NEDD8-activating enzyme E1 catalytic subunit	49267	2.00796e+06	1.644e+06	1.88723e+06	1.11896e+06	1.50435e+06	1.53212e+06	1.8464e+06	1.38514e+06	1.333	0.414678	up	0.0176561	0.0330839	med
Jr13_16380_p1	108983448	Q93ZD7	VIT_01s0026g01470	Magnesium transporter MRS2-4	49640	1.61177e+06	1.94087e+06	1.71331e+06	1.36189e+06	1.31618e+06	1.27315e+06	1.75532e+06	1.31707e+06	1.33274	0.414393	up	0.00286918	0.00639407	high
Jr10_10090_p1	#N/A	Q94CE5	VIT_03s0017g01760	Gamma-aminobutyrate transaminase POP2, mitochondrial (AtGABA-T)	17164	1.85504e+06	2.10439e+06	1.85172e+06	1.53898e+06	1.44585e+06	1.37654e+06	1.93705e+06	1.45379e+06	1.33242	0.414046	up	0.00221919	0.00508654	high
Jr09_04410_p1	#N/A	Q93Y35	VIT_17s0000g10250	26S proteasome non-ATPase regulatory subunit 6 homolog	53843	1.4251e+06	1.59153e+06	1.39908e+06	1.15821e+06	1.24447e+06	912635	1.4719e+06	1.10511e+06	1.33191	0.413497	up	0.0129491	0.0250324	med
Jr12_24120_p1	108980687	O04202	VIT_13s0019g03470	Eukaryotic translation initiation factor 3 subunit F (eIF3f)	31249	3.53553e+06	3.35042e+06	3.68962e+06	2.62495e+06	2.76822e+06	2.5483e+06	3.52519e+06	2.64716e+06	1.33169	0.413259	up	0.000613269	0.00159537	high
Jr13_26250_p1	108988339	Q9XF91	VIT_18s0001g02740	Photosystem II 22 kDa protein, chloroplastic	29084	1.06966e+07	8.70909e+06	8.55402e+06	6.11912e+06	7.02365e+06	7.8543e+06	9.31991e+06	6.99902e+06	1.3316	0.413163	up	0.00737865	0.0150588	med
Jr13_03920_p1	108984991	P46077	VIT_18s0001g06330	14-3-3-like protein GF14 phi	28795	9.9747e+06	1.15218e+07	9.65804e+06	9.11998e+06	7.25868e+06	7.01968e+06	1.03848e+07	7.79945e+06	1.33148	0.413034	up	0.00666729	0.0137777	med
Jr12_22960_p1	108982983	P52901	VIT_13s0019g00510	Pyruvate dehydrogenase E1 component subunit alpha-1, mitochondrial (PDHE1-A)	115654	7.7786e+06	8.15332e+06	7.93111e+06	6.90627e+06	6.13775e+06	4.8813e+06	7.95434e+06	5.97511e+06	1.33125	0.412778	up	0.00733165	0.0149722	med
Jr07_01390_p1 (+3)	109009126	O22187	VIT_07s0129g00990	Probable receptor-like protein kinase At2g23200	94347	174840	246100	156303	153033	139797	141228	192414	144686	1.32987	0.411289	up	0.0749311	0.11755	no
Jr11_04360_p1	108987897	O80480	VIT_14s0060g00930	Importin subunit alpha-4 (IMPa-4)	59798	102057	111919	153383	104853	84749.1	86676.2	122453	92092.9	1.32967	0.411062	up	0.0871334	0.133515	no
Jr14_08180_p1 (+1)	108996934	B9DFS6	VIT_06s0004g07430	Sorting nexin 2B	63403	647955	725496	595135	507695	489732	484356	656195	493928	1.32852	0.409825	up	0.00756971	0.0154011	med
Jr13_12120_p1	108984363	Q9FT92	VIT_14s0068g01650	Uncharacterized protein At5g08430	178223	20409.5	27444.3	24475.2	19544.8	17810.7	17168	24109.7	18174.5	1.32657	0.407691	up	0.0767077	0.119995	no
Jr14_19220_p1	108994661	F4I9J7	VIT_04s0044g01140	RNA-binding protein Y14 (AtY14)	22574	929890	771253	1.19985e+06	539933	784966	862643	966998	729180	1.32614	0.407236	up	0.0929925	0.140986	no
Jr07_11770_p1	109010771	P57741	VIT_05s0077g00740	Probable prefoldin subunit 3	22928	1.32478e+06	1.31683e+06	1.57857e+06	843310	1.16737e+06	1.17528e+06	1.40673e+06	1.06198e+06	1.32462	0.405581	up	0.0266263	0.0475151	med
Jr05_04610_p1_family	109005597	Q9FMC5	VIT_13s0073g00330	Vacuolar protein sorting-associated protein 60.2	26424	2.96068e+06	3.16577e+06	3.05694e+06	2.38241e+06	2.32704e+06	2.22813e+06	3.06113e+06	2.31252e+06	1.32372	0.404595	up	0.000712955	0.00183157	high
Jr03_15390_p1	108998076	Q39224	VIT_10s0003g02450	Protein SRG1 (AtSRG1)	40057	1.91778e+06	2.25094e+06	1.5197e+06	1.58493e+06	1.39742e+06	1.31532e+06	1.89614e+06	1.43255e+06	1.32361	0.404475	up	0.0264203	0.0471985	med
Jr13_21070_p1	108991577	Q5XVA8	VIT_01s0137g00500	Uncharacterized protein At3g49055	78770	86628	98282.4	93043.9	81151.9	65574.9	63419.9	92651.4	70048.9	1.32267	0.40345	up	0.0581462	0.0946419	low
Jr06_13440_p1	108979951	Q9C9C4	VIT_17s0000g04540	Enolase 1, chloroplastic	52298	1.62192e+07	1.87379e+07	1.70724e+07	1.38998e+07	1.26546e+07	1.2804e+07	1.73431e+07	1.31195e+07	1.32194	0.402655	up	0.00100003	0.00247242	high
Jr09_10590_p1	108997481	Q9CAK8	VIT_02s0025g00380	2-C-methyl-D-erythritol 2,4-cyclodiphosphate synthase, chloroplastic (MECDP-synthase; MECPS; MECS)	24204	260523	251731	201724	193195	154100	192841	237993	180046	1.32185	0.402555	up	0.0495729	0.0822306	low
Jr07_26590_p1	109013065	Q9LDV4	VIT_09s0002g00340	Alanine aminotransferase 2, mitochondrial (AtAlaAT2; AtAlaATm)	58999	6.95087e+06	7.47084e+06	7.30341e+06	5.18383e+06	5.52153e+06	5.75238e+06	7.24171e+06	5.48591e+06	1.32006	0.400598	up	0.000520099	0.00138023	high
Jr08_00640_p1	#N/A	Q9C5Z1	VIT_04s0008g07070	Eukaryotic translation initiation factor 3 subunit B (eIF3b)	82528	1.73353e+06	1.67446e+06	1.96798e+06	1.40296e+06	1.50508e+06	1.16457e+06	1.79199e+06	1.35754e+06	1.32003	0.40057	up	0.0108111	0.0211725	med
Jr13_10320_p1	108999786	B3LF48	VIT_18s0122g01080	EH domain-containing protein 2 (AtEHD2)	60294	78779.8	89136.9	70249.6	67321.5	55277.9	57906.3	79388.8	60168.6	1.31944	0.399924	up	0.0659027	0.105371	no
Jr07_25590_p1	109009133	Q96254	VIT_05s0094g01550	Guanosine nucleotide diphosphate dissociation inhibitor 1 (AtGDI1)	49860	2.0599e+06	2.0412e+06	2.52701e+06	1.4966e+06	1.90063e+06	1.62923e+06	2.20937e+06	1.67549e+06	1.31864	0.399055	up	0.0131057	0.0253203	med
Jr01_20870_p1	109004364	Q9SKU1	VIT_00s0370g00020	Clathrin light chain 1	39992	206012	333838	200458	220370	171534	169669	246769	187191	1.31828	0.398652	up	0.130237	0.187696	no
Jr09_16520_p1	108994741	Q9FG71	VIT_19s0015g00910	ER membrane protein complex subunit 8/9 homolog	22961	4.07267e+06	4.46995e+06	5.34723e+06	3.55197e+06	3.52857e+06	3.45655e+06	4.62995e+06	3.51237e+06	1.31819	0.398553	up	0.00450614	0.00970734	high
Jr04_22200_p1	109005162	O82662	VIT_08s0007g04000	Succinate--CoA ligase [ADP-forming] subunit beta, mitochondrial	17262	52487.5	119096	80622.5	62001.6	73507.9	55823.9	84068.6	63777.8	1.31815	0.398511	up	0.223274	0.298181	no
Jr14_19850_p1 (+1)	108998717	P40941	VIT_06s0004g01910	ADP,ATP carrier protein 2, mitochondrial	41986	477525	484926	602873	418520	446458	323234	521775	396070	1.31738	0.397671	up	0.042841	0.0724124	low
Jr16_02870_p1	109012460	Q9LZV3	VIT_18s0001g05030	Mannan endo-1,4-beta-mannosidase 6	56427	347710	445411	467477	386917	293912	276150	420199	318993	1.31727	0.397549	up	0.0611285	0.0986194	low
Jr11_12700_p1	109003352	Q9LE82	VIT_07s0104g00520	RAN GTPase-activating protein 1 (AtRanGAP1; RanGAP1)	65118	2.03306e+06	2.13413e+06	2.2057e+06	1.52515e+06	1.63894e+06	1.67553e+06	2.1243e+06	1.61321e+06	1.31682	0.397055	up	0.00179446	0.00420663	high
Jr09_07940_p1	109014293	O82291	VIT_02s0012g02050	Probable plastid-lipid-associated protein 3, chloroplastic (AtPap3)	39090	1.75319e+07	1.59024e+07	1.21374e+07	1.13767e+07	1.14527e+07	1.18149e+07	1.51905e+07	1.15481e+07	1.31541	0.395516	up	0.0132966	0.0256591	med
Jr14_14330_p1	108990325	Q9LZF6	VIT_08s0040g01480	Cell division control protein 48 homolog E (AtCDC48e)	91169	282379	302482	294998	198651	261272	209569	293286	223164	1.31422	0.394204	up	0.035394	0.0610139	low
Jr04_06130_p1	108992575	Q9SG80	VIT_08s0040g00320	Alpha-L-arabinofuranosidase 1 (AtASD1)	74507	4.77024e+06	5.39737e+06	4.76643e+06	4.36218e+06	3.76447e+06	3.23985e+06	4.97801e+06	3.78883e+06	1.31386	0.393816	up	0.00850071	0.0170691	med
Jr03_20810_p1 (+1)	109003782	O50008	VIT_08s0056g01570	5-methyltetrahydropteroyltriglutamate--homocysteine methyltransferase 1	84609	1.67411e+07	2.21075e+07	2.48971e+07	1.67781e+07	1.75235e+07	1.4242e+07	2.12486e+07	1.61812e+07	1.31317	0.393049	up	0.0276532	0.0491877	med
Jr06_13930_p1	109005615	Q84M92	VIT_17s0000g04010	Actin-related protein 4	48989	154518	158959	165933	112622	132272	120225	159803	121706	1.31302	0.392893	up	0.0359819	0.0617852	low
Jr07_25410_p1	109009305	Q8LAC4	VIT_05s0094g01420	Probable uridine nucleosidase 2	34240	1.21427e+06	1.14088e+06	1.21739e+06	750759	936512	1.03628e+06	1.19085e+06	907852	1.31172	0.391459	up	0.0180927	0.0338251	med
Jr07_28010_p1	109002018	Q5M729	VIT_09s0002g01800	Dihydrolipoyllysine-residue acetyltransferase component 3 of pyruvate dehydrogenase complex, mitochondrial	60101	2.45253e+07	2.81943e+07	2.35323e+07	2.00007e+07	1.8739e+07	1.94169e+07	2.54173e+07	1.93855e+07	1.31115	0.39083	up	0.00198288	0.00459281	high
Jr16_03490_p1	108992165	Q6IDL4	VIT_12s0034g01440	Transmembrane emp24 domain-containing protein p24delta3	25075	390484	540189	439327	299327	377787	367910	456667	348341	1.31097	0.390639	up	0.0471659	0.0785542	low
Jr08_09870_p1	109022227	Q9FNL2	VIT_18s0122g01020	Pentatricopeptide repeat-containing protein At5g46100	24661	6.17304e+06	6.45233e+06	6.05344e+06	4.65614e+06	4.77092e+06	4.82599e+06	6.22627e+06	4.75102e+06	1.31051	0.390131	up	0.000440416	0.00118113	high
Jr15_02130_p1 (+1)	108980090	Q9LPL6	VIT_18s0001g01180	TOM1-like protein 3	55987	925535	813538	994129	562543	761460	761660	911067	695221	1.31047	0.390085	up	0.0315084	0.0551815	low
Jr01_07040_p1	109002750	Q93ZC5	VIT_14s0083g00110	Allene oxide cyclase 4, chloroplastic	30568	667766	657994	791591	513186	583118	519571	705784	538625	1.31034	0.389945	up	0.01364	0.0262909	med
Jr02_08490_p1	109011254	Q9LTV6	VIT_19s0085g00500	Peroxisomal 2,4-dienoyl-CoA reductase	31728	4.59323e+06	4.39683e+06	4.21482e+06	3.14321e+06	3.38123e+06	3.55827e+06	4.40162e+06	3.3609e+06	1.30966	0.389187	up	0.00120634	0.00293655	high
Jr12_08760_p1	109011702	Q93WN0	VIT_05s0029g00240	Selenium-binding protein 2	54216	2.90759e+07	2.95851e+07	2.71194e+07	2.40645e+07	2.15193e+07	1.99173e+07	2.85934e+07	2.18337e+07	1.3096	0.389126	up	0.00242035	0.0055017	high
Jr14_00630_p1	109001538	P82658	VIT_13s0064g01080	Thylakoid lumenal 19 kDa protein, chloroplastic	26320	1.41818e+07	1.24041e+07	1.3347e+07	9.70515e+06	9.75773e+06	1.10633e+07	1.3311e+07	1.01754e+07	1.30815	0.38753	up	0.00193414	0.00448622	high
Jr13_04370_p1	109007678	Q9FNX8	VIT_12s0178g00050	Lipoxygenase 4, chloroplastic (AtLOX4)	31301	180802	180460	191748	108588	146712	167548	184337	140950	1.30782	0.387163	up	0.0820002	0.127008	no
Jr11_20250_p1	108991368	Q04088	VIT_03s0038g00860	Probable transcription factor PosF21	63504	280933	239624	311486	142927	243821	250273	277348	212340	1.30615	0.385316	up	0.14227	0.202733	no
Jr12_09700_p1 (+1)	109013045	O80719	VIT_05s0020g00720	Probable receptor-like protein kinase At2g47060	38887	401408	737102	341513	613909	270785	248670	493341	377788	1.30587	0.385008	up	0.373155	0.459611	no
Jr01_22610_p1	108981803	Q96299	VIT_19s0014g01420	14-3-3-like protein GF14 mu	29364	1.67316e+07	1.93987e+07	1.68156e+07	1.31114e+07	1.3757e+07	1.36934e+07	1.76486e+07	1.35206e+07	1.30531	0.384396	up	0.0016481	0.00390241	high
Jr10_25930_p1	109000747	Q9SY97	VIT_15s0024g00040	Photosystem I chlorophyll a/b-binding protein 3-1, chloroplastic (Lhca3*1)	29721	1.90757e+07	1.31968e+07	1.37609e+07	1.10223e+07	1.00753e+07	1.41709e+07	1.53445e+07	1.17562e+07	1.30523	0.384301	up	0.055439	0.0906833	low
Jr10_23140_p1	#N/A	Q8L6Y1	VIT_11s0118g00510	Ubiquitin carboxyl-terminal hydrolase 14	60580	339013	242717	327510	140690	261451	294677	303080	232273	1.30485	0.38388	up	0.20988	0.283045	no
Jr14_00490_p1	#N/A	Q9SI54	VIT_13s0064g01230	Sm-like protein LSM7 (AtLSM7)	10819	1.9415e+06	1.60247e+06	1.55895e+06	913818	1.27309e+06	1.72417e+06	1.70097e+06	1.30369e+06	1.30473	0.383757	up	0.11372	0.167331	no
Jr04_08650_p1	108985048	Q9LML6	VIT_06s0004g06390	Flavonol 3-O-glucosyltransferase UGT71C4	54994	63664.2	69377.9	72712.1	45387.2	63811.3	48587.7	68584.7	52595.4	1.30401	0.38295	up	0.0960984	0.145028	no
Jr04_15400_p1	108985032	Q9FPR3	VIT_01s0011g01490	Serine/threonine-protein kinase EDR1	146212	66067.2	81568.3	82041.4	63682.5	61693.3	50758.2	76559	58711.4	1.30399	0.38293	up	0.084284	0.129874	no
Jr13_03490_p1	108983913	Q9FLQ7	VIT_03s0038g01340	Formin-like protein 20 (AtFH20)	18336	281478	211258	253168	186873	176793	208376	248635	190681	1.30393	0.38287	up	0.0515589	0.0850257	low
Jr14_18150_p1	109000610	Q05728	VIT_07s0005g01170	Phosphoribosylformylglycinamidine cyclo-ligase, chloroplastic	42918	130134	191131	199871	107719	146396	145773	173712	133296	1.3032	0.382063	up	0.127061	0.183682	no
Jr14_08540_p1	108996898	P0C895	VIT_06s0004g07050	LRR repeats and ubiquitin-like domain-containing protein At2g30105	41908	66528	86283.5	63921.5	55259.5	58288.5	52775.7	72244.3	55441.2	1.30308	0.381923	up	0.0863687	0.132529	no
Jr10_05960_p1	109007806	Q8LE52	VIT_14s0006g00630	Glutathione S-transferase DHAR3, chloroplastic	30992	1.15195e+07	1.13969e+07	1.00223e+07	8.2185e+06	7.41306e+06	9.65106e+06	1.09795e+07	8.42754e+06	1.30282	0.381635	up	0.00825823	0.0166376	med
Jr12_19520_p1	109011016	Q9C969	VIT_09s0002g05250	Aromatic aminotransferase ISS1	43593	194154	174825	241565	101172	210303	157327	203515	156267	1.30235	0.381117	up	0.204771	0.277748	no
Jr02_14470_p1 (+2)	109001093	Q9C865	VIT_02s0087g00190	SH3 domain-containing protein 1	41747	20945.6	31914.3	28129.8	17002.6	23503.4	21699.5	26996.5	20735.2	1.30197	0.380688	up	0.150983	0.213947	no
Jr01_13900_p1	108996352	P57681	VIT_07s0031g02490	Farnesylcysteine lyase	59092	228265	161801	223203	166812	152196	152184	204423	157064	1.30153	0.380209	up	0.071762	0.113244	no
Jr08_00060_p1 (+2)	109000954	Q93YW5	VIT_09s0070g00490	Probable protein phosphatase 2C 58 (AtPP2C58)	32281	1.49405e+06	1.37028e+06	1.50875e+06	1.14442e+06	1.09135e+06	1.12602e+06	1.45769e+06	1.1206e+06	1.30082	0.379419	up	0.00390376	0.00848173	high
Jr07_18380_p1	108987296	Q93ZE5	VIT_05s0077g02040	Probable acylpyruvase FAHD1, mitochondrial	23978	6.49505e+06	6.15005e+06	6.65953e+06	4.18966e+06	4.22408e+06	6.42724e+06	6.43488e+06	4.947e+06	1.30076	0.37936	up	0.046372	0.0773493	low
Jr12_14780_p1	108986156	O23300	VIT_05s0049g00180	Enoyl-CoA delta isomerase 3	32462	4.96116e+06	5.32471e+06	4.58502e+06	4.24403e+06	3.69347e+06	3.51067e+06	4.95696e+06	3.81606e+06	1.29898	0.377374	up	0.00466069	0.00999456	high
Jr04_08520_p1	108985035	Q9C5X8	VIT_01s0011g01110	Molybdenum cofactor sulfurase (MCS; MOS; MoCo sulfurase)	33831	298509	272508	327201	253294	224815	214362	299406	230824	1.29712	0.375313	up	0.0362882	0.0621975	low
Jr09_11890_p1	108990861	O64644	VIT_15s0048g01290	Histone deacetylase complex subunit SAP18	19589	1.53091e+06	1.38427e+06	1.38973e+06	1.01828e+06	1.03058e+06	1.27285e+06	1.43497e+06	1.10723e+06	1.296	0.37406	up	0.0147354	0.0282043	med
Jr11_25610_p1	108979682	O65570	VIT_11s0052g00670	Villin-4	105910	123030	112016	110600	86605.8	107657	72647.7	115216	88970.3	1.29499	0.37294	up	0.0994537	0.149236	no
Jr14_15530_p1	109014011	O23305	VIT_06s0009g01670	FHA domain-containing protein At4g14490	24250	1.79051e+07	1.62112e+07	1.57935e+07	1.14945e+07	1.26692e+07	1.43792e+07	1.66366e+07	1.28476e+07	1.29492	0.372862	up	0.00608644	0.0126888	med
Jr13_01400_p1	108996191	Q9C6D2	VIT_03s0091g00080	Methylthioribose kinase (AtMTK; MTR kinase)	47756	3.84874e+06	3.49435e+06	3.93613e+06	2.55677e+06	3.48388e+06	2.67052e+06	3.75974e+06	2.90372e+06	1.2948	0.372728	up	0.0191466	0.0355334	med
Jr01_19300_p1	109020391	Q9LTT8	VIT_04s0008g05590	Enhancer of mRNA-decapping protein 4	23752	1.28565e+07	7.99824e+06	1.12088e+07	5.50128e+06	6.639e+06	1.26296e+07	1.06879e+07	8.25661e+06	1.29446	0.372352	up	0.259569	0.338693	no
Jr12_00300_p1	108988544	Q9FJX3	VIT_07s0129g00170	Mitochondrial outer membrane protein porin 2	32561	2.15971e+06	2.20549e+06	2.37875e+06	1.54488e+06	1.76549e+06	1.90288e+06	2.24798e+06	1.73775e+06	1.29362	0.371409	up	0.0080882	0.016335	med
Jr16_00190_p1	109004510	Q9LR75	VIT_03s0017g02330	Coproporphyrinogen-III oxidase 1, chloroplastic (AtCPO-I; Coprogen oxidase; Coproporphyrinogenase)	46591	1.48569e+07	1.52137e+07	1.52761e+07	1.15019e+07	1.17194e+07	1.18723e+07	1.51155e+07	1.16979e+07	1.29216	0.369786	up	0.000760082	0.00194053	high
Jr09_04610_p1	108983964	Q93V93	VIT_17s0000g01740	Peroxidase 44 (Atperox P44)	54040	5.90936e+06	5.94414e+06	6.34516e+06	4.72478e+06	4.7611e+06	4.62077e+06	6.06622e+06	4.70222e+06	1.29008	0.367455	up	0.00100067	0.00247242	high
Jr16_18500_p1	108981316	F4IDQ5	VIT_03s0063g01360	Protein JASON	55714	951690	982869	960443	695031	820480	730372	965001	748627	1.28903	0.366282	up	0.010526	0.0206633	med
Jr03_14660_p1	109021380	Q9LS06	VIT_10s0003g03260	AP2/ERF and B3 domain-containing transcription factor ARF14	17164	2.00629e+06	2.19063e+06	2.2679e+06	1.58693e+06	1.62813e+06	1.80086e+06	2.15494e+06	1.67198e+06	1.28886	0.366093	up	0.00607036	0.0126632	med
Jr01_21140_p1	108999571	Q9LUQ5	VIT_12s0028g03630	Probable ubiquitin-conjugating enzyme E2 25	59861	162139	223329	163263	140433	159526	125887	182910	141949	1.28856	0.365762	up	0.0997225	0.149363	no
Jr14_09930_p1	108998470	Q8RXD4	VIT_06s0004g05880	Protein BREAST CANCER SUSCEPTIBILITY 1 homolog (AtBRCA1)	158986	208394	176232	227580	91415.9	200168	184077	204069	158554	1.28707	0.364085	up	0.249682	0.327646	no
Jr01_21480_p1 (+1)	108986641	Q93YW5	VIT_12s0028g03310	Probable protein phosphatase 2C 58 (AtPP2C58)	35077	1.64262e+06	2.077e+06	1.48512e+06	1.45364e+06	1.34304e+06	1.25085e+06	1.73491e+06	1.34918e+06	1.28591	0.362785	up	0.0330839	0.0576649	low
Jr14_20770_p1	109001618	Q940Q1	VIT_06s0004g01360	Probable pectate lyase 1	71746	22315.3	17290.3	24975.1	15079	20733.1	14412.3	21526.9	16741.5	1.28585	0.362717	up	0.175956	0.24378	no
Jr01_26800_p1	109009725	P0C2C9	VIT_11s0016g02300	F-box only protein 12	54604	1.34005e+06	1.43968e+06	1.35142e+06	1.2192e+06	1.05296e+06	942226	1.37705e+06	1.07146e+06	1.2852	0.361996	up	0.0176048	0.0330253	med
Jr01_13580_p1	108996282	Q9LF97	VIT_07s0031g02750	CBS domain-containing protein CBSCBSPB3	58005	221351	219100	188943	207278	152371	130117	209798	163256	1.28509	0.361868	up	0.120028	0.174997	no
Jr10_11820_p1	108987596	Q9SIE1	VIT_07s0031g00980	Bifunctional aspartate aminotransferase and glutamate/aspartate-prephenate aminotransferase (AtAAT; AtPPA-AT)	52110	90601.1	84389.3	88614	39069.6	81095.9	85201.7	87868.1	68455.7	1.28358	0.360169	up	0.261546	0.341003	no
Jr07_17740_p1	109005478	Q9M1B9	VIT_05s0102g00710	Probable fructokinase-4	39138	2.39401e+07	2.15953e+07	2.36961e+07	1.75023e+07	1.81506e+07	1.82899e+07	2.30772e+07	1.79809e+07	1.28342	0.359999	up	0.00193063	0.0044844	high
Jr01_18800_p1 (+1)	109014304	Q8H107	VIT_10s0116g01480	Dihydrolipoyllysine-residue succinyltransferase component of 2-oxoglutarate dehydrogenase complex 2, mitochondrial	51660	1.93334e+07	1.93273e+07	2.07614e+07	1.4146e+07	1.54996e+07	1.67027e+07	1.98074e+07	1.54494e+07	1.28208	0.358485	up	0.00369949	0.00806983	high
Jr14_10100_p1	109014708	P13853	VIT_13s0019g03170	17.6 kDa class I heat shock protein 3	18024	112638	136839	84490.4	101974	109898	48687.5	111322	86853.3	1.28173	0.358092	up	0.313143	0.396512	no
Jr05_06000_p1	108986800	F4KEV7	VIT_06s0004g08410	Bifunctional bis(5'-adenosyl)-triphosphatase/adenylylsulfatase FHIT	14645	1.60788e+06	1.83789e+06	2.20934e+06	1.66249e+06	1.38375e+06	1.36715e+06	1.88504e+06	1.47113e+06	1.28135	0.357666	up	0.0371173	0.0634536	low
Jr12_19890_p1	#N/A	Q56XG6	VIT_09s0002g06660	DEAD-box ATP-dependent RNA helicase 15	48265	78903.4	74331.1	64460.9	64048.6	54229.9	51618.8	72565.1	56632.4	1.28134	0.357648	up	0.0998141	0.149404	no
Jr13_10080_p1	109019134	P19171	VIT_03s0038g03400	Basic endochitinase B	34395	382738	622657	341594	217890	382177	451347	448996	350472	1.28112	0.357406	up	0.289194	0.371322	no
Jr14_20210_p1	109002100	Q9SZ83	VIT_06s0004g01540	Uncharacterized oxidoreductase At4g09670	39169	185930	165128	294741	169545	195985	139632	215266	168387	1.2784	0.354341	up	0.202627	0.275292	no
Jr09_06400_p1	109021694	Q9SRQ3	VIT_02s0154g00610	Peroxisome biogenesis protein 19-1	27868	1.34935e+06	1.43481e+06	1.41733e+06	977128	1.17044e+06	1.1398e+06	1.4005e+06	1.09579e+06	1.27807	0.353968	up	0.012646	0.0245184	med
Jr10_08290_p1 (+1)	109007629	Q9LTK0	VIT_16s0100g01230	Protein phosphatase inhibitor 2 (AtI-2; IPP-2)	20649	508966	600327	422411	481783	358640	358264	510568	399562	1.27782	0.353683	up	0.09309	0.141004	no
Jr07_14550_p1	109008441	Q9SVM8	VIT_05s0029g00440	Glycine-rich RNA-binding protein 2, mitochondrial (AtGR-RBP2)	17407	817620	836237	958892	682033	669406	696481	870916	682640	1.27581	0.351409	up	0.0153463	0.0291916	med
Jr16_20800_p1 (+1)	108995716	Q8S944	VIT_03s0038g00970	Dynamin-related protein 3A	91522	355083	376506	351959	297894	308800	243272	361183	283322	1.27481	0.350287	up	0.0462495	0.0772231	low
Jr07_30400_p1	109009761	Q9C829	VIT_09s0002g04830	Nuclear pore complex protein NUP50A	43567	433445	473058	427646	424650	311448	310554	444716	348884	1.27468	0.350137	up	0.0657683	0.105229	no
Jr13_19110_p1	109006446	Q94JZ8	VIT_01s0010g02050	Plant UBX domain-containing protein 7 (PUX7)	50914	176568	196625	193036	127652	160192	156767	188743	148204	1.27354	0.348843	up	0.0719841	0.113476	no
Jr03_23980_p1	108979936	B9DHT4	VIT_08s0007g00740	ARM REPEAT PROTEIN INTERACTING WITH ABF2 (ARIA)	50367	2.6624e+06	2.61583e+06	3.15037e+06	2.00254e+06	2.26154e+06	2.35563e+06	2.80953e+06	2.20657e+06	1.27326	0.348526	up	0.0149365	0.028523	med
Jr08_21540_p1	109006828	Q9LHA8	VIT_08s0007g00130	Probable mediator of RNA polymerase II transcription subunit 37c	95680	65588.2	131603	70068.4	99066.7	55303.8	55640.1	89086.4	70003.5	1.2726	0.347777	up	0.353241	0.438643	no
Jr16_15580_p1	109006655	B3LF48	VIT_03s0038g03870	EH domain-containing protein 2 (AtEHD2)	109988	440585	470789	385346	306705	372867	340292	432240	339955	1.27146	0.34649	up	0.0456207	0.0763278	low
Jr08_09840_p1 (+1)	109022236	Q9STX2	VIT_18s0122g01060	3-oxo-Delta(4,5)-steroid 5-beta-reductase	24542	429626	451850	512712	329290	389071	378553	464729	365638	1.27101	0.345974	up	0.0387696	0.0660385	low
Jr07_37590_p1	108991871	Q58FX0	VIT_06s0004g06150	BON1-associated protein 2	34784	770096	814689	801854	639361	602257	636836	795547	626152	1.27053	0.345434	up	0.0123169	0.0239226	med
Jr07_00710_p1	109009361	Q9FJX3	VIT_07s0129g00170	Mitochondrial outer membrane protein porin 2	29236	4.32818e+07	4.58056e+07	4.52528e+07	3.67845e+07	3.30006e+07	3.59695e+07	4.47801e+07	3.52515e+07	1.2703	0.34517	up	0.00365659	0.00799213	high
Jr16_15200_p1	109006689	Q9FIJ4	VIT_01s0150g00610	DNA repair RAD52-like protein 2, chloroplastic	25378	147518	117793	152513	72302.9	127159	129463	139275	109642	1.27027	0.345138	up	0.220827	0.295392	no
Jr02_21990_p1	109013172	Q9T076	VIT_12s0028g03450	Early nodulin-like protein 2	28138	2.56377e+06	3.36163e+06	3.61357e+06	2.61003e+06	2.53176e+06	2.37207e+06	3.17966e+06	2.50462e+06	1.26952	0.344279	up	0.0337041	0.0585911	low
Jr12_08940_p1	108992747	Q9SVN5	VIT_05s0029g01200	Methionine--tRNA ligase, cytoplasmic	91227	714066	799467	943255	640255	728121	568418	818929	645598	1.26848	0.343102	up	0.0530842	0.0873082	low
Jr10_20030_p1 (+1)	109002835	O23247	VIT_11s0016g02990	Arginine--tRNA ligase, chloroplastic/mitochondrial	66530	153075	133846	143321	120673	120005	98608.2	143414	113096	1.26808	0.342648	up	0.0854518	0.131378	no
Jr03_23740_p1 (+3)	108999014	Q9M354	VIT_08s0007g00010	Probable ADP-ribosylation factor GTPase-activating protein AGD6 (ARF GAP AGD6)	49481	423205	473101	442278	357030	361709	337407	446195	352049	1.26742	0.341898	up	0.0273051	0.0486474	med
Jr01_07880_p1	108988141	Q9LF46	VIT_14s0006g02240	2-hydroxyacyl-CoA lyase	61228	4.78739e+07	5.50939e+07	4.71378e+07	4.22137e+07	3.83818e+07	3.7895e+07	5.00352e+07	3.94968e+07	1.26682	0.341207	up	0.00850347	0.0170691	med
Jr14_15540_p1	109014012	Q9ZNT1	VIT_06s0009g01710	NADH--cytochrome b5 reductase 1	31171	151470	151745	132943	123129	107724	113670	145386	114841	1.26598	0.34025	up	0.0759014	0.119016	no
Jr16_15790_p1	109006637	F4KI56	VIT_03s0038g03640	Metal-independent phosphoserine phosphatase (iPSP)	26028	82433.1	80588	79823.1	48439.9	64932.9	78519.9	80948.1	63964.2	1.26552	0.33973	up	0.163499	0.228926	no
Jr10_01350_p1 (+1)	108998848	Q9LZ82	VIT_18s0001g05630	Protein BTR1	81395	406932	478774	369900	432238	282885	277078	418535	330734	1.26548	0.339679	up	0.145156	0.206578	no
Jr03_12080_p1	108981915	Q56X52	VIT_00s0399g00060	Ubiquinol oxidase 4, chloroplastic/chromoplastic	40593	310185	523816	322452	534783	202744	178022	385484	305183	1.26313	0.336997	up	0.454232	0.542642	no
Jr15_09560_p1_family	#N/A	Q38950	VIT_17s0000g03870	Serine/threonine-protein phosphatase 2A 65 kDa regulatory subunit A beta isoform (AtA beta; PP2A, subunit A, beta isoform)	65610	3.36806e+06	3.55584e+06	3.59531e+06	2.88644e+06	2.88651e+06	2.56489e+06	3.5064e+06	2.77928e+06	1.26162	0.33528	up	0.00640786	0.0133083	med
Jr04_18580_p1	109015827	Q9MA15	VIT_08s0007g08990	Protein ACTIVITY OF BC1 COMPLEX KINASE 3, chloroplastic (ABC1-LIKE KINASE 3)	11946	1.78209e+06	1.5499e+06	1.8483e+06	966448	1.47077e+06	1.67123e+06	1.72677e+06	1.36948e+06	1.26089	0.334443	up	0.128613	0.185599	no
Jr07_19280_p1	108995027	Q8VYW2	VIT_05s0020g01910	Inactive beta-amylase 9	59041	187747	196335	174646	139916	146140	157068	186243	147708	1.26088	0.334436	up	0.0659211	0.105371	no
Jr13_13950_p1 (+1)	109022048	Q9CAZ0	VIT_17s0000g04820	F-box protein SKIP24	32611	401427	405315	378629	267951	340018	332174	395124	313381	1.26084	0.334388	up	0.0544479	0.0891949	low
Jr11_27550_p1	109009538	Q0WPU1	VIT_04s0008g02720	Myosin-15	51503	509090	609038	581900	442205	480554	425774	566676	449511	1.26065	0.334168	up	0.0347812	0.0602094	low
Jr07_19980_p1	108995001	Q9C5J7	VIT_05s0020g02540	ATP-dependent 6-phosphofructokinase 7 (ATP-PFK 7; Phosphofructokinase 7)	25896	8.02341e+06	8.6248e+06	5.56492e+06	5.72045e+06	6.34162e+06	5.56264e+06	7.40437e+06	5.8749e+06	1.26034	0.333812	up	0.0689156	0.109257	no
Jr01_07180_p1 (+3)	108979573	Q9FN03	VIT_14s0006g03240	Ultraviolet-B receptor UVR8	46279	2.11126e+06	2.13445e+06	2.27875e+06	1.75459e+06	1.68129e+06	1.74727e+06	2.17482e+06	1.72772e+06	1.25878	0.332031	up	0.00727541	0.014885	med
Jr02_13500_p1 (+1)	108998102	Q43307	VIT_02s0012g02160	Glycerol-3-phosphate acyltransferase, chloroplastic (GPAT)	51350	1.15797e+06	864386	1.15803e+06	687423	944798	894535	1.06013e+06	842252	1.25868	0.331917	up	0.0903049	0.137544	no
Jr01_05310_p1 (+1)	108982495	B0F9L4	VIT_13s0139g00160	Golgin candidate 6 (AtGC6)	101079	6520.77	4532.54	7488.35	4509.74	5887.94	4341.55	6180.55	4913.08	1.25798	0.331106	up	0.24776	0.325605	no
Jr04_17450_p1	109009718	F4JUI9	VIT_08s0056g00770	Kinesin-like protein KIN-7F	61325	68979.2	79913.2	61868	71386.6	48010.5	48198	70253.5	55865	1.25756	0.330623	up	0.194539	0.265948	no
Jr07_02030_p1	108983930	Q8LDU4	VIT_07s0031g00680	Red chlorophyll catabolite reductase, chloroplastic (AtRCCR; RCC reductase)	36188	1.31059e+06	1.36275e+06	1.07218e+06	1.04542e+06	948438	985757	1.24851e+06	993204	1.25705	0.330044	up	0.0318911	0.0557053	low
Jr01_24070_p1	108993579	Q94A32	VIT_07s0130g00480	Protein FATTY ACID EXPORT 2, chloroplastic (At-FAX2)	24482	140332	125204	135844	112116	108151	99313.4	133793	106527	1.25596	0.328788	up	0.0845866	0.130218	no
Jr14_16980_p1	108985848	Q9ZNT0	VIT_06s0080g00160	Protein SUPPRESSOR OF K(+) TRANSPORT GROInfH DEFECT 1 (AtSKD1)	48375	981100	954674	903429	754278	788798	718403	946401	753826	1.25546	0.328219	up	0.0175706	0.0329799	med
Jr11_07270_p1 (+1)	#N/A	Q9FInf2	VIT_04s0023g02620	Probable ubiquitin-conjugating enzyme E2 16	18396	271538	280713	287492	170260	239799	258853	279914	222970	1.25539	0.328132	up	0.123076	0.178941	no
Jr03_26580_p1	108985281	O80910	VIT_08s0058g00880	TOM1-like protein 6	84894	914368	1.03167e+06	786024	741878	752415	686107	910688	726800	1.25301	0.325398	up	0.0423573	0.0716314	low
Jr09_00040_p1	109009719	Q8VZG7	VIT_00s0283g00020	Ribonuclease TUDOR 1 (AtTudor1; TUDOR-SN protein 1)	108892	1.17374e+06	1.11395e+06	1.1198e+06	828431	985282	912489	1.13583e+06	908734	1.2499	0.321816	up	0.0232069	0.0421897	med
Jr07_37620_p1	108991816	O24412	VIT_02s0025g01490	26S proteasome non-ATPase regulatory subunit 7 homolog A	34788	1.15464e+07	1.28087e+07	1.24373e+07	1.023e+07	9.16815e+06	1.00424e+07	1.22641e+07	9.81353e+06	1.24972	0.3216	up	0.00683975	0.0140548	med
Jr11_21070_p1	108991381	P51102	VIT_18s0001g12800	Dihydroflavonol 4-reductase (DFR)	37947	6.34377e+06	7.04465e+06	9.31368e+06	7.06696e+06	6.094e+06	5.01105e+06	7.56737e+06	6.05734e+06	1.24929	0.321107	up	0.10156	0.151419	no
Jr02_21590_p1	109012856	Q8L493	VIT_19s0014g02170	D-amino-acid transaminase, chloroplastic	38058	562561	718190	607027	551842	461068	498404	629259	503771	1.2491	0.320885	up	0.0580307	0.0945006	low
Jr13_06080_p1 (+2)	109002343	Q0WW84	VIT_03s0063g00850	Polyadenylate-binding protein RBP47B (Poly(A)-binding protein RBP47B)	49376	269211	244905	294339	207441	225831	214053	269485	215775	1.24892	0.320677	up	0.0678747	0.108063	no
Jr15_04080_p1	108990338	Q9C500	VIT_18s0001g09670	WPP domain-containing protein 2	17765	2.59004e+06	2.61879e+06	2.71594e+06	2.03706e+06	2.06562e+06	2.2427e+06	2.64159e+06	2.11512e+06	1.24891	0.320665	up	0.00896548	0.0178343	med
Jr13_28780_p1_family	109007847	Q9C5A9	VIT_17s0000g02900	ATP synthase subunit beta-3, mitochondrial	59925	2.25079e+08	2.43521e+08	2.50186e+08	1.96761e+08	1.89308e+08	1.89841e+08	2.39595e+08	1.9197e+08	1.24809	0.319719	up	0.00863191	0.0173058	med
Jr12_15470_p1	109005080	Q8W108	VIT_05s0020g04080	1,2-dihydroxy-3-keto-5-methylthiopentene dioxygenase 3	28380	102028	238424	271571	92192.9	204740	193484	204008	163472	1.24796	0.319575	up	0.465382	0.553554	no
Jr09_03640_p1 (+2)	109021989	Q9SB63	VIT_17s0000g08810	Protein MODIFIER OF SNC1 1	175379	297350	297495	269178	212531	249739	230928	288008	231066	1.24643	0.317802	up	0.0665869	0.106313	no
Jr09_07170_p1	109004233	Q9FMN4	VIT_13s0064g01450	Thioredoxin-like protein Clot	14878	1.42242e+07	1.43035e+07	1.5651e+07	1.22284e+07	1.10931e+07	1.21456e+07	1.47262e+07	1.18224e+07	1.24562	0.316868	up	0.00754762	0.0153656	med
Jr04_02210_p1 (+1)	109014998	Q8VYN9	VIT_05s0077g01070	Universal stress protein PHOS32	17862	1.81028e+07	1.8864e+07	1.61631e+07	1.47805e+07	1.29045e+07	1.49767e+07	1.771e+07	1.42206e+07	1.24538	0.316582	up	0.0148674	0.0284074	med
Jr08_17870_p1	109010121	Q9SZU7	VIT_04s0023g02610	Probable esterase KAI2	39838	890394	1.03207e+06	1.18844e+06	827479	958780	713415	1.03697e+06	833225	1.24452	0.315595	up	0.0841056	0.129659	no
Jr06_00870_p1 (+3)	108991521	Q94AG2	VIT_07s0031g01410	Somatic embryogenesis receptor kinase 1 (AtSERK1)	68530	70271.2	94842	60102.1	54262.9	68458.1	58432	75071.8	60384.3	1.24323	0.314095	up	0.214044	0.288072	no
Jr08_21200_p1	109009750	O04023	VIT_14s0060g02390	Protein SRC2 homolog (AtSRC2)	29565	3.74513e+06	4.13289e+06	4.09439e+06	3.21971e+06	3.0383e+06	3.38401e+06	3.9908e+06	3.214e+06	1.24169	0.312307	up	0.010022	0.0197327	med
Jr11_13080_p1	109010923	Q940V3	VIT_07s0104g00420	UDP-glycosyltransferase 91A1	30349	1.79504e+06	1.84455e+06	2.08112e+06	1.64182e+06	1.45463e+06	1.51185e+06	1.9069e+06	1.5361e+06	1.24139	0.311958	up	0.0230268	0.0419548	med
Jr07_19510_p1	108995013	Q8LGE7	VIT_05s0020g02150	NADH dehydrogenase [ubiquinone] 1 alpha subcomplex subunit 8-B	11856	629308	518375	567910	316979	428359	637584	571864	460974	1.24056	0.310987	up	0.242425	0.319231	no
Jr04_10520_p1	109000707	O48946	VIT_10s0003g02610	Cellulose synthase A catalytic subunit 1 [UDP-forming] (AtCesA1)	37994	342744	431315	471884	281949	375789	347506	415314	335081	1.23944	0.309692	up	0.127502	0.184238	no
Jr04_02780_p1	109006805	O80934	VIT_08s0007g00530	Uncharacterized protein At2g37660, chloroplastic	36160	3.10708e+07	3.05053e+07	2.82756e+07	2.44802e+07	2.33572e+07	2.46689e+07	2.99505e+07	2.41688e+07	1.23923	0.309439	up	0.00776668	0.0157339	med
Jr05_14780_p1	109011331	Q39195	VIT_13s0064g00670	Photosystem II 5 kDa protein, chloroplastic (PSII-T)	11345	5.38722e+06	3.71662e+06	3.73718e+06	2.63718e+06	3.07987e+06	4.65927e+06	4.28034e+06	3.45877e+06	1.23753	0.307467	up	0.224339	0.29924	no
Jr07_34630_p1	108997102	P45724	VIT_13s0019g04460	Phenylalanine ammonia-lyase 2	77035	84401	149508	68976.3	173763	35157.3	35880.5	100962	81600.1	1.23727	0.307164	up	0.64009	0.716136	no
Jr14_00230_p1	109001504	Q9SN43	VIT_13s0156g00640	CBL-interacting serine/threonine-protein kinase 12	77169	49306.8	19769.3	41674.2	30780.6	27643.9	31099.6	36916.8	29841.4	1.2371	0.306964	up	0.38249	0.468589	no
Jr11_22490_p1	108982031	Q9SE96	VIT_18s0001g07130	GEM-like protein 1	32575	3.87614e+06	3.54639e+06	3.91563e+06	2.70313e+06	2.77349e+06	3.69604e+06	3.77938e+06	3.05755e+06	1.23608	0.305774	up	0.0563438	0.0920719	low
Jr16_12950_p1 (+1)	108989396	Q9LMX8	VIT_01s0011g00250	Probable 6-phosphogluconolactonase 1 (6PGL 1)	35242	63620.4	91033.7	71784.5	63043.8	61638.9	58642.1	75479.5	61108.3	1.23518	0.304716	up	0.177911	0.246103	no
Jr13_02340_p1	108983123	Q9C7Z9	VIT_03s0091g01270	Serine carboxypeptidase-like 18	54092	8.61849e+06	7.47121e+06	7.42039e+06	5.95697e+06	6.63758e+06	6.44401e+06	7.83669e+06	6.34619e+06	1.23487	0.304355	up	0.0150389	0.0286853	med
Jr08_16910_p1	108982478	O24616	VIT_03s0038g02300	Proteasome subunit alpha type-7-B	32381	8.56763e+06	8.72983e+06	8.7007e+06	6.90639e+06	6.92115e+06	7.23034e+06	8.66606e+06	7.01929e+06	1.23461	0.30405	up	0.00559534	0.0118117	med
Jr01_25150_p1	109009030	Q9SYG7	VIT_11s0016g00900	Aldehyde dehydrogenase family 7 member B4	54610	1.61779e+07	1.76111e+07	1.56364e+07	1.32331e+07	1.46655e+07	1.21718e+07	1.64751e+07	1.33568e+07	1.23346	0.302714	up	0.0190308	0.0353384	med
Jr13_24010_p1	108992271	P0C5K4	VIT_16s0098g01100	Putative formin-like protein 21a (AtFH21a)	11217	562532	541089	553344	405167	454606	484332	552322	448035	1.23277	0.301898	up	0.049783	0.0825376	low
Jr11_13590_p1	109007692	Q9LYC2	VIT_07s0104g01080	NPL4-like protein 1	46004	1.39563e+06	1.66073e+06	1.40626e+06	1.40024e+06	1.12476e+06	1.09517e+06	1.48754e+06	1.20673e+06	1.23271	0.301831	up	0.064635	0.103769	no
Jr16_14970_p1	109006717	Q9FND9	VIT_01s0150g00190	Probable galactinol--sucrose galactosyltransferase 5	47575	1.91187e+06	1.86645e+06	2.13713e+06	1.46163e+06	1.69735e+06	1.64025e+06	1.97182e+06	1.59974e+06	1.23258	0.301686	up	0.0293426	0.0519684	low
Jr10_07300_p1	108986447	Q42290	VIT_14s0108g01650	Probable mitochondrial-processing peptidase subunit beta, mitochondrial	58894	3.36061e+07	3.80781e+07	3.75302e+07	3.10153e+07	2.94398e+07	2.82175e+07	3.64048e+07	2.95576e+07	1.23166	0.300602	up	0.0140452	0.026993	med
Jr07_25500_p1	109009474	O80575	VIT_05s0094g01490	6,7-dimethyl-8-ribityllumazine synthase, chloroplastic (DMRL synthase; LS; Lumazine synthase)	24881	3.03679e+06	3.3342e+06	3.36328e+06	3.12709e+06	2.46161e+06	2.31953e+06	3.24476e+06	2.63608e+06	1.2309	0.299717	up	0.0538661	0.0884617	low
Jr04_00310_p1 (+1)	108990019	Q84JR9	VIT_11s0037g01020	TPR repeat-containing thioredoxin TTL4	30587	1.66221e+06	1.74058e+06	2.03272e+06	1.31277e+06	1.51948e+06	1.58471e+06	1.81184e+06	1.47232e+06	1.2306	0.299362	up	0.0490512	0.0814472	low
Jr10_01870_p1 (+2)	108985959	Q9LVP9	VIT_17s0000g06580	Vesicle transport v-SNARE 13 (AtVTI13)	24574	519997	691519	617052	433027	550648	502984	609523	495553	1.22998	0.298639	up	0.100097	0.149691	no
Jr11_27990_p1	109009577	Q9FVU9	VIT_03s0038g04360	COP9 signalosome complex subunit 5b (Signalosome subunit 5b)	39615	819400	988110	1.07315e+06	753732	791132	798634	960220	781166	1.22921	0.297735	up	0.0597629	0.0967337	low
Jr16_17140_p1	109006528	Q8VWF1	VIT_18s0001g13530	SH3 domain-containing protein 2	41329	77957.3	70061.2	80442.6	49889.7	63703.3	72304.5	76153.7	61965.8	1.22896	0.29744	up	0.195957	0.267671	no
Jr09_05990_p1	108994365	O65202	VIT_00s0389g00020	Peroxisomal acyl-coenzyme A oxidase 1 (AOX 1)	74136	521829	458862	587760	358970	474154	444641	522817	425922	1.2275	0.295718	up	0.111165	0.164085	no
Jr03_13210_p1	#N/A	Q8GWU0	VIT_00s0194g00110	Phosphoglycolate phosphatase 2	33256	1.51422e+06	1.48593e+06	1.46813e+06	1.25824e+06	1.21805e+06	1.16464e+06	1.48943e+06	1.21364e+06	1.22723	0.29541	up	0.0212928	0.0391417	med
Jr12_11810_p1 (+1)	109005939	Q9SQT8	VIT_05s0020g02030	Shikimate dehydrogenase	61022	1.26931e+06	1.55758e+06	1.1042e+06	1.24118e+06	1.00415e+06	960312	1.31036e+06	1.06855e+06	1.2263	0.294317	up	0.11633	0.170943	no
Jr12_11890_p1 (+1)	109005935	Q8LGE7	VIT_05s0020g02150	NADH dehydrogenase [ubiquinone] 1 alpha subcomplex subunit 8-B	16359	688182	563790	581646	396572	429246	669862	611206	498560	1.22594	0.293892	up	0.213397	0.287437	no
Jr07_26570_p1	109013060	O49006	VIT_09s0002g00320	Pectinesterase 3	65406	302649	417999	420038	348669	304523	278405	380229	310533	1.22444	0.292122	up	0.15199	0.215125	no
Jr03_07080_p1 (+2)	#N/A	Q94AP0	VIT_06s0009g02790	Allantoinase (AtALN)	56003	747502	1.23498e+06	707298	911929	641345	644767	896594	732681	1.22372	0.291271	up	0.275544	0.356433	no
Jr08_22400_p1 (+1)	108994267	F4K5T4	VIT_00s0868g00010	Probable transcription factor At5g28040	44402	107099	134004	162521	51133.2	152381	126371	134541	109962	1.22353	0.291048	up	0.471269	0.559145	no
Jr05_05650_p1	108996387	Q9LV60	VIT_07s0141g00930	Cysteine-rich repeat secretory protein 55	29388	5.82729e+06	7.60538e+06	6.94716e+06	5.46815e+06	5.78119e+06	5.413e+06	6.79328e+06	5.55412e+06	1.22311	0.290551	up	0.0359126	0.0617142	low
Jr04_20640_p1	109013518	P57720	VIT_08s0032g01170	Chorismate synthase, chloroplastic	36092	284562	333158	311087	303495	229488	226567	309602	253183	1.22284	0.290233	up	0.140314	0.20064	no
Jr07_11140_p1	108985313	Q9LTR2	VIT_05s0102g01210	Protein TRIGALACTOSYLDIACYLGLYCEROL 2, chloroplastic	41980	79207.8	94975	82292.5	64379.8	78078.6	67298.9	85491.8	69919.1	1.22272	0.290099	up	0.169362	0.236112	no
Jr01_19950_p1	108991991	Q8VYN9	VIT_12s0134g00430	Universal stress protein PHOS32	27004	2.9163e+06	2.7386e+06	2.61157e+06	2.36149e+06	2.14093e+06	2.25896e+06	2.75549e+06	2.25379e+06	1.2226	0.289953	up	0.0206692	0.0381656	med
Jr11_17570_p1	109007747	A4GSN8	VIT_18s0122g00110	Nuclear-pore anchor	85074	2.15045e+06	2.21072e+06	2.31713e+06	1.67007e+06	1.89677e+06	1.89721e+06	2.2261e+06	1.82135e+06	1.22223	0.289511	up	0.0259102	0.0464889	med
Jr07_22420_p1	109019525	Q94BR4	VIT_05s0049g01840	Pre-mRNA-processing factor 19 homolog 1	56883	92118	99665.4	96984.6	80440.7	83100.1	72814	96256	78784.9	1.22176	0.288956	up	0.141922	0.202412	no
Jr04_22000_p1	108987512	Q8L7U5	VIT_08s0007g03720	Serine/threonine-protein phosphatase BSL1	36913	187353	483385	149656	247949	286545	137665	273464	224053	1.22054	0.287516	up	0.551152	0.634952	no
Jr11_09950_p1	108979131	F4IAG2	VIT_18s0001g07870	Starch synthase 3, chloroplastic/amyloplastic (AtSS3)	13971	596949	579638	554769	524653	411276	483975	577119	473301	1.21935	0.286109	up	0.0780341	0.121665	no
Jr03_06780_p1	109020781	Q9ZPV9	VIT_00s0480g00060	Polyphenol oxidase 1 (JrPPO1)	68269	8.62381e+07	7.94914e+07	8.4874e+07	6.84838e+07	7.20462e+07	6.53988e+07	8.35345e+07	6.86429e+07	1.21694	0.283261	up	0.0190186	0.0353355	med
Jr07_18050_p1	109019363	Q93VR4	VIT_05s0077g01650	MLP-like protein 423	17279	4.02697e+08	4.55502e+08	4.61201e+08	3.63501e+08	3.36433e+08	3.85263e+08	4.398e+08	3.61732e+08	1.21582	0.281925	up	0.033796	0.0587199	low
Jr01_28750_p1 (+2)	108992670	Q9FL69	VIT_11s0016g04210	ADP-ribosylation factor GTPase-activating protein AGD5 (ARF GAP AGD5)	86081	2.22314e+06	2.51041e+06	2.13591e+06	1.61062e+06	1.97322e+06	2.07192e+06	2.28982e+06	1.88525e+06	1.2146	0.280477	up	0.0681704	0.108389	no
Jr01_15330_p1 (+1)	#N/A	Q9FIB6	VIT_07s0031g01970	26S proteasome non-ATPase regulatory subunit 12 homolog A	50643	86860.4	117733	104012	86338.4	93216.3	75005.9	102868	84853.5	1.21231	0.277753	up	0.210654	0.283974	no
Jr01_02110_p1	109001395	Q9LQ55	VIT_18s0089g00350	Dynamin-2B	100949	2.35281e+06	2.36375e+06	2.22668e+06	1.76278e+06	1.98213e+06	1.98404e+06	2.31441e+06	1.90965e+06	1.21196	0.277339	up	0.0298576	0.0526824	low
Jr02_03960_p1	108999172	Q94JX5	VIT_17s0000g07820	LIM domain-containing protein WLIM1	23238	198474	230967	223973	191244	173476	174579	217804	179766	1.2116	0.276912	up	0.123779	0.179804	no
Jr06_19960_p1_family	109019484	O81862	VIT_11s0149g00280	Class V chitinase (AtChiC)	43675	2.06899e+06	1.90925e+06	2.34641e+06	1.16938e+06	2.08245e+06	1.96966e+06	2.10822e+06	1.7405e+06	1.21127	0.276523	up	0.236976	0.31293	no
Jr11_27970_p1 (+1)	109009575	Q9SJB3	VIT_04s0008g02460	ATPase 5, plasma membrane-type	105129	424831	396883	412930	303670	352770	362859	411548	339766	1.21127	0.276517	up	0.0903662	0.137574	no
Jr16_11010_p1	108989817	Q8VYZ0	VIT_01s0026g01430	E3 ubiquitin-protein ligase ORTHRUS 2	33674	495274	629388	502660	414836	464745	464017	542441	447866	1.21117	0.276398	up	0.104845	0.155943	no
Jr15_06420_p1	108991734	Q8H0Y1	VIT_18s0001g12290	Outer envelope pore protein 24B, chloroplastic	29866	1.84585e+06	1.63717e+06	1.87233e+06	1.37145e+06	1.45946e+06	1.59207e+06	1.78511e+06	1.47433e+06	1.2108	0.275957	up	0.0474105	0.0787627	low
Jr10_07940_p1	#N/A	P25696	VIT_16s0022g01770	Bifunctional enolase 2/transcriptional activator	48010	1.08981e+08	1.02264e+08	1.12195e+08	9.06655e+07	8.65658e+07	8.99064e+07	1.07813e+08	8.90459e+07	1.21076	0.275912	up	0.0208859	0.0385442	med
Jr01_02350_p1	109001411	Q9SR13	VIT_18s0001g05630	Flowering locus K homology domain (Flowering locus KH domain)	81316	187861	271890	206318	258388	138808	153232	222023	183476	1.21009	0.275117	up	0.352592	0.438049	no
Jr10_24880_p1	109020765	Q8LPF4	VIT_07s0005g04620	Amino acid transporter AVT1E (AtAvt1E)	12383	390578	273723	246119	172427	302277	277901	303473	250868	1.20969	0.27464	up	0.33628	0.421918	no
Jr11_00600_p1	109014126	Q8S2T0	VIT_04s0210g00200	Protein GRIP (AtGRIP)	91171	453452	483504	391826	359727	363178	375598	442927	366168	1.20963	0.274565	up	0.0925228	0.140403	no
Jr02_04790_p1 (+2)	108999215	Q9FM19	VIT_17s0000g05680	Hypersensitive-induced response protein 1 (AtHIR1)	31352	549690	564204	568476	391339	516418	484299	560790	464019	1.20855	0.273279	up	0.103392	0.153851	no
Jr08_09820_p1 (+1)	109022234	B3LF48	VIT_18s0122g01080	EH domain-containing protein 2 (AtEHD2)	108595	906720	1.0125e+06	866790	760164	741616	805099	928671	768960	1.2077	0.27226	up	0.0588051	0.0955257	low
Jr05_02250_p1	108989819	Q96252	VIT_15s0021g00920	ATP synthase subunit delta', mitochondrial	25168	4.0795e+06	3.16204e+06	3.26514e+06	2.679e+06	2.3701e+06	3.652e+06	3.50223e+06	2.90037e+06	1.20751	0.272038	up	0.173241	0.240523	no
Jr01_34390_p1	109011861	P49572	VIT_12s0057g01240	Indole-3-glycerol phosphate synthase, chloroplastic (IGPS)	43841	1.94105e+06	1.63223e+06	1.7147e+06	1.46482e+06	1.39126e+06	1.5288e+06	1.76266e+06	1.46163e+06	1.20596	0.270176	up	0.0508138	0.0840775	low
Jr02_22880_p1	109014025	Q8L6Y1	VIT_19s0014g03920	Ubiquitin carboxyl-terminal hydrolase 14	89696	979560	1.00957e+06	1.11739e+06	933567	941058	703498	1.03551e+06	859375	1.20496	0.26898	up	0.114383	0.168231	no
Jr11_28070_p1	109009581	Q8H1G5	VIT_04s0008g02540	Cytoplasmic 60S subunit biogenesis factor REI1 homolog 1	47201	83843.3	67794.4	84868.2	50417.9	78045.4	67874.4	78835.3	65445.9	1.20459	0.268538	up	0.279146	0.360245	no
Jr03_24960_p1_family	#N/A	P29516	VIT_16s0050g00380	Tubulin beta-8 chain	50451	375576	430970	501558	449027	387636	249500	436035	362054	1.20434	0.268237	up	0.288321	0.370634	no
Jr10_00940_p1 (+2)	109001905	P35614	VIT_18s0001g12240	Eukaryotic peptide chain release factor subunit 1-3 (Eukaryotic release factor 1-3; eRF1-3)	49063	1.79736e+06	1.80688e+06	1.91396e+06	1.70622e+06	1.57657e+06	1.30386e+06	1.8394e+06	1.52888e+06	1.2031	0.266757	up	0.076565	0.119885	no
Jr03_01390_p1	109005339	Q9LFA3	VIT_08s0007g03610	Monodehydroascorbate reductase 1, peroxisomal (AtMDAR1)	47468	3.9527e+07	4.15307e+07	4.23926e+07	3.57135e+07	3.53589e+07	3.15437e+07	4.11501e+07	3.42054e+07	1.20303	0.266673	up	0.0280676	0.0498173	med
Jr16_06490_p1	108981058	Q8H1S4	VIT_01s0011g05650	1-aminocyclopropane-1-carboxylate oxidase homolog 3	40505	6.24122e+06	6.95917e+06	5.88735e+06	5.53983e+06	5.20944e+06	5.12353e+06	6.36258e+06	5.29094e+06	1.20254	0.266089	up	0.0306057	0.0538007	low
Jr11_16260_p1	109007201	Q8W4N3	VIT_07s0005g01650	Ubiquitin carboxyl-terminal hydrolase 2	130972	613779	694608	664104	587189	562476	491420	657497	547029	1.20194	0.265368	up	0.086095	0.132232	no
Jr02_17750_p1	109014479	A2RVM0	VIT_02s0025g03380	Short-chain dehydrogenase TIC 32, chloroplastic	38729	1.803e+06	1.97217e+06	1.54172e+06	1.54563e+06	1.37569e+06	1.50243e+06	1.7723e+06	1.47458e+06	1.2019	0.265313	up	0.076628	0.119927	no
Jr04_19780_p1	108982717	Q9C6S6	VIT_08s0007g06710	Putative pentatricopeptide repeat-containing protein At1g31840	38745	163755	185297	166842	150992	150776	127520	171965	143096	1.20174	0.26513	up	0.163974	0.229392	no
Jr13_19580_p1 (+1)	109005776	P36428	VIT_01s0011g02280	Alanine--tRNA ligase	116665	191408	203857	232287	186292	190420	145945	209184	174219	1.20069	0.263868	up	0.1933	0.264364	no
Jr12_02590_p1	108998261	P48348	VIT_18s0001g07240	14-3-3-like protein GF14 kappa	33200	5.11381e+06	6.07985e+06	5.49992e+06	5.1804e+06	4.69136e+06	4.03651e+06	5.56453e+06	4.63609e+06	1.20026	0.26335	up	0.0671119	0.106964	no
Jr10_04940_p1	108987084	Q93ZC5	VIT_14s0083g00110	Allene oxide cyclase 4, chloroplastic	28025	1.5663e+07	1.59846e+07	1.51529e+07	1.32513e+07	1.29856e+07	1.27592e+07	1.56002e+07	1.29987e+07	1.20013	0.263193	up	0.0176544	0.0330839	med
Jr14_16370_p1	108998953	P46011	VIT_06s0080g00940	Bifunctional nitrilase/nitrile hydratase NIT4	37502	1.92692e+06	2.23221e+06	2.18535e+06	1.75586e+06	1.72384e+06	1.8091e+06	2.11482e+06	1.76293e+06	1.1996	0.262559	up	0.0444945	0.0747853	low
Jr01_27270_p1	109010286	O04373	VIT_11s0016g02700	IAA-amino acid hydrolase ILR1-like 4	53527	185475	178134	239058	158792	163680	180168	200889	167547	1.199	0.261837	up	0.197663	0.26966	no
Jr01_00890_p1 (+3)	109001290	Q8LPJ3	VIT_14s0068g01120	Probable alpha-mannosidase At5g13980	114482	2.90446e+07	3.33033e+07	3.48593e+07	2.72462e+07	2.84709e+07	2.53586e+07	3.24024e+07	2.70253e+07	1.19897	0.261791	up	0.0445585	0.0748397	low
Jr12_04080_p1	109002047	Q8GYH8	VIT_15s0046g02320	Probable sulfate transporter 4.2	25151	1.69464e+06	1.65718e+06	1.50424e+06	1.18156e+06	1.37556e+06	1.49357e+06	1.61869e+06	1.35023e+06	1.19883	0.261624	up	0.0802834	0.124642	no
Jr16_17930_p1	109020739	Q8LGG8	VIT_03s0038g04750	Universal stress protein A-like protein	19862	6.01531e+06	6.2951e+06	5.1466e+06	4.74577e+06	4.57848e+06	5.24761e+06	5.819e+06	4.85729e+06	1.19799	0.260622	up	0.0513545	0.0848018	low
Jr10_00620_p1	109001875	F4HRT5	VIT_14s0006g03280	Protein CROWDED NUCLEI 1	138973	9743.14	12606.5	14563.6	6953.23	11600.7	12266.3	12304.4	10273.4	1.19769	0.260253	up	0.398689	0.485976	no
Jr16_15440_p1	109006669	Q949P3	VIT_03s0038g04010	Uncharacterized protein At2g17340	40971	3.1866e+06	2.96042e+06	3.393e+06	2.83301e+06	2.67316e+06	2.46546e+06	3.18e+06	2.65721e+06	1.19675	0.259117	up	0.0453757	0.0759951	low
Jr10_09890_p1	108985510	A8MQR0	VIT_03s0017g01690	WPP domain-interacting tail-anchored protein 2	155677	1.24854e+07	1.47276e+07	1.3806e+07	1.16895e+07	1.14078e+07	1.12092e+07	1.3673e+07	1.14355e+07	1.19567	0.257815	up	0.0328363	0.0572638	low
Jr13_16200_p1	108984711	Q9SRH5	VIT_01s0026g01650	Mitochondrial outer membrane protein porin 1	29568	3.24991e+07	3.51235e+07	3.61754e+07	2.91652e+07	2.82983e+07	2.93495e+07	3.45993e+07	2.89376e+07	1.19565	0.257797	up	0.0273427	0.0486881	med
Jr04_13430_p1	108996373	Q8GYK2	VIT_00s0515g00010	Probable carboxylesterase SOBER1-like	27448	594648	777900	697661	600220	565753	565714	690070	577229	1.19549	0.257598	up	0.111026	0.163953	no
Jr13_09100_p1	108993430	O22468	VIT_03s0038g02430	WD-40 repeat-containing protein MSI2	45942	366900	278490	380733	298800	288983	270675	342041	286153	1.19531	0.257384	up	0.17644	0.244244	no
Jr01_29830_p1	109006240	O48782	VIT_11s0016g05300	Heme oxygenase 1, chloroplastic (AtHO1)	32464	2.35304e+06	2.31144e+06	2.32547e+06	1.86317e+06	1.97877e+06	2.00635e+06	2.32998e+06	1.94943e+06	1.19521	0.257266	up	0.033967	0.0589238	low
Jr08_21810_p1	109006814	Q42029	VIT_14s0128g00030	Oxygen-evolving enhancer protein 2-1, chloroplastic (OEE2)	26909	302264	240225	323400	135987	280840	307761	288630	241529	1.19501	0.257021	up	0.425021	0.513159	no
Jr12_15920_p1	109005035	Q8LAC4	VIT_05s0094g01420	Probable uridine nucleosidase 2	34457	346721	291999	301873	244915	260407	282191	313531	262504	1.19439	0.256269	up	0.14162	0.202157	no
Jr07_02550_p1 (+1)	108991304	Q9FGF0	VIT_18s0001g08030	Phosphoglycerate mutase-like protein 1	37826	1.68818e+06	1.63904e+06	1.59726e+06	1.45525e+06	1.34314e+06	1.32503e+06	1.64149e+06	1.37447e+06	1.19427	0.25613	up	0.0472551	0.0786233	low
Jr13_06340_p1 (+1)	109010250	Q93Z70	VIT_03s0063g01110	Probable N-acetyl-gamma-glutamyl-phosphate reductase, chloroplastic (AGPR)	43133	1.12226e+07	1.30504e+07	1.25662e+07	1.15817e+07	1.01992e+07	9.06687e+06	1.22797e+07	1.02826e+07	1.19423	0.256075	up	0.0693725	0.10977	no
Jr10_15150_p1	109004250	Q9LTA3	VIT_12s0028g03780	UDP-glycosyltransferase 91C1	30318	1.53534e+06	1.62287e+06	1.60417e+06	1.3232e+06	1.29382e+06	1.37189e+06	1.58746e+06	1.32964e+06	1.19391	0.25569	up	0.0442816	0.0745174	low
Jr03_25560_p1	108994925	Q9XF88	VIT_08s0007g02190	Chlorophyll a-b binding protein CP29.2, chloroplastic	30966	6.15913e+07	4.76391e+07	4.51202e+07	4.04393e+07	3.88412e+07	5.00715e+07	5.14502e+07	4.31173e+07	1.19326	0.254909	up	0.145465	0.206929	no
Jr11_21440_p1 (+1)	108981294	O80852	VIT_18s0001g08010	Glutathione S-transferase F9 (AtGSTF9)	51074	3.57475e+06	3.93377e+06	3.78623e+06	3.07693e+06	3.17833e+06	3.21224e+06	3.76492e+06	3.15583e+06	1.193	0.254597	up	0.0295404	0.0522626	low
Jr15_06850_p1_family	108991713	O23712	VIT_18s0001g12760	Proteasome subunit alpha type-1-B	30683	2.68254e+07	2.75799e+07	2.68535e+07	2.33668e+07	2.23592e+07	2.23881e+07	2.70863e+07	2.27047e+07	1.19298	0.25457	up	0.0228685	0.0417125	med
Jr07_05070_p1	109013824	Q8GYN5	VIT_00s0231g00040	RPM1-interacting protein 4	29979	200178	201524	184042	176634	151597	162847	195248	163692	1.19277	0.254319	up	0.161171	0.226147	no
Jr11_25190_p1	108998894	Q9FKM2	VIT_11s0052g01030	Mitochondrial outer membrane protein porin 4	29281	5.68746e+06	6.20418e+06	6.06222e+06	4.91968e+06	4.78982e+06	5.34767e+06	5.98462e+06	5.01906e+06	1.19238	0.253843	up	0.030592	0.0538007	low
Jr03_23150_p1_family	108981022	Q9LFF9	VIT_08s0040g02470	Soluble inorganic pyrophosphatase 4	24686	116893	110550	142665	93979.9	99898	116558	123369	103478	1.19222	0.253651	up	0.236309	0.312425	no
Jr07_27820_p1 (+1)	109002000	Q94AM9	VIT_09s0002g01560	Polyadenylate-binding protein-interacting protein 4 (PABP-interacting protein 4; Poly(A)-binding protein-interacting protein 4)	69993	446781	351475	408823	339401	342155	331192	402360	337583	1.19188	0.253245	up	0.133901	0.192195	no
Jr04_21480_p1	109018683	Q84MB3	VIT_08s0007g03050	1-aminocyclopropane-1-carboxylate oxidase homolog 1	41066	253849	282401	272221	174978	272170	231511	269490	226219	1.19128	0.25251	up	0.241968	0.318756	no
Jr05_08590_p1_family	109002640	P13853	VIT_13s0019g03160	17.6 kDa class I heat shock protein 3	24296	74674.2	241963	45013.9	74264.2	170313	59270.9	120550	101283	1.19024	0.251246	up	0.703616	0.770471	no
Jr03_18040_p1	108996949	Q9S7Y7	VIT_10s0092g00240	Alpha-xylosidase 1	103362	1.12568e+06	1.09238e+06	1.10432e+06	864128	864399	1.06311e+06	1.10746e+06	930545	1.19012	0.251111	up	0.0946182	0.14299	no
Jr11_01660_p1	109021284	Q8GX84	VIT_14s0030g00700	Zinc finger CCCH domain-containing protein 1 (AtC3H1)	21568	163910	212806	185017	187915	141027	143344	187244	157429	1.18939	0.25022	up	0.248286	0.326036	no
Jr02_16530_p1	108987143	F4JZY1	VIT_02s0025g01170	COP1-interactive protein 1	150845	1.4873e+06	1.94451e+06	1.65619e+06	1.3555e+06	1.48666e+06	1.44117e+06	1.696e+06	1.42778e+06	1.18786	0.248364	up	0.102726	0.152929	no
Jr11_19980_p1	109000874	Q9FZG4	VIT_18s0001g14230	Hexokinase-like 1 protein	46670	1.31471e+06	1.41604e+06	1.32174e+06	1.17515e+06	1.14894e+06	1.0886e+06	1.35083e+06	1.13756e+06	1.18748	0.247903	up	0.0598678	0.0968226	low
Jr07_06460_p1	108996400	Q8GWP5	VIT_15s0046g02860	Inactive 5-amino-6-(5-phosphoribosylamino)uracil reductase	46942	404006	441028	408464	384426	325124	346100	417833	351883	1.18742	0.247829	up	0.125622	0.18216	no
Jr12_18850_p1	109007848	Q9C5H4	VIT_09s0002g03990	Protein MODIFIED TRANSPORT TO THE VACUOLE 1	77240	415746	304704	347120	336171	289459	273488	355857	299706	1.18735	0.247749	up	0.203122	0.275851	no
Jr01_00020_p1 (+1)	108990460	P58223	VIT_14s0108g01040	KH domain-containing protein At4g18375	58475	711713	650064	674079	588116	563212	563658	678619	571662	1.1871	0.24744	up	0.0798512	0.124163	no
Jr13_10800_p1	108997460	F4IIM1	VIT_01s0150g00600	Protein CELLULOSE SYNTHASE INTERACTIVE 1	44887	889262	902429	903718	670611	777835	822401	898470	756949	1.18696	0.247274	up	0.0948871	0.143331	no
Jr15_00200_p1	109002773	Q9FGL9	VIT_10s0071g00740	Polypyrimidine tract-binding protein homolog 2	20412	268292	261368	226411	164327	247123	225593	252024	212348	1.18684	0.247131	up	0.256551	0.335286	no
Jr10_11370_p1	109012774	A2RVJ8	VIT_07s0031g01480	Protein HEAT INTOLERANT 4	40056	78532.9	78119.8	88302.8	55727.9	74501.1	76333.2	81651.8	68854.1	1.18587	0.245943	up	0.272726	0.353204	no
Jr_Juglans_regia_chloroplast_00010_p1 (+1)	#N/A	P56765	VIT_08s0007g07890	Acetyl-coenzyme A carboxylase carboxyl transferase subunit beta, chloroplastic (ACCase subunit beta; Acetyl-CoA carboxylase carboxyltransferase subunit beta)	56042	587593	648488	648785	586785	603312	399864	628289	529987	1.18548	0.24547	up	0.219209	0.293823	no
Jr11_16780_p1	109005990	Q9FJI4	VIT_07s0005g02130	Putative L-type lectin-domain containing receptor kinase I.11 (LecRK-I.11)	85360	3.63736e+06	4.57019e+06	3.82615e+06	3.78519e+06	3.45636e+06	2.91197e+06	4.01123e+06	3.38451e+06	1.18517	0.245099	up	0.118908	0.173878	no
Jr08_13830_p1 (+2)	109006001	Q9C8Y1	VIT_05s0049g02070	Probable calcium-binding protein CML23	31109	175163	173969	193879	156000	168747	133738	181004	152828	1.18436	0.244107	up	0.205741	0.278718	no
Jr13_18980_p1	109006874	Q9LS48	VIT_01s0010g01810	protein SLOW GREEN 1, chloroplastic	38917	3.67136e+06	3.61488e+06	3.67102e+06	2.98662e+06	3.03688e+06	3.23418e+06	3.65242e+06	3.08589e+06	1.18359	0.243166	up	0.0357222	0.0614832	low
Jr15_06840_p1_family	108991729	Q9FWR5	VIT_18s0001g12730	Gamma carbonic anhydrase 1, mitochondrial (AtCA1; GAMMA CA1)	29768	4.38574e+06	4.87837e+06	4.06375e+06	4.15243e+06	3.44944e+06	3.67042e+06	4.44262e+06	3.75743e+06	1.18236	0.241664	up	0.077962	0.121618	no
Jr16_15670_p1	109006648	Q9SII8	VIT_03s0038g03680	Ubiquitin domain-containing protein DSK2b	59339	346402	355199	355948	274926	309973	309664	352516	298188	1.1822	0.24147	up	0.134551	0.192901	no
Jr04_03010_p1	109006783	P22953	VIT_06s0004g04510	Probable mediator of RNA polymerase II transcription subunit 37e	71265	1.73663e+07	2.01553e+07	1.90319e+07	1.80795e+07	1.52853e+07	1.44785e+07	1.88512e+07	1.59478e+07	1.18205	0.241295	up	0.0828917	0.128268	no
Jr09_13650_p1	108992489	Q9ZP06	VIT_10s0003g01000	Malate dehydrogenase 1, mitochondrial	36650	4.35602e+07	4.85328e+07	4.54621e+07	4.3862e+07	3.60393e+07	3.65113e+07	4.58517e+07	3.88042e+07	1.18162	0.240762	up	0.0761767	0.119334	no
Jr08_13120_p1	108994507	Q9LF46	VIT_07s0104g00670	2-hydroxyacyl-CoA lyase	53790	815476	954546	881224	767239	710915	766383	883749	748179	1.1812	0.240252	up	0.0961531	0.145044	no
Jr05_08280_p1	109002612	Q8VZI8	VIT_06s0004g05030	ATP-dependent zinc metalloprotease FTSH 10, mitochondrial (AtFTSH10)	80230	200051	211157	245484	154806	214756	186963	218897	185509	1.17998	0.238766	up	0.2515	0.329706	no
Jr14_13460_p1	108990122	Q9FLX9	VIT_06s0004g03040	Notchless protein homolog	60702	24671.5	32250.6	27972.2	26556.8	26514.1	18908.9	28298.1	23993.2	1.17942	0.238075	up	0.342114	0.427125	no
Jr02_05810_p1	108995464	Q9SN86	VIT_17s0000g06270	Malate dehydrogenase, chloroplastic	31787	3.27686e+07	3.3581e+07	3.10959e+07	2.8149e+07	2.69702e+07	2.75139e+07	3.24818e+07	2.75444e+07	1.17925	0.237875	up	0.0374546	0.0639308	low
Jr15_01390_p1	#N/A	Q9LMN4	VIT_18s0072g00710	Sm-like protein LSM3A (AtLSM3A)	15669	1.09403e+06	892050	1.29581e+06	705436	994702	1.08349e+06	1.09396e+06	927875	1.179	0.237561	up	0.283206	0.364913	no
Jr11_25910_p1	109003096	Q9SR15	VIT_12s0028g03370	Tryptophan--tRNA ligase, cytoplasmic	47217	543267	468537	571671	425119	514378	403867	527825	447788	1.17874	0.237242	up	0.176409	0.244244	no
Jr02_01970_p1 (+1)	109012431	Q93ZT6	VIT_17s0000g09870	Eukaryotic translation initiation factor isoform 4G-1 (eIF(iso)4G-1)	77602	879665	1.16269e+06	920231	1.13795e+06	793169	583443	987529	838187	1.17817	0.236552	up	0.365844	0.45231	no
Jr01_27010_p1 (+1)	109009875	Q42538	VIT_11s0016g02450	Serine acetyltransferase 5 (AtSAT-5)	31135	108143	80306	88527.6	83556.1	76846	74719.3	92325.4	78373.8	1.17801	0.236356	up	0.273801	0.354457	no
Jr04_20620_p1	109013517	Q39061	VIT_08s0032g01180	RNA-binding protein CP33, chloroplastic	35247	1.37919e+06	1.04851e+06	1.38175e+06	805601	1.14704e+06	1.28245e+06	1.26981e+06	1.07836e+06	1.17754	0.235777	up	0.278152	0.359102	no
Jr07_25400_p1	109009306	O80567	VIT_05s0094g01400	La-related protein 6B (AtLARP6b)	52366	86723.6	84822.8	83392.5	72773.6	77986.7	65834	84979.6	72198.1	1.17703	0.235155	up	0.238904	0.315223	no
Jr15_11480_p1	108993136	F4HYF3	VIT_17s0000g00870	Bifunctional D-cysteine desulfhydrase/1-aminocyclopropane-1-carboxylate deaminase, mitochondrial	47118	1.74498e+06	1.4645e+06	1.64992e+06	1.3957e+06	1.36133e+06	1.37416e+06	1.6198e+06	1.37706e+06	1.17627	0.234224	up	0.0854595	0.131378	no
Jr07_24410_p1	108989481	Q9LIK9	VIT_05s0020g04210	ATP sulfurylase 1, chloroplastic (AtPS1)	52279	572060	370873	495636	354356	429063	439801	479523	407740	1.17605	0.23395	up	0.267898	0.348321	no
Jr12_03400_p1	109012110	Q9M2E2	VIT_15s0046g03590	(+)-neomenthol dehydrogenase	32248	153762	103318	120858	78559.5	119958	122894	125979	107137	1.17587	0.233729	up	0.383734	0.469679	no
Jr12_09330_p1	108995891	Q5XVC7	VIT_03s0038g01240	WEB family protein At2g40480	48647	559078	713722	529798	680060	445745	407734	600866	511180	1.17545	0.233213	up	0.336692	0.422114	no
Jr13_06710_p1	109010699	Q9SZR3	VIT_03s0063g01800	Protein SMAX1-LIKE 4 (AtSMXL4)	34245	258828	258749	300346	201202	257239	237781	272641	232074	1.1748	0.232419	up	0.216502	0.290549	no
Jr08_21890_p1	109004539	P46416	VIT_14s0030g00030	Glutathione synthetase, chloroplastic (GSH synthetase; GSH-S; Glutathione synthase)	62910	1.8559e+06	1.8385e+06	1.85099e+06	1.50801e+06	1.53587e+06	1.67667e+06	1.84847e+06	1.57352e+06	1.17474	0.232335	up	0.0675504	0.107611	no
Jr12_22630_p1	109003012	Q9FZD9	VIT_13s0067g03850	DUF724 domain-containing protein 3 (AtDUF3)	76486	2.06857e+06	2.09007e+06	1.78877e+06	1.50619e+06	1.81419e+06	1.74311e+06	1.98247e+06	1.68783e+06	1.17457	0.232129	up	0.110803	0.16377	no
Jr08_16420_p1	#N/A	Q9SQZ9	VIT_14s0030g01910	PITH domain-containing protein At3g04780	19500	8.37991e+06	9.45175e+06	8.51079e+06	8.0282e+06	7.32978e+06	7.07669e+06	8.78082e+06	7.47822e+06	1.17419	0.23166	up	0.058417	0.0949889	low
Jr02_05650_p1	108995486	Q9FGH6	VIT_17s0000g06060	Cation/H(+) antiporter 25	43477	275514	178961	131820	131230	175254	192922	195432	166469	1.17399	0.231417	up	0.457626	0.545905	no
Jr02_00090_p1	109000464	Q8VZG7	VIT_00s0283g00020	Ribonuclease TUDOR 1 (AtTudor1; TUDOR-SN protein 1)	108827	4.08663e+06	4.03652e+06	4.09782e+06	3.65718e+06	3.66381e+06	3.09272e+06	4.07366e+06	3.47124e+06	1.17355	0.230875	up	0.067032	0.106888	no
Jr13_06000_p1_family	109002340	Q9LMA7	VIT_03s0063g00780	Probable carboxylesterase 1	33591	2.08591e+06	2.48078e+06	2.67265e+06	2.51261e+06	1.98608e+06	1.67379e+06	2.41312e+06	2.05749e+06	1.17284	0.230009	up	0.225799	0.3007	no
Jr04_17870_p1	108984804	Q93Y09	VIT_08s0040g01140	Serine carboxypeptidase-like 45	56449	638782	717982	885120	709894	650626	551260	747294	637260	1.17267	0.229794	up	0.219881	0.294485	no
Jr02_18970_p1	109010746	Q96323	VIT_02s0025g04720	Leucoanthocyanidin dioxygenase (LDOX; Leucocyanidin oxygenase)	40197	1.87793e+06	2.04273e+06	2.85935e+06	2.3567e+06	1.75582e+06	1.66972e+06	2.26001e+06	1.92741e+06	1.17256	0.229661	up	0.291196	0.373455	no
Jr04_08630_p1	108985046	Q8RYE9	VIT_01s0011g01160	Haloacid dehalogenase-like hydrolase domain-containing protein At2g33255	28782	706283	723922	795624	640866	610377	647965	741943	633069	1.17198	0.228945	up	0.108375	0.160613	no
Jr12_21590_p1_family	108983079	Q9LZ82	VIT_13s0019g05360	Protein BTR1	33578	2.9813e+06	2.84284e+06	3.02916e+06	2.5205e+06	2.51406e+06	2.52324e+06	2.9511e+06	2.51927e+06	1.17141	0.228251	up	0.051663	0.0851407	low
Jr01_10040_p1	108988123	Q9SCZ4	VIT_14s0068g00090	Receptor-like protein kinase FERONIA	99916	613936	560886	605618	452761	509919	557427	593480	506702	1.17126	0.228062	up	0.147459	0.209584	no
Jr02_05500_p1_family	#N/A	Q9FLF0	VIT_14s0108g00460	40S ribosomal protein S9-2	23086	2.80401e+06	4.67404e+06	6.08683e+06	4.09607e+06	4.27854e+06	3.21501e+06	4.52163e+06	3.86321e+06	1.17043	0.227042	up	0.413211	0.501083	no
Jr11_25380_p1	108983167	Q9C7Z9	VIT_11s0052g00770	Serine carboxypeptidase-like 18	55380	1.06413e+06	1.31347e+06	1.3262e+06	981922	948824	1.2346e+06	1.2346e+06	1.05512e+06	1.17011	0.226643	up	0.191498	0.262323	no
Jr01_13400_p1	108996350	Q9SLH0	VIT_01s0011g01690	ETHYLENE INSENSITIVE 3-like 1 protein	56056	114621	104645	117823	95424.4	96467.7	96229.6	112363	96040.6	1.16995	0.226448	up	0.234681	0.310522	no
Jr14_22220_p1	109003701	Q9FM96	VIT_06s0004g00140	Glucosidase 2 subunit beta	71341	1.08581e+06	905349	984070	861595	901763	779966	991744	847775	1.16982	0.226286	up	0.131717	0.189686	no
Jr07_05720_p1	108982604	P92965	VIT_15s0048g01870	Serine/arginine-rich splicing factor RS40 (At-RSp40; AtRS40)	29417	210646	99114.4	234748	95507.1	182200	188006	181503	155238	1.1692	0.225517	up	0.568253	0.651239	no
Jr11_18230_p1	109022245	Q9SFX3	VIT_18s0122g00890	Dolichyl-diphosphooligosaccharide--protein glycosyltransferase subunit 1A	68157	1.63415e+06	1.6486e+06	1.76464e+06	1.54016e+06	1.55313e+06	1.2303e+06	1.68246e+06	1.4412e+06	1.16741	0.223307	up	0.136601	0.195755	no
Jr11_15270_p1	108994152	P93033	VIT_07s0005g00880	Fumarate hydratase 1, mitochondrial (Fumarase 1)	53205	2.13183e+07	2.42434e+07	2.02029e+07	2.06628e+07	1.7576e+07	1.81158e+07	2.19215e+07	1.87849e+07	1.16698	0.222778	up	0.0997282	0.149363	no
Jr05_06190_p1	109002414	Q9M2F9	VIT_06s0004g08160	DEAD-box ATP-dependent RNA helicase 52	61189	1.93976e+06	1.66199e+06	2.42734e+06	1.17364e+06	1.9833e+06	2.01313e+06	2.0097e+06	1.72336e+06	1.16615	0.221757	up	0.373105	0.459611	no
Jr13_19940_p1	108988513	Q56WN1	VIT_14s0006g00350	Glutamine synthetase cytosolic isozyme 1-1	39123	2.35364e+07	2.36819e+07	1.95035e+07	1.85064e+07	1.83484e+07	2.03673e+07	2.22406e+07	1.9074e+07	1.16601	0.221586	up	0.0976701	0.146996	no
Jr02_19560_p1	109011198	Q8H1H9	VIT_02s0025g04560	Primary amine oxidase	82484	1.07916e+07	1.24143e+07	9.55331e+06	9.25368e+06	9.66294e+06	9.21533e+06	1.09197e+07	9.37732e+06	1.16448	0.219689	up	0.107143	0.158859	no
Jr15_08480_p1 (+1)	109012206	Q9FZ89	VIT_16s0039g00300	UPF0426 protein At1g28150, chloroplastic	16946	238168	100359	167511	115691	123287	195593	168679	144857	1.16446	0.219656	up	0.544809	0.628573	no
Jr04_00250_p1	108990002	O04499	VIT_08s0056g00200	2,3-bisphosphoglycerate-independent phosphoglycerate mutase 1 (BPG-independent PGAM 1; Phosphoglyceromutase 1)	61322	8.33874e+07	8.83667e+07	9.05419e+07	7.99456e+07	7.42211e+07	7.10972e+07	8.7432e+07	7.5088e+07	1.16439	0.21958	up	0.0734943	0.115571	no
Jr07_27210_p1	109001955	Q9LJH5	VIT_09s0002g00820	Peroxisomal (S)-2-hydroxy-acid oxidase GLO4	39769	2.62058e+06	2.49018e+06	2.65606e+06	2.31582e+06	2.42478e+06	1.92995e+06	2.58894e+06	2.22351e+06	1.16435	0.219519	up	0.117814	0.172661	no
Jr12_11110_p1 (+1)	108994805	P31265	VIT_05s0020g01170	Translationally-controlled tumor protein 1 (TCTP1)	25754	1.07157e+07	1.04314e+07	1.06523e+07	9.69812e+06	8.58378e+06	9.03707e+06	1.05998e+07	9.10632e+06	1.164	0.219094	up	0.0567029	0.0926107	low
Jr02_14220_p1_family	109004016	Q94B60	VIT_12s0028g01250	ATP-dependent Clp protease proteolytic subunit 4, chloroplastic	33814	6.81134e+06	6.5598e+06	7.00693e+06	5.27323e+06	5.90083e+06	6.33763e+06	6.79269e+06	5.83723e+06	1.16368	0.218699	up	0.0778425	0.121539	no
Jr15_06370_p1 (+1)	108991739	Q8L5U0	VIT_18s0001g12250	COP9 signalosome complex subunit 4 (AtS4; Signalosome subunit 4)	44934	1.1393e+06	1.03203e+06	1.17556e+06	808257	1.06503e+06	1.00285e+06	1.11563e+06	958714	1.16367	0.218688	up	0.177932	0.246103	no
Jr13_28800_p1_family	109007972	F4HXZ1	VIT_01s0011g04520	Vacuolar-sorting protein BRO1	97629	2.42332e+06	2.7935e+06	2.68283e+06	2.34263e+06	2.35798e+06	2.08919e+06	2.63322e+06	2.26327e+06	1.16346	0.218418	up	0.0984979	0.148106	no
Jr16_05790_p1	109007573	Q8LDQ4	VIT_16s0098g01760	PP2A regulatory subunit TAP46	45023	234201	227370	240597	206520	187095	210361	234056	201325	1.16258	0.217326	up	0.20759	0.280877	no
Jr09_12260_p1 (+3)	108984797	F4JLI5	VIT_02s0241g00080	Xanthine dehydrogenase 2 (AtXDH2)	38273	80134.5	81608.3	84657.7	69993.2	69312.3	72715.6	82133.5	70673.7	1.16215	0.216796	up	0.263838	0.343719	no
Jr06_04110_p1	109020493	O80983	VIT_04s0008g01170	ATP-dependent zinc metalloprotease FTSH 4, mitochondrial (AtFTSH4)	77404	199540	209549	179225	136055	187732	183077	196105	168955	1.16069	0.214988	up	0.305134	0.388309	no
Jr03_09580_p1	108985418	Q93VA3	VIT_01s0011g01850	Cytochrome c6, chloroplastic	19331	346838	293265	262099	246336	238211	292749	300734	259099	1.16069	0.214984	up	0.270404	0.351025	no
Jr07_38360_p1	108991872	Q8L5Z7	VIT_13s0067g01990	Sorting nexin 2A	59275	938578	929319	1.0212e+06	771684	845971	872287	963031	829981	1.16031	0.214504	up	0.128898	0.185929	no
Jr03_01410_p1	109021763	Q9LFA4	VIT_08s0007g03630	IQ domain-containing protein IQM3	62668	54159.1	61041.4	54340.7	42315.1	59434	44542.7	56513.7	48763.9	1.15892	0.212786	up	0.360735	0.446986	no
Jr01_08660_p1	108988099	Q56WN1	VIT_14s0006g00350	Glutamine synthetase cytosolic isozyme 1-1	43410	1.68037e+07	1.34927e+07	1.50486e+07	1.23657e+07	1.30578e+07	1.37272e+07	1.5115e+07	1.30502e+07	1.15822	0.211909	up	0.109228	0.161731	no
Jr10_21380_p1	108991122	Q8RXE7	VIT_11s0016g04210	Probable ADP-ribosylation factor GTPase-activating protein AGD14 (ARF GAP AGD14)	78599	103382	83025.7	92336.2	80023.1	81983.4	78820.3	92914.8	80275.6	1.15745	0.210947	up	0.298162	0.380612	no
Jr03_09620_p1	108985421	Q94F00	VIT_01s0011g01800	Phosphatase IMPL1, chloroplastic	48588	4.76687e+06	4.69251e+06	4.60078e+06	4.26878e+06	3.94893e+06	3.9333e+06	4.68672e+06	4.05033e+06	1.15712	0.210538	up	0.063102	0.101406	no
Jr02_20460_p1	109011928	O65355	VIT_19s0014g00980	Gamma-glutamyl hydrolase 2 (AtGGH2)	42444	6.6165e+06	7.57079e+06	7.11803e+06	5.84243e+06	6.37988e+06	6.19101e+06	7.10177e+06	6.13777e+06	1.15706	0.210464	up	0.0774634	0.121119	no
Jr13_02390_p1	108983122	Q9C7Z9	VIT_03s0088g00260	Serine carboxypeptidase-like 18	55342	3.38629e+06	3.71299e+06	3.04148e+06	3.09921e+06	2.87283e+06	2.80927e+06	3.38026e+06	2.9271e+06	1.15481	0.207658	up	0.118894	0.173878	no
Jr04_17420_p1	#N/A	Q84WK5	VIT_10s0116g00670	Protein GID8 homolog	36352	1.28056e+06	1.39766e+06	1.47358e+06	1.25841e+06	1.18092e+06	1.15595e+06	1.38393e+06	1.19843e+06	1.15479	0.207631	up	0.12856	0.185599	no
Jr07_16420_p1 (+1)	109020905	Q93YP4	VIT_05s0124g00040	Clathrin interactor EPSIN 3	96969	864988	1.02731e+06	848820	642527	878540	853610	913705	791559	1.15431	0.207032	up	0.252683	0.330756	no
Jr16_00380_p1	109004495	Q9SUT5	VIT_16s0050g01510	Protein SGT1 homolog B (AtSGT1b)	44355	4.15573e+07	4.48703e+07	4.10116e+07	3.81963e+07	3.56515e+07	3.6619e+07	4.24798e+07	3.68222e+07	1.15364	0.206199	up	0.0799624	0.124202	no
Jr12_21900_p1	109008967	Q9LZG0	VIT_13s0019g04480	Adenosine kinase 2 (AK 2)	37401	3.84788e+07	4.21293e+07	4.09915e+07	3.71989e+07	3.43167e+07	3.39159e+07	4.05332e+07	3.51438e+07	1.15335	0.205834	up	0.084692	0.13032	no
Jr08_04590_p1	109022161	Q9LVC8	VIT_16s0039g01590	2-methoxy-6-polyprenyl-1,4-benzoquinol methylase, mitochondrial	32531	841276	866146	861027	867540	708429	651780	856149	742583	1.15293	0.205311	up	0.205086	0.27806	no
Jr11_03040_p1	109003680	F4J7A7	VIT_14s0060g02430	PsbP domain-containing protein 7, chloroplastic	33072	380649	266090	383668	258337	309909	325707	343469	297984	1.15264	0.204945	up	0.338622	0.423889	no
Jr14_10110_p1_family	109014707	Q9LNW0	VIT_13s0019g03160	17.8 kDa class I heat shock protein	18181	634740	832753	486159	370409	1.00192e+06	322711	651217	565014	1.15257	0.204852	up	0.646986	0.721428	no
Jr01_34370_p1 (+1)	109011863	Q9S7M9	VIT_12s0057g01220	Transmembrane emp24 domain-containing protein p24beta2	24757	1.70782e+06	1.59463e+06	1.5871e+06	1.29656e+06	1.6714e+06	1.27952e+06	1.62985e+06	1.41583e+06	1.15117	0.203096	up	0.198257	0.270246	no
Jr10_16100_p1	108993885	O23193	VIT_07s0031g00200	CBS domain-containing protein CBSX1, chloroplastic	25684	1.5908e+06	1.59878e+06	1.48366e+06	1.17538e+06	1.39405e+06	1.49146e+06	1.55775e+06	1.35363e+06	1.15079	0.202626	up	0.170998	0.237709	no
Jr13_03930_p1 (+1)	108984990	Q94A52	VIT_06s0080g00550	Eukaryotic initiation factor 4A-III homolog (AteIF4AIII; eIF-4A-III; eIF4A-III)	46399	1.05494e+06	989570	1.15389e+06	666221	1.05194e+06	1.06267e+06	1.06614e+06	926943	1.15016	0.201838	up	0.3408	0.425806	no
Jr13_24620_p1	108996614	Q9SRH6	VIT_09s0002g01630	Hypersensitive-induced response protein 3 (AtHIR3)	46344	441753	424979	447406	435753	345855	362109	438046	381239	1.14901	0.200386	up	0.231041	0.306443	no
Jr03_22600_p1	109014339	Q9LZ08	VIT_08s0040g02980	Protein MODIFIER OF SNC1 11	26857	1.21175e+06	1.05271e+06	1.18046e+06	935991	1.0859e+06	976967	1.14831e+06	999620	1.14874	0.200056	up	0.168151	0.234543	no
Jr06_10100_p1	109017737	Q42593	VIT_18s0001g02470	L-ascorbate peroxidase T, chloroplastic	46108	1.98138e+07	2.07825e+07	1.97906e+07	1.77943e+07	1.71726e+07	1.76313e+07	2.0129e+07	1.75327e+07	1.14808	0.199222	up	0.0739863	0.116234	no
Jr04_15790_p1	109011296	Q9XF57	VIT_10s0003g01320	Peroxisome biogenesis protein 7	35779	167821	167805	281972	126491	218607	192928	205866	179342	1.1479	0.198994	up	0.517668	0.604518	no
Jr14_02080_p1	109012302	Q9LHI0	VIT_13s0084g00610	NADH dehydrogenase [ubiquinone] 1 alpha subcomplex subunit 6	14988	8.70093e+06	8.38071e+06	8.60691e+06	6.39039e+06	6.20359e+06	9.78895e+06	8.56285e+06	7.46097e+06	1.14769	0.198727	up	0.306862	0.389756	no
Jr03_00100_p1	109000410	Q6NKW9	VIT_08s0007g07560	Glucan endo-1,3-beta-glucosidase 8	52878	49163.7	45323.4	92312	39004	68594.3	55262.4	62266.4	54286.9	1.14699	0.197848	up	0.58114	0.662094	no
Jr02_16670_p1	109020393	Q39258	VIT_02s0025g01000	V-type proton ATPase subunit E1 (V-ATPase subunit E1)	26368	7.91073e+06	8.68927e+06	7.78109e+06	7.20344e+06	7.43837e+06	6.61571e+06	8.12703e+06	7.08584e+06	1.14694	0.197789	up	0.0999803	0.149585	no
Jr13_22490_p1	109003981	Q8H1S4	VIT_01s0011g05650	1-aminocyclopropane-1-carboxylate oxidase homolog 3	43758	1.55925e+06	1.50396e+06	1.31331e+06	1.25903e+06	1.38559e+06	1.17166e+06	1.45884e+06	1.27209e+06	1.1468	0.197619	up	0.17894	0.247394	no
Jr14_10290_p1	108998481	Q9SYG4	VIT_06s0004g05480	Oligouridylate-binding protein 1A (AtUBP1a)	35900	8.1069e+06	8.72126e+06	8.81901e+06	7.57187e+06	7.06931e+06	7.72468e+06	8.54905e+06	7.45529e+06	1.14671	0.197501	up	0.0871136	0.133515	no
Jr14_10500_p1	108990496	F4J8K6	VIT_06s0004g05210	rRNA biogenesis protein RRP5	42928	209935	205431	217194	190326	176351	184962	210853	183880	1.14669	0.197478	up	0.252029	0.330162	no
Jr01_30660_p1	108995639	Q39224	VIT_11s0118g00360	Protein SRG1 (AtSRG1)	38802	992053	1.38135e+06	1.03072e+06	1.38125e+06	815826	771947	1.13471e+06	989675	1.14655	0.197295	up	0.458074	0.546044	no
Jr14_08340_p1	108996855	O64732	VIT_06s0004g07250	UDP-glycosyltransferase 87A1	51411	1.0188e+06	1.20772e+06	918238	989419	832270	921769	1.04825e+06	914486	1.14628	0.196953	up	0.232312	0.307881	no
Jr01_00650_p1	108992824	Q38879	VIT_14s0066g02560	Thioredoxin H2 (AtTrxh2)	15062	910188	1.05359e+06	966268	745836	886918	923588	976682	852114	1.14619	0.196842	up	0.205557	0.278583	no
Jr02_08980_p1	#N/A	Q8LE58	VIT_09s0002g02600	ESCRT-related protein CHMP1A	22666	4.77933e+06	4.88004e+06	4.632e+06	4.31891e+06	3.91134e+06	4.23922e+06	4.76379e+06	4.15649e+06	1.14611	0.196743	up	0.0860369	0.132204	no
Jr11_03960_p1	109011306	Q96321	VIT_14s0060g01510	Importin subunit alpha-1 (IMPa-1)	58653	1.05753e+06	1.27242e+06	1.19109e+06	986974	1.04201e+06	1.04364e+06	1.17368e+06	1.02421e+06	1.14594	0.196527	up	0.168083	0.234543	no
Jr13_14410_p1 (+1)	109014375	Q9LMX4	VIT_01s0011g00470	Probable inactive purple acid phosphatase 1	69195	373117	380898	366199	250688	377784	349683	373405	326051	1.14523	0.19564	up	0.334546	0.420062	no
Jr04_21000_p1	109013543	Q9C5R8	VIT_08s0007g02490	2-Cys peroxiredoxin BAS1-like, chloroplastic (2-Cys Prx B; 2-Cys peroxiredoxin B)	29717	5.91136e+06	4.51079e+06	5.43555e+06	3.82012e+06	4.31558e+06	5.72374e+06	5.2859e+06	4.61981e+06	1.14418	0.194315	up	0.303749	0.386696	no
Jr01_31370_p1	108996027	Q9LTY6	VIT_07s0141g00310	Probable uracil phosphoribosyltransferase (UK; UPRTase)	33792	2.91766e+06	3.21807e+06	2.84937e+06	2.88969e+06	2.48184e+06	2.48792e+06	2.99503e+06	2.61982e+06	1.14322	0.193105	up	0.148195	0.210539	no
Jr16_21500_p1	109009921	O80977	VIT_03s0091g00740	Vacuolar-sorting receptor 3 (AtVSR3)	69632	205356	182363	205293	147332	184119	187307	197671	172919	1.14314	0.193001	up	0.322074	0.40657	no
Jr10_03830_p1	109010186	Q7DLS1	VIT_01s0137g00420	Proteasome subunit beta type-7-B	29494	1.75105e+07	2.0429e+07	1.77709e+07	1.75252e+07	1.56453e+07	1.5571e+07	1.85701e+07	1.62472e+07	1.14298	0.192796	up	0.133038	0.191232	no
Jr01_13260_p1	108996394	P51419	VIT_01s0011g01820	60S ribosomal protein L27-3	15633	598448	627941	923980	533246	705298	643294	716790	627279	1.1427	0.192441	up	0.382478	0.468589	no
Jr13_30550_p1	109010844	Q9LK73	VIT_16s0050g01580	UDP-glycosyltransferase 88A1	52209	80468.2	79926.2	86367.5	74119	70868.9	70968.4	82254	71985.5	1.14265	0.19238	up	0.323705	0.408005	no
Jr03_08710_p1 (+3)	109011284	Q94K75	VIT_10s0003g01530	Rho-N domain-containing protein 1, chloroplastic	33319	65301.4	107638	86924.2	92224.1	63667.7	71598.7	86621.3	75830.2	1.14231	0.191948	up	0.480627	0.567795	no
Jr03_12020_p1	108992748	O81439	VIT_02s0012g02050	Probable plastid-lipid-associated protein 1, chloroplastic (AtPap1)	38919	6.31946e+07	6.26016e+07	5.03831e+07	5.73698e+07	4.8654e+07	4.82821e+07	5.87264e+07	5.14353e+07	1.14175	0.191251	up	0.203443	0.276173	no
Jr14_21390_p1	109001679	Q9C523	VIT_08s0007g06930	Dirigent protein 19 (AtDIR19)	21673	3.63046e+06	4.40786e+06	4.94782e+06	3.85754e+06	3.82729e+06	3.70767e+06	4.32871e+06	3.7975e+06	1.13989	0.188888	up	0.19823	0.270246	no
Jr13_30330_p1	109010861	Q9SXA0	VIT_16s0050g02270	Putative F-box protein At1g47730	19321	1.1332e+06	896858	1.08143e+06	895038	899346	936386	1.03716e+06	910257	1.13941	0.188292	up	0.214541	0.288506	no
Jr01_09700_p1 (+1)	108988199	Q9FJ62	VIT_14s0083g01010	Glycerophosphodiester phosphodiesterase GDPDL4	28396	1.36215e+07	1.27947e+07	1.43388e+07	1.13327e+07	1.10863e+07	1.33553e+07	1.3585e+07	1.19248e+07	1.13923	0.188057	up	0.150061	0.212823	no
Jr01_09270_p1	108988092	Q9M8R4	VIT_04s0079g00800	Protein DJ-1 homolog D (AtDJ1D)	45818	2.18034e+06	2.09439e+06	2.46328e+06	1.7864e+06	2.23833e+06	1.89002e+06	2.24601e+06	1.97158e+06	1.13919	0.188006	up	0.208254	0.281545	no
Jr11_27630_p1	109009542	Q8LD27	VIT_11s0065g00320	Proteasome subunit beta type-6	25506	3.67345e+07	3.50931e+07	3.76052e+07	3.24325e+07	3.12839e+07	3.23544e+07	3.64776e+07	3.20236e+07	1.13909	0.187875	up	0.0997414	0.149363	no
Jr11_05400_p1	108997711	O82399	VIT_00s0373g00040	Malate dehydrogenase 1, peroxisomal	37416	2.42028e+07	2.40936e+07	2.28554e+07	2.04208e+07	2.03571e+07	2.17031e+07	2.37173e+07	2.0827e+07	1.13878	0.187486	up	0.0996667	0.149363	no
Jr_Scaffold_25922_00090_p1 (+1)	108996938	Q9ZVQ3	VIT_12s0035g02100	Glutathione S-transferase Z1 (AtGSTZ1)	25372	480500	494565	485447	491245	428426	363564	486837	427745	1.13815	0.186688	up	0.27787	0.35888	no
Jr10_01900_p1	#N/A	Q9FKA5	VIT_14s0108g01160	Uncharacterized protein At5g39570	43155	3.79858e+06	4.49087e+06	3.54946e+06	3.42468e+06	3.35572e+06	3.62486e+06	3.9463e+06	3.46842e+06	1.13778	0.186223	up	0.173601	0.240922	no
Jr11_16160_p1 (+1)	#N/A	Q9S834	VIT_07s0005g01530	ATP-dependent Clp protease proteolytic subunit 5, chloroplastic	33708	4.82906e+06	4.72896e+06	4.63001e+06	4.06088e+06	3.80499e+06	4.6152e+06	4.72934e+06	4.16036e+06	1.13676	0.184932	up	0.139817	0.200016	no
Jr10_09160_p1_family	109021950	P49107	VIT_04s0044g01410	Photosystem I reaction center subunit N, chloroplastic (PSI-N)	18754	6.35375e+07	4.32252e+07	4.1099e+07	3.55145e+07	3.15955e+07	6.2967e+07	4.92872e+07	4.3359e+07	1.13672	0.184883	up	0.536602	0.621885	no
Jr13_06840_p1	109020162	Q94B35	VIT_03s0063g02030	4-hydroxy-3-methylbut-2-enyl diphosphate reductase, chloroplastic	57776	6.56264e+06	6.90023e+06	6.24432e+06	5.76512e+06	6.15066e+06	5.43716e+06	6.56906e+06	5.78431e+06	1.13567	0.183542	up	0.122498	0.178367	no
Jr05_04790_p1 (+2)	#N/A	Q9FPT1	VIT_13s0073g00610	Ubiquitin carboxyl-terminal hydrolase 12	131664	339998	344402	443836	304679	386798	302409	376079	331295	1.13518	0.182918	up	0.360086	0.44635	no
Jr01_16350_p1	109013257	Q0WV13	VIT_07s0031g01190	Probable galacturonosyltransferase 13	71145	7.15976e+06	6.84708e+06	7.63223e+06	5.68363e+06	6.76562e+06	6.61962e+06	7.21303e+06	6.35629e+06	1.13479	0.182419	up	0.152076	0.215125	no
Jr13_04270_p1	108981258	Q9SZC9	VIT_12s0142g00420	Copper-transporting ATPase PAA1, chloroplastic	22080	161914	121833	136160	117202	131918	121028	139969	123383	1.13443	0.181965	up	0.375105	0.461604	no
Jr03_02200_p1	#N/A	Q9SIH1	VIT_08s0007g02900	Peptidyl-prolyl cis-trans isomerase CYP18-2 (PPIase CYP18-2)	18218	1.04315e+06	909659	924258	947002	770334	820805	959021	846047	1.13353	0.180825	up	0.241387	0.318118	no
Jr14_10360_p1	108998463	P0DKI3	VIT_13s0019g02180	Tropinone reductase homolog At1g07440	31073	666563	597356	779954	490573	693061	619473	681291	601036	1.13353	0.180821	up	0.348677	0.434003	no
Jr03_00350_p1	109005694	Q56WN1	VIT_08s0007g04670	Glutamine synthetase cytosolic isozyme 1-1	93541	121616	130402	132684	136315	111417	91695.4	128234	113142	1.13339	0.180642	up	0.415576	0.503581	no
Jr07_03810_p1	108995347	O82663	VIT_04s0023g01650	Succinate dehydrogenase [ubiquinone] flavoprotein subunit 1, mitochondrial	70066	2.9351e+07	3.04673e+07	3.042e+07	2.79242e+07	2.65231e+07	2.5198e+07	3.00794e+07	2.65485e+07	1.133	0.180149	up	0.120045	0.174997	no
Jr06_20660_p1 (+2)	108982293	Q9LDX1	VIT_07s0130g00190	Protein SUPPRESSOR OF GENE SILENCING 3 (AtSGS3)	81955	1.0852e+06	1.09664e+06	1.13515e+06	1.00112e+06	1.0071e+06	921023	1.10566e+06	976414	1.13237	0.179348	up	0.180409	0.249216	no
Jr15_07980_p1	108981610	Q67XD9	VIT_18s0072g01040	Alkaline/neutral invertase CINV2	63530	395532	437171	490230	331345	448751	388192	440978	389429	1.13237	0.179345	up	0.337323	0.422744	no
Jr14_22400_p1	109003780	Q9SKZ1	VIT_06s0004g00040	Transcription factor Pur-alpha 1	32039	3.18499e+06	3.12318e+06	4.06038e+06	2.77721e+06	3.37858e+06	3.00223e+06	3.45618e+06	3.05267e+06	1.13218	0.179107	up	0.256689	0.335333	no
Jr01_04150_p1	108992876	Q9SSA5	VIT_14s0066g01410	Peptidyl-prolyl cis-trans isomerase CYP38, chloroplastic (PPIase CYP38)	47848	1.93041e+07	1.91229e+07	1.64129e+07	1.59968e+07	1.61616e+07	1.63728e+07	1.828e+07	1.61771e+07	1.12999	0.176314	up	0.15115	0.214091	no
Jr08_12040_p1	108980659	Q9M015	VIT_07s0005g00670	Uncharacterized protein At5g01610	18282	307371	284099	309003	265774	277757	253464	300158	265665	1.12983	0.176112	up	0.284702	0.366697	no
Jr11_27140_p1	109009507	Q8RXP6	VIT_04s0008g03680	Alpha/beta hydrolase domain-containing protein WAV2	48245	8.14809e+06	9.5923e+06	9.21998e+06	9.16939e+06	7.81964e+06	6.88455e+06	8.98679e+06	7.95786e+06	1.1293	0.175426	up	0.241181	0.317973	no
Jr06_10180_p1	108994690	Q9M9A8	VIT_18s0001g02420	Aspartyl protease APCB1	46199	457850	421865	413116	426819	372912	345129	430944	381620	1.12925	0.175362	up	0.290917	0.373389	no
Jr02_17220_p1	108983878	Q9CAK8	VIT_02s0025g00380	2-C-methyl-D-erythritol 2,4-cyclodiphosphate synthase, chloroplastic (MECDP-synthase; MECPS; MECS)	24167	1.28395e+06	1.17536e+06	1.15956e+06	912509	1.06527e+06	1.22763e+06	1.20629e+06	1.06847e+06	1.12899	0.17503	up	0.277523	0.358572	no
Jr02_18840_p1	108990688	Q9S9T0	VIT_02s0025g04640	F-box/kelch-repeat protein At4g05080	81934	227764	246543	212945	183316	225896	199532	229084	202914	1.12897	0.175006	up	0.344777	0.429798	no
Jr02_19720_p1	109011291	Q8VWG7	VIT_00s0323g00030	TPR repeat-containing thioredoxin TDX	48669	1.571e+07	1.47657e+07	1.87905e+07	1.32963e+07	1.48275e+07	1.55258e+07	1.6422e+07	1.45498e+07	1.12867	0.174629	up	0.22193	0.296506	no
Jr15_06930_p1 (+1)	108986742	Q9ZT96	VIT_18s0072g01130	Transcription termination factor MTERF4, chloroplastic	24501	162389	265672	205450	194510	226064	141003	211170	187192	1.12809	0.173886	up	0.520663	0.607256	no
Jr11_28430_p1	109009608	Q9M084	VIT_04s0008g03010	Aspartate--tRNA ligase 2, cytoplasmic	64657	4.87485e+06	4.86906e+06	5.19979e+06	4.63042e+06	4.82004e+06	3.79723e+06	4.98123e+06	4.4159e+06	1.12802	0.173797	up	0.200248	0.272396	no
Jr14_09360_p1	109009002	P32069	VIT_06s0004g06320	Anthranilate synthase alpha subunit 2, chloroplastic	65778	271473	271054	251034	233603	236000	234602	264520	234735	1.12689	0.172347	up	0.297984	0.380533	no
Jr04_02020_p1	108984218	Q9LMX4	VIT_08s0007g01660	Probable inactive purple acid phosphatase 1	47353	38367	63999	39702.4	70764.8	29756.5	25569	47356.1	42030.1	1.12672	0.172127	up	0.695409	0.763514	no
Jr05_05290_p1	109012612	Q9SV68	VIT_07s0151g00090	Chloroplast envelope quinone oxidoreductase homolog (ceQORH)	35331	882043	713048	852130	709638	709177	753222	815740	724012	1.12669	0.172096	up	0.259499	0.338693	no
Jr06_14250_p1 (+1)	108979811	Q9LY84	VIT_14s0066g01270	GDSL esterase/lipase At5g14450	42229	750958	935625	901503	845612	773007	681149	862695	766589	1.12537	0.170397	up	0.302526	0.385586	no
Jr01_08390_p1	108988174	Q8LE52	VIT_14s0006g00630	Glutathione S-transferase DHAR3, chloroplastic	31884	260297	232527	198661	216036	174455	224169	230495	204887	1.12499	0.169911	up	0.406318	0.494361	no
Jr01_12410_p2 (+1)	#N/A	Q9LTE3	VIT_16s0050g00140	Heavy metal-associated isoprenylated plant protein 12 (AtHIP12)	11900	4.3624e+06	4.88705e+06	4.99907e+06	4.16546e+06	4.27305e+06	4.22831e+06	4.74951e+06	4.22227e+06	1.12487	0.169758	up	0.149316	0.211919	no
Jr07_00570_p1	109002461	P36210	VIT_00s1232g00020	50S ribosomal protein L12-1, chloroplastic	22730	292459	344902	337829	310020	268949	288807	325063	289259	1.12378	0.168361	up	0.32764	0.412018	no
Jr01_27680_p1	108987247	Q9SZE1	VIT_11s0016g03100	Probable 3-hydroxyisobutyrate dehydrogenase-like 1, mitochondrial (HIBADH-like)	36300	3.75599e+06	3.87444e+06	3.7766e+06	3.50085e+06	3.18255e+06	3.46733e+06	3.80234e+06	3.38358e+06	1.12376	0.16834	up	0.149359	0.211919	no
Jr09_13490_p1_family	108992417	Q84VW9	VIT_19s0014g01390	Phosphoenolpyruvate carboxylase 3 (AtPPC3; PEPC 3; PEPCase 3)	110254	1.47748e+06	1.27261e+06	1.65569e+06	1.4025e+06	1.55539e+06	963333	1.4686e+06	1.30707e+06	1.12358	0.168097	up	0.430897	0.519472	no
Jr02_23730_p1	108983716	Q9C6I6	VIT_19s0177g00220	Electron transfer flavoprotein subunit alpha, mitochondrial (Alpha-ETF)	40552	6.99316e+06	7.27896e+06	6.96402e+06	6.55029e+06	6.06085e+06	6.29204e+06	7.07871e+06	6.30106e+06	1.12342	0.167893	up	0.13383	0.192195	no
Jr04_19650_p1	109020749	Q8S9M1	VIT_08s0007g06480	Probable plastid-lipid-associated protein 13, chloroplastic	34372	2.25419e+07	1.69399e+07	1.64859e+07	1.48235e+07	1.48087e+07	2.01971e+07	1.86559e+07	1.66098e+07	1.12319	0.167599	up	0.379568	0.46629	no
Jr08_00420_p1	109000979	Q56Z59	VIT_18s0041g00430	Patellin-3	71548	943853	1.10403e+06	811120	1.26146e+06	712342	575316	953000	849706	1.12156	0.165512	up	0.584155	0.664839	no
Jr05_01670_p1	108989366	Q8H0X6	VIT_13s0084g00050	Cysteine proteinase inhibitor 6 (AtCYS-6)	23396	1.2637e+07	1.26964e+07	1.17543e+07	1.13938e+07	1.02676e+07	1.14125e+07	1.23626e+07	1.10246e+07	1.12136	0.165251	up	0.160348	0.225088	no
Jr16_21910_p1	109013564	O49485	VIT_03s0180g00130	D-3-phosphoglycerate dehydrogenase 1, chloroplastic	69406	9.28464e+06	1.0789e+07	1.01509e+07	1.00501e+07	8.79032e+06	8.12142e+06	1.00749e+07	8.98729e+06	1.12101	0.164802	up	0.223956	0.29885	no
Jr16_00750_p1	109014173	Q9S7E9	VIT_16s0050g02450	Glutamate--glyoxylate aminotransferase 2 (AtGGT2)	24731	471327	552537	561032	370062	510738	533761	528298	471520	1.12041	0.164033	up	0.403619	0.49144	no
Jr07_11360_p1	108979233	F4JLP5	VIT_05s0077g01210	Dihydrolipoyl dehydrogenase 2, chloroplastic (ptLPD2)	66886	2.95677e+06	3.24937e+06	3.11444e+06	2.80112e+06	2.68207e+06	2.83929e+06	3.10686e+06	2.77416e+06	1.11993	0.163408	up	0.171628	0.238384	no
Jr13_11190_p1	108997484	Q67YC9	VIT_01s0150g00270	Uncharacterized protein At4g14100	25053	1.65555e+06	2.16895e+06	1.87887e+06	1.84371e+06	1.78197e+06	1.46749e+06	1.90113e+06	1.69773e+06	1.11981	0.16325	up	0.323544	0.407958	no
Jr04_19000_p1	#N/A	Q94A08	VIT_08s0007g08310	Probable galactinol--sucrose galactosyltransferase 2	84258	109514	109705	203474	69466.4	168269	139812	140898	125849	1.11958	0.162953	up	0.682193	0.751758	no
Jr10_21670_p1	109011222	Q9C5U3	VIT_04s0008g04690	26S proteasome regulatory subunit 8 homolog A	47346	623903	667740	568984	582191	522573	557725	620209	554163	1.11918	0.162443	up	0.283169	0.364913	no
Jr14_22060_p1	109003605	Q94BS2	VIT_06s0004g00260	Protein MET1, chloroplastic	36862	5.1195e+06	4.39296e+06	4.30422e+06	3.79044e+06	4.13917e+06	4.43064e+06	4.60556e+06	4.12009e+06	1.11783	0.160703	up	0.227293	0.302201	no
Jr03_17960_p1	108980074	Q9SPE5	VIT_10s0092g00120	Gamma-soluble NSF attachment protein (Gamma-SNAP)	32916	734463	779267	747571	697542	682274	643661	753767	674492	1.11753	0.160316	up	0.24805	0.325856	no
Jr05_09900_p1	109009065	Q9FF55	VIT_06s0004g02890	Protein disulfide isomerase-like 1-4 (AtPDIL1-4)	63489	5.66338e+06	5.37424e+06	5.92769e+06	5.32407e+06	4.93385e+06	4.92669e+06	5.6551e+06	5.06154e+06	1.11727	0.159977	up	0.167179	0.233583	no
Jr10_09540_p1	108983388	Q9FN05	VIT_16s0039g01030	Probable glucan 1,3-alpha-glucosidase	110285	647574	613929	661756	662491	606221	452837	641086	573850	1.11717	0.159846	up	0.38728	0.473821	no
Jr16_11880_p1	109009258	P42815	VIT_01s0026g02520	Ribonuclease 3	25964	578523	645814	733471	657370	628390	467253	652603	584338	1.11682	0.159402	up	0.407297	0.495005	no
Jr09_05170_p1	108994370	Q9SMN1	VIT_17s0000g01240	Gamma carbonic anhydrase-like 2, mitochondrial (AtCAL2; GAMMA CAL2)	27663	1.08856e+07	9.99733e+06	1.01976e+07	9.73441e+06	8.79719e+06	9.30007e+06	1.03602e+07	9.27722e+06	1.11673	0.159284	up	0.169419	0.236112	no
Jr03_04870_p1 (+2)	#N/A	Q9SS44	VIT_08s0007g08860	Transcription initiation factor IIB-2	34119	172452	216051	193467	139003	198089	184288	193990	173793	1.11621	0.15861	up	0.466195	0.554121	no
Jr12_19730_p1 (+2)	108993189	Q9SSB8	VIT_09s0002g06000	Cytochrome c oxidase subunit 5b-2, mitochondrial (AtCOX5b-2)	21555	1.13227e+07	1.01755e+07	1.20523e+07	1.04326e+07	9.24398e+06	1.03972e+07	1.11835e+07	1.00246e+07	1.11561	0.157826	up	0.215937	0.28991	no
Jr11_17150_p1 (+1)	109007777	Q9LW07	VIT_07s0005g02590	Probable polygalacturonase At3g15720 (PG)	53197	426638	437798	468823	449831	394504	350832	444420	398389	1.11554	0.157746	up	0.349545	0.434755	no
Jr16_03720_p1 (+3)	108984897	Q84XU2	VIT_00s2851g00010	Serine/threonine-protein phosphatase 5	48662	594216	784323	669759	618111	632286	586579	682766	612325	1.11504	0.157094	up	0.335427	0.421008	no
Jr02_22030_p1	109013191	Q9ZPI6	VIT_19s0014g02370	3-hydroxyacyl-CoA dehydrogenase	33824	1.8167e+06	1.90525e+06	1.77052e+06	1.65428e+06	1.65885e+06	1.61577e+06	1.83082e+06	1.64297e+06	1.11434	0.156187	up	0.208923	0.282102	no
Jr14_11470_p1	108992988	Q9LHA8	VIT_06s0004g04510	Probable mediator of RNA polymerase II transcription subunit 37c	95200	624458	713632	476029	670139	500042	458321	604706	542834	1.11398	0.155723	up	0.489413	0.576933	no
Jr12_18640_p1	109007862	Q9LIG0	VIT_09s0002g03450	Clavaminate synthase-like protein At3g21360	40529	4.49333e+06	4.33432e+06	4.36948e+06	3.7756e+06	3.95873e+06	4.11379e+06	4.39904e+06	3.94937e+06	1.11386	0.155567	up	0.170284	0.236816	no
Jr_Scaffold_25922_00050_p1	108996951	Q9ZVQ3	VIT_12s0035g02100	Glutathione S-transferase Z1 (AtGSTZ1)	25367	2.13357e+06	2.55439e+06	2.53905e+06	2.34116e+06	2.22853e+06	1.9203e+06	2.409e+06	2.16333e+06	1.11356	0.155183	up	0.294106	0.376748	no
Jr02_21200_p1	109012566	Q9ZP06	VIT_10s0003g01000	Malate dehydrogenase 1, mitochondrial	36005	4.37098e+07	4.47351e+07	4.36682e+07	4.1184e+07	3.73628e+07	4.01079e+07	4.40377e+07	3.95515e+07	1.11343	0.155005	up	0.183324	0.252713	no
Jr14_11740_p1	#N/A	O23629	VIT_06s0004g04250	Histone H2B.6	16206	21485.1	20969.8	22429.2	18463.1	18362	21458	21628	19427.7	1.11326	0.154788	up	0.472856	0.560825	no
Jr16_00060_p1 (+1)	109000900	Q9XH75	VIT_16s0050g00800	Sec-independent protein translocase protein TATB, chloroplastic	30164	1.4307e+06	1.65414e+06	1.22534e+06	1.29494e+06	1.26553e+06	1.31152e+06	1.43673e+06	1.29066e+06	1.11317	0.154672	up	0.3229	0.407458	no
Jr16_15220_p1	109006688	Q29Q26	VIT_03s0038g04270	Ankyrin repeat domain-containing protein 2B	37647	6.83331e+06	7.68424e+06	9.15221e+06	7.28222e+06	7.11806e+06	6.86592e+06	7.88992e+06	7.08874e+06	1.11302	0.154482	up	0.279836	0.360994	no
Jr01_08720_p1	108988014	Q9ZTP3	VIT_14s0030g02240	Protein EIN4 (AtEIN4)	16201	251995	205257	207934	142805	253644	201577	221729	199342	1.1123	0.15355	up	0.544645	0.628573	no
Jr04_15240_p1_family	#N/A	Q42134	VIT_09s0002g00350	Proteasome subunit alpha type-5-B	26083	5.22651e+07	5.44807e+07	5.05006e+07	4.94813e+07	4.47113e+07	4.72175e+07	5.24155e+07	4.71367e+07	1.11199	0.153142	up	0.198608	0.270612	no
Jr12_18570_p1	109007868	Q38905	VIT_09s0002g03250	Profilin-4	14092	1.154e+07	1.36105e+07	1.22929e+07	1.18772e+07	1.04617e+07	1.1342e+07	1.24811e+07	1.1227e+07	1.11171	0.152777	up	0.226838	0.301756	no
Jr15_09480_p1	108994589	Q9LS40	VIT_17s0000g03990	Protein ASPARTIC PROTEASE IN GUARD CELL 1 (AtASPG1)	53140	87331.3	84475.2	143997	122554	96135.3	65532.5	105268	94740.7	1.11112	0.15201	up	0.64219	0.718241	no
Jr02_20250_p1	109011716	O82616	VIT_19s0014g00180	Probable fructokinase-5	40677	2.10521e+06	2.08851e+06	2.07353e+06	1.90448e+06	1.88388e+06	1.85447e+06	2.08908e+06	1.88094e+06	1.11066	0.151414	up	0.207756	0.280986	no
Jr13_09360_p1	108993349	Q6NLP2	VIT_03s0038g02640	Translation initiation factor IF3-1, mitochondrial (AtIF3-1)	62638	9761.88	20603.1	10204.8	16088.2	10597.4	9853.52	13523.3	12179.7	1.11031	0.150958	up	0.688811	0.757278	no
Jr11_08490_p1	108980770	Q42560	VIT_00s0264g00030	Aconitate hydratase 1 (Aconitase 1)	98633	1.70388e+07	1.84112e+07	1.94779e+07	1.63633e+07	1.74777e+07	1.56341e+07	1.83093e+07	1.64917e+07	1.11021	0.150834	up	0.215761	0.289791	no
Jr06_04920_p1	108984825	Q9LZ82	VIT_04s0008g00820	Protein BTR1	72717	3.35592e+06	3.85034e+06	3.30335e+06	3.06841e+06	3.12431e+06	3.28327e+06	3.5032e+06	3.15866e+06	1.10908	0.14936	up	0.236567	0.312641	no
Jr16_04850_p1	109007514	Q9SRH6	VIT_09s0002g01630	Hypersensitive-induced response protein 3 (AtHIR3)	46687	1.05762e+07	1.103e+07	1.05671e+07	9.65141e+06	9.22054e+06	1.01558e+07	1.07244e+07	9.67591e+06	1.10836	0.148432	up	0.19023	0.260706	no
Jr16_15660_p1	109006649	Q9SII8	VIT_03s0038g03680	Ubiquitin domain-containing protein DSK2b	59460	1.86326e+06	1.79938e+06	1.95033e+06	1.6483e+06	1.71205e+06	1.70462e+06	1.87099e+06	1.68832e+06	1.10819	0.148212	up	0.234438	0.310325	no
Jr05_12380_p1 (+1)	108986488	Q9ZUX4	VIT_06s0080g00540	Uncharacterized protein At2g27730, mitochondrial	12504	6.67127e+06	7.77278e+06	7.23422e+06	6.37993e+06	6.35708e+06	6.831e+06	7.22609e+06	6.52267e+06	1.10784	0.147752	up	0.220785	0.295392	no
Jr04_03490_p1	108988418	O64470	VIT_11s0103g00200	Spermidine hydroxycinnamoyl transferase	51842	23283.4	25066.8	20750.5	35182.1	15141.5	12051.8	23033.6	20791.8	1.10782	0.147723	up	0.722459	0.784588	no
Jr01_07970_p1	108988153	Q9C8F1	VIT_14s0006g01990	Probable eukaryotic translation initiation factor 5-1 (eIF-5 1)	49227	392835	440139	446024	322121	422669	410213	426333	385001	1.10735	0.147118	up	0.410842	0.498944	no
Jr05_07930_p1	108985227	Q8LGG8	VIT_06s0004g05730	Universal stress protein A-like protein	17863	3.38575e+07	3.21613e+07	3.36639e+07	2.92526e+07	2.88529e+07	3.19814e+07	3.32276e+07	3.0029e+07	1.10652	0.146025	up	0.214354	0.288372	no
Jr03_23870_p1	109002672	O80934	VIT_08s0007g00530	Uncharacterized protein At2g37660, chloroplastic	27767	2.18836e+07	1.96673e+07	2.32815e+07	1.86805e+07	1.78776e+07	2.20411e+07	2.16108e+07	1.95331e+07	1.10637	0.145833	up	0.29722	0.379851	no
Jr13_05040_p1	109007056	Q94AM9	VIT_12s0055g00360	Polyadenylate-binding protein-interacting protein 4 (PABP-interacting protein 4; Poly(A)-binding protein-interacting protein 4)	49306	626946	624813	630332	639139	523576	538689	627364	567135	1.1062	0.14561	up	0.344577	0.429711	no
Jr16_15050_p1	109006707	P93008	VIT_03s0038g00010	DEAD-box ATP-dependent RNA helicase 21	82737	351188	358048	346073	334490	308475	311626	351770	318197	1.10551	0.144711	up	0.357631	0.443473	no
Jr05_14340_p1	108999274	O80934	VIT_06s0009g03780	Uncharacterized protein At2g37660, chloroplastic	37532	558867	792908	550207	569215	565101	586565	633994	573627	1.10524	0.144356	up	0.447474	0.536709	no
Jr13_04690_p1 (+1)	109007082	Q8RXF1	VIT_01s0011g02040	Probable splicing factor 3A subunit 1	89620	1.15172e+06	1.11151e+06	1.10905e+06	994267	1.01964e+06	1.03813e+06	1.12409e+06	1.01735e+06	1.10492	0.143948	up	0.269359	0.349806	no
Jr15_10010_p1 (+2)	109010670	Q15KI9	VIT_17s0000g03270	2-succinyl-6-hydroxy-2,4-cyclohexadiene-1-carboxylate synthase	46342	65337.2	56626	63314.4	57807.4	53603.9	56284.9	61759.2	55898.7	1.10484	0.143839	up	0.479738	0.566948	no
Jr09_00690_p1 (+1)	109011458	Q9SA73	VIT_19s0027g00500	Obg-like ATPase 1	46831	227805	186894	189971	216365	156572	174575	201557	182504	1.1044	0.143258	up	0.496728	0.583677	no
Jr08_20500_p1	108987759	O22263	VIT_12s0059g01560	Protein disulfide-isomerase like 2-1 (AtPDIL2-1)	41529	7.83891e+07	7.68861e+07	7.82556e+07	7.6566e+07	6.63492e+07	6.87864e+07	7.78436e+07	7.05672e+07	1.10311	0.14158	up	0.249711	0.327646	no
Jr11_13830_p1	108992145	O82261	VIT_07s0104g01240	Protease Do-like 2, chloroplastic	72751	93166.6	77018.5	88865.9	91559.2	72127.2	71276	86350.3	78320.8	1.10252	0.140807	up	0.520854	0.607264	no
Jr14_19890_p1	108998696	Q9C5J8	VIT_06s0004g01880	Outer envelope protein 80, chloroplastic	82449	2.13172e+06	2.10885e+06	2.13018e+06	1.72594e+06	2.01039e+06	2.04507e+06	2.12358e+06	1.92713e+06	1.10194	0.140044	up	0.291063	0.373431	no
Jr16_10690_p1	108989818	P52901	VIT_09s0018g01940	Pyruvate dehydrogenase E1 component subunit alpha-1, mitochondrial (PDHE1-A)	44044	4.98501e+07	5.10086e+07	4.74412e+07	4.60241e+07	4.25195e+07	4.60561e+07	4.94333e+07	4.48666e+07	1.10178	0.139842	up	0.236263	0.312425	no
Jr13_07370_p1	109011186	Q9FX83	VIT_03s0063g02550	NADH dehydrogenase [ubiquinone] iron-sulfur protein 8-B, mitochondrial	31806	984680	1.02312e+06	1.36455e+06	873124	1.20613e+06	982007	1.12412e+06	1.02042e+06	1.10162	0.139632	up	0.482546	0.569748	no
Jr14_00590_p1 (+2)	109001531	P40941	VIT_13s0064g01050	ADP,ATP carrier protein 2, mitochondrial	47886	1.72188e+06	1.78231e+06	2.14916e+06	1.90583e+06	1.77306e+06	1.45536e+06	1.88445e+06	1.71141e+06	1.10111	0.138955	up	0.40231	0.490209	no
Jr06_04940_p1 (+1)	108984828	Q9C992	VIT_04s0008g00810	3-ketoacyl-CoA synthase 7 (KCS-7)	14081	560779	537744	630729	457659	602390	510492	576418	523513	1.10106	0.138888	up	0.419854	0.508017	no
Jr09_09400_p1	108993774	Q6DR13	VIT_02s0025g02430	F-box/LRR-repeat protein At2g42720	38318	1.99867e+06	2.25251e+06	1.90377e+06	1.9526e+06	1.7716e+06	1.87074e+06	2.05165e+06	1.86498e+06	1.10009	0.137628	up	0.308302	0.391435	no
Jr06_07170_p1	108987625	Q9SX77	VIT_18s0001g10780	Succinate dehydrogenase subunit 5, mitochondrial	29762	1.97491e+07	2.14029e+07	1.86312e+07	1.91328e+07	1.68089e+07	1.84384e+07	1.99277e+07	1.81267e+07	1.09936	0.136661	up	0.272411	0.352935	no
Jr01_16190_p1	108982628	Q940M2	VIT_07s0031g01330	Alanine--glyoxylate aminotransferase 2 homolog 1, mitochondrial	51763	1.54988e+06	1.19421e+06	1.63366e+06	977652	1.49946e+06	1.50618e+06	1.45925e+06	1.32776e+06	1.09903	0.13623	up	0.535743	0.621764	no
Jr16_19500_p1 (+1)	109002276	Q9LU85	VIT_12s0034g01180	Probable plastid-lipid-associated protein 4, chloroplastic	25729	99713.4	83781.3	19807.4	46026.8	71427.3	67578	67767.3	61677.3	1.09874	0.13585	up	0.801936	0.847173	no
Jr08_18990_p1	108985551	Q9LDZ0	VIT_00s0415g00030	Heat shock 70 kDa protein 10, mitochondrial	73227	1.82821e+07	2.03258e+07	1.90762e+07	1.8525e+07	1.67845e+07	1.71941e+07	1.9228e+07	1.75012e+07	1.09867	0.135758	up	0.252384	0.330496	no
Jr13_20910_p1	108990803	Q03250	VIT_01s0137g00270	Glycine-rich RNA-binding protein 7 (AtGR-RBP7)	70049	473527	457717	409791	305779	441907	473201	447012	406962	1.09841	0.135418	up	0.517949	0.604518	no
Jr13_07860_p1	#N/A	Q9SEI3	VIT_18s0001g13090	26S proteasome regulatory subunit 10B homolog A	44633	1.8655e+07	1.85205e+07	1.88201e+07	1.68925e+07	1.68471e+07	1.72734e+07	1.86652e+07	1.70043e+07	1.09767	0.134446	up	0.221155	0.29559	no
Jr11_17410_p1	109007758	F4HVZ5	VIT_07s0005g02360	Protein COP1 SUPPRESSOR 2	34478	212852	240208	192517	236710	163046	188498	215192	196085	1.09744	0.134147	up	0.535594	0.621764	no
Jr01_04270_p1	108992833	Q9ZUC1	VIT_01s0127g00740	NADPH-dependent alkenal/one oxidoreductase, chloroplastic (AtAOR)	34928	1.60169e+07	1.48939e+07	1.75418e+07	1.38496e+07	1.41135e+07	1.62086e+07	1.61509e+07	1.47239e+07	1.09691	0.133451	up	0.310666	0.393829	no
Jr01_32090_p1 (+1)	108996004	Q9LNC6	VIT_07s0005g03490	TOM1-like protein 2	44026	5.2649e+06	5.37147e+06	4.9515e+06	4.75054e+06	4.71535e+06	4.75931e+06	5.19596e+06	4.74173e+06	1.09579	0.131976	up	0.23685	0.312889	no
Jr07_20520_p1 (+1)	109010462	Q9M651	VIT_05s0020g02970	RAN GTPase-activating protein 2 (AtRanGAP2; RanGAP2)	58920	9.99479e+06	1.078e+07	1.05817e+07	9.83052e+06	9.49704e+06	9.28845e+06	1.04522e+07	9.53867e+06	1.09577	0.131942	up	0.240067	0.316631	no
Jr13_07430_p1_family	#N/A	Q03250	VIT_03s0063g02610	Glycine-rich RNA-binding protein 7 (AtGR-RBP7)	19278	2.79981e+07	2.82178e+07	3.00977e+07	2.41615e+07	2.61763e+07	2.84618e+07	2.87712e+07	2.62665e+07	1.09536	0.1314	up	0.289192	0.371322	no
Jr08_14640_p1	108987215	Q9S825	VIT_04s0023g00670	Probable eukaryotic translation initiation factor 5-2 (eIF-5 2)	47132	128315	205347	163715	82675.2	204410	167082	165793	151389	1.09514	0.13112	up	0.715168	0.778505	no
Jr02_05000_p2 (+3)	#N/A	P42745	VIT_01s0026g01770	Ubiquitin-conjugating enzyme E2 2	17348	1.9015e+06	2.14814e+06	2.45686e+06	1.97792e+06	1.96016e+06	2.00764e+06	2.16883e+06	1.98191e+06	1.09432	0.13003	up	0.365031	0.4518	no
Jr14_18470_p1	109000588	Q9FMP3	VIT_06s0009g02790	Dihydropyrimidinase	57945	3.71161e+07	4.00207e+07	3.00643e+07	3.41322e+07	3.35555e+07	3.03982e+07	3.57337e+07	3.26953e+07	1.09293	0.1282	up	0.388897	0.475623	no
Jr01_13410_p1	108996314	B9DGD6	VIT_14s0068g00640	Acetyl-coenzyme A synthetase, chloroplastic/glyoxysomal	87576	555214	667788	579854	547212	636474	466370	600952	550018	1.0926	0.12777	up	0.475918	0.563443	no
Jr04_13670_p1 (+1)	108981541	Q9SEI4	VIT_10s0116g00330	26S proteasome regulatory subunit 6B homolog	67525	68728.5	59888.7	71240.7	64909.2	57778.6	60337.8	66619.3	61008.5	1.09197	0.12693	up	0.539098	0.624338	no
Jr14_08460_p1	108996850	Q9LMK2	VIT_06s0004g07090	Protein LIGHT-DEPENDENT SHORT HYPOCOTYLS 6	22422	59720.6	66580.8	55857.8	49021.7	57588.1	60245.4	60719.7	55618.4	1.09172	0.126603	up	0.555805	0.639196	no
Jr07_19490_p1 (+2)	108995010	Q38854	VIT_05s0020g02130	1-deoxy-D-xylulose-5-phosphate synthase, chloroplastic (1-deoxyxylulose-5-phosphate synthase; DXP synthase; DXPS)	77389	418150	341623	323646	285866	346027	360886	361140	330927	1.0913	0.126046	up	0.508935	0.595897	no
Jr12_14690_p1	108986162	Q9LSW8	VIT_05s0049g00470	Electron transfer flavoprotein subunit beta, mitochondrial (Beta-ETF)	30289	8.62783e+06	7.26459e+06	7.55625e+06	6.87768e+06	6.92306e+06	7.68639e+06	7.81623e+06	7.16238e+06	1.09129	0.126033	up	0.324061	0.408297	no
Jr07_05320_p1	108985792	Q84L33	VIT_09s0018g01400	Ubiquitin receptor RAD23b (AtRAD23b)	39770	575591	608251	600103	528790	571778	534848	594648	545139	1.09082	0.125413	up	0.381527	0.468173	no
Jr11_10730_p1	108993630	A1L4X7	VIT_14s0081g00620	AT-hook motif nuclear-localized protein 14	38508	118081	116997	101812	66625.5	120901	121676	112297	103067	1.08955	0.123728	up	0.660291	0.732521	no
Jr06_08810_p1	108995559	P34795	VIT_18s0001g12370	Glucose-6-phosphate isomerase, cytosolic (GPI)	62936	1.28986e+07	1.42225e+07	1.44584e+07	1.44074e+07	1.36167e+07	1.01482e+07	1.38598e+07	1.27241e+07	1.08926	0.123351	up	0.446869	0.536178	no
Jr08_00290_p1	109000969	Q9LU44	VIT_19s0014g01440	Splicing factor-like protein 1 (AtSF1; SF1 homolog protein)	84993	328539	370492	279545	281448	321304	295795	326192	299516	1.08906	0.123089	up	0.502685	0.590256	no
Jr01_11470_p1	108998583	Q9FLI7	VIT_16s0022g02070	CDGSH iron-sulfur domain-containing protein NEET (At-NEET)	13173	3.35291e+06	2.57871e+06	1.98256e+06	2.39051e+06	2.03649e+06	2.84448e+06	2.63806e+06	2.42383e+06	1.08838	0.122188	up	0.586251	0.666535	no
Jr10_20880_p1	108997862	Q9ZPI6	VIT_11s0016g03690	3-hydroxyacyl-CoA dehydrogenase	32115	91327.9	141223	86355.3	138796	83500.3	70744	106302	97680.2	1.08827	0.12203	up	0.715204	0.778505	no
Jr03_27140_p1	108986268	Q9ZVH7	VIT_08s0058g01350	Protein FATTY ACID EXPORT 3, chloroplastic (At-FAX3)	38934	1.81932e+06	1.89545e+06	1.80599e+06	1.75258e+06	1.73698e+06	1.58972e+06	1.84025e+06	1.69309e+06	1.08692	0.120242	up	0.34384	0.428954	no
Jr01_13800_p1	108996216	F4KHI3	VIT_07s0031g02460	Protein VARIATION IN COMPOUND TRIGGERED ROOT groInfh response	36473	90136.7	83650.9	91479.7	70064.4	82316.9	91726.8	88422.4	81369.4	1.08668	0.119926	up	0.568703	0.651335	no
Jr08_10400_p1 (+1)	109000502	P34791	VIT_07s0005g02410	Peptidyl-prolyl cis-trans isomerase CYP20-3, chloroplastic (PPIase CYP20-3)	29109	1.34262e+07	1.28983e+07	1.21302e+07	1.19499e+07	1.14566e+07	1.19903e+07	1.28182e+07	1.1799e+07	1.08639	0.119539	up	0.295111	0.377889	no
Jr12_08800_p1	#N/A	O23255	VIT_05s0029g00330	Adenosylhomocysteinase 1 (AdoHcyase 1)	51196	8.22663e+06	1.01257e+07	9.4697e+06	9.28804e+06	9.19978e+06	7.12446e+06	9.27401e+06	8.53743e+06	1.08628	0.119391	up	0.444178	0.533337	no
Jr13_02890_p1	109010645	Q93ZN9	VIT_03s0088g01040	LL-diaminopimelate aminotransferase, chloroplastic (AtDAP-AT; DAP-AT; DAP-aminotransferase; LL-DAP-aminotransferase)	50172	6.80448e+06	6.61577e+06	6.93922e+06	5.77916e+06	6.59411e+06	6.37632e+06	6.78649e+06	6.24986e+06	1.08586	0.118841	up	0.310159	0.393489	no
Jr09_11490_p1	108997019	Q42605	VIT_02s0025g04210	Bifunctional UDP-glucose 4-epimerase and UDP-xylose 4-epimerase 1	39200	175453	204368	175495	186270	173903	151567	185105	170580	1.08515	0.117895	up	0.540299	0.625509	no
Jr10_23690_p1	109008784	O22765	VIT_07s0141g00210	Tryptophan synthase alpha chain	38112	923376	842888	977563	895594	806597	826356	914609	842849	1.08514	0.117881	up	0.412949	0.50095	no
Jr13_10770_p1	108997395	Q9SX25	VIT_01s0150g00620	Probable carboxylesterase 6	49557	984107	1.05161e+06	860322	950572	880691	839060	965347	890108	1.08453	0.117068	up	0.437154	0.526053	no
Jr05_07630_p1	109007645	Q9LJN4	VIT_06s0004g06110	Probable beta-D-xylosidase 5 (AtBXL5)	67036	3.3257e+06	3.19506e+06	3.64532e+06	2.9752e+06	3.30505e+06	3.0939e+06	3.38869e+06	3.12471e+06	1.08448	0.117005	up	0.348983	0.43422	no
Jr07_33660_p1 (+2)	108980852	Q9FEB5	VIT_00s0250g00020	Phosphoglucan phosphatase DSP4, chloroplastic	42457	251477	141776	234320	89334.6	238554	251076	209191	192988	1.08396	0.116307	up	0.780712	0.829538	no
Jr14_19460_p1	108998731	F4JFN3	VIT_13s0074g00320	Heat shock protein 90-6, mitochondrial (AtHSP90.6; AtHsp90-6)	12547	1.08202e+06	1.12525e+06	1.01719e+06	788428	963410	1.22324e+06	1.07482e+06	991693	1.08382	0.11613	up	0.541968	0.627085	no
Jr06_16180_p1	108983065	Q9LVI9	VIT_17s0000g01950	Dihydropyrimidine dehydrogenase (NADP(+)), chloroplastic (DHPDH; DPD)	46249	946613	1.41045e+06	1.21464e+06	828002	1.26564e+06	1.20267e+06	1.19057e+06	1.09877e+06	1.08355	0.115763	up	0.60848	0.687303	no
Jr07_28960_p1	109000813	Q38905	VIT_09s0002g03250	Profilin-4	14051	1.01487e+07	1.19534e+07	1.30224e+07	1.19899e+07	9.95679e+06	1.04843e+07	1.17082e+07	1.08103e+07	1.08306	0.115108	up	0.431525	0.520039	no
Jr08_21190_p1	109009751	Q94F49	VIT_14s0060g02360	Probable histone H2A.5	15288	14653.9	15006.2	22717.8	10476.5	14706.8	23193.8	17459.3	16125.7	1.0827	0.114629	up	0.748157	0.804196	no
Jr10_24480_p1	109010722	O82662	VIT_07s0005g03790	Succinate--CoA ligase [ADP-forming] subunit beta, mitochondrial	45420	1.17576e+07	1.29269e+07	1.11781e+07	1.17356e+07	1.03307e+07	1.10575e+07	1.19542e+07	1.10413e+07	1.08268	0.114611	up	0.355393	0.440863	no
Jr16_02520_p1 (+1)	109012476	F4I8W6	VIT_16s0039g02270	WAT1-related protein At1g11460	27291	529926	585553	502812	481762	508159	505306	539430	498409	1.0823	0.114106	up	0.449765	0.538867	no
Jr07_17750_p1	109005463	Q04088	VIT_05s0102g01120	Probable transcription factor PosF21	46717	325138	281248	383743	213206	340812	361070	330043	305029	1.082	0.113706	up	0.651269	0.725687	no
Jr01_28640_p1 (+1)	108992687	Q56YU0	VIT_14s0066g01550	Aldehyde dehydrogenase family 2 member C4	55778	273848	307862	269217	320094	237012	229461	283642	262189	1.08182	0.113465	up	0.576262	0.658357	no
Jr15_01210_p1	108980112	Q9LHK1	VIT_18s0072g00380	Nudix hydrolase 16, mitochondrial (AtNUDT16)	19440	879047	771767	947477	952408	578437	871927	866097	800924	1.08137	0.112863	up	0.604057	0.683009	no
Jr14_16020_p1	#N/A	P53780	VIT_08s0007g05410	Cystathionine beta-lyase, chloroplastic (CBL)	50314	414489	398292	376214	343674	402112	353790	396332	366526	1.08132	0.112795	up	0.48601	0.57344	no
Jr08_03410_p1	109007374	Q94FY7	VIT_04s0008g03600	Tocopherol cyclase, chloroplastic	57045	113356	56209	133835	111226	90545.2	79427.5	101133	93732.9	1.07895	0.10963	up	0.750689	0.805427	no
Jr03_07250_p1	108990609	Q9SIP1	VIT_11s0016g01330	Stress-response A/B barrel domain-containing protein UP3	23548	758292	792391	821780	787217	672874	739131	790821	733074	1.07877	0.109392	up	0.450288	0.539103	no
Jr16_02800_p1	109012464	Q9SGZ5	VIT_18s0001g05160	Probable beta-D-xylosidase 7 (AtBXL7)	85884	98143.7	66663.8	102206	69076.4	92471.4	86203.8	89004.7	82583.9	1.07775	0.108021	up	0.671452	0.742335	no
Jr01_29580_p1	109006259	P83291	VIT_11s0016g04970	NADH-cytochrome b5 reductase-like protein (B5R)	36205	6.94067e+07	7.26878e+07	6.66292e+07	6.6738e+07	6.08444e+07	6.62345e+07	6.95746e+07	6.46056e+07	1.07691	0.106901	up	0.376198	0.462667	no
Jr07_07540_p1	109006410	Q9FGK8	VIT_15s0046g02140	Protein transport protein SEC16B homolog	26504	308428	294093	400097	287532	316585	327032	334206	310383	1.07675	0.106688	up	0.577577	0.659174	no
Jr13_21280_p1	108991808	Q9FT97	VIT_01s0137g00630	Alpha-galactosidase 1 (AtAGAL1)	71733	3.15207e+06	3.41099e+06	3.04382e+06	3.15945e+06	2.89713e+06	2.86646e+06	3.20229e+06	2.97435e+06	1.07664	0.106532	up	0.389711	0.476205	no
Jr05_01770_p1 (+1)	108989422	Q9M2V1	VIT_13s0047g00170	Protein NCA1	45631	254231	260173	268367	229952	255716	241469	260924	242379	1.07651	0.106363	up	0.524401	0.610751	no
Jr09_08880_p1 (+1)	109005468	O64740	VIT_14s0066g02380	Protein transport protein SEC13 homolog B	32780	283529	254884	272415	247265	257698	248240	270276	251068	1.07651	0.106358	up	0.521489	0.607789	no
Jr07_07660_p1 (+1)	109009167	Q8VYU6	VIT_15s0046g01750	Golgin candidate 4 (AtGC4)	89503	60351	85342.1	63009.5	45604.5	70767.3	77520.1	69567.5	64630.6	1.07639	0.106195	up	0.708739	0.774024	no
Jr13_25350_p1	109003337	Q9SK86	VIT_06s0004g04330	Alcohol dehydrogenase-like 1	40785	114256	135116	71531.6	82819.7	110199	105152	106968	99390.1	1.07624	0.106004	up	0.71249	0.776771	no
Jr10_01010_p1 (+1)	109001910	Q66GN9	VIT_18s0089g01240	CLP protease regulatory subunit CLPX3, mitochondrial	77932	143827	132564	132101	129493	125241	124837	136164	126524	1.07619	0.105935	up	0.563598	0.646659	no
Jr11_11250_p1	108983184	Q9XFH8	VIT_04s0023g00740	Thioredoxin F1, chloroplastic (AtTrxf1)	25678	1.35759e+07	9.50774e+06	1.0822e+07	8.82557e+06	9.1785e+06	1.35017e+07	1.13019e+07	1.05019e+07	1.07617	0.105908	up	0.622335	0.699597	no
Jr07_37360_p1	108991754	P13853	VIT_13s0019g03000	17.6 kDa class I heat shock protein 3	22111	508748	1.33877e+06	270448	724885	1.02996e+06	213980	705989	656276	1.07575	0.105342	up	0.877158	0.904604	no
Jr08_22840_p1 (+1)	109001895	O49460	VIT_07s0031g02220	Prohibitin-1, mitochondrial (Atphb1)	18235	67601.2	54884.3	77835.1	30456	70568.9	85284	66773.5	62103	1.07521	0.104614	up	0.787414	0.835851	no
Jr13_08260_p1	108986992	Q945M1	VIT_03s0038g00720	NADH dehydrogenase [ubiquinone] 1 beta subcomplex subunit 9	13563	1.84941e+06	1.42248e+06	2.095e+06	1.49714e+06	1.72316e+06	1.77345e+06	1.78896e+06	1.66458e+06	1.07472	0.103963	up	0.563668	0.646659	no
Jr05_08760_p1 (+3)	#N/A	Q39250	VIT_06s0004g04280	Actin-depolymerizing factor 1 (ADF-1; AtADF1)	15983	179524	230300	159458	302221	120677	106864	189761	176587	1.0746	0.103802	up	0.80318	0.848211	no
Jr08_10320_p1	109000508	Q8GYX8	VIT_18s0122g00050	Chaperone protein dnaJ 10 (AtDjC10; AtJ10)	43893	1.16964e+06	1.28673e+06	1.2615e+06	976933	1.24174e+06	1.2421e+06	1.23929e+06	1.15359e+06	1.07429	0.103381	up	0.507649	0.594603	no
Jr12_07280_p1 (+1)	108992464	Q8LPQ9	VIT_05s0102g01160	Flowering time control protein FPA	108815	111800	109333	104613	73042.7	115068	115247	108582	101119	1.0738	0.102727	up	0.674483	0.745255	no
Jr02_04150_p1	108999250	Q9S795	VIT_17s0000g07650	Betaine aldehyde dehydrogenase 1, chloroplastic (BADH)	54539	1.30021e+07	1.38215e+07	1.31339e+07	1.38252e+07	1.21222e+07	1.1289e+07	1.33192e+07	1.24121e+07	1.07308	0.101755	up	0.425037	0.513159	no
Jr11_07760_p1 (+1)	108992028	Q9ASP6	VIT_04s0023g03150	Heterogeneous nuclear ribonucleoprotein Q (hnRNP Q)	99030	169208	155884	193129	153432	164997	164686	172740	161039	1.07267	0.1012	up	0.591663	0.671298	no
Jr02_03410_p1	108991479	Q9XFS9	VIT_17s0000g08390	1-deoxy-D-xylulose 5-phosphate reductoisomerase, chloroplastic (1-deoxyxylulose-5-phosphate reductoisomerase; DXP reductoisomerase)	51203	2.64112e+06	1.01449e+06	1.4694e+06	956789	1.93275e+06	1.89492e+06	1.70834e+06	1.59482e+06	1.07118	0.0991992	up	0.803885	0.848211	no
Jr11_24410_p1	108998886	Q9FKG3	VIT_16s0013g01140	ATP-dependent 6-phosphofructokinase 4, chloroplastic (ATP-PFK 4; Phosphofructokinase 4)	57670	461934	393770	390352	400847	398411	364678	415352	387978	1.07055	0.098359	up	0.546845	0.63021	no
Jr03_22580_p1	108984700	Q9LZ06	VIT_08s0040g03100	Glutathione S-transferase L3 (AtGSTL3)	26810	2.09285e+07	1.9452e+07	2.08517e+07	2.09423e+07	1.60502e+07	2.02167e+07	2.04108e+07	1.90698e+07	1.07032	0.0980431	up	0.493122	0.580187	no
Jr07_36760_p1	108986361	Q8VZ79	VIT_13s0019g01610	Protein INVOLVED IN DE NOVO 2	73499	85367.1	70036.5	99851	63079.7	84939.9	90562.1	85084.9	79527.2	1.06988	0.0974537	up	0.695355	0.763514	no
Jr07_03320_p1 (+1)	108995353	Q9FIM9	VIT_17s0000g00010	CDPK-related kinase 4 (AtCRK4)	52228	280305	299904	301922	260230	289960	274826	294044	275005	1.06923	0.0965724	up	0.55782	0.641065	no
Jr15_03480_p1_family	109008855	Q9LZ82	VIT_04s0008g00820	Protein BTR1	72424	3.02576e+06	3.12295e+06	2.86191e+06	2.94896e+06	2.62875e+06	2.84957e+06	3.00354e+06	2.80909e+06	1.06922	0.09656	up	0.433286	0.521589	no
Jr01_02640_p1	109012348	Q9FLY5	VIT_18s0001g06810	ARF guanine-nucleotide exchange factor GNL1	39030	198267	245911	311598	197842	263250	245807	251925	235633	1.06914	0.0964564	up	0.679601	0.749402	no
Jr01_14630_p1 (+5)	#N/A	P53492	VIT_04s0044g00580	Actin-7	41695	1.53784e+07	1.84943e+07	1.68703e+07	1.50952e+07	1.69518e+07	1.54234e+07	1.69143e+07	1.58235e+07	1.06894	0.0961805	up	0.455571	0.543847	no
Jr02_02570_p1 (+4)	109005540	Q9SB64	VIT_17s0000g09280	Protein NBR1 homolog (AtNBR1)	85698	173582	149113	179864	146743	163540	159912	167520	156732	1.06883	0.0960324	up	0.61115	0.689862	no
Jr03_23030_p1	#N/A	Q9LFG2	VIT_08s0040g02540	Diaminopimelate epimerase, chloroplastic (DAP epimerase)	39592	7.62979e+06	8.1434e+06	7.67905e+06	7.57555e+06	7.07697e+06	7.2968e+06	7.81741e+06	7.31644e+06	1.06847	0.0955494	up	0.3958	0.482633	no
Jr13_30250_p1 (+4)	#N/A	P35133	VIT_02s0025g01050	Ubiquitin-conjugating enzyme E2 10	22245	3.36449e+06	3.72092e+06	3.70576e+06	3.74029e+06	3.26188e+06	3.10437e+06	3.59706e+06	3.36885e+06	1.06774	0.0945623	up	0.473639	0.561148	no
Jr09_14550_p1	108993177	Q9FL69	VIT_19s0014g03510	ADP-ribosylation factor GTPase-activating protein AGD5 (ARF GAP AGD5)	48884	969606	917528	841911	777819	880622	898458	909682	852300	1.06733	0.0940012	up	0.523011	0.609348	no
Jr16_20830_p1	108995717	Q9SRX4	VIT_07s0005g00720	Pectinesterase 7	62185	45047.9	38089.4	42412.9	30497.8	47313.1	39843.2	41850.1	39218	1.06711	0.0937132	up	0.705595	0.772382	no
Jr14_15780_p1	108988271	Q9SJF1	VIT_06s0009g00250	GTPase LSG1-2 (AtLSG1-2)	68082	100517	108517	117070	102621	105313	97792.8	108702	101909	1.06666	0.0930951	up	0.630689	0.707539	no
Jr13_07190_p1	109012058	Q9SAA2	VIT_03s0063g02300	ATP-dependent Clp protease proteolytic subunit 6, chloroplastic	34037	1.22229e+06	1.20463e+06	1.2353e+06	976387	1.23469e+06	1.22445e+06	1.22074e+06	1.14518e+06	1.06598	0.0921812	up	0.543118	0.627671	no
Jr07_30890_p1	108984011	Q9LLC1	VIT_09s0002g06120	Biotin carboxyl carrier protein of acetyl-CoA carboxylase 2, chloroplastic (AtBCCP2; BCCP-2)	29400	595078	634006	561547	545240	533855	601830	596877	560308	1.06526	0.0912122	up	0.542376	0.627253	no
Jr05_07450_p1	108983000	Q8LDP4	VIT_06s0004g06610	Peptidyl-prolyl cis-trans isomerase CYP19-4 (PPIase CYP19-4)	22298	6.37571e+07	5.66539e+07	6.69806e+07	5.46164e+07	5.65961e+07	6.47298e+07	6.24639e+07	5.86474e+07	1.06507	0.0909535	up	0.506632	0.593622	no
Jr07_11820_p1	109010775	Q9SEE5	VIT_05s0077g00690	Galactokinase	54666	2.66684e+06	2.76771e+06	2.58372e+06	2.8536e+06	2.46854e+06	2.20971e+06	2.67276e+06	2.51062e+06	1.06458	0.0902868	up	0.526574	0.612632	no
Jr15_12340_p1 (+1)	108993151	Q93ZT6	VIT_11s0037g00490	Eukaryotic translation initiation factor isoform 4G-1 (eIF(iso)4G-1)	86549	1.74231e+06	1.78274e+06	1.48795e+06	1.83831e+06	1.4364e+06	1.43488e+06	1.671e+06	1.56986e+06	1.06443	0.0900749	up	0.581513	0.66229	no
Jr13_27110_p1	108984656	Q8LB47	VIT_18s0001g04190	GrpE protein homolog 2, mitochondrial	35868	8.99385e+06	8.85059e+06	9.0386e+06	8.19095e+06	8.73844e+06	8.33038e+06	8.96102e+06	8.41992e+06	1.06426	0.0898551	up	0.415867	0.503748	no
Jr11_02760_p1	109008078	Q06327	VIT_14s0128g00780	Linoleate 9S-lipoxygenase 1	98118	2.12221e+06	1.88071e+06	2.2258e+06	1.83865e+06	2.09422e+06	1.92038e+06	2.07624e+06	1.95108e+06	1.06415	0.0896993	up	0.514032	0.600972	no
Jr07_27780_p1 (+1)	108983631	A4FVR1	VIT_09s0002g01530	GBF-interacting protein 1-like (Protein GIP1-like)	94210	102049	251571	172018	72217.8	209895	212295	175213	164803	1.06317	0.0883687	up	0.852896	0.885121	no
Jr04_15260_p1	109020964	O82179	VIT_01s0011g01990	Glycine cleavage system H protein 2, mitochondrial	19094	1.17261e+07	1.19316e+07	1.25837e+07	1.22147e+07	1.03673e+07	1.15125e+07	1.20805e+07	1.13648e+07	1.06297	0.0881021	up	0.470097	0.558156	no
Jr15_09160_p1	108986685	Q9SGE9	VIT_17s0000g04630	Phenylalanine--tRNA ligase beta subunit, cytoplasmic	67183	105565	75445.4	96810.6	45521.4	111270	104666	92606.9	87152.4	1.06259	0.0875791	up	0.808548	0.851974	no
Jr13_12600_p1	109003170	P82873	VIT_14s0068g02030	Mitochondrial import receptor subunit TOM20-2	22216	453977	408130	431572	370983	402482	444691	431227	406052	1.062	0.0867809	up	0.590123	0.669989	no
Jr07_07420_p1 (+1)	109003525	O04536	VIT_15s0046g02270	Probable galacturonosyltransferase-like 9	120266	300449	471341	288416	265227	348986	384716	353402	332976	1.06134	0.0858902	up	0.739433	0.796982	no
Jr02_15560_p1	109002067	Q8H0V6	VIT_02s0025g02160	ABC transporter F family member 3 (ABC transporter ABCF.3; AtABCF3)	79634	327402	450838	356103	407022	299719	362293	378114	356344	1.06109	0.08555	up	0.679043	0.749156	no
Jr13_09410_p1 (+3)	#N/A	Q9SZN1	VIT_03s0038g02760	V-type proton ATPase subunit B2 (V-ATPase subunit B2)	54311	1.97967e+07	2.23082e+07	2.08818e+07	2.17771e+07	2.06101e+07	1.6974e+07	2.09956e+07	1.97871e+07	1.06108	0.0855277	up	0.543777	0.628212	no
Jr01_23390_p1 (+2)	109019225	Q9C8L4	VIT_12s0028g00630	Persulfide dioxygenase ETHE1 homolog, mitochondrial	32878	2.31784e+06	3.04414e+06	2.26006e+06	2.92901e+06	2.22189e+06	2.03528e+06	2.54068e+06	2.39539e+06	1.06065	0.084954	up	0.665185	0.736976	no
Jr02_24620_p1 (+1)	108984361	Q9SZ30	VIT_19s0090g00810	Cyclase	66323	9.61341e+06	8.27312e+06	9.12524e+06	8.3891e+06	8.18031e+06	8.89976e+06	9.00392e+06	8.48973e+06	1.06057	0.0848359	up	0.482626	0.569748	no
Jr13_14170_p1	109014389	Q9FNR1	VIT_05s0102g00560	Glycine-rich RNA-binding protein 3, mitochondrial (AtGR-RBP3)	19388	457320	430198	447391	398089	430083	430605	444970	419593	1.06048	0.0847179	up	0.573098	0.655197	no
Jr01_02810_p1	109006344	Q8GYB8	VIT_18s0041g02080	12-oxophytodienoate reductase 2	44956	822551	723999	625424	713698	648987	686081	723991	682922	1.06014	0.0842521	up	0.603106	0.682168	no
Jr16_14460_p1	109004779	Q9FHR8	VIT_01s0146g00270	Delta(3,5)-Delta(2,4)-dienoyl-CoA isomerase, peroxisomal (AtDCI1)	29393	125400	124887	132560	153012	103313	104833	127616	120386	1.06005	0.0841378	up	0.715161	0.778505	no
Jr07_18330_p1	108987299	Q8RWZ3	VIT_05s0077g01940	Probable acyl-CoA dehydrogenase IBR3	54114	306701	302424	357703	274015	345877	292331	322276	304074	1.05986	0.083874	up	0.646221	0.721038	no
Jr03_01900_p1 (+1)	108985720	Q9SR77	VIT_08s0007g03270	Heme-binding-like protein At3g10130, chloroplastic	34227	4.78413e+06	4.73313e+06	4.25435e+06	4.50562e+06	4.07167e+06	4.42164e+06	4.59054e+06	4.33297e+06	1.05944	0.0833053	up	0.488693	0.57629	no
Jr13_28580_p1	109007757	Q8GXT3	VIT_14s0128g00480	Transcription factor bHLH123	25025	5.22983e+06	5.93e+06	6.17315e+06	5.85023e+06	5.16634e+06	5.34745e+06	5.77766e+06	5.45467e+06	1.05921	0.0829918	up	0.513207	0.600438	no
Jr08_00090_p1 (+1)	109000956	F4JL11	VIT_09s0070g00380	Importin subunit alpha-2 (IMPa-2)	22937	1.44225e+06	1.65076e+06	1.47321e+06	1.45667e+06	1.44603e+06	1.40939e+06	1.52207e+06	1.43736e+06	1.05894	0.0826143	up	0.53364	0.619978	no
Jr12_22390_p1	109002991	Q8VYK4	VIT_13s0019g03600	Nuclear transcription factor Y subunit B-8 (AtNF-YB-8)	17904	99829.9	113776	110454	79441.3	107178	119425	108020	102015	1.05886	0.0825174	up	0.719703	0.78211	no
Jr11_21140_p1	108991334	Q9C7U8	VIT_18s0117g00130	Subtilisin-like protease SBT3.17	14163	8.93164e+06	8.7589e+06	9.03478e+06	7.99701e+06	7.71446e+06	9.54217e+06	8.90844e+06	8.41788e+06	1.05828	0.081715	up	0.528599	0.614555	no
Jr15_03520_p1	109008854	Q9SQZ9	VIT_04s0008g00760	PITH domain-containing protein At3g04780	24926	732992	872720	1.1038e+06	834261	876425	849639	903170	853442	1.05827	0.0817051	up	0.656579	0.730286	no
Jr14_04310_p1	109015577	Q0WQF7	VIT_13s0074g00150	Dihydrolipoyllysine-residue acetyltransferase component 1 of pyruvate dehydrogenase complex, mitochondrial	69501	1.39294e+07	1.46552e+07	1.38032e+07	1.32721e+07	1.34203e+07	1.33658e+07	1.41293e+07	1.33527e+07	1.05816	0.081553	up	0.461557	0.549798	no
Jr03_05520_p1	108988414	P54904	VIT_08s0007g05600	Pyrroline-5-carboxylate reductase (P5C reductase; P5CR)	28718	1.43451e+06	1.52236e+06	1.4174e+06	1.68432e+06	1.261e+06	1.19486e+06	1.45809e+06	1.38006e+06	1.05654	0.0793487	up	0.644031	0.719568	no
Jr03_01830_p1 (+1)	108985726	Q8LCY2	VIT_08s0007g03330	Iron-sulfur assembly protein IscA-like 2, mitochondrial	17315	335741	284705	339352	288539	305324	315059	319933	302974	1.05597	0.0785731	up	0.64379	0.719568	no
Jr10_20110_p1 (+1)	109021721	P93834	VIT_11s0016g03070	Hexokinase-2	53787	6.33792e+06	6.44314e+06	5.96111e+06	6.39236e+06	6.10564e+06	5.25133e+06	6.24739e+06	5.91644e+06	1.05594	0.0785238	up	0.538685	0.624079	no
Jr14_05250_p1_family	109014599	P42825	VIT_06s0080g01230	Chaperone protein dnaJ 2 (AtDjA2)	46376	1.0878e+06	1.06188e+06	925337	1.04796e+06	975999	888791	1.02501e+06	970917	1.05571	0.078215	up	0.601363	0.680663	no
Jr01_07400_p1	108988135	Q9M884	VIT_14s0006g02820	Mannose-6-phosphate isomerase 1	47807	2.96808e+06	3.50414e+06	3.11501e+06	3.09671e+06	3.12222e+06	2.86342e+06	3.19574e+06	3.02745e+06	1.05559	0.0780479	up	0.54456	0.628573	no
Jr08_22660_p1	109007932	Q9C523	VIT_04s0044g00040	Dirigent protein 19 (AtDIR19)	21150	1.25432e+06	1.25068e+06	1.96753e+06	1.47099e+06	1.41059e+06	1.35618e+06	1.49084e+06	1.41259e+06	1.0554	0.0777912	up	0.708567	0.774024	no
Jr09_03330_p1 (+1)	108991448	Q9FXT6	VIT_17s0000g08410	Peroxisomal membrane protein PEX14	57799	621341	622178	571107	561463	573926	584060	604875	573150	1.05535	0.0777262	up	0.586033	0.666517	no
Jr05_02680_p1 (+6)	108990134	Q94JU3	VIT_15s0021g01580	COP9 signalosome complex subunit 7 (CSN complex subunit 7)	29489	878343	724329	1.00504e+06	479304	845896	1.14581e+06	869236	823669	1.05532	0.0776827	up	0.803827	0.848211	no
Jr14_05650_p1	109008026	Q8LEU3	VIT_01s0010g00590	Chlorophyll(ide) b reductase NOL, chloroplastic	38426	447966	376465	409744	381641	413336	374672	411392	389883	1.05517	0.07747	up	0.631401	0.707856	no
Jr05_15950_p1	109021133	Q9C891	VIT_08s0007g06950	Dirigent protein 20 (AtDIR20)	20678	2.50692e+06	2.93051e+06	3.35892e+06	2.55722e+06	2.98524e+06	2.79491e+06	2.93212e+06	2.77912e+06	1.05505	0.0773133	up	0.615373	0.692952	no
Jr03_21320_p1	#N/A	Q9SCN8	VIT_08s0040g01480	Cell division control protein 48 homolog D (AtCDC48d)	95460	1.74437e+06	1.82794e+06	1.6894e+06	2.11762e+06	1.4425e+06	1.43166e+06	1.7539e+06	1.66393e+06	1.05407	0.0759744	up	0.686202	0.754662	no
Jr11_08130_p1	108997699	P55034	VIT_04s0023g03620	26S proteasome non-ATPase regulatory subunit 4 homolog	43024	1.15529e+07	1.17977e+07	1.08432e+07	1.11375e+07	1.06598e+07	1.0651e+07	1.13979e+07	1.08161e+07	1.05379	0.0755894	up	0.502983	0.590396	no
Jr05_04850_p1 (+1)	109015996	D9UBX6	VIT_13s0175g00050	Inactive protein RESTRICTED TEV MOVEMENT 2	45598	51509.2	60968.5	59589.7	49039.5	60002.2	54395.1	57355.8	54478.9	1.05281	0.0742405	up	0.729302	0.789159	no
Jr01_32290_p1	108996013	Q93Z16	VIT_07s0005g03640	Dolichyl-diphosphooligosaccharide--protein glycosyltransferase subunit 2	75405	167016	212670	166368	204329	178233	136197	182018	172920	1.05262	0.0739795	up	0.74881	0.804196	no
Jr11_07940_p1	108997708	Q9S818	VIT_04s0023g03370	Naringenin,2-oxoglutarate 3-dioxygenase (Naringenin 3-dioxygenase)	41043	4.00246e+07	4.07831e+07	5.6588e+07	4.92007e+07	4.0971e+07	4.04948e+07	4.57986e+07	4.35555e+07	1.0515	0.0724486	up	0.685938	0.754662	no
Jr16_05050_p1	109007529	Q9LHD1	VIT_16s0098g00880	ABC transporter B family member 15 (ABC transporter ABCB.15; AtABCB15)	32889	637232	643355	648282	588261	622061	626886	642956	612403	1.04989	0.0702392	up	0.613637	0.691469	no
Jr03_24380_p1	109010014	Q0PGJ6	VIT_08s0007g01040	NADPH-dependent aldo-keto reductase, chloroplastic (AtChlAKR)	35099	1.71337e+06	1.68022e+06	1.84789e+06	1.65695e+06	1.60003e+06	1.73883e+06	1.74716e+06	1.66527e+06	1.04917	0.0692535	up	0.590306	0.669989	no
Jr07_21240_p1	109000341	Q9SIU2	VIT_05s0020g03690	Nuclear cap-binding protein subunit 1	28408	112357	92176.6	106022	92595.2	102950	100460	103518	98668.3	1.04916	0.0692303	up	0.729948	0.789547	no
Jr12_09520_p1	108982508	Q8L7K9	VIT_05s0020g00880	NAD-dependent malic enzyme 2, mitochondrial (AtNAD-ME2; NAD-malic enzyme 2)	71531	87413.3	49369.1	115974	60368.9	92978.9	87896.9	84252.3	80414.9	1.04772	0.0672531	up	0.848126	0.882076	no
Jr02_26730_p1	108986094	Q9FMA3	VIT_19s0015g01940	Peroxisome biogenesis protein 5	82726	340260	396632	386038	373186	337148	361711	374310	357349	1.04746	0.0669012	up	0.681341	0.751071	no
Jr16_12500_p1	#N/A	Q05753	VIT_01s0011g00840	Ankyrin repeat domain-containing protein, chloroplastic (AKRP)	25960	1.46826e+06	1.57893e+06	1.79985e+06	1.52976e+06	1.61162e+06	1.48734e+06	1.61568e+06	1.54291e+06	1.04716	0.0664881	up	0.638324	0.714645	no
Jr01_02570_p1	109012344	Q9XF91	VIT_18s0001g06720	Photosystem II 22 kDa protein, chloroplastic	32088	1.9127e+06	1.54477e+06	1.7422e+06	1.34775e+06	1.68608e+06	1.93291e+06	1.73322e+06	1.65558e+06	1.0469	0.0661191	up	0.710162	0.775017	no
Jr11_14130_p1	109008243	Q8RX79	VIT_07s0104g01470	Peptide chain release factor APG3, chloroplastic	47148	484283	412046	383863	396074	407800	419281	426731	407718	1.04663	0.0657533	up	0.691798	0.760308	no
Jr12_22330_p1	109002987	Q9FT52	VIT_13s0019g03860	ATP synthase subunit d, mitochondrial (ATPase subunit d)	19735	1.34207e+07	1.41139e+07	1.50674e+07	1.32969e+07	1.22629e+07	1.51601e+07	1.42007e+07	1.35733e+07	1.04622	0.0651898	up	0.622615	0.699673	no
Jr09_11030_p1 (+1)	108997432	P46309	VIT_02s0025g03530	Glutamate--cysteine ligase, chloroplastic	59214	7.569e+06	8.03153e+06	7.25735e+06	7.65891e+06	7.54155e+06	6.66363e+06	7.61929e+06	7.28803e+06	1.04545	0.0641277	up	0.598986	0.678206	no
Jr13_03940_p1 (+1)	108980004	Q9ASP6	VIT_03s0017g01340	Heterogeneous nuclear ribonucleoprotein Q (hnRNP Q)	83474	9046.53	9186.54	11712	3359.51	12568.8	12717	9981.68	9548.42	1.04537	0.0640187	up	0.894605	0.919695	no
Jr08_07940_p1 (+1)	109003263	Q8L7Z3	VIT_01s0010g01180	Anamorsin homolog	28977	279350	298626	252464	244504	294604	255575	276813	264894	1.04499	0.0634957	up	0.723384	0.784816	no
Jr01_30000_p1	108995649	Q9CAF4	VIT_11s0016g05470	Nuclear pore complex protein NUP1	74284	201748	280303	204142	261651	188603	206514	228731	218922	1.0448	0.0632303	up	0.782493	0.831162	no
Jr03_00170_p1	108983584	Q94K05	VIT_08s0007g07460	T-complex protein 1 subunit theta (TCP-1-theta)	58977	5.54365e+06	5.99247e+06	5.84922e+06	5.91921e+06	5.72997e+06	4.99285e+06	5.79511e+06	5.54734e+06	1.04467	0.0630407	up	0.611164	0.689862	no
Jr01_19040_p1	109006857	Q9SIB9	VIT_19s0090g00460	Aconitate hydratase 3, mitochondrial (Aconitase 3; mACO1)	109470	3.16508e+07	3.31264e+07	3.16858e+07	3.3262e+07	3.06361e+07	2.84458e+07	3.21543e+07	3.07813e+07	1.04461	0.0629595	up	0.606008	0.68498	no
Jr01_27080_p1	109009947	Q9LVT4	VIT_11s0016g02520	Probable disease resistance protein At5g47250	34619	2.96806e+06	2.75193e+06	2.41716e+06	2.50619e+06	2.19231e+06	3.09215e+06	2.71238e+06	2.59688e+06	1.04448	0.0627783	up	0.712509	0.776771	no
Jr03_10580_p1	108990967	O22059	VIT_10s0116g00500	Transcription factor CPC	12141	138859	147745	140461	140477	131297	137202	142355	136325	1.04423	0.0624417	up	0.730672	0.789605	no
Jr07_20030_p1	108995091	O82375	VIT_05s0020g02550	Putative F-box/kelch-repeat protein At2g29810	28434	795869	701701	887369	599029	807258	877904	794980	761397	1.04411	0.0622697	up	0.74948	0.804391	no
Jr05_05440_p1	108996311	O23593	VIT_00s0337g00010	RGG repeats nuclear RNA binding protein B	55491	7.59302e+06	7.17986e+06	7.56736e+06	7.18457e+06	6.95458e+06	7.26334e+06	7.44675e+06	7.13417e+06	1.04381	0.0618656	up	0.576909	0.658868	no
Jr01_17400_p1 (+1)	108989049	Q9FLT9	VIT_07s0095g00730	Chloroplastic import inner membrane translocase subunit HP30-2	22860	568971	519762	506436	492243	501433	534566	531723	509414	1.04379	0.061836	up	0.67883	0.749156	no
Jr05_01390_p1	108989117	Q9LK88	VIT_13s0084g00850	NADPH:quinone oxidoreductase	18938	1.12142e+07	8.83811e+06	8.85549e+06	9.30183e+06	7.86315e+06	1.0531e+07	9.63592e+06	9.23199e+06	1.04375	0.0617802	up	0.707601	0.773807	no
Jr06_15760_p1 (+1)	108994897	Q9SUC0	VIT_17s0000g02140	Probable 3-hydroxyisobutyrate dehydrogenase, mitochondrial (HIBADH)	147366	23035.4	37444.2	27335.7	18265.8	37883	28010	29271.8	28052.9	1.04345	0.0613563	up	0.855912	0.886269	no
Jr12_21370_p1	108982692	P42742	VIT_15s0048g00900	Proteasome subunit beta type-1	24549	361417	354950	324210	356170	325432	316295	346859	332632	1.04277	0.0604206	up	0.710354	0.775017	no
Jr01_15820_p1	108983550	Q8L8Q8	VIT_04s0069g00960	Uncharacterized protein At5g64816	14070	146273	152319	159508	175378	129535	134460	152700	146457	1.04262	0.0602172	up	0.77143	0.82206	no
Jr02_08360_p1 (+3)	109011248	Q9SAJ4	VIT_19s0085g00370	Phosphoglycerate kinase 3, cytosolic	42570	1.70934e+08	1.8658e+08	1.93302e+08	1.83644e+08	1.7327e+08	1.71685e+08	1.83605e+08	1.762e+08	1.04203	0.0593974	up	0.632467	0.70881	no
Jr01_26010_p1	109008916	Q9SZQ5	VIT_11s0016g01730	WD repeat-containing protein VIP3	35974	1.29983e+06	1.13416e+06	1.27855e+06	1.03684e+06	1.27695e+06	1.24912e+06	1.23751e+06	1.18764e+06	1.042	0.0593499	up	0.696832	0.764566	no
Jr16_12830_p1	108989372	P42698	VIT_01s0011g00540	DNA-damage-repair/toleration protein DRT111, chloroplastic	42089	3.36194e+06	3.15682e+06	3.10598e+06	2.77961e+06	3.11339e+06	3.34452e+06	3.20824e+06	3.07918e+06	1.04192	0.0592398	up	0.648205	0.722518	no
Jr16_19820_p1	109013403	Q9LIN3	VIT_18s0166g00180	Glycine-rich RNA-binding protein RZ1A (AtRZ-1a)	22747	375245	473849	476671	420032	428433	424718	441922	424395	1.0413	0.0583851	up	0.728499	0.788809	no
Jr11_01560_p1 (+2)	109005683	P24704	VIT_14s0030g00830	Superoxide dismutase [Cu-Zn] 1	15310	7.66029e+07	8.97558e+07	1.1763e+08	9.32938e+07	8.51284e+07	9.43408e+07	9.4663e+07	9.0921e+07	1.04116	0.0581864	up	0.746675	0.802949	no
Jr01_22950_p1	#N/A	Q8RXD4	VIT_12s0028g00200	Protein BREAST CANCER SUSCEPTIBILITY 1 homolog (AtBRCA1)	31067	191367	205219	173505	190418	175779	181532	190030	182577	1.04083	0.0577278	up	0.749469	0.804391	no
Jr01_06040_p1	109019738	Q8H1Q2	VIT_14s0171g00460	Cytosolic Fe-S cluster assembly factor NBP35	38419	700826	758462	664920	677803	705827	658714	708069	680781	1.04008	0.0566987	up	0.692189	0.760485	no
Jr13_23880_p1	108989593	Q84WW2	VIT_16s0098g01200	Probable 6-phosphogluconolactonase 5, chloroplastic (6PGL 5)	35187	2.09901e+07	1.99042e+07	1.99031e+07	2.0238e+07	1.7546e+07	2.06708e+07	2.02658e+07	1.94849e+07	1.04007	0.0566864	up	0.647008	0.721428	no
Jr16_19380_p1	109002285	Q8L7G4	VIT_12s0034g01760	Terpenoid synthase 9 (AtTPS09)	20942	579031	615129	463467	536147	566393	491482	552542	531341	1.0399	0.0564486	up	0.744263	0.80114	no
Jr06_05160_p1	109001615	Q8VY07	VIT_04s0008g00640	Clathrin interactor EPSIN 1	60242	1.20185e+06	890685	1.34723e+06	873127	1.22343e+06	1.21145e+06	1.14659e+06	1.10267e+06	1.03983	0.0563463	up	0.794675	0.841661	no
Jr10_00360_p1	109001860	Q9SDS7	VIT_14s0068g01280	V-type proton ATPase subunit C (V-ATPase subunit C)	42893	466487	524326	420779	513868	435292	408410	470531	452524	1.03979	0.0562957	up	0.748713	0.804196	no
Jr16_07890_p1 (+1)	108987199	Q42565	VIT_01s0011g06260	Anthranilate synthase beta subunit 1, chloroplastic	36253	2.0911e+06	2.08924e+06	2.00864e+06	2.41077e+06	1.74729e+06	1.79491e+06	2.06299e+06	1.98432e+06	1.03965	0.0560922	up	0.732918	0.791513	no
Jr07_14610_p1	109008436	O23255	VIT_05s0029g00330	Adenosylhomocysteinase 1 (AdoHcyase 1)	53081	1.55971e+07	1.58899e+07	1.74894e+07	1.61249e+07	1.77369e+07	1.32736e+07	1.63255e+07	1.57118e+07	1.03906	0.0552766	up	0.706945	0.773345	no
Jr12_08290_p1	108993856	Q9LHE5	VIT_03s0097g00590	Mitochondrial import receptor subunit TOM40-1, N-terminally processed	34981	1.13736e+06	1.0648e+06	1.39082e+06	1.23285e+06	1.0609e+06	1.1642e+06	1.19766e+06	1.15265e+06	1.03905	0.0552684	up	0.73179	0.790554	no
Jr08_22650_p1	109017509	Q96255	VIT_00s2579g00010	Phosphoserine aminotransferase 1, chloroplastic (AtPSAT1)	47098	2.19564e+06	2.27163e+06	2.16267e+06	2.16498e+06	1.9948e+06	2.22216e+06	2.20998e+06	2.12731e+06	1.03886	0.0550014	up	0.65842	0.731615	no
Jr12_12790_p1 (+5)	109005855	Q94KE2	VIT_05s0020g03150	Protein TIME FOR COFFEE	170463	5567.99	6457.5	8619.43	6654.71	5770.92	7450.75	6881.64	6625.46	1.03867	0.0547214	up	0.837861	0.874197	no
Jr12_18940_p1 (+1)	109007840	Q8H151	VIT_09s0002g04170	Malonate--CoA ligase	47862	175918	198713	187979	173261	171338	197236	187537	180612	1.03834	0.0542797	up	0.766	0.817885	no
Jr08_21080_p1	#N/A	Q9SEI2	VIT_05s0020g01180	26S proteasome regulatory subunit 6A homolog A	47503	7.57747e+06	8.27145e+06	7.69498e+06	8.18865e+06	7.34126e+06	7.15938e+06	7.84797e+06	7.5631e+06	1.03767	0.0533427	up	0.657793	0.731226	no
Jr08_18530_p1	109019419	Q9LSM0	VIT_00s0218g00150	UDP-glycosyltransferase 91B1	53842	638181	604650	706699	580626	636153	662304	649844	626361	1.03749	0.0530982	up	0.725634	0.786417	no
Jr10_08230_p1	109007625	Q9XFM6	VIT_16s0100g01280	Membrane steroid-binding protein 1 (AtMP1)	23209	758897	765555	735026	718203	703768	755922	753159	725964	1.03746	0.0530564	up	0.698756	0.766167	no
Jr13_30620_p1	109010841	Q9FLX7	VIT_16s0050g01490	Probable NADH dehydrogenase [ubiquinone] 1 alpha subcomplex subunit 5, mitochondrial	19169	4.42447e+06	4.94213e+06	4.63327e+06	4.58529e+06	4.17447e+06	4.73535e+06	4.66663e+06	4.49837e+06	1.0374	0.0529786	up	0.660288	0.732521	no
Jr11_07780_p1	108992048	Q9SL42	VIT_04s0023g03190	Peptidyl-prolyl cis-trans isomerase Pin1 (PPIase Pin1)	13124	5.08217e+06	5.15246e+06	4.73868e+06	4.8105e+06	4.60733e+06	5.01627e+06	4.9911e+06	4.81137e+06	1.03736	0.0529123	up	0.645064	0.720234	no
Jr16_16410_p1	109006594	Q42564	VIT_03s0038g02320	L-ascorbate peroxidase 3 (AtAPx03)	31708	2.22746e+07	2.00306e+07	1.82252e+07	1.93963e+07	1.85955e+07	2.03882e+07	2.01768e+07	1.946e+07	1.03683	0.0521851	up	0.68588	0.754662	no
Jr08_21090_p1	109006848	P31265	VIT_14s0060g02270	Translationally-controlled tumor protein 1 (TCTP1)	19088	1.54433e+07	1.60563e+07	1.34712e+07	1.63392e+07	1.40064e+07	1.30406e+07	1.49903e+07	1.44621e+07	1.03652	0.0517508	up	0.716171	0.779042	no
Jr01_01380_p1	109001326	F4HRT5	VIT_14s0006g03280	Protein CROWDED NUCLEI 1	138198	463173	525762	438776	436866	465728	475550	475904	459381	1.03597	0.0509765	up	0.746638	0.802949	no
Jr09_13880_p1	108992648	Q9ZUC1	VIT_19s0014g01890	NADPH-dependent alkenal/one oxidoreductase, chloroplastic (AtAOR)	39447	265188	220559	248927	201243	246497	261529	244891	236423	1.03582	0.0507703	up	0.79296	0.840385	no
Jr14_21420_p1	109001676	Q9C523	VIT_06s0004g01000	Dirigent protein 19 (AtDIR19)	21603	1.17171e+06	1.0928e+06	1.64221e+06	1.35553e+06	1.23133e+06	1.18893e+06	1.30224e+06	1.2586e+06	1.03467	0.0491751	up	0.796801	0.843641	no
Jr14_05420_p1	108980573	Q9CAF4	VIT_13s0073g00630	Nuclear pore complex protein NUP1	142635	330111	251063	255990	231512	296202	281495	279054	269736	1.03454	0.0489963	up	0.809485	0.852416	no
Jr14_02540_p1 (+2)	109009227	Q9LVM5	VIT_09s0018g01180	5-hydroxyisourate hydrolase	42058	1.07815e+06	1.17229e+06	1.2326e+06	1.17992e+06	1.10662e+06	1.08065e+06	1.16101e+06	1.1224e+06	1.03441	0.0488022	up	0.723157	0.784816	no
Jr02_26150_p1	108985544	Q9FG71	VIT_19s0015g00910	ER membrane protein complex subunit 8/9 homolog	29007	994038	1.11958e+06	1.08698e+06	1.05241e+06	999197	1.0446e+06	1.06687e+06	1.03207e+06	1.03372	0.0478437	up	0.724997	0.786231	no
Jr09_16690_p1	#N/A	O03986	VIT_00s0194g00030	Heat shock protein 90-4 (AtHSP90.4; AtHsp90-4)	80134	2.01855e+07	2.06297e+07	2.3849e+07	2.34379e+07	2.28455e+07	1.63005e+07	2.15547e+07	2.08613e+07	1.03324	0.0471731	up	0.785936	0.83455	no
Jr13_25140_p1 (+2)	109003796	Q9ZSK1	VIT_16s0039g01410	Tocopherol O-methyltransferase, chloroplastic	37729	451645	398869	693449	450794	554014	489708	514654	498172	1.03309	0.0469601	up	0.844721	0.879685	no
Jr01_12930_p1	108998563	Q9ZV56	VIT_03s0017g01980	Choline-phosphate cytidylyltransferase 1 (AtCCT1)	37384	239035	273111	262270	302796	215857	230986	258139	249880	1.03305	0.0469115	up	0.816585	0.858028	no
Jr03_02130_p1 (+1)	109012189	Q9FG38	VIT_08s0007g02960	Sorting nexin 1 (AtSNX1)	46088	247600	250609	277506	215310	266144	269558	258572	250338	1.03289	0.0466894	up	0.799714	0.845911	no
Jr07_08000_p1 (+2)	#N/A	Q9LT08	VIT_18s0001g10820	26S proteasome non-ATPase regulatory subunit 14 homolog	34835	1.46708e+07	1.58867e+07	1.58569e+07	1.48827e+07	1.46466e+07	1.5418e+07	1.54715e+07	1.49824e+07	1.03264	0.0463397	up	0.683701	0.753168	no
Jr10_12960_p1	108991740	Q8LDV3	VIT_07s0005g05850	Uncharacterized protein At4g13200, chloroplastic	21407	1.87204e+06	1.41944e+06	1.60155e+06	1.35126e+06	1.51301e+06	1.876e+06	1.63101e+06	1.58009e+06	1.03222	0.0457572	up	0.801713	0.847173	no
Jr13_26510_p1	108988347	Q9C5C4	VIT_18s0001g03230	Acetylornithine deacetylase	48907	4.4321e+06	4.58918e+06	3.93953e+06	4.25289e+06	4.10852e+06	4.19798e+06	4.32027e+06	4.18647e+06	1.03196	0.045389	up	0.7059	0.772459	no
Jr16_04080_p1	108997275	Q9LFD5	VIT_16s0039g01860	Binding partner of ACD11 1	29288	4.8697e+06	5.38757e+06	4.50535e+06	4.94314e+06	4.63824e+06	4.72408e+06	4.92087e+06	4.76848e+06	1.03196	0.0453835	up	0.71284	0.776771	no
Jr07_00550_p1	109002459	Q9FJW4	VIT_07s0151g00490	NADH dehydrogenase [ubiquinone] iron-sulfur protein 4, mitochondrial	19540	4.00894e+06	3.18966e+06	4.18641e+06	3.47701e+06	3.57485e+06	3.98454e+06	3.795e+06	3.6788e+06	1.03159	0.0448658	up	0.764108	0.816369	no
Jr16_13890_p1_family	109003145	Q9LIP2	VIT_01s0010g02900	Proteasome subunit beta type-5-B	29268	8.52695e+06	9.32642e+06	9.1535e+06	1.0312e+07	8.35521e+06	7.51968e+06	9.00229e+06	8.72895e+06	1.03131	0.0444842	up	0.767368	0.818791	no
Jr13_28440_p1	109013150	Q9LDD1	VIT_01s0011g04140	Probable BOI-related E3 ubiquitin-protein ligase 3	75884	5.46497e+06	4.96393e+06	6.61648e+06	4.6115e+06	5.36759e+06	6.55116e+06	5.6818e+06	5.51008e+06	1.03116	0.0442728	up	0.803948	0.848211	no
Jr12_18070_p1_family	109007907	Q39247	VIT_09s0002g02470	Serine/threonine protein phosphatase 2A 55 kDa regulatory subunit B beta isoform (AtB beta; PP2A, subunit B, beta isoform)	57099	948736	1.0259e+06	968258	1.11375e+06	959371	781363	980966	951494	1.03097	0.0440086	up	0.797834	0.844464	no
Jr14_18100_p1	109000615	Q93WX6	VIT_06s0009g02300	Cysteine desulfurase 1, chloroplastic	52693	3.9896e+06	4.03309e+06	3.66518e+06	4.06353e+06	3.86344e+06	3.41459e+06	3.89596e+06	3.78052e+06	1.03053	0.0433931	up	0.734059	0.792226	no
Jr09_05220_p1	108994426	P0DI13	VIT_17s0000g01270	SUMO-activating enzyme subunit 1B-2	35916	386380	352962	301463	281643	377936	351520	346935	337033	1.02938	0.0417773	up	0.831178	0.868269	no
Jr02_23940_p1	108983831	Q9STS7	VIT_19s0177g00320	Chloroplastic lipocalin (AtCHL)	37380	6.06988e+06	6.22547e+06	5.39736e+06	6.30491e+06	5.50953e+06	5.37659e+06	5.89757e+06	5.73034e+06	1.02918	0.041499	up	0.748446	0.804196	no
Jr13_23530_p1	108994067	P49599	VIT_16s0098g01650	Protein phosphatase 2C 57 (AtPP2C57)	42690	555202	441898	436085	410755	536752	445167	477728	464225	1.02909	0.0413675	up	0.825587	0.864126	no
Jr03_23700_p1_family	#N/A	P22953	VIT_06s0004g04510	Probable mediator of RNA polymerase II transcription subunit 37e	71626	3.89315e+06	4.42176e+06	3.35565e+06	4.48946e+06	3.38986e+06	3.46152e+06	3.89019e+06	3.78028e+06	1.02907	0.0413462	up	0.808358	0.851974	no
Jr01_17840_p1 (+2)	109006042	Q9MAS5	VIT_07s0005g05790	Putative vesicle-associated membrane protein 726 (AtVAMP726)	24911	167859	202466	185753	267537	156034	116971	185360	180181	1.02874	0.0408846	up	0.897812	0.921578	no
Jr04_20570_p1 (+1)	109013514	Q9AST8	VIT_08s0032g01020	MD-2-related lipid-recognition protein ROSY1	16605	2.0042e+06	2.15359e+06	2.09052e+06	2.23015e+06	2.00972e+06	1.83974e+06	2.08277e+06	2.02654e+06	1.02775	0.0394867	up	0.77048	0.821313	no
Jr01_18180_p1	109006066	Q9MAU6	VIT_12s0059g01560	Protein disulfide-isomerase like 2-2 (AtPDIL2-2)	47913	9.32405e+06	1.02292e+07	9.23721e+06	9.70164e+06	9.15711e+06	9.16051e+06	9.59682e+06	9.33975e+06	1.02752	0.0391725	up	0.734532	0.792477	no
Jr06_00320_p1 (+3)	108993284	Q9C658	VIT_01s0011g02820	Protein decapping 5	68719	229818	175367	216068	153234	210107	241319	207084	201553	1.02744	0.0390569	up	0.868812	0.897247	no
Jr06_02460_p1	109005408	O49292	VIT_18s0001g15360	PsbP domain-containing protein 4, chloroplastic	29906	2.28618e+06	2.05574e+06	2.14835e+06	2.09569e+06	2.03633e+06	2.18566e+06	2.16342e+06	2.10589e+06	1.02732	0.0388837	up	0.756005	0.809549	no
Jr07_32460_p1	109008256	Q9SZ53	VIT_04s0008g06720	Probable protein phosphatase 2C 60 (AtPP2C60)	44147	1.97237e+06	1.93685e+06	1.85989e+06	1.85843e+06	1.87687e+06	1.88344e+06	1.92304e+06	1.87291e+06	1.02676	0.0381022	up	0.754711	0.808514	no
Jr15_10210_p1	109000426	Q42029	VIT_12s0028g01080	Oxygen-evolving enhancer protein 2-1, chloroplastic (OEE2)	28228	1.6262e+08	1.69678e+08	1.29801e+08	1.66004e+08	1.28327e+08	1.56068e+08	1.54033e+08	1.50133e+08	1.02598	0.0370019	up	0.824264	0.863016	no
Jr09_09790_p1	108993767	P42697	VIT_02s0025g01570	Dynamin-related protein 1A	68331	1.30564e+06	1.33871e+06	1.01861e+06	1.28162e+06	1.09764e+06	1.19101e+06	1.22098e+06	1.19009e+06	1.02596	0.0369771	up	0.821695	0.861756	no
Jr02_00780_p1	108996161	P17597	VIT_14s0068g01960	Acetolactate synthase, chloroplastic (AtALS)	71712	684196	717121	716183	613050	734775	716399	705833	688074	1.02581	0.036763	up	0.805234	0.849296	no
Jr02_03020_p1 (+1)	109003864	Q9SB63	VIT_17s0000g08810	Protein MODIFIER OF SNC1 1	172148	222498	180328	210506	179237	210368	208540	204444	199382	1.02539	0.0361721	up	0.849225	0.882646	no
Jr12_15690_p1	109005062	O23714	VIT_07s0151g00690	Proteasome subunit beta type-2-A	28516	1.38179e+06	1.38499e+06	1.52708e+06	1.73198e+06	1.15812e+06	1.29794e+06	1.43129e+06	1.39601e+06	1.02527	0.0360035	up	0.844291	0.879515	no
Jr13_05750_p1	109007002	Q8W3M7	VIT_12s0035g00620	Uncharacterized protein At4g06598	42306	201825	243316	220202	204719	220739	223671	221781	216376	1.02498	0.035594	up	0.842386	0.878085	no
Jr11_17890_p1	109007722	Q9SYP2	VIT_18s0122g00510	Pyrophosphate--fructose 6-phosphate 1-phosphotransferase subunit alpha 1 (PFP 1)	67733	2.11027e+06	2.03797e+06	2.31847e+06	2.22126e+06	2.26133e+06	1.82733e+06	2.15557e+06	2.10331e+06	1.02485	0.0354104	up	0.807439	0.85135	no
Jr06_03610_p1	109003048	Q9LMT8	VIT_18s0001g02050	Homeobox-leucine zipper protein HDG12	79001	1.05775e+07	1.10924e+07	1.13444e+07	1.15803e+07	1.00615e+07	1.05792e+07	1.10048e+07	1.07403e+07	1.02462	0.0350915	up	0.768031	0.819233	no
Jr12_02320_p1	108997568	Q9FN03	VIT_12s0057g01540	Ultraviolet-B receptor UVR8	46266	724955	804962	918173	852954	752175	784318	816030	796482	1.02454	0.0349789	up	0.823837	0.863016	no
Jr01_15670_p1	109005359	Q9SJ12	VIT_07s0031g01740	Probable ATP synthase 24 kDa subunit, mitochondrial	27659	2.85875e+07	3.02555e+07	3.10734e+07	3.06296e+07	2.72506e+07	2.99053e+07	2.99721e+07	2.92618e+07	1.02427	0.0346024	up	0.773012	0.82348	no
Jr07_04260_p1	108987182	Q9SCN8	VIT_04s0023g01900	Cell division control protein 48 homolog D (AtCDC48d)	69983	413650	445284	424572	458788	400352	394086	427835	417742	1.02416	0.0344415	up	0.827186	0.86525	no
Jr08_00750_p1	109001005	P52032	VIT_04s0008g06780	Phospholipid hydroperoxide glutathione peroxidase 1, chloroplastic (PHGPx)	26632	3.82942e+06	3.0665e+06	3.13327e+06	3.02754e+06	2.8565e+06	3.91284e+06	3.34306e+06	3.26563e+06	1.02371	0.0338102	up	0.843934	0.879421	no
Jr04_19440_p1	108981747	Q9SMR2	VIT_08s0007g06190	Tubulin-folding cofactor C (AtTFCC; TFC C)	62944	74763.2	75404.5	69569	89981.8	71532.3	53239.1	73245.6	71584.4	1.02321	0.0330965	up	0.89574	0.919738	no
Jr01_28930_p1	108992686	Q6NQH9	VIT_11s0016g04410	Polyadenylate-binding protein-interacting protein 6 (PABP-interacting protein 6; Poly(A)-binding protein-interacting protein 6)	20933	412111	378771	362544	363728	367603	396020	384476	375784	1.02313	0.03299	up	0.835107	0.8716	no
Jr09_15090_p1	108993551	P25269	VIT_19s0177g00310	Tryptophan synthase beta chain 2, chloroplastic	50397	5.45217e+06	6.04212e+06	5.79174e+06	5.83714e+06	5.66753e+06	5.39807e+06	5.76201e+06	5.63425e+06	1.02268	0.0323493	up	0.779385	0.828662	no
Jr01_32450_p1	108995997	Q941D5	VIT_07s0005g03720	Vacuolar protein sorting-associated protein 2 homolog 3 (AtVPS2-3)	23189	1.28687e+06	1.16666e+06	1.3069e+06	1.36041e+06	1.14829e+06	1.17233e+06	1.25348e+06	1.22701e+06	1.02157	0.0307908	up	0.831388	0.868269	no
Jr14_06270_p1	109008515	Q38935	VIT_00s0260g00060	Peptidyl-prolyl cis-trans isomerase FKBP15-1 (PPIase FKBP15-1)	16626	1.5131e+07	1.5777e+07	1.80029e+07	1.68506e+07	1.51197e+07	1.59106e+07	1.63036e+07	1.59603e+07	1.02151	0.0307051	up	0.809315	0.852416	no
Jr08_08880_p1	109011235	Q9FHW7	VIT_18s0001g14860	SKP1-like protein 1B	17826	5.39214e+06	5.18883e+06	5.88435e+06	5.31537e+06	5.4902e+06	5.31478e+06	5.48844e+06	5.37345e+06	1.0214	0.0305464	up	0.792336	0.84012	no
Jr13_05950_p1	109002334	Q8VY06	VIT_03s0063g00680	Presequence protease 2, chloroplastic/mitochondrial (AtPreP2; PreP 2)	121770	625184	590513	651171	674403	644174	509225	622289	609268	1.02137	0.0305096	up	0.85594	0.886269	no
Jr02_04780_p1	108999216	Q9FLX9	VIT_17s0000g05650	Notchless protein homolog	20570	1.0969e+07	1.00985e+07	1.16139e+07	1.16466e+07	1.00217e+07	1.0338e+07	1.08938e+07	1.06688e+07	1.02109	0.0301073	up	0.811937	0.854725	no
Jr02_17970_p1	109014460	Q8LBU2	VIT_02s0025g03590	Probable glutathione peroxidase 8	23327	4.54908e+06	5.25091e+06	5.19801e+06	4.88048e+06	4.43815e+06	5.37156e+06	4.99933e+06	4.89673e+06	1.02095	0.0299171	up	0.821753	0.861756	no
Jr01_00310_p1 (+1)	109013176	Q9LU10	VIT_14s0108g00580	Protease Do-like 8, chloroplastic	48483	3.03221e+06	3.27693e+06	2.85883e+06	3.02501e+06	2.77805e+06	3.17719e+06	3.05599e+06	2.99342e+06	1.0209	0.0298448	up	0.816527	0.858028	no
Jr02_02890_p1	109003849	Q9ZSZ8	VIT_17s0000g08940	FKBP12-interacting protein of 37 kDa (FIP-37)	39132	375992	389283	377510	431471	329990	358089	380928	373184	1.02075	0.0296338	up	0.864365	0.893927	no
Jr16_20700_p1	108995725	Q8H183	VIT_03s0017g00550	Beta-ureidopropionase	46762	1.32623e+06	1.67044e+06	1.37339e+06	1.48896e+06	1.47828e+06	1.31424e+06	1.45669e+06	1.42716e+06	1.02069	0.0295397	up	0.847095	0.881495	no
Jr01_27510_p1_family	109010092	Q42418	VIT_04s0008g00490	Profilin-2	14165	1.40197e+07	1.62819e+07	1.41952e+07	1.66933e+07	1.30818e+07	1.38351e+07	1.48323e+07	1.45367e+07	1.02033	0.0290356	up	0.840971	0.877165	no
Jr03_17300_p1	108981445	Q9SVG3	VIT_10s0003g05470	Berberine bridge enzyme-like 21 (AtBBE-like 21)	61575	516324	501761	503969	545253	459155	487321	507352	497243	1.02033	0.029035	up	0.84944	0.882646	no
Jr08_01510_p1	#N/A	Q56XG6	VIT_09s0002g06660	DEAD-box ATP-dependent RNA helicase 15	48245	866086	1.22505e+06	1.30669e+06	694196	1.36721e+06	1.27218e+06	1.13261e+06	1.11119e+06	1.01927	0.0275365	up	0.92385	0.942144	no
Jr13_04850_p1	#N/A	P53492	VIT_12s0178g00200	Actin-7	41531	1.08656e+06	1.20258e+06	1.20652e+06	1.25819e+06	1.05701e+06	1.11702e+06	1.16522e+06	1.14408e+06	1.01848	0.0264222	up	0.854704	0.886269	no
Jr13_07600_p1	108981084	P55231	VIT_03s0038g04570	Glucose-1-phosphate adenylyltransferase large subunit 3, chloroplastic	58099	207768	231842	474933	316708	329062	252539	304848	299436	1.01807	0.0258395	up	0.93874	0.953787	no
Jr08_12480_p1	109019899	Q8GW48	VIT_07s0005g00120	Heat shock factor-binding protein (AtHSBP)	12403	3.49792e+06	3.19656e+06	3.75059e+06	3.22042e+06	3.38663e+06	3.65368e+06	3.48169e+06	3.42024e+06	1.01797	0.0256893	up	0.841865	0.877819	no
Jr03_09390_p1	#N/A	Q8L4A7	VIT_01s0011g01960	Proteasome subunit alpha type-2-B	30544	4.23036e+07	4.38759e+07	4.44145e+07	4.50127e+07	4.06069e+07	4.26726e+07	4.35313e+07	4.27641e+07	1.01794	0.0256546	up	0.827185	0.86525	no
Jr12_19360_p1	109009147	Q9C829	VIT_09s0002g04830	Nuclear pore complex protein NUP50A	42757	1.32838e+06	1.35228e+06	1.41077e+06	1.23259e+06	1.38261e+06	1.40561e+06	1.36381e+06	1.34027e+06	1.01757	0.0251215	up	0.851888	0.884428	no
Jr09_11550_p1	108997126	F4JPR7	VIT_02s0025g04050	Plant UBX domain-containing protein 8 (PUX8)	66053	1.88295e+06	2.24374e+06	1.96681e+06	2.11844e+06	1.93267e+06	1.94605e+06	2.03116e+06	1.99905e+06	1.01606	0.0229903	up	0.86605	0.894827	no
Jr04_13220_p1 (+1)	#N/A	Q9M0M5	No Vitis hit	Scarecrow-like protein 13 (AtSCL13)	19976	655809	750092	695952	654763	725319	688607	700617	689563	1.01603	0.022944	up	0.874491	0.902418	no
Jr06_11800_p1 (+1)	108982664	Q9SRZ6	VIT_04s0079g00530	Cytosolic isocitrate dehydrogenase [NADP]	46879	198758	151816	199818	164562	195744	181489	183464	180598	1.01587	0.0227106	up	0.911484	0.932596	no
Jr11_13150_p1_family	109009803	Q9ZT91	VIT_07s0104g00600	Elongation factor Tu, mitochondrial	49031	2.03364e+07	2.07193e+07	2.20383e+07	2.04604e+07	1.99502e+07	2.17147e+07	2.10314e+07	2.07085e+07	1.01559	0.0223222	up	0.847262	0.881495	no
Jr07_26920_p1 (+5)	109005420	Q8H173	VIT_09s0002g00610	40S ribosomal protein Sa-2	33543	679383	872398	702727	592029	776193	852264	751503	740162	1.01532	0.0219366	up	0.911014	0.932516	no
Jr11_15670_p1	108980698	O22263	VIT_12s0059g01560	Protein disulfide-isomerase like 2-1 (AtPDIL2-1)	45232	1.28005e+07	1.28778e+07	1.14028e+07	1.27511e+07	1.17616e+07	1.20158e+07	1.23603e+07	1.21761e+07	1.01513	0.0216622	up	0.855829	0.886269	no
Jr02_26050_p1 (+1)	108985462	Q9LVQ4	VIT_19s0015g00740	WEB family protein At5g55860	72121	2.40234e+06	2.47141e+06	2.40966e+06	2.06728e+06	2.56739e+06	2.54042e+06	2.42781e+06	2.3917e+06	1.0151	0.021619	up	0.876762	0.904479	no
Jr08_06470_p1	108981796	Q01525	VIT_18s0001g06330	14-3-3-like protein GF14 omega	29383	3.25245e+06	3.5824e+06	3.96161e+06	3.79962e+06	3.47929e+06	3.3659e+06	3.59882e+06	3.54827e+06	1.01425	0.0204078	up	0.878219	0.905414	no
Jr11_30690_p1	#N/A	Q9LTX9	VIT_17s0000g03310	Heat shock 70 kDa protein 7, chloroplastic	74384	1.89326e+06	2.29906e+06	2.03749e+06	2.29041e+06	2.06954e+06	1.78283e+06	2.0766e+06	2.04759e+06	1.01417	0.0202974	up	0.895693	0.919738	no
Jr01_27290_p1_family	109010274	O82197	VIT_04s0008g00630	Vacuolar protein sorting-associated protein 32 homolog 1 (AtVPS32-1)	24241	4.27916e+06	3.35456e+06	4.23441e+06	3.393e+06	4.10112e+06	4.21078e+06	3.95604e+06	3.90163e+06	1.01395	0.0199798	up	0.898307	0.921799	no
Jr13_18120_p1_family	109010122	O80763	VIT_01s0127g00560	Probable nucleoredoxin 1 (AtNrx1)	63756	2.6691e+07	2.6754e+07	2.5986e+07	2.94296e+07	2.53418e+07	2.35879e+07	2.6477e+07	2.61197e+07	1.01368	0.0195977	up	0.881233	0.907669	no
Jr07_02950_p1	108995363	P60838	VIT_00s0207g00240	Disease resistance protein SUMM2	51400	439876	445157	452523	425076	441303	453241	445852	439873	1.01359	0.0194763	up	0.894861	0.919695	no
Jr12_10090_p1 (+4)	108994783	O04425	VIT_05s0077g00710	Flowering time control protein FCA	77565	30515.4	25938.6	35706.5	13886.9	40712.2	36381.4	30720.2	30326.9	1.01297	0.01859	up	0.963645	0.972795	no
Jr07_14420_p1	109020582	Q9SCV3	VIT_11s0016g02200	Beta-galactosidase 9 (Lactase 9)	29156	872490	770947	813629	848944	842735	737518	819022	809732	1.01147	0.0164573	up	0.910794	0.932516	no
Jr01_03390_p1	#N/A	Q9FKA5	VIT_14s0108g01160	Uncharacterized protein At5g39570	47804	3.04294e+07	2.8175e+07	3.3052e+07	2.61162e+07	3.10176e+07	3.35089e+07	3.05521e+07	3.02142e+07	1.01118	0.0160443	up	0.911658	0.932596	no
Jr14_19490_p1	108998748	Q39195	VIT_13s0064g00670	Photosystem II 5 kDa protein, chloroplastic (PSII-T)	15027	4.50001e+06	3.28552e+06	3.05858e+06	2.86575e+06	2.87401e+06	4.98493e+06	3.6147e+06	3.5749e+06	1.01114	0.0159764	up	0.951707	0.964584	no
Jr16_07380_p1	108993467	Q9ZUM0	VIT_01s0010g01770	Zinc finger CCCH domain-containing protein 17 (AtC3H17)	84102	117216	146995	90918.1	118738	120488	112245	118377	117157	1.01041	0.0149384	up	0.949614	0.962759	no
Jr10_08030_p1	108979160	Q93WL3	VIT_16s0022g01840	ATP-dependent Clp protease ATP-binding subunit CLPT1, chloroplastic	26999	1.75485e+06	1.02071e+06	1.08573e+06	1.24905e+06	1.05211e+06	1.52263e+06	1.2871e+06	1.2746e+06	1.00981	0.0140793	up	0.955571	0.967592	no
Jr04_10990_p1	108990178	Q9LJ98	VIT_10s0003g03260	Probable prefoldin subunit 2	14896	1.62896e+06	1.76666e+06	1.88662e+06	1.72586e+06	1.53205e+06	1.97338e+06	1.76075e+06	1.74376e+06	1.00974	0.0139813	up	0.926658	0.944131	no
Jr11_03090_p1 (+1)	109012743	Q3E6S8	VIT_14s0060g02370	Putative protease Do-like 14	46500	269311	357502	293766	339104	277847	294880	306860	303944	1.00959	0.0137744	up	0.942887	0.957411	no
Jr07_18390_p1	108987293	Q9M7Z1	VIT_05s0077g02080	Lipoamide acyltransferase component of branched-chain alpha-keto acid dehydrogenase complex, mitochondrial	57252	3.1618e+06	3.01467e+06	3.08744e+06	3.09707e+06	3.02869e+06	3.06055e+06	3.08797e+06	3.0621e+06	1.00845	0.0121353	up	0.915995	0.936451	no
Jr07_25110_p1	109013651	O22822	VIT_05s0094g00990	UDP-glycosyltransferase 74F2	52395	1.0261e+07	1.15631e+07	1.25955e+07	1.29582e+07	1.19685e+07	9.23032e+06	1.14732e+07	1.13857e+07	1.00769	0.0110454	up	0.946807	0.960503	no
Jr08_22610_p1	109017518	Q9SEY5	VIT_18s0122g01440	Probable acyl-activating enzyme 2	65202	77226.3	62252.5	65650.5	64981.4	68228.4	70516.6	68376.4	67908.8	1.00689	0.00990217	up	0.962088	0.971521	no
Jr07_34150_p1	108983459	O22703	VIT_13s0019g05080	Glycine-rich RNA-binding protein RZ1B (AtRZ-1a)	30026	286456	387669	282912	374589	280973	295134	319012	316899	1.00667	0.00959028	up	0.964403	0.972964	no
Jr07_33110_p1	109010324	Q9FVC8	VIT_15s0048g00750	4-hydroxy-tetrahydrodipicolinate synthase 2, chloroplastic (HTPA synthase 2)	39503	2.11069e+06	2.16054e+06	2.18794e+06	2.03121e+06	2.17728e+06	2.20842e+06	2.15306e+06	2.13897e+06	1.00659	0.00947191	up	0.938264	0.953714	no
Jr11_15640_p1	108979049	Q05728	VIT_07s0005g01170	Phosphoribosylformylglycinamidine cyclo-ligase, chloroplastic	42205	1.53436e+06	1.6653e+06	1.67899e+06	1.84943e+06	1.57024e+06	1.42998e+06	1.62622e+06	1.61655e+06	1.00598	0.00860051	up	0.954423	0.967039	no
Jr_Scaffold_698_00030_p1	#N/A	P24704	VIT_14s0030g00830	Superoxide dismutase [Cu-Zn] 1	15281	5.719e+06	7.89914e+06	9.31758e+06	8.4952e+06	6.82358e+06	7.49006e+06	7.64524e+06	7.60295e+06	1.00556	0.00800321	up	0.967768	0.975761	no
Jr15_05300_p1	108992347	Q9SX77	VIT_18s0001g10780	Succinate dehydrogenase subunit 5, mitochondrial	26947	3.75802e+06	3.57352e+06	4.496e+06	4.00187e+06	3.72172e+06	4.04159e+06	3.94251e+06	3.92173e+06	1.0053	0.00762654	up	0.955487	0.967592	no
Jr09_05090_p1	108994291	Q9SW33	VIT_17s0000g01170	Thylakoid lumenal 17.9 kDa protein, chloroplastic	25297	306042	298339	302272	319276	276306	306463	302217	300682	1.00511	0.0073506	up	0.964326	0.972964	no
Jr15_12630_p1	108993170	Q944P7	VIT_11s0037g00180	Leucine aminopeptidase 2, chloroplastic	60395	5.03835e+06	5.88089e+06	6.12838e+06	6.0667e+06	5.32135e+06	5.5839e+06	5.68254e+06	5.65732e+06	1.00446	0.00641871	up	0.961212	0.971521	no
Jr03_05050_p1	109005250	Q9C5Z3	VIT_00s0252g00070	Eukaryotic translation initiation factor 3 subunit E (AtEIF3E-1; eIF3e; p48)	51300	44360.2	43894.6	53862.5	42550.8	55250	43735.2	47372.4	47178.7	1.00411	0.0059127	up	0.979564	0.984642	no
Jr13_09250_p1	108993405	Q9LNU4	VIT_03s0038g02590	26S proteasome non-ATPase regulatory subunit 3 homolog A	55507	79312.1	51180.3	88378.3	64079	91403.7	62519.2	72956.9	72667.3	1.00399	0.00573919	up	0.984338	0.988236	no
Jr07_28420_p1	108991289	Q9C717	VIT_09s0002g02070	Protein FLX-like 3 (AtFLXL3)	31846	158058	100497	191554	59571.7	183601	205259	150036	149477	1.00374	0.00538476	up	0.990824	0.992631	no
Jr16_14410_p1 (+1)	108985467	Q9FT92	VIT_14s0068g01650	Uncharacterized protein At5g08430	176342	34499.5	52675.5	42362.3	37830.1	44853.3	46378.6	43179.1	43020.7	1.00368	0.00530065	up	0.983018	0.987512	no
Jr09_12440_p1	108999267	Q8VWG7	VIT_00s0323g00030	TPR repeat-containing thioredoxin TDX	43109	5.96428e+06	5.88199e+06	6.25743e+06	5.59854e+06	6.09735e+06	6.34963e+06	6.03457e+06	6.01517e+06	1.00322	0.00464374	up	0.968339	0.976038	no
Jr08_05750_p1	108983310	P54150	VIT_16s0013g00620	Peptide methionine sulfoxide reductase A4, chloroplastic (AtMSRA4)	29227	5.61626e+06	5.05075e+06	5.42201e+06	4.26116e+06	5.71083e+06	6.06631e+06	5.363e+06	5.3461e+06	1.00316	0.00455543	up	0.977457	0.982824	no
Jr09_04440_p1	108986589	O64903	VIT_17s0000g10280	Nucleoside diphosphate kinase II, chloroplastic (NDK II; NDP kinase II; NDPK II; NDPK Ia)	29248	3.40749e+06	3.42407e+06	3.14483e+06	3.49642e+06	3.04223e+06	3.41006e+06	3.32546e+06	3.31624e+06	1.00278	0.0040083	up	0.974432	0.981579	no
Jr13_01160_p1	108996356	Q94JT5	VIT_03s0180g00080	Cyclase-like protein 2	30571	2.48293e+06	2.20332e+06	2.78168e+06	2.50042e+06	2.42019e+06	2.52675e+06	2.48931e+06	2.48245e+06	1.00276	0.00398176	up	0.976986	0.98265	no
Jr13_09900_p1	108982732	Q9SL48	VIT_03s0038g03110	SEC1 family transport protein SLY1 (AtSLY1)	68388	212595	190129	170595	200191	175389	196356	191106	190645	1.00242	0.00348612	up	0.985301	0.988901	no
Jr13_12780_p1	108982519	P51413	VIT_01s0010g03370	60S ribosomal protein L17-2	22324	304613	288152	371650	405793	285803	270803	321471	320799	1.00209	0.00301886	up	0.989258	0.991363	no
Jr04_22190_p1	109005161	Q949U7	VIT_08s0007g03970	Peroxiredoxin-2E, chloroplastic	24450	1.79541e+06	1.46981e+06	1.36062e+06	1.39592e+06	1.50878e+06	1.71257e+06	1.54194e+06	1.53909e+06	1.00185	0.00267327	up	0.987097	0.989498	no
Jr16_03920_p1	#N/A	Q8L7F7	VIT_15s0021g02200	Nuclear pore complex protein NUP62	74649	703424	767151	828214	465259	877818	952335	766263	765137	1.00147	0.00212097	up	0.993789	0.994996	no
Jr07_19350_p1	108995042	O04652	VIT_05s0020g01980	Acyl carrier protein 5, chloroplastic	20519	4.13672e+06	4.25757e+06	4.31333e+06	4.74e+06	3.89946e+06	4.04953e+06	4.23588e+06	4.22966e+06	1.00147	0.00211722	up	0.986762	0.989463	no
Jr12_24930_p1	109004758	Q9SPE6	VIT_13s0067g02210	Alpha-soluble NSF attachment protein 2 (Alpha-SNAP2)	32788	884939	962534	804481	1.03971e+06	846384	762982	883985	883025	1.00109	0.00156658	up	0.99278	0.994288	no
Jr09_04620_p1	108983966	O82514	VIT_17s0000g01730	Adenylate kinase 4 (AK 4)	26918	4.7923e+06	3.8983e+06	4.9224e+06	3.86503e+06	4.56467e+06	5.17496e+06	4.53767e+06	4.53489e+06	1.00061	0.000884779	up	0.995617	0.996221	no
Jr01_10480_p1	108988159	Q42290	VIT_14s0108g01650	Probable mitochondrial-processing peptidase subunit beta, mitochondrial	58757	4.32253e+06	4.67082e+06	4.72674e+06	4.83889e+06	4.70158e+06	4.17533e+06	4.57336e+06	4.57193e+06	1.00031	0.000450764	up	0.997056	0.997358	no
Jr06_09260_p1	109008284	Q9FWR5	VIT_18s0001g12730	Gamma carbonic anhydrase 1, mitochondrial (AtCA1; GAMMA CA1)	33310	2.63212e+06	2.5648e+06	2.68874e+06	2.58639e+06	2.56367e+06	2.73773e+06	2.62856e+06	2.62927e+06	-1.00027	-0.000389625	down	0.997388	0.997388	no
Jr09_10630_p1 (+1)	108997427	P92947	VIT_02s0025g00340	Monodehydroascorbate reductase, chloroplastic/mitochondrial	55912	1.6023e+07	1.63447e+07	1.51888e+07	1.66723e+07	1.51103e+07	1.57973e+07	1.58522e+07	1.586e+07	-1.00049	-0.000709372	down	0.995106	0.996013	no
Jr12_00400_p1	108988557	Q7XA74	VIT_07s0129g00310	Inactive GDSL esterase/lipase-like protein 25	49732	3.57253e+06	3.31621e+06	2.99054e+06	3.44874e+06	3.25399e+06	3.19171e+06	3.2931e+06	3.29815e+06	-1.00153	-0.00220985	down	0.986226	0.989227	no
Jr12_19230_p1	109006102	F4HQD4	VIT_09s0002g04680	Heat shock 70 kDa protein 15	94974	4.93509e+06	4.90345e+06	4.91642e+06	4.92376e+06	5.48302e+06	4.37548e+06	4.91832e+06	4.92742e+06	-1.00185	-0.00266653	down	0.983475	0.98767	no
Jr12_14030_p1	108981095	Q9ZUU4	VIT_05s0049g01930	RNA-binding protein CP29B, chloroplastic	34910	261350	273326	256434	277803	268375	246564	263703	264247	-1.00206	-0.00297443	down	0.985809	0.98911	no
Jr13_03130_p1 (+3)	109021635	Q9FGF0	VIT_18s0001g08030	Phosphoglycerate mutase-like protein 1	40791	1.2384e+06	1.1368e+06	1.09071e+06	1.16982e+06	1.15361e+06	1.15004e+06	1.1553e+06	1.15782e+06	-1.00218	-0.00314784	down	0.981294	0.986081	no
Jr05_06130_p1	109002408	Q9SEI4	VIT_06s0004g08220	26S proteasome regulatory subunit 6B homolog	51075	2.79382e+06	3.09572e+06	3.09182e+06	2.99402e+06	2.94993e+06	3.05993e+06	2.99378e+06	3.0013e+06	-1.00251	-0.00361554	down	0.976022	0.981981	no
Jr14_15990_p1	109002476	Q67Z52	VIT_08s0007g05420	Tubulin-folding cofactor B (AtTFCB)	27025	717255	740812	840032	769206	784505	751462	766033	768391	-1.00308	-0.00443407	down	0.975506	0.981762	no
Jr04_14250_p1	109019725	Q9SAB3	VIT_19s0090g00280	Polyadenylate-binding protein RBP45B (Poly(A)-binding protein RBP45B)	48892	258977	218056	260346	238327	244366	257531	245793	246741	-1.00386	-0.0055534	down	0.974893	0.981586	no
Jr01_11120_p1 (+4)	108987390	Q6NMK6	VIT_16s0022g00980	Probable UMP-CMP kinase 2	26651	76361	103858	86480.6	81434.1	92149.7	94382.5	88899.8	89322.1	-1.00475	-0.00683804	down	0.975034	0.981586	no
Jr05_02140_p1	108989755	O80501	VIT_15s0021g00640	Ras-related protein RABH1b (AtRABH1b)	23037	86042.8	106865	94640.4	117043	96387.2	75732.8	95849.4	96387.6	-1.00561	-0.00807826	down	0.973206	0.980644	no
Jr04_00230_p1	108990014	Q9ZVI9	VIT_08s0056g00120	Ethanolamine-phosphate cytidylyltransferase	46023	226407	232468	220471	241188	225210	216794	226449	227731	-1.00566	-0.00814571	down	0.961795	0.971521	no
Jr04_16020_p1	108998404	Q9M040	VIT_10s0003g00990	Pyruvate decarboxylase 4 (AtPDC4)	63047	1.79587e+06	1.90049e+06	1.93962e+06	2.40003e+06	1.76906e+06	1.49997e+06	1.87866e+06	1.88969e+06	-1.00587	-0.00844239	down	0.965123	0.973392	no
Jr07_24990_p1_family	108984606	O22832	VIT_00s0499g00030	Stearoyl-[acyl-carrier-protein] 9-desaturase 7, chloroplastic (Stearoyl-ACP desaturase 7)	45159	1.70292e+06	1.82723e+06	1.9201e+06	2.20488e+06	1.73468e+06	1.54383e+06	1.81675e+06	1.8278e+06	-1.00608	-0.00874716	down	0.958907	0.969793	no
Jr04_14890_p1	109011552	Q8LDI5	VIT_00s0532g00030	Thioredoxin-like protein CXXS1 (AtCXXS1)	14161	3.06012e+06	3.92888e+06	3.5255e+06	2.8781e+06	3.87771e+06	3.82751e+06	3.50483e+06	3.52777e+06	-1.00655	-0.00941228	down	0.955849	0.967592	no
Jr10_17190_p1 (+2)	109003899	Q9SHJ8	VIT_12s0028g00590	3-hydroxyisobutyryl-CoA hydrolase-like protein 5	43347	1.59247e+06	1.34419e+06	1.57441e+06	1.3684e+06	1.67596e+06	1.4995e+06	1.50369e+06	1.51462e+06	-1.00727	-0.010446	down	0.944777	0.958739	no
Jr04_05280_p1	#N/A	Q56WH1	VIT_06s0004g00480	Tubulin alpha-3 chain	49599	136681	182406	178405	168192	188006	145039	165831	167079	-1.00753	-0.0108174	down	0.959986	0.970587	no
Jr07_13740_p1 (+1)	109004052	P48641	VIT_05s0051g00870	Glutathione reductase, cytosolic (GR; GRase)	53483	1.01651e+07	1.0658e+07	9.92369e+06	1.06445e+07	1.04283e+07	9.91025e+06	1.02489e+07	1.03277e+07	-1.00768	-0.0110446	down	0.922044	0.94087	no
Jr01_04790_p1	109007251	Q9S7G6	VIT_14s0066g00920	Polyribonucleotide nucleotidyltransferase 2, mitochondrial (AtmtPNPase)	106001	32512.1	24302.2	23517.2	24143.6	29754.2	27082	26777.2	26993.3	-1.00807	-0.0115914	down	0.961824	0.971521	no
Jr03_19740_p1	#N/A	O23715	VIT_08s0040g00410	Proteasome subunit alpha type-3	27358	2.92645e+06	2.98082e+06	2.86777e+06	3.1728e+06	2.83931e+06	2.83998e+06	2.92502e+06	2.9507e+06	-1.00878	-0.0126108	down	0.917489	0.936943	no
Jr12_04420_p1	108998105	O82357	VIT_15s0046g02170	3-methyl-2-oxobutanoate hydroxymethyltransferase 1, mitochondrial	37880	2.92775e+06	3.52041e+06	3.38979e+06	3.02642e+06	3.48225e+06	3.41649e+06	3.27932e+06	3.30839e+06	-1.00886	-0.0127318	down	0.925486	0.943229	no
Jr08_11610_p1	109008298	Q9LZK5	VIT_07s0005g01220	DnaJ protein ERDJ3B	39148	286171	277413	274311	277380	289818	278176	279298	281791	-1.00893	-0.0128205	down	0.936594	0.952488	no
Jr03_08180_p1 (+2)	109004419	P16127	VIT_10s0003g00890	Magnesium-chelatase subunit ChlI-1, chloroplastic (Mg-chelatase subunit I-1)	52753	37193.2	35011.6	24572.3	29942.8	33358.5	34344.8	32259.1	32548.7	-1.00898	-0.0128949	down	0.958557	0.969738	no
Jr14_09910_p1	109007404	Q9ZW34	VIT_06s0004g05900	Cytosolic enolase 3	51824	994604	1.05137e+06	1.0338e+06	953391	1.07478e+06	1.07973e+06	1.02659e+06	1.03597e+06	-1.00913	-0.0131156	down	0.924205	0.942214	no
Jr01_02420_p1	109001418	Q9T0G2	VIT_18s0001g05810	Cytochrome c-2	12404	3.97236e+06	3.48864e+06	3.5201e+06	4.09782e+06	3.38068e+06	3.61082e+06	3.66036e+06	3.69644e+06	-1.00986	-0.0141505	down	0.916355	0.936529	no
Jr11_14650_p1	108986860	Q8LGG8	VIT_07s0005g00290	Universal stress protein A-like protein	17265	561220	534002	590384	352154	643042	707215	561869	567471	-1.00997	-0.0143124	down	0.957048	0.968508	no
Jr12_14110_p1	108981155	O22785	VIT_05s0049g01840	Pre-mRNA-processing factor 19 homolog 2	56901	86704.6	101698	92538.9	93952.2	104315	85552.6	93647.3	94606.6	-1.01024	-0.0147037	down	0.942849	0.957411	no
Jr10_21290_p1	109004652	Q56YU0	VIT_17s0000g08070	Aldehyde dehydrogenase family 2 member C4	54194	101633	113327	114559	106927	119809	106233	109840	110989	-1.01046	-0.0150196	down	0.938378	0.953714	no
Jr10_01370_p1	108998904	Q9T0G2	VIT_18s0001g05810	Cytochrome c-2	12386	1.81249e+06	1.50011e+06	1.64671e+06	1.71046e+06	1.53055e+06	1.77103e+06	1.6531e+06	1.67068e+06	-1.01063	-0.0152576	down	0.915534	0.93627	no
Jr02_22600_p1 (+1)	109013857	Q9FL69	VIT_19s0014g03510	ADP-ribosylation factor GTPase-activating protein AGD5 (ARF GAP AGD5)	50408	261012	209026	236534	207854	248993	257413	235524	238087	-1.01088	-0.0156136	down	0.935178	0.951929	no
Jr14_12550_p1	108989603	Q9XEA0	VIT_06s0004g03630	Leucine--tRNA ligase, chloroplastic/mitochondrial	45815	80458.2	73587	92136.5	100623	81382.5	66862.1	82060.6	82956	-1.01091	-0.0156572	down	0.94782	0.961235	no
Jr12_07560_p1 (+1)	108992479	O22145	VIT_05s0102g00570	Probable tRNA N6-adenosine threonylcarbamoyltransferase, mitochondrial	42356	85713.6	75832.6	89057.9	85244.9	83711.5	84414.8	83534.7	84457.1	-1.01104	-0.0158423	down	0.936242	0.952424	no
Jr05_01820_p1	108989465	Q9LKJ1	VIT_09s0002g07160	3-hydroxyisobutyryl-CoA hydrolase 1	42746	163451	184877	168926	186841	164049	172391	172418	174427	-1.01165	-0.0167142	down	0.926967	0.944155	no
Jr05_01380_p1	108989109	Q9LK88	VIT_13s0084g00850	NADPH:quinone oxidoreductase	21441	488420	503852	407654	435808	488150	492329	466642	472096	-1.01169	-0.0167637	down	0.919316	0.938391	no
Jr01_22440_p1	109000458	Q681Q7	VIT_12s0028g02380	Uncharacterized protein At1g03900	42237	2.62116e+06	2.31199e+06	2.79629e+06	2.49506e+06	2.61242e+06	2.7178e+06	2.57648e+06	2.60843e+06	-1.0124	-0.017783	down	0.893814	0.919192	no
Jr11_20590_p1	108991338	Q9LT78	VIT_18s0001g13270	Probable cysteine protease RD21C	53063	772102	799844	742213	863905	756120	723187	771386	781071	-1.01255	-0.0179996	down	0.902917	0.925666	no
Jr07_16450_p1	109020906	O49290	VIT_05s0124g00020	Carboxyvinyl-carboxyphosphonate phosphorylmutase, chloroplastic	53463	3.75438e+06	3.64979e+06	3.66163e+06	3.90557e+06	3.79834e+06	3.51063e+06	3.6886e+06	3.73818e+06	-1.01344	-0.0192612	down	0.868936	0.897247	no
Jr07_36500_p1 (+2)	108986328	Q9LHA8	VIT_06s0004g04510	Probable mediator of RNA polymerase II transcription subunit 37c	45732	2.03574e+07	2.20095e+07	2.04417e+07	2.29148e+07	2.16877e+07	1.90515e+07	2.09362e+07	2.1218e+07	-1.01346	-0.0192886	down	0.879309	0.905972	no
Jr14_11750_p1	#N/A	P42798	VIT_13s0019g00530	40S ribosomal protein S15a-1	14705	345080	225912	302691	237752	364680	283316	291228	295249	-1.01381	-0.0197858	down	0.935671	0.952137	no
Jr10_04120_p1 (+2)	109010115	Q9FJI5	VIT_14s0171g00490	Glucose-6-phosphate 1-dehydrogenase, cytoplasmic isoform 2	59301	7.01456e+06	8.03641e+06	7.20185e+06	8.15165e+06	7.69001e+06	6.7234e+06	7.41761e+06	7.52168e+06	-1.01403	-0.0201019	down	0.878876	0.905808	no
Jr16_03970_p1	108989562	Q9M9M6	VIT_16s0039g02120	NADH dehydrogenase [ubiquinone] iron-sulfur protein 6, mitochondrial	13380	2.27688e+06	1.90647e+06	1.97235e+06	1.8568e+06	1.85222e+06	2.53362e+06	2.0519e+06	2.08088e+06	-1.01412	-0.0202353	down	0.907539	0.929537	no
Jr03_16800_p1_family	#N/A	P49204	VIT_06s0004g07150	40S ribosomal protein S4-2	29813	3.37893e+06	5.45742e+06	7.49943e+06	5.12446e+06	6.83279e+06	4.61592e+06	5.44526e+06	5.52439e+06	-1.01453	-0.0208141	down	0.943672	0.957913	no
Jr03_18550_p1	109002511	Q9ASS2	VIT_00s0361g00100	Protein FREE1	147562	1.22466e+06	1.03158e+06	1.08842e+06	964253	1.25843e+06	1.172e+06	1.11489e+06	1.13156e+06	-1.01496	-0.0214186	down	0.89537	0.919738	no
Jr15_10280_p1 (+2)	108997765	Q8GTY0	VIT_17s0000g02860	Elongation factor 1-alpha 4 (EF-1-alpha 4)	58029	1.21077e+07	1.29869e+07	1.3715e+07	1.29903e+07	1.4377e+07	1.20307e+07	1.29365e+07	1.31327e+07	-1.01516	-0.0217125	down	0.865113	0.89442	no
Jr15_10340_p1	108997764	Q9ZW85	VIT_00s0551g00010	3-isopropylmalate dehydratase small subunit 3	27347	1.43549e+07	1.35216e+07	1.42155e+07	1.34007e+07	1.42404e+07	1.50951e+07	1.40307e+07	1.42454e+07	-1.0153	-0.0219102	down	0.850916	0.883901	no
Jr11_04320_p1	108987880	Q8VZ10	VIT_14s0060g01030	Protein SUPPRESSOR OF QUENCHING 1, chloroplastic	119789	899640	635676	809581	1.01718e+06	675176	688529	781632	793627	-1.01535	-0.0219715	down	0.922316	0.94087	no
Jr13_08310_p1	108986997	Q84TF0	VIT_03s0038g00800	Aldo-keto reductase family 4 member C10	34822	8.78472e+06	8.15223e+06	9.21296e+06	8.78833e+06	9.08918e+06	8.68499e+06	8.71664e+06	8.85417e+06	-1.01578	-0.0225852	down	0.845059	0.879758	no
Jr10_00680_p1 (+1)	109001884	Q84TD8	VIT_14s0083g00450	Protein FLX-like 2 (AtFLXL2)	46810	978403	916582	1.10288e+06	886974	1.03349e+06	1.12473e+06	999290	1.01506e+06	-1.01578	-0.0225925	down	0.887966	0.914033	no
Jr07_21330_p1	109000351	O65482	VIT_05s0077g02200	Putative cysteine-rich receptor-like protein kinase 23 (Cysteine-rich RLK23)	19816	1.65713e+06	1.32087e+06	1.62401e+06	1.30091e+06	1.44927e+06	1.92769e+06	1.534e+06	1.55929e+06	-1.01648	-0.0235877	down	0.902803	0.925666	no
Jr09_03400_p1 (+1)	108982557	Q8L5Y9	VIT_17s0000g08520	Pantothenate kinase 2 (AtPANK2)	100649	144484	152913	184233	172972	182729	135028	160543	163576	-1.01889	-0.0270037	down	0.90053	0.923793	no
Jr15_07920_p1 (+2)	109020557	Q9SRU2	VIT_19s0014g02690	Auxin transport protein BIG	14086	133076	155469	156112	116772	172794	163601	148219	151056	-1.01914	-0.0273475	down	0.903615	0.926093	no
Jr01_26210_p1	109009074	O65398	VIT_11s0016g01820	Lactoylglutathione lyase GLX1	22589	227946	145360	250218	173816	233760	227888	207841	211821	-1.01915	-0.0273639	down	0.916676	0.936567	no
Jr05_06980_p1	108989877	P93028	VIT_06s0004g07060	Ubiquitin-activating enzyme E1 1 (AtUBA1)	128096	446572	323301	494028	392172	455371	441156	421300	429566	-1.01962	-0.028032	down	0.891223	0.916814	no
Jr16_13910_p1	109003151	Q8GYF7	VIT_01s0010g03310	Nuclear pore complex protein NUP54	41071	384724	328777	348050	311095	380650	391102	353850	360949	-1.02006	-0.0286565	down	0.871531	0.899645	no
Jr16_02080_p1	109012503	F4I718	VIT_14s0128g00480	Protein CELLULOSE SYNTHASE INTERACTIVE 3	25240	2.27705e+06	2.74291e+06	2.53945e+06	2.75908e+06	2.47249e+06	2.48095e+06	2.5198e+06	2.57084e+06	-1.02026	-0.0289312	down	0.831177	0.868269	no
Jr05_08290_p1	109002668	Q9M331	VIT_06s0004g05000	Protein NRT1/ PTR FAMILY 5.7 (AtNPF5.7)	20406	55168.2	69920.6	46251.5	64900.2	58283.6	51679.9	57113.5	58287.9	-1.02056	-0.0293664	down	0.904552	0.926765	no
Jr08_15500_p1	109007797	Q9ASW8	VIT_14s0081g00480	Protein WVD2-like 2	49610	490240	573175	502869	404728	568276	626527	522095	533177	-1.02123	-0.0303034	down	0.882562	0.908755	no
Jr07_35230_p1 (+1)	109020688	Q9FT52	VIT_13s0019g03860	ATP synthase subunit d, mitochondrial (ATPase subunit d)	19663	3.87967e+07	3.9271e+07	3.87193e+07	3.93592e+07	3.57763e+07	4.41564e+07	3.8929e+07	3.9764e+07	-1.02145	-0.0306175	down	0.81297	0.855539	no
Jr02_20310_p1	109011754	Q93V84	VIT_19s0014g00260	Protein FLX-like 1 (AtFLXL1)	34446	276384	263246	292325	270742	256438	323784	277318	283655	-1.02285	-0.0325946	down	0.85608	0.886269	no
Jr14_00950_p1	108983932	Q9LXD1	VIT_13s0064g00450	Cytochrome b5 domain-containing protein RLF	24897	3.95717e+06	4.02665e+06	3.76173e+06	4.17501e+06	3.76336e+06	4.07628e+06	3.91519e+06	4.00488e+06	-1.02291	-0.0326791	down	0.780607	0.829538	no
Jr12_07090_p1 (+1)	108992465	Q8VXZ9	VIT_09s0018g01880	Polyadenylate-binding protein RBP47B' (Poly(A)-binding protein RBP47B')	35569	593691	592385	542364	618852	576852	572866	576147	589524	-1.02322	-0.0331129	down	0.819639	0.860454	no
Jr07_16220_p1	108987334	Q9ZW82	VIT_05s0062g01190	Pirin-like protein 2	36278	3.4097e+06	3.24156e+06	3.78499e+06	3.31064e+06	3.63584e+06	3.74041e+06	3.47875e+06	3.5623e+06	-1.02402	-0.0342384	down	0.789649	0.837953	no
Jr01_04210_p1	108992808	Q9S7E4	VIT_14s0066g01320	Formate dehydrogenase, chloroplastic/mitochondrial (FDH)	42134	7.73609e+07	7.36931e+07	8.11638e+07	7.56512e+07	7.88311e+07	8.35449e+07	7.74059e+07	7.93424e+07	-1.02502	-0.035648	down	0.769689	0.820736	no
Jr06_12130_p1	108993925	P50287	VIT_17s0000g04910	Isoaspartyl peptidase/L-asparaginase 1 subunit beta	33171	3.22127e+06	3.73391e+06	3.46445e+06	3.55505e+06	3.33072e+06	3.79624e+06	3.47321e+06	3.56067e+06	-1.02518	-0.0358798	down	0.778297	0.827773	no
Jr07_35590_p1	109013074	Q94JV5	VIT_13s0067g03530	Nitrilase-like protein 2	35446	3.92553e+06	4.25467e+06	4.00407e+06	4.42788e+06	4.17678e+06	3.89064e+06	4.06142e+06	4.1651e+06	-1.02553	-0.036366	down	0.761202	0.814057	no
Jr07_24240_p1 (+2)	108989467	Q84LM4	VIT_05s0020g04590	Acylamino-acid-releasing enzyme (AARE)	89993	2.68257e+06	2.64505e+06	2.87173e+06	3.16684e+06	2.99576e+06	2.2469e+06	2.73312e+06	2.80316e+06	-1.02563	-0.0365079	down	0.822666	0.862164	no
Jr11_21490_p1	108981297	Q9SZJ5	VIT_18s0001g07960	Serine hydroxymethyltransferase 1, mitochondrial (AtSHMT1)	57076	5.63772e+06	5.64585e+06	5.50669e+06	5.75051e+06	5.311e+06	6.15933e+06	5.59675e+06	5.74028e+06	-1.02564	-0.0365314	down	0.756578	0.8099	no
Jr10_01600_p1_family	#N/A	Q8GYB8	VIT_18s0041g02060	12-oxophytodienoate reductase 2	41133	3.35202e+06	2.85001e+06	3.40911e+06	3.62936e+06	3.09488e+06	3.13372e+06	3.20371e+06	3.28599e+06	-1.02568	-0.036583	down	0.793679	0.840876	no
Jr15_08200_p1 (+1)	109012220	Q8LPN7	VIT_17s0053g00320	E3 ubiquitin-protein ligase RING1-like	40224	486383	503147	525773	559308	534389	460523	505101	518073	-1.02568	-0.0365845	down	0.815891	0.858028	no
Jr12_19330_p1	109009145	Q9C827	VIT_09s0002g04810	Coatomer subunit beta'-2	34081	6.97534e+06	7.64696e+06	6.45769e+06	7.80201e+06	7.19572e+06	6.62683e+06	7.02666e+06	7.20819e+06	-1.02583	-0.0367964	down	0.777675	0.827378	no
Jr07_30980_p1	108984534	O81305	VIT_09s0002g06430	Type III polyketide synthase C (PKS-C)	26170	54430.5	68187.6	60214.4	63008.9	64228.4	60419.1	60944.2	62552.1	-1.02638	-0.0375711	down	0.85733	0.887209	no
Jr14_05470_p1	109014157	Q9CAF5	VIT_13s0084g00110	ABC transporter I family member 6, chloroplastic (ABC transporter ABCI.6; AtABCI6)	38298	1.3138e+06	1.41738e+06	1.3376e+06	1.29317e+06	1.42205e+06	1.46156e+06	1.35626e+06	1.39226e+06	-1.02654	-0.0377889	down	0.77764	0.827378	no
Jr01_01070_p1	109001303	Q9FMU6	VIT_14s0068g01260	Mitochondrial phosphate carrier protein 3, mitochondrial	39719	447400	516904	546155	553041	565713	432685	503486	517146	-1.02713	-0.0386193	down	0.829871	0.867509	no
Jr16_05310_p1	109007547	Q84WW2	VIT_16s0098g01200	Probable 6-phosphogluconolactonase 5, chloroplastic (6PGL 5)	27876	1.97141e+07	1.98841e+07	1.94255e+07	1.94857e+07	1.8441e+07	2.27005e+07	1.96746e+07	2.02091e+07	-1.02717	-0.0386704	down	0.76355	0.816038	no
Jr01_21090_p1	108999646	F4JIF4	VIT_12s0028g03730	Protein NETWORKED 1B	58129	690173	629896	678888	567778	727353	758609	666319	684580	-1.02741	-0.0390062	down	0.816759	0.858028	no
Jr10_20920_p1 (+1)	108980416	Q8H0W1	VIT_11s0016g03820	Chloroplast processing peptidase	35123	100484	76786.7	77180.8	86320.2	85229.1	90056.6	84817	87202	-1.02812	-0.0400052	down	0.851959	0.884428	no
Jr08_19870_p1_family	109021384	O80526	VIT_14s0060g00550	ATP-citrate synthase alpha chain protein 3 (ATP-citrate synthase A-3)	46592	2.44439e+06	2.17828e+06	2.51603e+06	2.6199e+06	2.48704e+06	2.23349e+06	2.37957e+06	2.44681e+06	-1.02826	-0.0402034	down	0.7673	0.818791	no
Jr12_13010_p1	109005844	Q9LFE0	VIT_11s0078g00440	SART-1 family protein DOT2	108130	101409	80313.7	107541	97440.5	116212	84195.5	96421.1	99282.7	-1.02968	-0.0421928	down	0.856019	0.886269	no
Jr01_18060_p1	#N/A	Q9SL67	VIT_07s0005g05160	26S proteasome regulatory subunit 4 homolog B	52676	419846	307033	320269	308749	365664	405151	349049	359855	-1.03096	-0.0439843	down	0.829663	0.867509	no
Jr01_33660_p1	#N/A	Q9SUW1	VIT_12s0059g00590	Probable xyloglucan galactosyltransferase GT19	19740	8.99651e+07	1.36786e+08	1.73247e+08	1.5707e+08	1.30437e+08	1.24934e+08	1.33333e+08	1.3748e+08	-1.0311	-0.0441905	down	0.855941	0.886269	no
Jr15_00290_p1	109002724	Q6DYE4	VIT_01s0011g02870	Uncharacterized protein At1g26090, chloroplastic	48228	29385.7	52140.9	27874.5	61350.8	26668.5	24857.1	36467	37625.5	-1.03177	-0.0451178	down	0.917613	0.936943	no
Jr12_02730_p1	108998274	Q8GYN5	VIT_00s0231g00040	RPM1-interacting protein 4	27644	356879	390528	204463	305272	333668	343226	317290	327389	-1.03183	-0.0452017	down	0.863304	0.89311	no
Jr09_13960_p1 (+1)	108992718	Q9SEU6	VIT_19s0014g02890	Thioredoxin M4, chloroplastic (AtTrxm4)	19879	5.36331e+06	5.18302e+06	4.55669e+06	5.49761e+06	4.6604e+06	5.42571e+06	5.03434e+06	5.19457e+06	-1.03183	-0.0452021	down	0.733965	0.792226	no
Jr02_11260_p1 (+2)	108987601	Q9SVC2	VIT_04s0044g00540	Syntaxin-122 (AtSYP122)	35841	1.04812e+06	1.11297e+06	1.03495e+06	1.1381e+06	1.04507e+06	1.11734e+06	1.06534e+06	1.10017e+06	-1.03269	-0.0464079	down	0.72913	0.789159	no
Jr12_24080_p1	109002728	Q58FX0	VIT_06s0004g06150	BON1-associated protein 2	36524	546755	524890	424220	437301	538857	569027	498622	515062	-1.03297	-0.0467993	down	0.800547	0.84652	no
Jr13_10810_p1	108997462	P43333	VIT_01s0150g00590	U2 small nuclear ribonucleoprotein A' (U2 snRNP A')	32700	4.01548e+06	3.54414e+06	3.81554e+06	3.65037e+06	3.9036e+06	4.20252e+06	3.79172e+06	3.91883e+06	-1.03352	-0.047571	down	0.703586	0.770471	no
Jr07_14600_p1	109008438	O23254	VIT_05s0029g00310	Serine hydroxymethyltransferase 4 (AtSHMT4)	51855	1.70944e+07	1.5732e+07	1.51109e+07	1.81683e+07	1.59763e+07	1.5405e+07	1.59791e+07	1.65165e+07	-1.03363	-0.0477259	down	0.708675	0.774024	no
Jr04_21780_p1	#N/A	Q9LXJ0	VIT_08s0007g03390	Cell division protein FtsZ homolog 2-2, chloroplastic (AtFtsZ2-2)	51215	99191	102636	89488.2	71184.9	114345	115760	97105.1	100430	-1.03424	-0.0485704	down	0.848356	0.882076	no
Jr04_13150_p1	109004567	Q9M8S8	VIT_10s0405g00030	Inositol-phosphate phosphatase	29163	194418	207441	201337	218415	206190	199646	201066	208084	-1.03491	-0.0494989	down	0.77395	0.824213	no
Jr08_08700_p1	#N/A	P12411	VIT_18s0001g14360	Tubulin beta-1 chain	50238	175000	183279	209983	243875	184140	160240	189421	196085	-1.03518	-0.0498867	down	0.824065	0.863016	no
Jr11_31020_p1	108987669	Q56Z59	VIT_18s0041g00420	Patellin-3	65627	651573	643643	679130	761004	717598	568518	658115	682373	-1.03686	-0.0522212	down	0.753035	0.807442	no
Jr09_04270_p1	108980899	Q93ZT6	VIT_17s0000g09870	Eukaryotic translation initiation factor isoform 4G-1 (eIF(iso)4G-1)	78039	62660.9	48803.3	68268.3	67219.4	63239.3	55925.9	59910.9	62128.2	-1.03701	-0.0524307	down	0.819729	0.860454	no
Jr03_24410_p1	109004863	Q8W487	VIT_13s0019g02350	Uncharacterized protein At2g39795, mitochondrial	28458	4.96171e+06	4.68781e+06	4.81226e+06	5.24189e+06	4.49865e+06	5.2577e+06	4.82059e+06	4.99941e+06	-1.03709	-0.0525474	down	0.667937	0.739014	no
Jr10_07100_p1	108986460	Q9C7F5	VIT_14s0068g00310	Nuclear transport factor 2B (AtNTF2b; NTF-2)	50990	125174	66744.9	138288	30849.2	182700	128995	110069	114182	-1.03736	-0.0529195	down	0.92904	0.945974	no
Jr10_01990_p1	108985947	P58223	VIT_14s0108g01040	KH domain-containing protein At4g18375	58311	406382	404407	425306	364743	429590	488113	412032	427482	-1.0375	-0.0531084	down	0.759093	0.812291	no
Jr12_03640_p1 (+3)	109021424	Q9ZW24	VIT_15s0024g01540	Glutathione S-transferase U7 (AtGSTU7)	25974	780116	729799	786460	747571	894030	742271	765458	794624	-1.0381	-0.0539486	down	0.721266	0.783551	no
Jr12_02410_p1 (+1)	108997550	Q9LFF9	VIT_04s0023g02050	Soluble inorganic pyrophosphatase 4	24220	4.45604e+06	4.88049e+06	4.71719e+06	5.34601e+06	4.41146e+06	4.84722e+06	4.68457e+06	4.86823e+06	-1.0392	-0.0554794	down	0.661375	0.733476	no
Jr07_30830_p1	108996269	Q8LBK6	VIT_09s0002g06040	Monothiol glutaredoxin-S15, mitochondrial (AtGrxS15)	26914	1.01048e+07	8.70699e+06	9.86712e+06	9.22705e+06	8.84519e+06	1.17313e+07	9.55965e+06	9.93453e+06	-1.03922	-0.0554943	down	0.715747	0.778839	no
Jr05_09700_p1	109009331	Q9SWG0	VIT_06s0004g03140	Isovaleryl-CoA dehydrogenase, mitochondrial (IVD)	44581	2.87802e+06	3.26596e+06	2.52723e+06	3.22817e+06	2.99118e+06	2.79546e+06	2.8904e+06	3.00494e+06	-1.03963	-0.0560659	down	0.701619	0.768795	no
Jr06_20310_p1	109015026	O65220	VIT_11s0118g00810	Peptidyl-prolyl cis-trans isomerase CYP28, chloroplastic (PPIase CYP28)	36945	839774	640357	685592	514451	825081	912421	721908	750651	-1.03982	-0.0563274	down	0.816897	0.858028	no
Jr02_23120_p1	#N/A	Q9LSQ5	VIT_19s0014g04660	NAD(P)H dehydrogenase (quinone) FQR1	21679	4.76085e+06	4.97555e+06	4.80732e+06	4.84291e+06	5.09109e+06	5.18974e+06	4.84791e+06	5.04125e+06	-1.03988	-0.056418	down	0.613019	0.691088	no
Jr07_33510_p1	109019027	F4IW47	VIT_16s0022g01440	Transketolase-2, chloroplastic (TK)	81227	4.50978e+07	4.62744e+07	4.61045e+07	5.30671e+07	5.09066e+07	3.89905e+07	4.58256e+07	4.76547e+07	-1.03991	-0.0564653	down	0.710153	0.775017	no
Jr16_12280_p1	109003225	F4IS56	VIT_01s0182g00020	Integrin-linked protein kinase 1	48935	220808	207854	238616	252702	232905	208392	222426	231333	-1.04004	-0.0566434	down	0.754793	0.808514	no
Jr10_01940_p1	108985953	P55217	VIT_14s0108g01110	Cystathionine gamma-synthase 1, chloroplastic (AtCGS1)	63633	1.11297e+06	1.36742e+06	1.06214e+06	1.4999e+06	1.06841e+06	1.11686e+06	1.18084e+06	1.22839e+06	-1.04027	-0.0569518	down	0.766023	0.817885	no
Jr09_08070_p1 (+1)	109014281	Q9FVR6	VIT_02s0012g01900	Uncharacterized protein At1g32220, chloroplastic	32022	1.62682e+07	1.46045e+07	1.11947e+07	1.62706e+07	1.31391e+07	1.43829e+07	1.40225e+07	1.45975e+07	-1.04101	-0.0579835	down	0.737516	0.795176	no
Jr14_00510_p1	109001525	Q9FJN9	VIT_13s0064g01190	Polyadenylate-binding protein 2 (AtPabN2; AtPabN3; Poly(A)-binding protein 2)	77337	28284.1	27638.1	22890.4	23882.7	28221.6	29940.8	26270.9	27348.4	-1.04102	-0.057991	down	0.799648	0.845911	no
Jr13_08280_p1	108986990	F4JHT3	VIT_03s0038g00750	BEACH domain-containing protein A2	41470	4.85495e+06	5.11646e+06	4.50114e+06	5.5268e+06	4.66205e+06	4.88477e+06	4.82418e+06	5.02454e+06	-1.04153	-0.0587083	down	0.645396	0.720361	no
Jr16_12240_p1 (+1)	109003223	Q9SCV3	VIT_14s0006g02010	Beta-galactosidase 9 (Lactase 9)	12987	2.37864e+06	2.60816e+06	1.88326e+06	2.59763e+06	1.9803e+06	2.58487e+06	2.29002e+06	2.3876e+06	-1.04261	-0.0602	down	0.740919	0.798323	no
Jr07_22550_p1 (+1)	108983014	Q8W034	VIT_05s0049g01660	Heterogeneous nuclear ribonucleoprotein 1 (hnRNP1)	47720	1.90598e+06	1.83039e+06	1.86114e+06	1.84241e+06	2.01476e+06	1.98162e+06	1.86584e+06	1.94626e+06	-1.0431	-0.0608823	down	0.624901	0.701763	no
Jr04_11990_p1	109011212	P42698	VIT_10s0003g04720	DNA-damage-repair/toleration protein DRT111, chloroplastic	42928	161233	196333	208755	213593	176157	201037	188774	196929	-1.0432	-0.0610162	down	0.759305	0.812291	no
Jr11_05280_p1	109002577	O49543	VIT_17s0000g03490	Cysteine desulfurase, mitochondrial	51254	3.80124e+06	3.776e+06	4.20653e+06	4.12702e+06	4.01902e+06	4.15079e+06	3.92792e+06	4.09894e+06	-1.04354	-0.0614852	down	0.598829	0.678206	no
Jr11_22410_p1 (+2)	108985216	P93009	VIT_18s0001g07230	Protein CutA, chloroplastic	20884	5.5943e+06	4.99e+06	5.79705e+06	5.75163e+06	4.85225e+06	6.4923e+06	5.46045e+06	5.69873e+06	-1.04364	-0.0616199	down	0.67915	0.749156	no
Jr14_05060_p1	109002168	Q9CAF2	VIT_08s0056g00030	Nudix hydrolase 26, chloroplastic (AtNUDT26)	23445	1.4695e+06	1.55505e+06	1.59965e+06	1.66839e+06	1.54121e+06	1.61653e+06	1.5414e+06	1.60871e+06	-1.04367	-0.0616619	down	0.631383	0.707856	no
Jr09_04210_p1	108986724	Q9FKF7	VIT_17s0000g09780	Peptide methionine sulfoxide reductase A1 (AtMSRA1)	21345	2.68872e+06	1.93375e+06	2.20448e+06	2.02806e+06	2.54728e+06	2.55002e+06	2.27565e+06	2.37512e+06	-1.04371	-0.0617221	down	0.725165	0.786231	no
Jr12_04580_p1	109002710	P19172	VIT_15s0046g01710	Acidic endochitinase	31813	169518	94734.9	189553	73771.1	233334	166557	151269	157887	-1.04375	-0.061781	down	0.889674	0.915505	no
Jr14_07430_p1	108996969	Q9SEI4	VIT_06s0004g08220	26S proteasome regulatory subunit 6B homolog	52619	2.07566e+06	2.31598e+06	2.07753e+06	2.41017e+06	2.0992e+06	2.2447e+06	2.15639e+06	2.25136e+06	-1.04404	-0.0621769	down	0.637076	0.71349	no
Jr12_21740_p1	108984032	O22703	VIT_13s0019g05080	Glycine-rich RNA-binding protein RZ1B (AtRZ-1a)	30813	756705	651465	591659	659718	686964	741425	666610	696036	-1.04414	-0.0623188	down	0.69717	0.764683	no
Jr01_01330_p1	109001323	Q9XER9	VIT_14s0068g01560	ENHANCER OF AG-4 protein 2	58175	27326.5	19966.2	23681.4	23009.8	23099.7	28010.3	23658.1	24706.6	-1.04432	-0.0625608	down	0.792456	0.84012	no
Jr01_33310_p1	109012669	Q9LNE4	VIT_07s0005g04760	Probable fructokinase-3	45655	149906	165279	127959	163629	142200	156997	147715	154276	-1.04442	-0.0626959	down	0.753057	0.807442	no
Jr06_11950_p1 (+2)	108979354	A4GSN8	VIT_19s0085g01090	Nuclear-pore anchor	237877	49735.3	34625.2	56828.9	37277.4	56914.9	53495.8	47063.1	49229.4	-1.04603	-0.0649215	down	0.82163	0.861756	no
Jr12_00140_p1	109003546	Q9ASS2	VIT_18s0001g14750	Protein FREE1	62668	2.73065e+06	2.79955e+06	2.65764e+06	2.91629e+06	2.91552e+06	2.73317e+06	2.72928e+06	2.85499e+06	-1.04606	-0.0649677	down	0.583594	0.66443	no
Jr07_30880_p1	108996377	Q8LAZ7	VIT_09s0002g06100	COP9 signalosome complex subunit 5a (Signalosome subunit 5a)	47868	128064	131282	138470	144964	149027	122240	132605	138744	-1.04629	-0.065284	down	0.735407	0.793161	no
Jr13_11360_p1	108997328	Q9FND9	VIT_01s0150g00190	Probable galactinol--sucrose galactosyltransferase 5	47447	1.03408e+08	1.12614e+08	1.07708e+08	1.25926e+08	1.14897e+08	9.79443e+07	1.0791e+08	1.12923e+08	-1.04645	-0.0655061	down	0.643948	0.719568	no
Jr07_32560_p1	#N/A	F4K5W8	VIT_09s0018g01610	Sucrose synthase 5 (AtSUS5)	32697	4.4079e+06	3.81391e+06	4.01696e+06	3.85613e+06	4.37484e+06	4.57957e+06	4.07959e+06	4.27018e+06	-1.04672	-0.0658718	down	0.614058	0.691707	no
[truncated: 1,505 more rows]

## Sheet: Table S2
Table S2. Proteome of 676 proteins of Xanthomonas arboricola pv. junglandis 417.
[truncated: 677 more rows]

## Sheet: Table S3
Table S3. Complete list of PLS-DA - VIP scores for Juglans regia.
[truncated: 3,297 more rows]

[truncated: 8 more sheets: Table S4, Table S5, Table S6, Table S7, Table S8, Table S9, Table S10, Table S11]
